# Supplementary material for: Transcriptome differences between Cupriavidus necator NH9 grown with 3-chlorobenzoate and that grown with benzoate
Source: Research Square preprint supplement (doi:10.21203/rs.3.rs-50641/v2), 2020-10-16
Supplement: Supplementary file 1 [file 10c2ac8a9d302e4dabd5c9aa.xlsx]

## Sheet: TableS3
Table S3 Expression of genes involved in degradation of hydroxybenzoate and anthranilate in NH9
Compound	Replicon	Locus	Genea	K number	Definitiona	3-CB vs. CA		BA vs. CA		3-CB vs. BA
						LogFCb, c	FDRd	LogFCb, e	FDRd	LogFCb, f	FDRd
2-hydroxybenzoate	Chr.2	BJN34_24950	nahG	K00480	Salicylate hydroxylase	1.09304	0.0333031	0.41852	0.60135	0.674524	0.329729
3-hydroxybenzoate	Chr.2	BJN34_30895	mhbMg	K22270	3-hydroxybenzoate 6-monooxygenase	5.27142	3.45e-14	2.06702	0.00609485	3.2044	1.13e-06
		BJN34_30900a	mhbIg	K01801	Maleylpyruvate isomerase	4.24952	9.91e-39	1.16292	0.00821965	3.0866	8.92e-26
		BJN34_30905	mhbHg	K16165	Fumarylpyruvate hydrolase	4.08936	1.5e-34	1.2878	0.00180016	2.80157	3.18e-20
		BJN34_30910	mhbDg	K00450	Gentisate 1,2-dioxygenase	2.77873	1.81e-08	0.700663	0.319884	2.07807	4.86e-05
4-hydroxybenzoate	Chr.2	BJN34_33835	pobA	K00481	4-hydroxybenzoate 3-monooxygenase	0.751971	0.213328	3.60931	5.18e-12	-2.85734	2e-08
		BJN34_33845	pcaCg	K01607g	4-carboxymuconolactone decarboxylase	0.98665	0.00148785	0.337102	0.486699	0.649548	0.0856785
		BJN34_33850	pcaB	K01857	3-carboxy-cis,cis-muconate cycloisomerase	0.236777	0.587249	0.0892899	0.900796	0.147487	0.820333
		BJN34_33855	pcaG	K00448	Protocatechuate 3,4-dioxygenase alpha subunit	-0.0600191	0.932168	-0.506996	0.512119	0.446977	0.574189
		BJN34_33860	pcaH	K00449	Protocatechuate 3,4-dioxygenase beta subunit	-0.0434749	0.943068	-0.619312	0.280591	0.575837	0.333297
Anthranilate	Chr.1	BJN34_18160	andAa1	K00529	anthranilate 1,2-dioxygenase ferredoxin reductase component	3.65118	3.46e-26	-0.444593	0.572759	4.09578	8.37e-32
		BJN34_18165	andAb1	K18248	anthranilate 1,2-dioxygenase ferredoxin component	3.85356	1.24e-10	-1.5661	0.160959	5.41967	4.39e-16
		BJN34_18170	andAd1	K16320	anthranilate 1,2-dioxygenase small subunit	4.06939	6.54e-10	-0.231375	0.881919	4.30076	8.99e-11
		BJN34_18175	andAc1	K16319	anthranilate 1,2-dioxygenase large subunit	4.28342	5.06e-10	-0.315613	0.813597	4.59903	5e-11
aGene designation and definition from KEGG annotation were manually modified.
bLogFC indicates log fold-change.
cLogFC calculated from 3-CB/CA.
dFDR indicates false discovery rate.
eLogFC calculated from BA/CA.
fLogFC calculated from 3-CB/BA.
gChanged from previous study, Moriuchi et al., 2019.
