# Supplementary material for: Transcriptome differences between Cupriavidus necator NH9 grown with 3-chlorobenzoate and that grown with benzoate
Source: Research Square preprint supplement (doi:10.21203/rs.3.rs-50641/v2), 2020-10-16
Supplement: Supplementary file 2 [file 1bccc1f92d65abc2a9ea8dc8.xlsx]

## Sheet: TableS7
Table S7 Summury of enriched GO terms
Analysis condition	Categorya	GOb term	GOb ID	Number of sequences	Log fold changec	Z score	P-value	FDRd
3-chlorobenzoate vs. Citric acid	MF	structural constituent of ribosome	GO:0003735	44	-2.5872	-12.2552	0	0
	CC	ribosome	GO:0005840	42	-2.60419	-12.0471	0	0
	BP	translation	GO:0006412	43	-2.59333	-12.142	0	0
	BP	cellular aromatic compound metabolic process	GO:0006725	23	2.63825	7.91747	2.44249e-15	7.02216e-14
	BP	oxidation-reduction process	GO:0055114	608	0.603802	7.12221	1.06204e-12	2.44269e-11
	MF	oxidoreductase activity	GO:0016491	328	0.752909	7.03914	1.93423e-12	3.70727e-11
	MF	iron ion binding	GO:0005506	35	1.72815	6.16217	7.17565e-10	1.17886e-08
	MF	catalytic activity	GO:0003824	342	0.633467	5.70895	1.13675e-08	1.63408e-07
	MF	RNA binding	GO:0003723	47	-1.0508	-5.61417	1.97512e-08	2.52376e-07
	MF	2 iron, 2 sulfur cluster binding	GO:0051537	26	1.77784	5.48076	4.235e-08	4.87025e-07
	MF	ferric iron binding	GO:0008199	17	1.94716	4.89918	9.62363e-07	1.00611e-05
	MF	nucleic acid binding	GO:0003676	48	-0.812673	-4.56906	4.89918e-06	4.69505e-05
	MF	CoA-transferase activity	GO:0008410	52	0.995226	3.97262	7.10877e-05	0.000628853
	MF	metal ion binding	GO:0046872	49	0.939109	3.59333	0.000326483	0.00268182
	MF	aminoacyl-tRNA ligase activity	GO:0004812	19	-1.04077	-3.54029	0.000399682	0.00306423
	MF	GTP binding	GO:0005525	26	-0.799518	-3.31783	0.000907196	0.00652047
	BP	tRNA aminoacylation for protein translation	GO:0006418	14	-1.13631	-3.2783	0.00104435	0.00706475
	MF	endonuclease activity	GO:0004519	11	-1.23772	-3.13108	0.00174165	0.0111272
	MF	ATPase activity	GO:0016887	136	0.542784	2.89206	0.0038272	0.0231646
	MF	peptidyl-prolyl cis-trans isomerase activity	GO:0003755	11	-1.1025	-2.83082	0.00464284	0.0266963
	MF	nucleotide binding	GO:0000166	35	-0.524484	-2.76011	0.00577817	0.0316424
	MF	iron-sulfur cluster binding	GO:0051536	57	0.704515	2.68979	0.00714971	0.0373735
Benzoate vs. Citric acid	MF	structural constituent of ribosome	GO:0003735	44	-1.43102	-9.94186	0	0
	CC	ribosome	GO:0005840	42	-1.43575	-9.74271	0	0
	BP	translation	GO:0006412	43	-1.43953	-9.88183	0	0
	BP	bacterial-type flagellum-dependent cell motility	GO:0071973	14	2.04211	6.87117	6.3678e-12	1.83074e-10
	BP	cellular aromatic compound metabolic process	GO:0006725	23	1.3291	5.5234	3.32493e-08	7.64734e-07
	MF	oxidoreductase activity	GO:0016491	328	0.41867	5.02456	5.04593e-07	9.67137e-06
	MF	catalytic activity	GO:0003824	342	0.403445	4.8603	1.17211e-06	1.92561e-05
	MF	RNA binding	GO:0003723	47	-0.567294	-4.58897	4.45449e-06	6.0078e-05
	MF	CoA-transferase activity	GO:0008410	52	0.790825	4.57767	4.70176e-06	6.0078e-05
	MF	iron ion binding	GO:0005506	35	0.89287	4.33531	1.45557e-05	0.000167391
	MF	nucleic acid binding	GO:0003676	48	-0.495389	-4.15914	3.19446e-05	0.000333966
	BP	oxidation-reduction process	GO:0055114	608	0.296047	3.93738	8.2375e-05	0.000789427
	MF	endonuclease activity	GO:0004519	11	-0.973085	-3.51245	0.000443997	0.00392767
	MF	ATPase activity	GO:0016887	136	0.416299	3.20886	0.00133261	0.0109464
	MF	GTP binding	GO:0005525	26	-0.489256	-3.03101	0.00243734	0.0185344
	MF	porin activity	GO:0015288	53	-0.30136	-3.01395	0.0025787	0.0185344
	MF	oxidoreductase activity, acting on the CH-OH group of donors, NAD or NADP as acceptor	GO:0016616	26	-0.474207	-2.95733	0.00310317	0.0207499
	BP	tRNA aminoacylation for protein translation	GO:0006418	14	-0.689392	-2.94325	0.00324782	0.0207499
	MF	aminoacyl-tRNA ligase activity	GO:0004812	19	-0.550915	-2.84915	0.00438357	0.0265321
	MF	iron-sulfur cluster binding	GO:0051536	57	0.512163	2.77241	0.00556435	0.031995
	BP	peptide transport	GO:0015833	11	0.965052	2.66032	0.00780666	0.0419324
	MF	GTPase activity	GO:0003924	12	-0.667214	-2.65115	0.00802185	0.0419324
3-chlorobenzoate vs. Benzoate	MF	structural constituent of ribosome	GO:0003735	44	-1.15618	-7.38425	1.53211e-13	1.22994e-11
	CC	ribosome	GO:0005840	42	-1.16844	-7.28824	3.13971e-13	1.22994e-11
	BP	translation	GO:0006412	43	-1.1538	-7.28534	3.20854e-13	1.22994e-11
	BP	bacterial-type flagellum-dependent cell motility	GO:0071973	14	-1.81237	-6.44524	1.15418e-10	3.31827e-09
	BP	oxidation-reduction process	GO:0055114	608	0.307755	6.07116	1.26989e-09	2.92075e-08
	BP	cellular aromatic compound metabolic process	GO:0006725	23	1.30914	5.64049	1.69568e-08	3.25005e-07
	MF	2 iron, 2 sulfur cluster binding	GO:0051537	26	1.13437	5.16953	2.34679e-07	3.77393e-06
	BP	signal transduction	GO:0007165	72	-0.610794	-5.14853	2.62534e-07	3.77393e-06
	BP	chemotaxis	GO:0006935	16	-1.30615	-5.00993	5.44503e-07	6.95754e-06
	MF	oxidoreductase activity	GO:0016491	328	0.334239	4.90462	9.36087e-07	1.0765e-05
	MF	ferric iron binding	GO:0008199	17	1.28736	4.76589	1.8802e-06	1.96566e-05
	MF	iron ion binding	GO:0005506	35	0.83528	4.35475	1.3322e-05	0.000127669
	MF	metal ion binding	GO:0046872	49	0.55952	3.36008	0.0007792	0.00665333
	MF	RNA binding	GO:0003723	47	-0.483502	-3.34936	0.000809971	0.00665333
	MF	catalytic activity	GO:0003824	342	0.230021	3.21845	0.00128886	0.00988124
aBP, Biological Process; CC, Cellular Component; MF, Molecular Function.
bGO indicates gene ontology.
cLog fold change values in 3-chlorobenzoate vs. Citric acid, Benzoate vs. Citric acid, and 3-chlorobenzoate vs. Benzoate were calculated from 3-CB/CA, BA/CA, and 3-CB/BA, respectively.
dFDR indicates false discovery rate.

## Sheet: GO_0000166
Locus	Description	GO
BJN34_00710	arginine--tRNA ligase	GO:0000166
BJN34_02790	aspartate--tRNA ligase	GO:0000166
BJN34_03030	tyrosine--tRNA ligase	GO:0000166
BJN34_03155	tryptophan--tRNA ligase	GO:0000166
BJN34_03185	glycine--tRNA ligase subunit beta	GO:0000166
BJN34_03195	glycine--tRNA ligase subunit alpha	GO:0000166
BJN34_04260	cell division protein FtsK	GO:0000166
BJN34_04305	serine--tRNA ligase	GO:0000166
BJN34_06155	lysine--tRNA ligase	GO:0000166
BJN34_06405	cysteine--tRNA ligase	GO:0000166
BJN34_06420	tRNA lysidine(34) synthetase TilS	GO:0000166
BJN34_06665	methionine ABC transporter ATP-binding protein	GO:0000166
BJN34_06670	ABC transporter ATP-binding protein	GO:0000166
BJN34_06835	threonine--tRNA ligase	GO:0000166
BJN34_06855	phenylalanine--tRNA ligase subunit alpha	GO:0000166
BJN34_07910	cell division protein FtsK	GO:0000166
BJN34_08045	peptide ABC transporter ATP-binding protein	GO:0000166
BJN34_08050	methionine ABC transporter ATP-binding protein	GO:0000166
BJN34_08700	DNA polymerase II	GO:0000166
BJN34_09585	5'-nucleotidase	GO:0000166
BJN34_10690	glutathione ABC transporter ATP-binding protein GsiA	GO:0000166
BJN34_12055	histidine--tRNA ligase	GO:0000166
BJN34_12295	microcin ABC transporter ATP-binding protein	GO:0000166
BJN34_14815	valine--tRNA ligase	GO:0000166
BJN34_14905	alanine--tRNA ligase	GO:0000166
BJN34_14980	glutamine--tRNA ligase	GO:0000166
BJN34_15755	methionine--tRNA ligase	GO:0000166
BJN34_15795	peptide ABC transporter substrate-binding protein	GO:0000166
BJN34_15840	bifunctional adenosylcobinamide kinase/adenosylcobinamide-phosphate guanylyltransferase	GO:0000166
BJN34_16275	isoleucine--tRNA ligase	GO:0000166
BJN34_16745	leucine--tRNA ligase	GO:0000166
BJN34_17315	proline--tRNA ligase	GO:0000166
BJN34_17645	peptide ABC transporter ATP-binding protein	GO:0000166
BJN34_17650	methionine ABC transporter ATP-binding protein	GO:0000166
BJN34_37510	P-type conjugative transfer ATPase TrbB	GO:0000166

## Sheet: GO_0003676
Locus	Description	GO
BJN34_00085	DEAD/DEAH box helicase	GO:0003676
BJN34_00300	ATP-dependent RNA helicase DbpA	GO:0003676
BJN34_01330	type I restriction endonuclease subunit R	GO:0003676
BJN34_02790	aspartate--tRNA ligase	GO:0003676
BJN34_02995	group II intron reverse transcriptase/maturase	GO:0003676
BJN34_03235	RNA helicase	GO:0003676
BJN34_03645	exodeoxyribonuclease VII large subunit	GO:0003676
BJN34_03750	molybdenum cofactor biosynthesis protein MoaA	GO:0003676
BJN34_04495	30S ribosomal protein S1	GO:0003676
BJN34_04700	helicase SNF2	GO:0003676
BJN34_04800	group II intron reverse transcriptase/maturase	GO:0003676
BJN34_04805	DNA polymerase III subunit alpha	GO:0003676
BJN34_05550	polyribonucleotide nucleotidyltransferase	GO:0003676
BJN34_06155	lysine--tRNA ligase	GO:0003676
BJN34_06175	single-stranded-DNA-specific exonuclease RecJ	GO:0003676
BJN34_07260	RNA-binding transcriptional accessory protein	GO:0003676
BJN34_07275	helicase	GO:0003676
BJN34_07370	transcription-repair coupling factor	GO:0003676
BJN34_07620	group II intron reverse transcriptase/maturase	GO:0003676
BJN34_08720	cold-shock protein	GO:0003676
BJN34_11760	transcription termination/antitermination protein NusA	GO:0003676
BJN34_11935	ATP-dependent RNA helicase HrpA	GO:0003676
BJN34_11955	group II intron reverse transcriptase/maturase	GO:0003676
BJN34_11975	ribonuclease R	GO:0003676
BJN34_13220	ribonuclease HI	GO:0003676
BJN34_13565	group II intron reverse transcriptase/maturase	GO:0003676
BJN34_13825	ribonuclease E/G	GO:0003676
BJN34_14510	RNA helicase	GO:0003676
BJN34_14645	DEAD/DEAH box helicase	GO:0003676
BJN34_14765	DNA polymerase I	GO:0003676
BJN34_14905	alanine--tRNA ligase	GO:0003676
BJN34_16265	group II intron reverse transcriptase/maturase	GO:0003676
BJN34_16320	cold-shock protein	GO:0003676
BJN34_16600	ATP-dependent DNA helicase RecG	GO:0003676
BJN34_18705	ATP-dependent DNA helicase RecQ	GO:0003676
BJN34_19385	primosomal protein N'	GO:0003676
BJN34_19675	group II intron reverse transcriptase/maturase	GO:0003676
BJN34_20095	cold-shock protein	GO:0003676
BJN34_21270	DUF559 domain-containing protein	GO:0003676
BJN34_21310	endonuclease	GO:0003676
BJN34_21415	endonuclease	GO:0003676
BJN34_21450	cold-shock protein	GO:0003676
BJN34_27000	hypothetical protein	GO:0003676
BJN34_27985	ATP-dependent DNA helicase	GO:0003676
BJN34_32170	cold-shock protein	GO:0003676
BJN34_33515	cold-shock protein	GO:0003676
BJN34_35185	cold-shock protein	GO:0003676
BJN34_36585	cold-shock protein	GO:0003676

## Sheet: GO_0003723
Locus	Description	GO
BJN34_01170	multifunctional CCA tRNA nucleotidyl transferase/2'3'-cyclic phosphodiesterase/2'nucleotidase/phosphatase	GO:0003723
BJN34_0130	type I toxin-antitoxin system SymE family toxin	GO:0003723
BJN34_01365	RNA chaperone Hfq	GO:0003723
BJN34_0140	type I addiction module toxin, SymE family	GO:0003723
BJN34_02155	tRNA (uridine(34)/cytosine(34)/5- carboxymethylaminomethyluridine(34)-2'-O)- methyltransferase TrmL	GO:0003723
BJN34_02260	ANTAR domain-containing protein	GO:0003723
BJN34_03030	tyrosine--tRNA ligase	GO:0003723
BJN34_04830	ribonuclease E/G	GO:0003723
BJN34_05550	polyribonucleotide nucleotidyltransferase	GO:0003723
BJN34_05990	RNA-binding protein	GO:0003723
BJN34_06375	RNA methyltransferase	GO:0003723
BJN34_06860	phenylalanine--tRNA ligase subunit beta	GO:0003723
BJN34_07285	pseudouridine synthase	GO:0003723
BJN34_10380	SsrA-binding protein	GO:0003723
BJN34_10405	RNA methyltransferase	GO:0003723
BJN34_10495	16S rRNA pseudouridylate synthase	GO:0003723
BJN34_11745	tRNA pseudouridine(55) synthase TruB	GO:0003723
BJN34_11760	transcription termination/antitermination protein NusA	GO:0003723
BJN34_11770	23S rRNA pseudouridylate synthase B	GO:0003723
BJN34_11970	23S rRNA (guanosine(2251)-2'-O)-methyltransferase RlmB	GO:0003723
BJN34_11975	ribonuclease R	GO:0003723
BJN34_12035	RNA chaperone Hfq	GO:0003723
BJN34_12225	transcription termination factor Rho	GO:0003723
BJN34_13050	translation initiation factor IF-1	GO:0003723
BJN34_13135	RNA-binding protein	GO:0003723
BJN34_13700	GTPase Era	GO:0003723
BJN34_13820	RNA pseudouridine synthase	GO:0003723
BJN34_13825	ribonuclease E/G	GO:0003723
BJN34_14015	tRNA pseudouridine(38-40) synthase TruA	GO:0003723
BJN34_15335	N utilization substance protein B	GO:0003723
BJN34_15610	16S rRNA pseudouridine(516) synthase	GO:0003723
BJN34_16335	pseudouridine synthase	GO:0003723
BJN34_16380	30S ribosomal protein S20	GO:0003723
BJN34_16460	poly(A) polymerase	GO:0003723
BJN34_16715	RNA methyltransferase	GO:0003723
BJN34_16800	ribonuclease	GO:0003723
BJN34_16865	ribonuclease II	GO:0003723
BJN34_17330	glutamate 5-kinase	GO:0003723
BJN34_18525	30S ribosomal protein S4	GO:0003723
BJN34_18535	30S ribosomal protein S13	GO:0003723
BJN34_18545	translation initiation factor IF-1	GO:0003723
BJN34_18565	30S ribosomal protein S5	GO:0003723
BJN34_18620	30S ribosomal protein S3	GO:0003723
BJN34_21305	RNA chaperone Hfq	GO:0003723
BJN34_21410	RNA chaperone Hfq	GO:0003723
BJN34_32145	translation initiation factor IF-1	GO:0003723
BJN34_34105	RNA-binding protein hfq	GO:0003723

## Sheet: GO_0003735
Locus	Description	GO
BJN34_02310	50S ribosomal protein L25/general stress protein Ctc	GO:0003735
BJN34_02980	50S ribosomal protein L13	GO:0003735
BJN34_02985	30S ribosomal protein S9	GO:0003735
BJN34_04770	30S ribosomal protein S16	GO:0003735
BJN34_04785	50S ribosomal protein L19	GO:0003735
BJN34_05545	30S ribosomal protein S15	GO:0003735
BJN34_06845	50S ribosomal protein L35	GO:0003735
BJN34_06850	50S ribosomal protein L20	GO:0003735
BJN34_10480	30S ribosomal protein S2	GO:0003735
BJN34_11615	30S ribosomal protein S18	GO:0003735
BJN34_11625	30S ribosomal protein S6	GO:0003735
BJN34_12235	50S ribosomal protein L31	GO:0003735
BJN34_13785	50S ribosomal protein L32	GO:0003735
BJN34_13930	30S ribosomal protein S21	GO:0003735
BJN34_14700	30S ribosomal protein S21	GO:0003735
BJN34_16210	50S ribosomal protein L28	GO:0003735
BJN34_16215	50S ribosomal protein L33	GO:0003735
BJN34_16380	30S ribosomal protein S20	GO:0003735
BJN34_17340	50S ribosomal protein L27	GO:0003735
BJN34_18515	50S ribosomal protein L17	GO:0003735
BJN34_18530	30S ribosomal protein S11	GO:0003735
BJN34_18535	30S ribosomal protein S13	GO:0003735
BJN34_18540	50S ribosomal protein L36	GO:0003735
BJN34_18565	30S ribosomal protein S5	GO:0003735
BJN34_18570	50S ribosomal protein L18	GO:0003735
BJN34_18575	50S ribosomal protein L6	GO:0003735
BJN34_18580	30S ribosomal protein S8	GO:0003735
BJN34_18585	30S ribosomal protein S14	GO:0003735
BJN34_18595	50S ribosomal protein L24	GO:0003735
BJN34_18600	50S ribosomal protein L14	GO:0003735
BJN34_18605	30S ribosomal protein S17	GO:0003735
BJN34_18610	50S ribosomal protein L29	GO:0003735
BJN34_18615	50S ribosomal protein L16	GO:0003735
BJN34_18620	30S ribosomal protein S3	GO:0003735
BJN34_18625	50S ribosomal protein L22	GO:0003735
BJN34_18630	30S ribosomal protein S19	GO:0003735
BJN34_18635	50S ribosomal protein L2	GO:0003735
BJN34_18640	50S ribosomal protein L23	GO:0003735
BJN34_18645	50S ribosomal protein L4	GO:0003735
BJN34_18650	50S ribosomal protein L3	GO:0003735
BJN34_18700	30S ribosomal protein S12	GO:0003735
BJN34_18720	50S ribosomal protein L7/L12	GO:0003735
BJN34_18735	50S ribosomal protein L11	GO:0003735
BJN34_20085	50S ribosomal protein L34	GO:0003735

## Sheet: GO_0003755
Locus	Description	GO
BJN34_03140	molecular chaperone SurA	GO:0003755
BJN34_06390	cyclophilin	GO:0003755
BJN34_06395	peptidylprolyl isomerase	GO:0003755
BJN34_07550	trigger factor	GO:0003755
BJN34_07580	peptidylprolyl isomerase	GO:0003755
BJN34_07645	peptidylprolyl isomerase	GO:0003755
BJN34_14450	peptidylprolyl isomerase	GO:0003755
BJN34_15010	peptidylprolyl isomerase	GO:0003755
BJN34_16200	peptidylprolyl isomerase	GO:0003755
BJN34_33390	peptidylprolyl isomerase	GO:0003755
BJN34_33770	peptidylprolyl isomerase	GO:0003755

## Sheet: GO_0003824
Locus	Description	GO
BJN34_0010	D-glycero-beta-D-manno-heptose 1-phosphate adenylyltransferase	GO:0003824
BJN34_00360	2-hydroxyhepta-2,4-diene-1,7-dioate isomerase	GO:0003824
BJN34_00520	lipoyl synthase	GO:0003824
BJN34_00630	enoyl-CoA hydratase	GO:0003824
BJN34_00635	fumarylacetoacetate hydrolase	GO:0003824
BJN34_00810	enoyl-CoA hydratase	GO:0003824
BJN34_00830	biotin synthase BioB	GO:0003824
BJN34_00850	hydroxymethylglutaryl-CoA lyase	GO:0003824
BJN34_01160	NAD-dependent dehydratase	GO:0003824
BJN34_01705	long-chain fatty acid--CoA ligase	GO:0003824
BJN34_01735	phenylacetate--CoA ligase family protein	GO:0003824
BJN34_02265	5-carboxymethyl-2-hydroxymuconate isomerase	GO:0003824
BJN34_02295	pantetheine-phosphate adenylyltransferase	GO:0003824
BJN34_0250	hypothetical protein	GO:0003824
BJN34_02655	trehalose-phosphatase	GO:0003824
BJN34_02665	alpha,alpha-trehalose-phosphate synthase (UDP-forming)	GO:0003824
BJN34_02725	FAD-linked oxidase	GO:0003824
BJN34_02830	3-hydroxyacyl-CoA dehydrogenase	GO:0003824
BJN34_02845	enoyl-CoA hydratase	GO:0003824
BJN34_03220	tRNA (N6-isopentenyl adenosine(37)-C2)-methylthiotransferase MiaB	GO:0003824
BJN34_03315	succinate--CoA ligase subunit beta	GO:0003824
BJN34_03320	succinate--CoA ligase subunit alpha	GO:0003824
BJN34_03390	branched chain amino acid aminotransferase	GO:0003824
BJN34_03540	cysteine methyltransferase	GO:0003824
BJN34_03595	3-hydroxyacyl-CoA dehydrogenase	GO:0003824
BJN34_04000	isochorismatase	GO:0003824
BJN34_04525	ADP-glyceromanno-heptose 6-epimerase	GO:0003824
BJN34_04575	enoyl-CoA hydratase	GO:0003824
BJN34_04740	DNA repair photolyase	GO:0003824
BJN34_04805	DNA polymerase III subunit alpha	GO:0003824
BJN34_04850	nicotinate-nucleotide adenylyltransferase	GO:0003824
BJN34_04915	N-carbamoylsarcosine amidase	GO:0003824
BJN34_05055	oxygen-independent coproporphyrinogen III oxidase-like protein	GO:0003824
BJN34_05070	serine/threonine protein phosphatase	GO:0003824
BJN34_05500	acetolactate synthase, large subunit, biosynthetic type	GO:0003824
BJN34_05530	2-isopropylmalate synthase	GO:0003824
BJN34_05825	enoyl-CoA hydratase	GO:0003824
BJN34_05885	benzoylformate decarboxylase	GO:0003824
BJN34_06210	phosphogluconate dehydratase	GO:0003824
BJN34_06290	AMP-binding protein	GO:0003824
BJN34_06305	phosphatase	GO:0003824
BJN34_06470	pyruvate carboxylase	GO:0003824
BJN34_06480	6-chlorohydroxyquinol-1,2-dioxygenase	GO:0003824
BJN34_06510	long-chain fatty acid--CoA ligase	GO:0003824
BJN34_06620	CoA ester lyase	GO:0003824
BJN34_06635	fatty-acid--CoA ligase	GO:0003824
BJN34_06685	FAD-binding oxidoreductase	GO:0003824
BJN34_06765	short-chain dehydrogenase	GO:0003824
BJN34_07035	AmmeMemoRadiSam system radical SAM enzyme	GO:0003824
BJN34_07070	hydroxyacid dehydrogenase	GO:0003824
BJN34_07190	benzoyl-CoA-dihydrodiol lyase	GO:0003824
BJN34_07200	4-hydroxybenzoate--CoA ligase	GO:0003824
BJN34_07240	bifunctional UDP-4-keto-pentose/UDP-xylose synthase	GO:0003824
BJN34_07310	beta-ketoacyl-ACP reductase	GO:0003824
BJN34_07330	ribosomal protein S12 methylthiotransferase	GO:0003824
BJN34_07455	acyl-CoA synthetase	GO:0003824
BJN34_07670	long-chain fatty acid--CoA ligase	GO:0003824
BJN34_07705	3-hydroxyacyl-CoA dehydrogenase	GO:0003824
BJN34_07710	nicotinamidase	GO:0003824
BJN34_07790	NAD-dependent epimerase	GO:0003824
BJN34_08260	AMP-binding protein	GO:0003824
BJN34_08275	hydroxymethylglutaryl-CoA lyase	GO:0003824
BJN34_08290	diaminopimelate decarboxylase	GO:0003824
BJN34_08295	siderophore biosynthesis protein SbnG	GO:0003824
BJN34_08455	long-chain fatty acid--CoA ligase	GO:0003824
BJN34_08555	catechol 1,2-dioxygenase	GO:0003824
BJN34_08855	3-ketoacyl-ACP reductase	GO:0003824
BJN34_08970	fatty-acid--CoA ligase	GO:0003824
BJN34_09240	2-deoxy-D-gluconate 3-dehydrogenase	GO:0003824
BJN34_09275	3-hydroxybutyryl-CoA dehydratase	GO:0003824
BJN34_09310	AMP-binding protein	GO:0003824
BJN34_09355	4-hydroxy-2-oxovalerate aldolase	GO:0003824
BJN34_09685	2-keto-4-pentenoate hydratase	GO:0003824
BJN34_09740	hydrolase	GO:0003824
BJN34_09830	acetate--CoA ligase	GO:0003824
BJN34_09840	short chain dehydrogenase	GO:0003824
BJN34_10000	enoyl-CoA hydratase	GO:0003824
BJN34_10015	3-hydroxyacyl-CoA dehydrogenase	GO:0003824
BJN34_10020	enoyl-CoA hydratase	GO:0003824
BJN34_10120	MOSC domain-containing protein	GO:0003824
BJN34_10355	IMP dehydrogenase	GO:0003824
BJN34_10590	4-coumarate--CoA ligase	GO:0003824
BJN34_11025	arylsulfatase	GO:0003824
BJN34_11080	beta-ketoacyl-ACP reductase	GO:0003824
BJN34_11155	AMP-dependent synthetase	GO:0003824
BJN34_11340	thiamine pyrophosphate-binding protein	GO:0003824
BJN34_11490	long-chain fatty acid--CoA ligase	GO:0003824
BJN34_11520	enoyl-CoA hydratase	GO:0003824
BJN34_11680	3-hydroxyisobutyryl-CoA hydrolase	GO:0003824
BJN34_11990	3-beta hydroxysteroid dehydrogenase	GO:0003824
BJN34_12075	23S rRNA (adenine(2503)-C(2))-methyltransferase	GO:0003824
BJN34_12165	hydroxymethylglutaryl-CoA lyase	GO:0003824
BJN34_12390	enoyl-CoA hydratase	GO:0003824
BJN34_12395	acyl-CoA synthetase	GO:0003824
BJN34_12455	enoyl-CoA hydratase	GO:0003824
BJN34_12490	enoyl-CoA hydratase	GO:0003824
BJN34_12510	fatty-acid--CoA ligase	GO:0003824
BJN34_12580	enoyl-CoA hydratase	GO:0003824
BJN34_12610	enoyl-CoA hydratase	GO:0003824
BJN34_12640	feruloyl-CoA synthase	GO:0003824
BJN34_13175	2-aminobenzoate-CoA ligase	GO:0003824
BJN34_13185	enoyl-CoA hydratase	GO:0003824
BJN34_13190	3-hydroxyacyl-CoA dehydrogenase	GO:0003824
BJN34_13200	propionate--CoA ligase	GO:0003824
BJN34_13305	long-chain fatty acid--CoA ligase	GO:0003824
BJN34_13390	cysteine hydrolase	GO:0003824
BJN34_13510	D-amino acid aminotransferase	GO:0003824
BJN34_13560	acetate--CoA ligase	GO:0003824
BJN34_13780	phosphate acyltransferase	GO:0003824
BJN34_13830	cyclic pyranopterin phosphate synthase	GO:0003824
BJN34_14115	CoA ester lyase	GO:0003824
BJN34_14435	serine/threonine protein phosphatase	GO:0003824
BJN34_14720	1-deoxy-D-xylulose-5-phosphate synthase	GO:0003824
BJN34_14765	DNA polymerase I	GO:0003824
BJN34_14965	phenazine biosynthesis protein PhzC/PhzF	GO:0003824
BJN34_15030	long-chain fatty acid--CoA ligase	GO:0003824
BJN34_15120	long-chain fatty acid--CoA ligase	GO:0003824
BJN34_15355	acetoacetate--CoA ligase	GO:0003824
BJN34_15565	dTDP-4-dehydrorhamnose reductase	GO:0003824
BJN34_15570	dTDP-glucose 4,6-dehydratase	GO:0003824
BJN34_15680	lysine decarboxylase	GO:0003824
BJN34_15765	acyl-CoA synthetase	GO:0003824
BJN34_15835	cobyric acid synthase CobQ	GO:0003824
BJN34_15925	malonyl-CoA synthase	GO:0003824
BJN34_15930	enoyl-CoA hydratase	GO:0003824
BJN34_15970	dihydroxy-acid dehydratase	GO:0003824
BJN34_16015	sulfate adenylyltransferase small subunit	GO:0003824
BJN34_16020	phosphoadenosine phosphosulfate reductase	GO:0003824
BJN34_16155	NAD(P)-dependent oxidoreductase	GO:0003824
BJN34_16285	phosphopantothenate synthase	GO:0003824
BJN34_16490	aminodeoxychorismate synthase component I	GO:0003824
BJN34_16510	2-hydroxy-acid oxidase	GO:0003824
BJN34_16520	FAD-binding oxidoreductase	GO:0003824
BJN34_17615	long-chain-fatty-acid--CoA ligase	GO:0003824
BJN34_17710	enoyl-CoA hydratase	GO:0003824
BJN34_17730	2-(1,2-epoxy-1,2-dihydrophenyl)acetyl-CoA isomerase	GO:0003824
BJN34_17740	phenylacetate--CoA ligase	GO:0003824
BJN34_17870	5'-methylthioadenosine/S-adenosylhomocysteine nucleosidase	GO:0003824
BJN34_17905	3-octaprenyl-4-hydroxybenzoate carboxy-lyase	GO:0003824
BJN34_17950	long-chain fatty acid--CoA ligase	GO:0003824
BJN34_18060	3-octaprenyl-4-hydroxybenzoate carboxy-lyase	GO:0003824
BJN34_18150	catechol 1,2-dioxygenase	GO:0003824
BJN34_18285	imidazole glycerol phosphate synthase, glutamine amidotransferase subunit	GO:0003824
BJN34_18445	diaminopimelate decarboxylase	GO:0003824
BJN34_18950	indolepyruvate ferredoxin oxidoreductase	GO:0003824
BJN34_19180	2-(1,2-epoxy-1,2-dihydrophenyl)acetyl-CoA isomerase	GO:0003824
BJN34_19185	enoyl-CoA hydratase	GO:0003824
BJN34_19225	glyoxylate carboligase	GO:0003824
BJN34_19300	oxygen-independent coproporphyrinogen III oxidase	GO:0003824
BJN34_19810	sulfurase	GO:0003824
BJN34_20035	enoyl-CoA hydratase	GO:0003824
BJN34_20255	GDP-fucose synthetase	GO:0003824
BJN34_20260	GDP-mannose 4,6-dehydratase	GO:0003824
BJN34_20375	gluconate 5-dehydrogenase	GO:0003824
BJN34_20405	AMP nucleosidase	GO:0003824
BJN34_20420	2-isopropylmalate synthase	GO:0003824
BJN34_20735	ABC transporter substrate-binding protein	GO:0003824
BJN34_20890	acyl-CoA synthetase	GO:0003824
BJN34_21030	KR domain-containing protein	GO:0003824
BJN34_21440	short chain dehydrogenase	GO:0003824
BJN34_21505	GTP 3',8-cyclase MoaA	GO:0003824
BJN34_21790	UDP-glucose 4-epimerase GalE	GO:0003824
BJN34_21905	protein phosphatase CheZ	GO:0003824
BJN34_22255	long-chain fatty acid--CoA ligase	GO:0003824
BJN34_22290	enoyl-CoA hydratase	GO:0003824
BJN34_22305	acetate--CoA ligase	GO:0003824
BJN34_22610	thiamine pyrophosphate-binding protein	GO:0003824
BJN34_22750	enoyl-CoA hydratase	GO:0003824
BJN34_22770	methylated-DNA--[protein]-cysteine S-methyltransferase	GO:0003824
BJN34_22850	KR domain-containing protein	GO:0003824
BJN34_22915	CoA ester lyase	GO:0003824
BJN34_22945	CoA ester lyase	GO:0003824
BJN34_22990	long-chain fatty acid--CoA ligase	GO:0003824
BJN34_23035	dihydroxy-acid dehydratase	GO:0003824
BJN34_23110	3-oxoacyl-ACP reductase	GO:0003824
BJN34_23410	acetoacetate--CoA ligase	GO:0003824
BJN34_23435	FAA hydrolase family protein	GO:0003824
BJN34_23600	hydrolase	GO:0003824
BJN34_23875	enoyl-CoA hydratase	GO:0003824
BJN34_23885	long-chain fatty acid--CoA ligase	GO:0003824
BJN34_23980	2,3-dihydroxybenzoate-AMP ligase	GO:0003824
BJN34_24105	hypothetical protein	GO:0003824
BJN34_24115	short-chain dehydrogenase	GO:0003824
BJN34_24565	acetolactate synthase large subunit	GO:0003824
BJN34_24650	4-hydroxy-2-oxovalerate aldolase	GO:0003824
BJN34_24675	long-chain fatty acid--CoA ligase	GO:0003824
BJN34_24695	CoA ester lyase	GO:0003824
BJN34_24750	long-chain fatty acid--CoA ligase	GO:0003824
BJN34_24760	enoyl-CoA hydratase	GO:0003824
BJN34_24825	acyl-CoA synthetase	GO:0003824
BJN34_24875	hypothetical protein	GO:0003824
BJN34_24970	acyl-CoA synthetase	GO:0003824
BJN34_24985	enoyl-CoA hydratase	GO:0003824
BJN34_24990	nitronate monooxygenase	GO:0003824
BJN34_25175	protocatechuate 3,4-dioxygenase	GO:0003824
BJN34_25200	L-threonine 3-dehydrogenase	GO:0003824
BJN34_25295	pyrroloquinoline quinone biosynthesis protein PqqE	GO:0003824
BJN34_25380	branched-chain amino acid--2-keto-4-methylthiobutyrate aminotransferase	GO:0003824
BJN34_25525	long-chain fatty acid--CoA ligase	GO:0003824
BJN34_25535	enoyl-CoA hydratase	GO:0003824
BJN34_25585	AMP-dependent synthetase	GO:0003824
BJN34_25690	hypothetical protein	GO:0003824
BJN34_25720	enoyl-CoA hydratase	GO:0003824
BJN34_25750	serine/threonine-protein phosphatase	GO:0003824
BJN34_25830	hypothetical protein	GO:0003824
BJN34_25875	enoyl-CoA hydratase	GO:0003824
BJN34_25905	fumarylacetoacetase	GO:0003824
BJN34_25910	enoyl-CoA hydratase	GO:0003824
BJN34_26010	hydroxyquinol 1,2-dioxygenase	GO:0003824
BJN34_26315	feruloyl-CoA synthase	GO:0003824
BJN34_26410	2-keto-4-pentenoate hydratase	GO:0003824
BJN34_26420	feruloyl-CoA synthase	GO:0003824
BJN34_26430	4-hydroxy-2-oxovalerate aldolase	GO:0003824
BJN34_26490	long-chain fatty acid--CoA ligase	GO:0003824
BJN34_26550	fatty-acid--CoA ligase	GO:0003824
BJN34_26575	acyl-CoA synthetase	GO:0003824
BJN34_26635	enoyl-CoA hydratase	GO:0003824
BJN34_26650	hydrolase	GO:0003824
BJN34_26680	long-chain fatty acid--CoA ligase	GO:0003824
BJN34_26685	protocatechuate 3,4-dioxygenase	GO:0003824
BJN34_26790	indolepyruvate ferredoxin oxidoreductase	GO:0003824
BJN34_26870	hydroxymethylglutaryl-CoA lyase	GO:0003824
BJN34_26905	KR domain-containing protein	GO:0003824
BJN34_26990	error-prone DNA polymerase	GO:0003824
BJN34_27030	cysteine hydrolase	GO:0003824
BJN34_27135	bifunctional transcriptional activator/DNA repair enzyme protein Ada	GO:0003824
BJN34_27170	enoyl-CoA hydratase	GO:0003824
BJN34_27195	AMP-binding protein	GO:0003824
BJN34_27305	NAD(P)-dependent oxidoreductase	GO:0003824
BJN34_27310	ureidoglycolate lyase	GO:0003824
BJN34_27405	acyl-CoA synthetase	GO:0003824
BJN34_27530	2-keto-4-pentenoate hydratase	GO:0003824
BJN34_27575	4-hydroxy-2-oxoheptanedioate aldolase	GO:0003824
BJN34_27580	FAD-binding oxidoreductase	GO:0003824
BJN34_27615	enoyl-CoA hydratase	GO:0003824
BJN34_27620	enoyl-CoA hydratase	GO:0003824
BJN34_27820	fatty acid--CoA ligase	GO:0003824
BJN34_27900	cardiolipin synthase	GO:0003824
BJN34_27980	long-chain fatty acid--CoA ligase	GO:0003824
BJN34_28560	hydrolase	GO:0003824
BJN34_28565	hydrolase	GO:0003824
BJN34_28760	acetone carboxylase subunit alpha	GO:0003824
BJN34_28970	catechol 1,2-dioxygenase	GO:0003824
BJN34_29040	hydrolase	GO:0003824
BJN34_29280	AMP-dependent synthetase	GO:0003824
BJN34_29415	N-carbamoylsarcosine amidase	GO:0003824
BJN34_29615	glycosidase	GO:0003824
BJN34_29620	maltose alpha-D-glucosyltransferase	GO:0003824
BJN34_29625	1,4-alpha-glucan branching enzyme	GO:0003824
BJN34_29630	glycogen debranching enzyme GlgX	GO:0003824
BJN34_29645	malto-oligosyltrehalose trehalohydrolase	GO:0003824
BJN34_29650	malto-oligosyltrehalose synthase	GO:0003824
BJN34_29870	bifunctional UDP-4-keto-pentose/UDP-xylose synthase	GO:0003824
BJN34_29970	beta-hydroxyacyl-ACP dehydratase	GO:0003824
BJN34_30010	fumarylacetoacetase	GO:0003824
BJN34_30040	cyclohexanecarboxylate-CoA ligase	GO:0003824
BJN34_30050	2-ketocyclohexanecarboxyl-CoA hydrolase	GO:0003824
BJN34_30115	acyl-CoA synthetase	GO:0003824
BJN34_30130	oxalyl-CoA decarboxylase	GO:0003824
BJN34_30150	2-hydroxyhepta-2,4-diene-1,7-dioate isomerase	GO:0003824
BJN34_30335	long-chain fatty acid--CoA ligase	GO:0003824
BJN34_30440	2-hydroxyhepta-2,4-diene-1,7-dioate isomerase	GO:0003824
BJN34_30470	FAA hydrolase family protein	GO:0003824
BJN34_30525	acetolactate synthase, large subunit, biosynthetic type	GO:0003824
BJN34_30560	hydrolase	GO:0003824
BJN34_30570	5-oxopent-3-ene-1,2,5-tricarboxylate decarboxylase	GO:0003824
BJN34_30600	catechol 1,2-dioxygenase	GO:0003824
BJN34_30690	enoyl-CoA hydratase	GO:0003824
BJN34_30700	enoyl-CoA hydratase	GO:0003824
BJN34_30755	2,4-dihydroxyhept-2-ene-1,7-dioic acid aldolase	GO:0003824
BJN34_30775	NAD-dependent dehydratase	GO:0003824
BJN34_30905	5-carboxymethyl-2-hydroxymuconate isomerase	GO:0003824
BJN34_30920	fatty acid--CoA ligase	GO:0003824
BJN34_31050	AMP-binding protein	GO:0003824
BJN34_31070	long-chain-acyl-CoA synthetase	GO:0003824
BJN34_31100	short chain dehydrogenase	GO:0003824
BJN34_31205	long-chain fatty acid--CoA ligase	GO:0003824
BJN34_31245	CoA ester lyase	GO:0003824
BJN34_31260	enoyl-CoA hydratase	GO:0003824
BJN34_31265	acetate--CoA ligase	GO:0003824
BJN34_31355	protein kinase	GO:0003824
BJN34_31450	FAD-binding oxidoreductase	GO:0003824
BJN34_31490	nitrile hydratase subunit alpha	GO:0003824
BJN34_31595	GTP 3',8-cyclase MoaA	GO:0003824
BJN34_31710	3-hydroxybutyryl-CoA dehydratase	GO:0003824
BJN34_31960	sulfoacetaldehyde acetyltransferase	GO:0003824
BJN34_32050	phenylacetate--CoA ligase	GO:0003824
BJN34_32100	benzoyl-CoA-dihydrodiol lyase	GO:0003824
BJN34_32120	benzoate-CoA ligase family protein	GO:0003824
BJN34_32130	hydrolase	GO:0003824
BJN34_32135	nicotinamidase	GO:0003824
BJN34_32285	phosphonoacetate hydrolase	GO:0003824
BJN34_32455	enoyl-CoA hydratase	GO:0003824
BJN34_32510	long-chain-fatty-acid--CoA ligase LcfA	GO:0003824
BJN34_32520	acyl-CoA synthetase	GO:0003824
BJN34_32525	enoyl-CoA hydratase	GO:0003824
BJN34_32545	phosphodiesterase	GO:0003824
BJN34_32790	CoA ester lyase	GO:0003824
BJN34_32915	long-chain fatty acid--CoA ligase	GO:0003824
BJN34_32925	enoyl-CoA hydratase	GO:0003824
BJN34_32970	NAD(P)-dependent oxidoreductase	GO:0003824
BJN34_33025	hypothetical protein	GO:0003824
BJN34_33030	hypothetical protein	GO:0003824
BJN34_33135	acyl-phosphate glycerol 3-phosphate acyltransferase	GO:0003824
BJN34_33165	CoA ester lyase	GO:0003824
BJN34_33320	NAD-dependent dehydratase	GO:0003824
BJN34_33330	hopanoid biosynthesis associated radical SAM protein HpnH	GO:0003824
BJN34_33340	hopanoid biosynthesis associated radical SAM protein HpnJ	GO:0003824
BJN34_33455	FMN-binding glutamate synthase family protein	GO:0003824
BJN34_33525	squalene--hopene cyclase	GO:0003824
BJN34_33530	squalene--hopene cyclase	GO:0003824
BJN34_33635	pyruvate dehydrogenase (acetyl-transferring) E1 component subunit alpha	GO:0003824
BJN34_33855	protocatechuate 3,4-dioxygenase subunit alpha	GO:0003824
BJN34_33860	protocatechuate 3,4-dioxygenase subunit beta	GO:0003824
BJN34_33875	ATP-dependent acyl-CoA ligase	GO:0003824
BJN34_34330	5-oxopent-3-ene-1,2,5-tricarboxylate decarboxylase	GO:0003824
BJN34_34645	phospholipase D family protein	GO:0003824
BJN34_34685	hydroxymethylglutaryl-CoA lyase	GO:0003824
BJN34_34695	3-oxoacyl-ACP reductase	GO:0003824
BJN34_34885	long-chain fatty acid--CoA ligase	GO:0003824
BJN34_34965	enoyl-CoA hydratase	GO:0003824
BJN34_35050	cysteine methyltransferase	GO:0003824
BJN34_35125	phosphogluconate dehydratase	GO:0003824
BJN34_35255	SDR family NAD(P)-dependent oxidoreductase	GO:0003824
BJN34_35320	isochorismatase	GO:0003824
BJN34_35510	3-oxoacyl-ACP reductase	GO:0003824
BJN34_35525	SDR family NAD(P)-dependent oxidoreductase	GO:0003824
BJN34_35550	3-hydroxypropionyl-CoA dehydratase	GO:0003824
BJN34_35555	enoyl-CoA hydratase	GO:0003824
BJN34_35610	fatty-acid oxidation protein subunit alpha	GO:0003824
BJN34_35785	hydrolase	GO:0003824
BJN34_35795	aldolase	GO:0003824
BJN34_35840	acetoacetate--CoA ligase	GO:0003824
BJN34_36010	enoyl-CoA hydratase	GO:0003824
BJN34_36025	long-chain fatty acid--CoA ligase	GO:0003824
BJN34_36175	acyl-CoA synthetase	GO:0003824
BJN34_36265	enoyl-CoA hydratase/isomerase family protein	GO:0003824
BJN34_36270	long-chain fatty acid--CoA ligase	GO:0003824
BJN34_36310	3-octaprenyl-4-hydroxybenzoate carboxy-lyase	GO:0003824
BJN34_36410	hypothetical protein	GO:0003824
BJN34_36640	error-prone DNA polymerase	GO:0003824
BJN34_37380	chlorocatechol 1,2-dioxygenase	GO:0003824

## Sheet: GO_0003924
Locus	Description	GO
BJN34_11695	GTP-binding protein TypA	GO:0003924
BJN34_11755	translation initiation factor IF-2	GO:0003924
BJN34_13720	elongation factor 4	GO:0003924
BJN34_14615	ribosome small subunit-dependent GTPase A	GO:0003924
BJN34_16010	sulfate adenylyltransferase	GO:0003924
BJN34_17515	cell division protein FtsZ	GO:0003924
BJN34_18685	translation elongation factor Tu	GO:0003924
BJN34_18690	translation elongation factor G	GO:0003924
BJN34_18755	translation elongation factor Tu	GO:0003924
BJN34_20610	translation elongation factor G	GO:0003924
BJN34_32035	elongation factor G	GO:0003924
BJN34_35145	peptide chain release factor 3	GO:0003924

## Sheet: GO_0004519
Locus	Description	GO
BJN34_00240	hypothetical protein	GO:0004519
BJN34_01315	type I restriction endonuclease subunit R	GO:0004519
BJN34_0150	hypothetical protein	GO:0004519
BJN34_02995	group II intron reverse transcriptase/maturase	GO:0004519
BJN34_04800	group II intron reverse transcriptase/maturase	GO:0004519
BJN34_07620	group II intron reverse transcriptase/maturase	GO:0004519
BJN34_11955	group II intron reverse transcriptase/maturase	GO:0004519
BJN34_13565	group II intron reverse transcriptase/maturase	GO:0004519
BJN34_16265	group II intron reverse transcriptase/maturase	GO:0004519
BJN34_19675	group II intron reverse transcriptase/maturase	GO:0004519
BJN34_35880	toxin YoeB	GO:0004519

## Sheet: GO_0004812
Locus	Description	GO
BJN34_02790	aspartate--tRNA ligase	GO:0004812
BJN34_03030	tyrosine--tRNA ligase	GO:0004812
BJN34_03155	tryptophan--tRNA ligase	GO:0004812
BJN34_04305	serine--tRNA ligase	GO:0004812
BJN34_06155	lysine--tRNA ligase	GO:0004812
BJN34_06405	cysteine--tRNA ligase	GO:0004812
BJN34_06835	threonine--tRNA ligase	GO:0004812
BJN34_06855	phenylalanine--tRNA ligase subunit alpha	GO:0004812
BJN34_12055	histidine--tRNA ligase	GO:0004812
BJN34_12280	glutamate--tRNA ligase	GO:0004812
BJN34_14210	Ala-tRNA(Pro) hydrolase	GO:0004812
BJN34_14640	tRNA glutamyl-Q(34) synthetase GluQRS	GO:0004812
BJN34_14815	valine--tRNA ligase	GO:0004812
BJN34_14905	alanine--tRNA ligase	GO:0004812
BJN34_14980	glutamine--tRNA ligase	GO:0004812
BJN34_15755	methionine--tRNA ligase	GO:0004812
BJN34_16275	isoleucine--tRNA ligase	GO:0004812
BJN34_16745	leucine--tRNA ligase	GO:0004812
BJN34_17315	proline--tRNA ligase	GO:0004812

[truncated: 20 more sheets: GO_0005506, GO_0005525, GO_0005840, GO_0006412, GO_0006418, GO_0006725, GO_0006935, GO_0007165, GO_0008199, GO_0008410, GO_0015288, GO_0015833, GO_0016491, GO_0016616, GO_0016887, GO_0046872, GO_0051536, GO_0051537, GO_0055114, GO_0071973]
