# Supplementary material for: Transcriptome differences between Cupriavidus necator NH9 grown with 3-chlorobenzoate and that grown with benzoate
Source: Research Square preprint supplement (doi:10.21203/rs.3.rs-50641/v2), 2020-10-16
Supplement: Supplementary file 3 [file 2b79c301c86edee3fcb07022.xlsx]

## Sheet: TableS2
Table S2 All differential expression analysis results and TPM values		3-CB vs. CA					BA vs. CA					3-CB vs. BA					TPMa values
Locus	Description	logFCb, c	logCPMd	LRe	PValue	FDRf	logFCb, g	logCPMd	LRe	PValue	FDRf	logFCb, h	logCPMd	LRe	PValue	FDRf	3-CB_1	3-CB_2	3-CB_3	BA_1	BA_2	BA_3	CA_1	CA_2	CA_3
BJN34_00005	chromosomal replication initiation protein DnaA	-1.39439	7.46006	11.0693	0.000877667	0.00407414	-0.64714	7.46006	2.464	0.116482	0.331356	-0.747246	7.46006	3.2553	0.0711931	0.255154	37.9902	27.8723	75.1976	88.5909	93.2238	69.5088	112.153	88.7401	112.114
BJN34_00010	DNA polymerase III subunit beta	-1.15859	9.66	25.0629	5.55e-07	6.57e-06	-0.736279	9.66	10.2945	0.00133424	0.0133695	-0.422315	9.66	3.39896	0.0652375	0.241537	434.212	396.864	411.455	532.655	623.191	544.991	699.02	778.791	791.745
BJN34_00015	DNA gyrase subunit B	-0.801956	9.39594	11.3084	0.000771575	0.0036667	-0.505388	9.39594	4.53122	0.0332819	0.145758	-0.296568	9.39594	1.56182	0.211399	0.481331	163.855	178.069	182.055	221.489	237.423	201.023	209.797	283.621	260.29
BJN34_00020	phage Gp37/Gp68 family protein	-0.444546	6.61953	3.28153	0.0700636	0.151742	-0.277557	6.61953	1.28893	0.256245	0.53007	-0.16699	6.61953	0.464705	0.495433	0.730224	80.2399	125.337	88.6707	109.425	114.027	113.703	87.2248	123.977	117.463
BJN34_00025	hypothetical protein	-0.302992	7.51505	0.974217	0.323631	0.476022	-0.175334	7.51505	0.3271	0.567372	0.791395	-0.127657	7.51505	0.173368	0.677136	0.849672	119.72	132.884	88.8491	129.91	100.217	149.554	66.9747	171.129	108.399
BJN34_00030	hypothetical protein	0.128965	6.03078	0.17005	0.680067	0.791734	-0.00308469	6.03078	9.71e-05	0.992136	0.996309	0.13205	6.03078	0.179656	0.671669	0.84663	87.3845	101.854	45.7892	66.2722	61.2715	87.4949	41.9623	80.2701	50.6655
BJN34_00035	HNH endonuclease	0.770098	2.37729	2.88301	0.0895186	0.183816	0.175872	2.37729	0.138889	0.709388	0.874609	0.594226	2.37729	1.87673	0.170706	0.424406	7.85464	10.4829	4.06187	5.21715	4.29565	5.0092	1.39413	4.06775	4.72917
BJN34_00045	IS5 family transposase	N/A	N/A	N/A	N/A	N/A	N/A	N/A	N/A	N/A	N/A	N/A	N/A	N/A	N/A	N/A	1.10075	1.34016	0.027307	0.490629	0	0.388019	0.123543	0.681379	0.136552
BJN34_0005	hypothetical protein	-0.919439	3.00655	3.72583	0.0535771	0.123245	-0.497855	3.00655	1.14489	0.284622	0.560821	-0.421584	3.00655	0.77602	0.378361	0.646698	13.7572	13.1012	3.96546	10.4205	17.0894	14.4254	17.4527	20.3407	3.9084
BJN34_00050	DNA ligase	0.664198	1.58152	0.869215	0.351173	0.503366	0.388406	1.58152	0.291461	0.589286	0.804142	0.275793	1.58152	0.16574	0.683926	0.854013	3.71033	3.47631	3.63032	0.559308	2.29039	5.91848	2.65811	1.6495	0.705634
BJN34_00055	hypothetical protein	-0.273476	0.915391	0.0302731	0.861872	0.916823	1.05002	0.915391	0.454977	0.499981	0.749422	-1.32349	0.915391	0.721502	0.395652	0.660407	4.01202	0	0	4.86038	0.912028	3.9029	0	0	8.95236
BJN34_00060	DUF3696 domain-containing protein	0.108325	1.64628	0.019026	0.890292	0.93381	-0.92133	1.64628	1.25682	0.262254	0.537041	1.02966	1.64628	1.61871	0.203272	0.468848	1.95016	2.69045	1.31687	0.816029	0.409286	1.54315	2.13802	0	2.36353
BJN34_00065	hypothetical protein	0.242883	1.35038	0.12152	0.727392	0.827443	0.533987	1.35038	0.614409	0.433132	0.696962	-0.291105	1.35038	0.201251	0.653713	0.836501	2.81781	4.36876	1.79903	2.57292	4.59271	4.47592	4.37247	0.512942	1.02596
BJN34_00070	IS5 family transposase	N/A	N/A	N/A	N/A	N/A	N/A	N/A	N/A	N/A	N/A	N/A	N/A	N/A	N/A	N/A	0.545684	0.81999	0.112633	0.629244	0.251517	0.810011	0.742943	0.367979	0.409656
BJN34_00075	hypothetical protein	-0.268715	8.7761	1.41411	0.234375	0.378279	-0.141756	8.7761	0.39441	0.52999	0.768835	-0.126959	8.7761	0.316373	0.573795	0.78943	83.4533	85.3839	90.0869	96.8651	97.8956	95.8607	82.0778	91.8374	81.651
BJN34_00080	helicase SNF2	-0.218802	8.26236	1.04221	0.307309	0.459313	-0.0414048	8.26236	0.0374425	0.846567	0.939665	-0.177397	8.26236	0.687305	0.407083	0.670723	88.5571	85.0461	82.3264	95.0554	103.065	97.5333	78.071	84.996	79.7278
BJN34_00085	DEAD/DEAH box helicase	-0.201867	9.52027	0.789621	0.374215	0.527282	-0.0603231	9.52027	0.0706152	0.790443	0.910654	-0.141544	9.52027	0.38875	0.532957	0.759568	111.991	112.802	107.208	123.476	122.855	128.597	81.9736	128.021	104.405
BJN34_00090	DUF1778 domain-containing protein	-0.858171	5.33976	12.1258	0.000497302	0.00251705	-0.320449	5.33976	1.77206	0.183128	0.437384	-0.537722	5.33976	4.78165	0.0287645	0.144054	97.7901	87.7777	97.508	139.899	114.826	171.245	135.702	155.498	129.877
BJN34_00095	hypothetical protein	0.691804	3.14236	3.25251	0.0713142	0.153979	0.4989	3.14236	1.66416	0.197042	0.455229	0.192904	3.14236	0.284711	0.59363	0.80017	11.2151	15.0827	7.29287	8.75164	9.1299	11.5726	5.66904	6.97022	3.65747
BJN34_0010	D-glycero-beta-D-manno-heptose 1-phosphate adenylyltransferase	-0.246235	5.4709	1.25665	0.262287	0.410691	-0.14569	5.4709	0.444956	0.50474	0.752221	-0.100545	5.4709	0.212226	0.645029	0.83188	35.4529	37.5856	36.5922	40.4811	39.5951	40.636	32.7475	39.4899	34.3927
BJN34_00100	integrase	1.16232	4.67738	20.8926	4.86e-06	4.51e-05	1.20286	4.67738	22.5263	2.07e-06	5.72e-05	-0.0405437	4.67738	0.0307816	0.860728	0.945381	15.0122	13.6081	10.6273	15.4129	12.2045	13.2125	4.15282	5.39917	4.51697
BJN34_00105	transposition helper protein	0.872411	3.68861	5.91416	0.0150197	0.0436409	1.04735	3.68861	8.67301	0.00322957	0.0267482	-0.174937	3.68861	0.279055	0.597322	0.802683	12.7112	12.1568	11.1959	16.2678	15.2247	9.95347	3.45825	7.09545	5.37958
BJN34_00110	hypothetical protein	0.538287	4.58116	3.63287	0.0566492	0.128603	0.467229	4.58116	2.73549	0.0981412	0.296714	0.0710588	4.58116	0.0681287	0.794081	0.91207	10.7314	13.6642	12.4942	10.0768	13.0394	12.8787	6.17693	8.39063	6.20869
BJN34_00115	hypothetical protein	1.38707	2.89329	7.95381	0.00479861	0.0168146	1.04966	2.89329	4.46485	0.0345991	0.148718	0.337407	2.89329	0.559703	0.45438	0.705859	32.9129	22.2525	11.8282	19.5829	14.925	17.9527	4.00216	12.5562	3.63445
BJN34_00120	hypothetical protein	1.1393	3.07499	8.89825	0.00285444	0.0109194	0.917352	3.07499	5.64401	0.0175151	0.0922944	0.221947	3.07499	0.416443	0.518717	0.748709	18.0642	21.6084	12.6586	11.8718	17.7585	15.4293	7.2269	4.56693	6.33022
BJN34_00125	hypothetical protein	0.437279	3.53599	1.42114	0.233216	0.376934	-0.256282	3.53599	0.459895	0.497673	0.748095	0.693561	3.53599	3.59421	0.057981	0.223158	66.4764	81.639	45.0779	36.5408	46.8725	34.3303	31.0785	56.0025	27.5909
BJN34_00130	hypothetical protein	-0.0279994	4.81073	0.00599886	0.938264	0.966172	-0.0267356	4.81073	0.00547715	0.941004	0.977571	-0.00126381	4.81073	1.23e-05	0.997202	0.999512	31.8204	45.8906	13.0823	28.6137	30.6645	30.8048	23.7544	26.8163	22.2648
BJN34_00135	hypothetical protein	0.131604	5.60177	0.194281	0.659377	0.778303	-0.0147347	5.60177	0.00242695	0.960709	0.984744	0.146338	5.60177	0.243031	0.622025	0.819453	56.6418	53.28	23.7922	36.774	41.6591	41.9788	34.9974	30.0392	31.2798
BJN34_00140	hypothetical protein	N/A	N/A	N/A	N/A	N/A	N/A	N/A	N/A	N/A	N/A	N/A	N/A	N/A	N/A	N/A	3.26061	3.27137	4.67093	3.25949	4.29565	0.287884	0	1.30395	0
BJN34_00145	chromosome partitioning protein ParB	0.0214763	4.16332	0.00565744	0.940043	0.966862	-0.0686385	4.16332	0.0575072	0.81048	0.921351	0.0901148	4.16332	0.102366	0.749008	0.888398	19.1532	20.2683	12.5054	13.7868	19.1826	15.7307	11.5215	15.1169	14.4121
BJN34_0015	hypothetical protein	-0.737985	1.94653	1.75588	0.18514	0.317147	-0.727167	1.94653	1.71924	0.189791	0.446119	-0.0108178	1.94653	0.000355176	0.984964	0.99644	14.0428	11.5856	14.2518	15.6715	10.6676	19.6534	20.894	14.4803	7.45068
BJN34_00150	chromosome partitioning protein ParB	0.455975	3.62197	1.97848	0.159551	0.284139	0.20585	3.62197	0.394588	0.529898	0.768835	0.250126	3.62197	0.640393	0.423569	0.683544	15.0336	14.6326	9.99023	11.703	7.88732	14.5345	8.3895	7.23162	7.38603
BJN34_00155	recombinase family protein	0.48332	4.72909	1.95685	0.161851	0.287495	0.34622	4.72909	1.00206	0.316812	0.591521	0.1371	4.72909	0.163543	0.685915	0.854802	9.66106	21.2363	7.04254	15.902	8.43865	5.71224	6.97561	7.92216	9.75044
BJN34_00165	hypothetical protein	-0.892577	2.20672	2.61776	0.105674	0.208457	-0.0306027	2.20672	0.00346147	0.953084	0.981446	-0.861974	2.20672	2.52547	0.112021	0.331752	4.35502	6.32466	2.70639	11.0852	5.69105	8.62935	8.7803	8.85126	2.68947
BJN34_00170	hypothetical protein	-1.45136	3.60453	17.733	2.54e-05	0.00018944	-1.47544	3.60453	18.3767	1.81e-05	0.000392197	0.0240821	3.60453	0.00435813	0.947365	0.981822	26.5148	26.433	17.3431	34.7989	18.1243	17.678	55.4998	53.0052	48.5888
BJN34_00175	hypothetical protein	-0.562157	4.01443	1.63525	0.200979	0.336617	-0.551841	4.01443	1.57955	0.208825	0.470092	-0.0103153	4.01443	0.000546321	0.981352	0.994713	14.8889	19.3497	4.70815	11.3367	8.992	18.8704	14.2633	13.8661	16.9297
BJN34_00180	N-acetyltransferase	-0.244401	2.1255	0.179493	0.671809	0.787074	-0.731056	2.1255	1.52401	0.217014	0.481604	0.486655	2.1255	0.680029	0.409577	0.672887	10.1858	8.73751	1.87753	5.39753	3.20512	5.42183	5.49485	9.86736	3.63621
BJN34_00185	DUF350 domain-containing protein	0.0718069	3.41311	0.044066	0.833731	0.900024	0.461162	3.41311	1.91731	0.166154	0.409704	-0.389355	3.41311	1.43699	0.230627	0.504379	29.33	30.7741	24.4595	38.3617	39.9468	35.367	12.0698	27.6183	26.6437
BJN34_00190	hypothetical protein	-0.0191283	5.05081	0.00347004	0.953026	0.97364	0.0397422	5.05081	0.0150477	0.902369	0.963634	-0.0588704	5.05081	0.0333682	0.855057	0.943158	26.0799	43.5875	42.432	37.6828	38.1979	45.366	19.0928	38.4775	37.6834
BJN34_00195	glutathionylspermidine synthase	2.12026	5.13488	5.1018	0.023901	0.0638359	3.88159	5.13488	15.0268	0.000105998	0.00174745	-1.76132	5.13488	3.74698	0.0529029	0.21208	3.00127	2.34542	39.1894	56.1121	53.1388	63.2353	1.97093	3.05468	3.90406
BJN34_0020	hypothetical protein	0.55987	6.56738	5.37494	0.0204281	0.0564422	0.393917	6.56738	2.66005	0.102897	0.305909	0.165953	6.56738	0.48478	0.486265	0.725216	16.581	12.9793	17.3195	24.6627	18.0912	13.9976	77.2387	10.9787	94.9236
BJN34_00200	homospermidine synthase	-0.432132	6.10015	3.35345	0.0670644	0.146762	-0.319707	6.10015	1.84943	0.17385	0.422809	-0.112425	6.10015	0.227481	0.633398	0.82406	44.0258	40.4711	28.4431	40.9417	40.0846	42.4289	30.6325	41.542	51.8239
BJN34_00205	formimidoylglutamase	0.226264	4.16944	0.471327	0.492377	0.639029	0.457233	4.16944	1.96336	0.161155	0.403557	-0.230969	4.16944	0.524376	0.468981	0.715954	205.427	192.751	151.974	174.074	135.679	189.848	10.3901	132.303	11.4609
BJN34_00210	ABC transporter ATP-binding protein	-0.0531872	4.58165	0.0191166	0.890033	0.933725	0.108215	4.58165	0.0798703	0.777473	0.904411	-0.161402	4.58165	0.17933	0.67195	0.84663	19.2508	20.9322	33.8874	35.6717	30.4377	20.2369	21.2912	17.0705	25.3292
BJN34_00215	ABC transporter permease	0.174795	4.15099	0.371821	0.542013	0.681354	0.340417	4.15099	1.43932	0.230249	0.498046	-0.165622	4.15099	0.359558	0.548752	0.771327	22.6472	27.1907	17.103	28.4965	24.3372	22.9082	12.9807	14.7759	20.4955
BJN34_00220	glutamine ABC transporter substrate-binding protein	0.339314	5.4208	1.54352	0.214094	0.353877	0.0840177	5.4208	0.0938866	0.759293	0.896895	0.255296	5.4208	0.893048	0.344653	0.619355	67.1051	64.8367	37.5506	48.1163	50.5263	43.5894	37.0255	41.8407	28.2429
BJN34_00225	IclR family transcriptional regulator	1.31488	5.26346	17.6619	2.64e-05	0.000194984	0.566726	5.26346	3.25702	0.0711185	0.240116	0.748155	5.26346	6.08889	0.0136034	0.087946	73.034	72.4756	44.1773	38.3582	32.2052	43.2675	12.3094	18.9142	30.8749
BJN34_00230	isoprenylcysteine carboxyl methyltransferase	0.281219	4.09169	0.714278	0.398027	0.551409	0.381702	4.09169	1.33029	0.248753	0.52114	-0.100483	4.09169	0.0970112	0.755446	0.890434	24.6686	24.7065	18.334	27.7898	16.5707	29.6888	8.95679	15.7299	20.5564
BJN34_00235	nucleotide pyrophosphohydrolase	-0.40957	4.06901	1.93988	0.163681	0.290273	0.016512	4.06901	0.00332162	0.954041	0.981446	-0.426082	4.06901	2.1746	0.140306	0.378007	33.5006	38.7395	33.7345	49.3002	55.7148	39.4296	38.6401	39.5069	36.2179
BJN34_00240	hypothetical protein	-0.573057	4.72033	5.56726	0.0182994	0.051611	-0.217888	4.72033	0.840188	0.359343	0.632137	-0.355168	4.72033	2.16023	0.141624	0.379438	20.3028	21.6589	18.1489	26.6884	27.5004	24.0432	20.309	28.3391	24.2452
BJN34_00245	DUF2938 domain-containing protein	0.744025	2.9787	1.77389	0.182901	0.314792	1.46675	2.9787	7.10364	0.00769275	0.0510197	-0.722724	2.9787	1.92695	0.165092	0.415219	18.1895	12.22	4.31693	18.5744	26.2408	11.2512	5.25069	3.86046	6.84209
BJN34_0025	hypothetical protein	0.238665	2.08973	0.34479	0.557077	0.694616	-0.359644	2.08973	0.692837	0.405201	0.673131	0.59831	2.08973	2.15716	0.141906	0.379438	8.39803	57.319	35.0123	7.99584	5.67298	8.92707	6.59924	7.86427	8.79929
BJN34_00250	SAM-dependent methyltransferase	1.73378	3.31071	6.71706	0.0095495	0.0297975	2.59945	3.31071	14.964	0.000109583	0.00179799	-0.865673	3.31071	2.02851	0.154372	0.400476	9.5571	14.6276	2.43127	19.9471	18.6163	9.0107	1.19354	1.03842	3.7307
BJN34_00255	MerR family transcriptional regulator	0.753996	4.34464	5.59219	0.0180407	0.0510478	0.38456	4.34464	1.42835	0.232033	0.500635	0.369436	4.34464	1.43328	0.23123	0.504929	57.1038	13.9899	11.1921	38.5138	43.9635	33.2458	23.1024	31.2855	16.7503
BJN34_00260	cell filamentation protein Fic	-0.58094	6.23001	4.69038	0.030332	0.077958	-0.16167	6.23001	0.370015	0.542996	0.775813	-0.41927	6.23001	2.45839	0.116899	0.34109	46.9973	46.4514	42.8656	69.8583	52.3978	64.9555	41.8477	79.4742	46.4891
BJN34_00265	hypothetical protein	0.609942	6.05503	5.94724	0.0147403	0.0429554	0.512685	6.05503	4.2016	0.0403858	0.164958	0.0972569	6.05503	0.157241	0.691709	0.857276	72.1685	54.717	44.3492	58.9947	47.7256	55.4484	22.1843	39.198	29.8005
BJN34_00270	ATP-dependent exonuclease SbcCD, C subunit-like protein	0.531702	7.84342	2.90584	0.0882592	0.181751	0.37738	7.84342	1.46686	0.225842	0.490967	0.154322	7.84342	0.247228	0.619034	0.816573	69.0735	72.6233	64.2713	63.7461	59.3005	66.286	18.9072	52.809	47.1339
BJN34_00275	DUF4194 domain-containing protein	0.755095	5.82777	7.70249	0.00551448	0.0188188	0.373965	5.82777	1.88089	0.170233	0.416646	0.38113	5.82777	2.03274	0.153942	0.399913	117.604	89.5555	65.6585	68.1444	57.5639	86.0483	29.5018	50.1297	51.5455
BJN34_00280	DUF3375 domain-containing protein	-0.0652751	7.04346	0.087495	0.767386	0.855755	-0.24114	7.04346	1.1897	0.275389	0.551599	0.175865	7.04346	0.636112	0.425122	0.684705	89.2901	90.2201	64.6327	74.0138	59.2032	86.8071	61.8375	75.7261	69.2199
BJN34_00285	methyl-accepting chemotaxis protein	-2.6776	4.08855	28.5105	9.32e-08	1.29e-06	0.107823	4.08855	0.0599867	0.806517	0.919508	-2.78542	4.08855	31.0748	2.48e-08	8.73e-07	1.99259	0.306298	2.25121	9.19705	9.04002	17.2501	9.62541	7.56668	8.64344
BJN34_00290	DUF4382 domain-containing protein	-0.500821	6.68776	1.61444	0.203868	0.340141	-0.888922	6.68776	5.0186	0.0250764	0.118946	0.388101	6.68776	0.966175	0.325636	0.600266	102.131	90.8857	26.0783	45.0826	49.4979	70.4191	81.5531	78.5706	81.8806
BJN34_00295	DUF72 domain-containing protein	0.0915142	6.44441	0.107469	0.743044	0.838331	-0.297474	6.44441	1.12581	0.288671	0.56478	0.388988	6.44441	1.93888	0.16379	0.413086	107.134	117.78	59.2205	68.2707	61.7282	87.999	71.8521	57.5825	82.5907
BJN34_0030	GNAT family N-acetyltransferase	-0.296656	1.00175	0.0963713	0.756228	0.8471	-0.224029	1.00175	0.0556041	0.813584	0.922198	-0.072627	1.00175	0.00585933	0.938985	0.976939	13.5566	1.09046	77.4006	2.15831	1.02603	4.31827	3.06527	2.62916	1.09924
BJN34_00300	ATP-dependent RNA helicase DbpA	-0.205886	7.22225	0.944915	0.331017	0.482799	-0.172773	7.22225	0.66684	0.414155	0.680335	-0.033113	7.22225	0.0245443	0.875508	0.951047	94.6784	89.855	0	90.9809	82.2851	100.382	83.4496	78.8714	81.8245
BJN34_00305	DUF2855 domain-containing protein	0.480811	3.39308	1.37705	0.240604	0.385972	-0.1373	3.39308	0.10732	0.743217	0.889257	0.618112	3.39308	2.31817	0.127871	0.360745	5.89475	9.33338	6.69766	8.23477	5.33095	5.76389	6.54803	7.17812	2.85566
BJN34_00310	TetR family transcriptional regulator	0.249292	5.47426	0.592927	0.44129	0.58918	0.294961	5.47426	0.83189	0.361726	0.634074	-0.0456684	5.47426	0.0203469	0.886572	0.954237	60.6759	76.519	33.8579	56.9233	38.7604	83.0173	35.3064	42.4439	37.2399
BJN34_00315	histidine kinase	0.706087	8.27182	3.51858	0.0606845	0.135629	-0.107562	8.27182	0.0822248	0.774305	0.903029	0.813649	8.27182	4.66159	0.0308447	0.151294	1061.76	1057.93	472.02	523.5	347.695	609.862	237.148	655.469	395.068
BJN34_00320	aromatic ring-hydroxylating dioxygenase subunit alpha	-0.167624	6.25844	0.368409	0.543873	0.683196	0.154308	6.25844	0.315148	0.574538	0.795143	-0.321932	6.25844	1.37344	0.241222	0.51718	71.2921	47.2536	51.9717	61.2243	63.496	93.3112	38.1833	65.7677	53.2095
BJN34_00325	MFS transporter	-0.103493	5.34752	0.0510778	0.821198	0.891159	0.290522	5.34752	0.405179	0.524427	0.765416	-0.394015	5.34752	0.7467	0.387523	0.65508	16.5181	11.8796	31.5184	32.345	28.572	22.4515	24.2689	12.2724	16.7881
BJN34_00330	glutathione peroxidase	-0.115082	5.91605	0.251723	0.615865	0.743678	-0.160057	5.91605	0.486973	0.485281	0.739293	0.044975	5.91605	0.0387616	0.843922	0.937593	100.475	78.8563	71.7219	89.8247	82.7018	74.9287	75.4937	72.3519	71.478
BJN34_00335	glutathione transferase GstA	0.859369	2.95046	6.15511	0.0131033	0.039056	0.409647	2.95046	1.30784	0.252786	0.524982	0.449722	2.95046	1.95588	0.161954	0.410609	14.1969	13.6629	10.9904	11.9651	8.89161	7.77978	3.93189	6.68386	5.9692
BJN34_00340	Asp/Glu/hydantoin racemase	-0.556062	4.19158	3.67403	0.0552665	0.126498	-0.414778	4.19158	2.08666	0.148591	0.385334	-0.141283	4.19158	0.235253	0.627656	0.821695	22.4828	15.906	14.9434	18.4454	22.2445	19.0833	15.7202	22.3601	26.3311
BJN34_00345	serine hydrolase	-0.630687	2.33046	1.80906	0.178622	0.309515	-0.742199	2.33046	2.47808	0.115443	0.329077	0.111512	2.33046	0.0533553	0.817324	0.924698	4.82393	2.08105	1.28359	2.78193	3.07862	1.7605	3.26042	3.329	3.79235
BJN34_0035	hypothetical protein	-1.25577	4.92407	18.4722	1.72e-05	0.000135799	-0.658227	4.92407	5.37549	0.0204216	0.103894	-0.597542	4.92407	4.15475	0.041518	0.182869	87.8073	94.3059	108.024	94.7261	121.893	76.2054	77.0725	134.674	93.5215
BJN34_00350	MFS transporter	0.139455	2.13004	0.0677817	0.794594	0.872609	0.603996	2.13004	1.36362	0.242911	0.514978	-0.464541	2.13004	0.861404	0.353346	0.626843	1.88257	1.79712	3.00523	3.04634	4.43586	1.99192	1.1226	1.86709	2.03093
BJN34_00355	GntR family transcriptional regulator	-0.583011	6.72309	5.7182	0.0167899	0.0478409	-0.221979	6.72309	0.841706	0.358909	0.632016	-0.361033	6.72309	2.20462	0.137598	0.373913	58.7786	40.8649	41.5982	123.924	48.5037	140.167	93.0674	105.319	133.678
BJN34_00360	2-hydroxyhepta-2,4-diene-1,7-dioate isomerase	0.106582	7.17878	0.151161	0.697429	0.804804	0.1429	7.17878	0.272005	0.60199	0.812168	-0.0363187	7.17878	0.0176678	0.894256	0.956578	168.428	148.904	136.347	138.224	159.018	176.845	72.6172	161.218	113.904
BJN34_00365	amidohydrolase	0.323377	9.06412	1.00374	0.316408	0.468923	-0.370287	9.06412	1.31305	0.251843	0.524056	0.693664	9.06412	4.5841	0.0322698	0.156304	625.002	506.806	293.476	253.988	311.966	313.011	216.709	454.041	248.741
BJN34_00370	AraC family transcriptional regulator	0.00401969	4.62653	0.000179808	0.989301	0.994183	-0.249568	4.62653	0.682197	0.408831	0.676859	0.253588	4.62653	0.718115	0.396763	0.661494	35.7756	24.6724	16.6544	21.6357	16.6705	27.0238	20.6146	22.1511	18.5402
BJN34_00375	MFS transporter	-0.953547	5.058	8.55807	0.00343994	0.0127506	-0.833874	5.058	6.61911	0.010089	0.0620945	-0.119673	5.058	0.133564	0.714765	0.870023	23.4638	12.6338	15.7921	16.2248	22.3748	18.419	30.49	20.6986	29.5464
BJN34_00380	MarR family transcriptional regulator	-0.135143	4.73277	0.24123	0.623319	0.749933	0.413511	4.73277	2.35812	0.124632	0.343849	-0.548653	4.73277	4.19504	0.0405424	0.180451	34.9294	35.0654	33.4372	57.4784	37.175	61.1818	26.5716	38.0401	27.8346
BJN34_00385	ABC transporter permease	0.143655	3.27087	0.0830272	0.773236	0.859786	0.245442	3.27087	0.245076	0.620563	0.824368	-0.101787	3.27087	0.0433143	0.835135	0.932553	5.41653	7.06665	12.266	8.19999	8.94564	10.8358	2.62285	9.57283	7.13893
BJN34_00390	hypothetical protein	0.573363	3.24004	2.92275	0.0873388	0.180419	0.940182	3.24004	8.35973	0.00383629	0.0306372	-0.366819	3.24004	1.49985	0.220695	0.493915	24.2347	31.6311	18.9185	31.4745	30.1447	37.4306	12.2108	12.7808	15.2086
BJN34_00395	ABC transporter substrate-binding protein	0.0653358	4.62123	0.0602373	0.806121	0.880747	-0.0851855	4.62123	0.101467	0.750076	0.893132	0.150521	4.62123	0.326712	0.567602	0.786161	24.6115	27.4385	15.3732	18.3365	22.6737	20.1397	15.7783	17.3124	18.7461
BJN34_0040	DUF3562 domain-containing protein	-3.02286	1.55918	15.305	9.15e-05	0.000580019	-1.60914	1.55918	5.6233	0.0177233	0.0931785	-1.41372	1.55918	2.9371	0.0865658	0.285964	3.36279	2.82973	16.8003	4.17579	4.16419	4.9782	25.4518	19.8795	2.81691
BJN34_00400	two-component system response regulator	0.934107	3.7503	6.46959	0.0109736	0.0334867	-0.719227	3.7503	3.35472	0.0670127	0.230043	1.65333	3.7503	19.1409	1.21e-05	0.00030907	31.7442	32.7836	0	11.72	8.18173	5.54971	8.16206	11.4236	14.5403
BJN34_00405	DNA-binding response regulator	1.37838	1.43015	1.32587	0.249542	0.396815	1.42761	1.43015	1.42236	0.233016	0.501991	-0.0492311	1.43015	0.00190088	0.965224	0.988356	6.01812	2.41164	0.670147	9.12567	6.41506	0.702158	0	0	6.16927
BJN34_00410	sensor histidine kinase	-0.275707	1.00537	0.119865	0.729181	0.828223	0.0710777	1.00537	0.00856348	0.92627	0.972221	-0.346785	1.00537	0.203487	0.65192	0.835739	1.17455	1.23673	1.29299	1.70922	0.965677	2.49726	2.26523	1.24059	0
BJN34_00415	porin	-1.17902	12.8473	17.278	3.23e-05	0.00023265	-1.46135	12.8473	26.1774	3.11e-07	1.05e-05	0.282334	12.8473	1.01593	0.313487	0.590302	4670.42	4938.54	3501.85	3271.96	4674.76	2861.78	6558.4	9397.11	8182.65
BJN34_00420	cell division topological specificity factor MinE	-0.388964	6.35896	2.77312	0.0958593	0.193903	-0.402882	6.35896	2.97956	0.0843224	0.267943	0.0139187	6.35896	0.00354879	0.952497	0.983314	279.546	215.895	263.667	291.34	236.9	244.316	241.709	271.715	302.373
BJN34_00425	septum site-determining protein MinD	-0.426457	7.98977	3.36473	0.0666066	0.145944	-0.226286	7.98977	0.952375	0.329116	0.602588	-0.20017	7.98977	0.743935	0.388403	0.655848	226.746	218.489	248.517	259.425	295.915	263.804	229.238	258.447	280.823
BJN34_00430	septum site-determining protein MinC	-0.419761	7.13077	2.98577	0.0839991	0.17492	-0.141344	7.13077	0.34152	0.558953	0.785826	-0.278418	7.13077	1.32012	0.250571	0.527341	123.994	131.99	123.141	170.138	143.068	159.133	152.261	113.123	145.059
BJN34_00435	magnesium transporter	0.064368	6.29182	0.0737346	0.785975	0.866851	-0.0516715	6.29182	0.0474247	0.827607	0.929497	0.116039	6.29182	0.241843	0.622878	0.819672	78.8875	76.8688	63.5104	66.6726	62.2104	77.441	38.4147	68.9175	64.894
BJN34_00440	sel1 repeat family protein	0.42189	3.60843	0.978818	0.322491	0.475078	0.250924	3.60843	0.343744	0.557676	0.784827	0.170966	3.60843	0.168113	0.681795	0.852941	19.5996	20.0127	9.97064	22.3322	9.15023	12.5493	5.37517	11.258	13.0844
BJN34_00445	aspartyl/glutamyl-tRNA amidotransferase subunit B	-0.811279	7.85128	12.4095	0.000427148	0.00221375	-0.643809	7.85128	7.87277	0.00501848	0.037606	-0.167469	7.85128	0.532667	0.465488	0.712274	106.232	105.373	107.417	129.273	131.717	105.423	137.779	151.689	169.659
BJN34_0045	hypothetical protein	0.347108	4.14963	0.622314	0.430189	0.579455	-0.00535275	4.14963	0.000146645	0.990338	0.994936	0.35246	4.14963	0.65188	0.419441	0.68229	38.6588	42.1789	108.487	49.7149	49.1967	68.9484	40.7324	52.076	41.3208
BJN34_00450	dienelactone hydrolase	-0.848906	5.6091	9.43781	0.00212557	0.00853681	-0.199222	5.6091	0.541114	0.461971	0.720648	-0.649684	5.6091	5.57432	0.0182257	0.105703	27.3289	23.5563	27.5543	47.7656	44.8927	33.6628	42.8873	34.4448	37.8194
BJN34_00455	hypothetical protein	-0.904203	5.49738	8.96435	0.00275298	0.0106131	-0.466719	5.49738	2.45883	0.116866	0.332311	-0.437484	5.49738	2.10581	0.14674	0.388985	53.9057	54.8505	72.5642	83.0583	86.2687	69.134	85.8685	83.6724	93.5819
BJN34_00460	aspartyl/glutamyl-tRNA amidotransferase subunit A	-1.26943	7.49548	15.1987	9.68e-05	0.000607463	-0.74688	7.49548	5.39181	0.0202315	0.103154	-0.522553	7.49548	2.62966	0.104884	0.320201	55.5655	53.3731	80.8037	91.2133	114.963	75.9397	127.411	106.342	145.582
BJN34_00465	asparaginyl/glutamyl-tRNA amidotransferase subunit C	-1.27926	5.17921	10.7998	0.00101513	0.00461205	-0.692396	5.17921	3.28891	0.0697493	0.236853	-0.586862	5.17921	2.29537	0.12976	0.362633	58.1113	55.8082	73.0643	103.223	108.502	78.6271	159.721	68.6898	140.609
BJN34_00470	rod shape-determining protein	-1.48321	8.69053	18.1106	2.08e-05	0.000159474	-0.517258	8.69053	2.2918	0.130059	0.353639	-0.965953	8.69053	7.85647	0.0050639	0.0446258	149.018	149.616	229.27	340.297	414.63	318.493	444.064	289.469	488.443
BJN34_00475	rod shape-determining protein MreC	-1.6756	6.29052	25.0782	5.51e-07	6.53e-06	-0.50383	6.29052	2.42886	0.11912	0.336098	-1.17177	6.29052	12.5002	0.0004069	0.00668378	34.3684	24.9466	37.7087	77.5596	84.9431	62.7706	93.0293	59.1423	102.011
BJN34_00480	rod shape-determining protein MreD	-1.00234	4.44439	6.56209	0.0104174	0.0320721	-0.177078	4.44439	0.216887	0.641422	0.838438	-0.825258	4.44439	4.49387	0.0340166	0.161567	26.2257	15.0013	25.4729	41.9624	44.2636	35.6859	45.6419	22.3572	40.7263
BJN34_00485	penicillin-binding protein 2	-0.88589	6.5355	13.8874	0.0001941	0.00111346	-0.183876	6.5355	0.619606	0.431194	0.695131	-0.702014	6.5355	8.78809	0.00303204	0.0304258	24.3474	23.4885	22.2938	40.8144	41.6425	33.745	34.0469	31.0996	40.2042
BJN34_00490	rod shape-determining protein RodA	-0.991139	5.66877	16.5828	4.66e-05	0.00032279	-0.514129	5.66877	4.63923	0.0312489	0.139054	-0.47701	5.66877	3.83767	0.0501132	0.204481	29.3223	22.2526	26.6395	36.0979	38.2104	37.7711	32.9937	45.4232	50.3784
BJN34_00495	DUF484 domain-containing protein	-0.856154	6.58101	12.4306	0.000422346	0.00219709	-0.144841	6.58101	0.367876	0.544164	0.776065	-0.711313	6.58101	8.64627	0.00327732	0.0320511	80.1309	74.8178	87.4818	147.029	109.18	155.795	117.659	113.818	128.829
BJN34_0050	hypothetical protein	1.30378	5.70945	24.2533	8.45e-07	9.67e-06	1.00865	5.70945	14.5052	0.000139773	0.00216024	0.295136	5.70945	1.36477	0.242713	0.518526	30.4785	36.3787	30.1909	46.7701	33.1246	45.9172	23.0855	27.23	25.5912
BJN34_00500	recombinase XerC	-0.55417	5.51831	6.20667	0.012727	0.0380985	0.0322286	5.51831	0.0219996	0.882088	0.955711	-0.586399	5.51831	7.10426	0.0076901	0.0598439	27.0716	30.9907	24.3459	45.3224	34.6107	46.9014	30.9079	35.0497	32.4354
BJN34_00505	transcriptional regulator GcvA	-0.212064	5.36183	0.688713	0.406602	0.559619	0.123707	5.36183	0.239516	0.624556	0.826462	-0.335771	5.36183	1.76946	0.183449	0.442525	85.7922	93.3785	54.898	55.2814	54.5641	83.1769	32.9559	32.5765	25.3323
BJN34_00510	DUF2917 domain-containing protein	-0.660665	5.34165	6.8581	0.00882402	0.0279472	-0.150746	5.34165	0.37151	0.542182	0.775795	-0.50992	5.34165	4.13155	0.0420909	0.183563	78.8201	57.0514	75.0297	103.288	103.642	102.197	87.1811	83.0674	103.287
BJN34_00515	lipoate--protein ligase	-0.265321	7.29094	0.817017	0.366054	0.518845	-0.142195	7.29094	0.235338	0.627594	0.827663	-0.123126	7.29094	0.176516	0.674384	0.847601	191.016	153.15	148.682	203.566	162.028	182.863	203.893	112.371	156.265
BJN34_00520	lipoyl synthase	-0.54903	8.15634	3.34159	0.0675492	0.14742	-0.485441	8.15634	2.61766	0.10568	0.311746	-0.0635893	8.15634	0.0450421	0.831927	0.931177	216.766	190.53	228.336	225.656	235.155	222.469	322.058	183.352	245.212
BJN34_00525	type II toxin-antitoxin system RelE/ParE family toxin	-0.769436	4.10562	5.98715	0.0144105	0.0422968	-0.950689	4.10562	8.99929	0.00270084	0.0231443	0.181252	4.10562	0.315241	0.574482	0.78943	45.1319	40.8726	31.4743	35.8589	42.5758	25.4334	49.7293	67.4053	44.4656
BJN34_00530	CopG family transcriptional regulator	-0.45571	4.5231	1.99391	0.157933	0.282273	-0.603264	4.5231	3.46478	0.0626889	0.220558	0.147553	4.5231	0.205611	0.65023	0.834698	68.67	73.7854	51.0719	67.7095	66.8331	41.0222	57.8294	100.762	58.5756
BJN34_00535	allophanate hydrolase	-0.0339896	4.98254	0.00733218	0.931762	0.961765	0.0467354	4.98254	0.0139191	0.906084	0.965189	-0.080725	4.98254	0.0418886	0.837832	0.934377	43.922	48.0652	31.0479	52.5857	31.6801	48.2483	52.0858	21.9687	24.4386
BJN34_00540	allophanate hydrolase	0.269185	4.66854	0.362038	0.547377	0.686185	0.120094	4.66854	0.0719308	0.788546	0.909376	0.149091	4.66854	0.11288	0.736889	0.881757	24.8772	31.9225	14.113	20.99	13.7111	30.4949	23.8498	11.2687	10.1046
BJN34_00545	LamB/YcsF family protein	0.847926	3.7847	3.94516	0.0470063	0.111196	-0.0771468	3.7847	0.0313238	0.85952	0.944354	0.925073	3.7847	4.77368	0.0288981	0.144365	27.9222	26.3288	13.5267	16.5679	8.11741	11.0166	6.9849	16.5123	6.68859
BJN34_0055	class I SAM-dependent methyltransferase	0.579646	4.16592	2.00538	0.156742	0.28082	0.691315	4.16592	2.86573	0.0904845	0.280822	-0.111669	4.16592	0.0790876	0.778538	0.903302	14.9716	12.3104	11.4481	13.3466	15.3324	10.2222	7.39846	9.16395	5.79973
BJN34_00550	DUF969 domain-containing protein	0.348625	2.97195	0.738613	0.390106	0.544136	0.596227	2.97195	2.23703	0.134739	0.360625	-0.247601	2.97195	0.422344	0.51577	0.74758	11.6198	5.56518	8.08198	9.20097	11.9631	9.53531	3.59747	6.60962	6.07709
BJN34_00555	permease	0.681054	3.69516	3.79791	0.0513167	0.119029	0.674901	3.69516	3.74313	0.053025	0.196773	0.00615249	3.69516	0.000348104	0.985114	0.99644	40.7784	35.1347	13.9328	31.1049	30.1635	34.5218	4.52096	20.8116	19.4862
BJN34_00560	pyroglutamyl-peptidase I	0.523996	3.75184	2.37735	0.123106	0.234237	0.39495	3.75184	1.343	0.246506	0.518471	0.129045	3.75184	0.15655	0.692353	0.85773	23.418	15.0138	19.9094	22.5283	12.3767	20.5632	9.10572	11.4745	12.2115
BJN34_00565	teicoplanin resistance protein VanZ	0.228458	5.97849	0.806559	0.369139	0.521617	0.181014	5.97849	0.506722	0.476562	0.731873	0.047444	5.97849	0.035497	0.850558	0.940158	49.9001	44.4726	44.1273	48.7427	33.8122	55.4116	25.3982	41.2343	30.4912
BJN34_00570	ABC transporter	0.808631	5.71625	7.36038	0.00666768	0.0220789	0.458502	5.71625	2.36184	0.124335	0.343724	0.350128	5.71625	1.43228	0.231393	0.504936	117.812	79.3772	75.0687	79.6856	55.3558	82.2543	25.8158	57.8962	43.5038
BJN34_00575	ABC transporter permease	0.40578	6.34603	2.03485	0.153729	0.277193	0.0704677	6.34603	0.0611664	0.804662	0.918023	0.335312	6.34603	1.40409	0.236041	0.511956	96.9302	102.275	68.0846	75.9243	56.1168	83.4142	34.0814	76.7753	54.3144
BJN34_00580	ABC transporter ATP-binding protein	0.494029	6.79009	3.00032	0.0832478	0.173912	0.550543	6.79009	3.72826	0.0534992	0.197726	-0.0565134	6.79009	0.0400523	0.841378	0.93612	122.134	143.21	106.623	131.168	97.9967	167.879	49.6949	100.59	66.8598
BJN34_00585	ABC transporter permease	-0.35084	7.30893	2.0472	0.152487	0.275814	-0.0786302	7.30893	0.103588	0.747566	0.892486	-0.27221	7.30893	1.23793	0.26587	0.542779	97.6251	100.047	114.633	131.085	105.776	154.521	88.0543	120.884	120.998
BJN34_00590	biotin--[acetyl-CoA-carboxylase] ligase	-0.151103	6.3436	0.38999	0.532305	0.672529	-0.0253678	6.3436	0.0110573	0.916254	0.969444	-0.125735	6.3436	0.27252	0.601646	0.804854	78.0977	75.3696	72.8659	85.2144	80.7887	86.5831	46.5912	74.0146	87.1897
BJN34_00595	pantothenate kinase	0.194734	5.34336	0.587227	0.443494	0.590839	0.113431	5.34336	0.198963	0.655559	0.846755	0.0813028	5.34336	0.105104	0.745789	0.886877	55.8863	40.855	36.1818	43.0899	41.7949	42.6029	22.6663	40.8985	31.4578
BJN34_0060	hypothetical protein	-0.30414	2.13787	0.301023	0.583242	0.718059	-0.233285	2.13787	0.179758	0.671581	0.854125	-0.0708547	2.13787	0.0165309	0.897696	0.957089	4.75128	6.06576	3.9119	9.38205	2.47387	4.83291	3.35051	3.67917	8.28551
BJN34_00600	hypothetical protein	-0.177895	3.0837	0.155087	0.693721	0.802422	-0.0118526	3.0837	0.000702724	0.978851	0.990256	-0.166043	3.0837	0.139002	0.709275	0.867519	29.3393	25.6491	24.503	45.1766	19.4893	27.9913	15.398	18.5489	41.8801
BJN34_00615	ferritin	-0.757654	8.20918	4.03446	0.0445798	0.106585	-0.349092	8.20918	0.865574	0.352184	0.626708	-0.408563	8.20918	1.18222	0.276905	0.554931	162.871	153.646	328.205	362.822	292.609	251.915	281.532	274.412	367.288
BJN34_00620	Patatin	-0.172978	6.80313	0.54764	0.459284	0.606421	0.235957	6.80313	1.02976	0.310215	0.587022	-0.408935	6.80313	3.09437	0.0785637	0.270097	63.9506	67.1135	65.7929	95.3294	84.7158	88.3144	45.2451	75.4848	62.6638
BJN34_00625	hypothetical protein	-0.400378	7.08117	3.33185	0.0679506	0.148186	-0.0441886	7.08117	0.0410748	0.839394	0.935659	-0.35619	7.08117	2.65407	0.103285	0.317137	134.523	130.974	114.275	167.196	149.557	180.352	102.537	149.474	159.662
BJN34_00630	enoyl-CoA hydratase	-0.222136	6.5621	0.90478	0.341503	0.493544	-0.0958654	6.5621	0.169449	0.680602	0.857101	-0.126271	6.5621	0.294394	0.587418	0.796414	111.263	90.6718	72.1849	117.89	91.7631	93.6475	71.8376	83.527	103.924
BJN34_00635	fumarylacetoacetate hydrolase	-0.267629	6.61055	1.28631	0.256728	0.403807	-0.0959376	6.61055	0.166468	0.68327	0.858458	-0.171691	6.61055	0.533019	0.46534	0.712242	77.3808	84.6756	71.4344	82.6524	94.235	91.3836	68.4355	65.6708	95.3938
BJN34_00640	IclR family transcriptional regulator	-0.508057	5.32953	3.68473	0.054913	0.125893	-0.134795	5.32953	0.266324	0.605809	0.814805	-0.373262	5.32953	2.01144	0.156117	0.40259	37.8797	28.5182	33.4496	44.119	46.3166	41.8034	44.0027	36.6305	34.349
BJN34_00645	DUF3108 domain-containing protein	0.915026	5.09433	12.0769	0.000510508	0.00257448	0.226918	5.09433	0.720998	0.395817	0.666309	0.688108	5.09433	7.1588	0.00745973	0.058573	44.2775	52.3662	26.4129	27.2631	23.1812	26.007	15.7369	18.9763	17.2712
BJN34_0065	hypothetical protein	2.15519	5.26768	30.4261	3.47e-08	5.37e-07	0.261178	5.26768	0.451652	0.501551	0.750376	1.89401	5.26768	24.4514	7.62e-07	2.2e-05	424.054	377.84	186.248	135.384	1358.92	1009.36	37.8771	649.193	390.6
BJN34_00650	3-oxoadipate enol-lactonase	1.3473	6.18371	10.697	0.00107309	0.00482161	0.466938	6.18371	1.30873	0.252625	0.524965	0.880362	6.18371	4.7085	0.0300139	0.148123	130.403	165.69	59.9701	60.6816	52.4082	80.2553	18.97	60.0829	33.9322
BJN34_00655	DUF3567 domain-containing protein	0.771229	7.83766	3.16386	0.0752849	0.160441	1.15365	7.83766	6.99119	0.00819119	0.053455	-0.382416	7.83766	0.78905	0.374388	0.643081	917.141	955.289	576.55	818.472	59.258	71.2119	147.095	72.4197	67.0206
BJN34_00660	sulfurtransferase	-0.683221	6.30472	6.93171	0.00846807	0.0269701	-0.297254	6.30472	1.33753	0.24747	0.519928	-0.385967	6.30472	2.22346	0.135928	0.371424	154.485	111.432	134.419	198.201	154.048	186.127	128.297	228.79	174.187
BJN34_00665	5-methyltetrahydrofolate--homocysteine methyltransferase	-1.51739	6.6074	19.4053	1.06e-05	9.04e-05	-0.70631	6.6074	4.39807	0.0359797	0.153307	-0.811083	6.6074	5.67199	0.0172379	0.1021	33.9979	37.2111	53.6202	76.0498	81.2601	70.9661	117.085	69.1916	108.157
BJN34_00670	methionine synthase	-1.18914	8.29881	19.1611	1.2e-05	0.0001	-0.629525	8.29881	5.49696	0.0190495	0.0985792	-0.559613	8.29881	4.3213	0.0376381	0.172529	60.8852	55.0264	70.8666	91.2757	112.124	79.6913	112.89	117.442	120.725
BJN34_00675	hypothetical protein	-0.266375	6.90781	0.349803	0.554224	0.692525	-0.323875	6.90781	0.516707	0.47225	0.728458	0.0575001	6.90781	0.016323	0.898338	0.957379	411.347	290.977	91.8038	165.916	231.06	354.125	265.435	198.375	277.617
BJN34_00680	DNA-binding response regulator	0.278971	5.84853	1.25237	0.263101	0.4115	0.0840568	5.84853	0.113209	0.73652	0.886695	0.194914	5.84853	0.622955	0.429951	0.687525	102.013	82.3084	78.8966	81.7649	60.2664	93.5094	43.4452	72.7826	61.688
BJN34_00685	two-component system response regulator	0.602824	4.62789	3.31874	0.0684944	0.149137	0.0217458	4.62789	0.00422126	0.948197	0.979931	0.581078	4.62789	3.15579	0.075658	0.264841	82.7672	76.161	44.2768	44.7899	27.6586	65.1805	28.6332	39.1185	39.0812
BJN34_00690	histidine kinase	-0.336829	6.03055	2.26417	0.132397	0.247962	-0.0473943	6.03055	0.045588	0.830926	0.931157	-0.289435	6.03055	1.69258	0.193261	0.455678	38.363	37.6907	28.4107	46.8004	39.5118	43.6453	27.2469	37.3644	43.2881
BJN34_00695	DUF1328 domain-containing protein	0.0433807	3.13594	0.0159158	0.899607	0.940208	0.527127	3.13594	2.55343	0.110055	0.319626	-0.483746	3.13594	2.28123	0.130948	0.363994	31.6382	19.1505	22.9402	41.698	31.1523	34.3372	17.3472	20.0858	21.2399
BJN34_0070	hypothetical protein	0.256332	2.61053	0.158698	0.690359	0.800141	-0.879562	2.61053	1.73355	0.187958	0.444929	1.13589	2.61053	2.95834	0.0854358	0.283993	633.273	518.996	449.837	441.888	7.46037	527.276	7.12485	375.003	254.799
BJN34_00700	DUF883 domain-containing protein	0.214121	4.31999	0.424836	0.514534	0.658771	0.361469	4.31999	1.22502	0.268377	0.543982	-0.147349	4.31999	0.211725	0.645418	0.83188	35.5365	53.6028	31.0268	38.1701	48.599	47.7043	17.2856	28.7828	38.0373
BJN34_00705	DUF1840 domain-containing protein	0.644051	7.33775	6.66598	0.00982704	0.030526	0.403436	7.33775	2.62071	0.105478	0.311573	0.240614	7.33775	0.947748	0.330293	0.604648	37.3104	45.8318	11.6994	21.6335	410.607	12.8216	207.076	15.9588	40.8982
BJN34_00710	arginine--tRNA ligase	-1.09063	7.87325	14.6945	0.000126413	0.000759015	-0.792046	7.87325	7.8561	0.00506496	0.0378315	-0.29858	7.87325	1.11963	0.289997	0.566436	71.3901	65.4021	94.868	103.151	102.565	90.0423	141.525	117.247	148.515
BJN34_00715	cell division protein FtsN	-0.931368	7.72639	16.5268	4.8e-05	0.00033065	-0.351053	7.72639	2.40137	0.121229	0.339559	-0.580315	7.72639	6.4722	0.0109575	0.0767136	177.768	170.333	164.668	265.515	280.358	236.324	255.787	241.028	300.343
BJN34_00720	disulfide bond formation protein DsbA	-0.295765	8.7345	1.13216	0.287316	0.437609	0.0309571	8.7345	0.0124437	0.911179	0.967936	-0.326722	8.7345	1.38319	0.239559	0.515081	597.22	603.31	339.21	487.827	753.982	686.165	465.258	470.288	578.285
BJN34_00725	short-chain dehydrogenase	-0.257418	6.09269	1.1385	0.28597	0.436136	-0.127343	6.09269	0.280701	0.596242	0.808693	-0.130075	6.09269	0.293046	0.588275	0.797107	79.2638	62.0494	59.287	71.0781	83.0833	68.8484	61.3247	57.3004	76.1616
BJN34_00730	cobalamin-binding protein	0.423462	5.59334	2.31701	0.127966	0.241559	0.143879	5.59334	0.265768	0.606185	0.814852	0.279582	5.59334	1.03209	0.309669	0.587277	74.0522	58.7603	43.7561	57.255	46.726	42.6691	24.4594	48.6952	33.9188
BJN34_00735	Zn-dependent hydrolase	-0.992176	7.68156	12.417	0.000425446	0.0022088	-0.415553	7.68156	2.22495	0.135797	0.362755	-0.576623	7.68156	4.23968	0.0394897	0.177979	117.81	104.14	110.33	115.728	201.87	188.006	177.75	197.634	164.447
BJN34_00740	MerR family transcriptional regulator	-1.38424	5.81174	11.1567	0.000837298	0.00393314	-0.0985736	5.81174	0.0599432	0.806586	0.919508	-1.28567	5.81174	9.68903	0.00185371	0.0213208	29.2714	38.7143	80.7335	148.794	115.494	123.623	84.4196	140.08	109.392
BJN34_00745	PaaI family thioesterase	-0.697068	5.37932	8.50964	0.00353269	0.0130247	-0.263313	5.37932	1.26099	0.261463	0.536821	-0.433754	5.37932	3.31548	0.0686303	0.248924	53.7358	54.9097	60.0602	73.7702	72.4116	89.4435	69.3681	85.2541	70.2849
BJN34_0075	hypothetical protein	-0.361035	4.65486	1.56809	0.210485	0.349328	-0.37813	4.65486	1.72426	0.189145	0.44576	0.0170946	4.65486	0.0035034	0.952801	0.983335	79.4057	113.417	73.3646	71.528	91.2786	94.4262	64.9537	75.9099	84.4215
BJN34_00750	acyl-CoA dehydrogenase	0.170798	7.85253	0.444298	0.505055	0.650605	0.230083	7.85253	0.806758	0.369081	0.64048	-0.0592858	7.85253	0.0538533	0.816489	0.924508	175.842	185.754	162.022	179.486	171.676	207.303	80.0007	167.404	137.828
BJN34_00755	bifunctional isocitrate dehydrogenase kinase/phosphatase	0.569383	7.58256	6.19889	0.0127831	0.0382498	0.412307	7.58256	3.25474	0.0712172	0.240221	0.157076	7.58256	0.480087	0.488383	0.725711	114.668	103.445	91.7664	97.1283	88.5031	106.702	44.7714	121.987	55.5472
BJN34_00760	carbonic anhydrase	0.315943	6.76841	1.86007	0.172617	0.302123	0.0305965	6.76841	0.0173758	0.895129	0.960287	0.285347	6.76841	1.53247	0.215742	0.488289	175.7	182.133	130.344	130.212	123.303	153.165	77.237	130.694	111.688
BJN34_00765	acetyl-CoA acetyltransferase	0.296921	8.32238	1.7436	0.186684	0.319081	0.00722957	8.32238	0.00103331	0.974356	0.988833	0.289691	8.32238	1.66521	0.196901	0.459657	284.003	274.611	251.597	227.841	222.724	226.121	131.958	218.534	192.425
BJN34_00770	short chain dehydrogenase	0.595488	6.48162	7.58085	0.00589915	0.0199053	0.392005	6.48162	3.27917	0.0701642	0.23768	0.203483	6.48162	0.915427	0.338679	0.61317	135.01	137.488	131.483	115.715	113.209	130.788	58.9252	84.0312	76.5651
BJN34_00775	acyl-CoA dehydrogenase	0.361915	6.90996	2.25154	0.133481	0.249172	0.276633	6.90996	1.31582	0.251344	0.523656	0.085282	6.90996	0.127009	0.721554	0.873128	117.224	102.142	87.8709	88.2377	97.2884	108.819	44.6762	74.718	76.9168
BJN34_00780	2-hydroxychromene-2-carboxylate isomerase	0.356289	7.28032	2.58158	0.108113	0.212392	0.0413712	7.28032	0.0347165	0.852191	0.941165	0.314918	7.28032	2.0336	0.153856	0.399913	269.568	260.53	193.49	201.008	180.508	209.239	131.202	189.089	137.964
BJN34_00785	HAD family hydrolase	0.509585	7.32315	5.46062	0.0194498	0.0542151	0.360499	7.32315	2.73396	0.0982352	0.296714	0.149086	7.32315	0.476323	0.490093	0.72695	270.061	253.082	185.459	215.357	202.29	229.524	111.742	162.023	129.893
BJN34_00790	hypothetical protein	0.461379	5.8824	3.86643	0.0492611	0.115075	0.298422	5.8824	1.61247	0.204145	0.46405	0.162957	5.8824	0.499123	0.479886	0.720884	151.16	147.557	104.797	122.157	101.319	143.674	58.9411	88.7303	90.7532
BJN34_00795	glutathione S-transferase	0.881532	6.85952	9.88231	0.00166875	0.00696049	0.515757	6.85952	3.39654	0.0653335	0.227278	0.365775	6.85952	1.74873	0.186036	0.446178	219.191	231.249	136.198	177.189	124.176	159.151	67.9321	118.798	70.3111
BJN34_0080	hypothetical protein	0.279481	4.99374	0.357337	0.549989	0.688381	-1.19495	4.99374	6.18457	0.0128869	0.0738648	1.47443	4.99374	9.39849	0.00217165	0.0240584	78.5648	71.0848	59.7048	75.056	67.6096	73.0679	70.3618	42.7609	86.1524
BJN34_00800	methylcrotonoyl-CoA carboxylase	0.879578	8.05307	12.5852	0.000388816	0.00205509	0.552681	8.05307	5.00007	0.0253463	0.119794	0.326897	8.05307	1.77637	0.182596	0.440982	204.489	203.115	150.523	160.894	135.898	155.186	53.1578	102.599	93.0481
BJN34_00805	dienelactone hydrolase	0.688444	5.96533	9.4301	0.00213452	0.00855016	0.655004	5.96533	8.54605	0.00346274	0.0281408	0.0334402	5.96533	0.0236201	0.877855	0.951571	224.965	191.256	49.6008	56.6461	35.8687	65.2873	28.6283	146.485	34.3286
BJN34_00810	enoyl-CoA hydratase	0.566616	6.53617	4.91835	0.0265728	0.0697197	0.237383	6.53617	0.86164	0.35328	0.628013	0.329233	6.53617	1.69221	0.19331	0.455678	137.551	128.836	107.56	83.6059	106.156	111.927	45.2277	83.3631	78.3628
BJN34_00815	adenosylmethionine--8-amino-7-oxononanoate transaminase	0.535447	9.19565	3.24168	0.0717871	0.154697	0.927624	9.19565	9.63456	0.0019095	0.0179152	-0.392177	9.19565	1.75034	0.185834	0.446001	336.046	283.935	444.734	482.027	382.186	602.368	158.755	237.702	219.188
BJN34_00820	8-amino-7-oxononanoate synthase	0.33849	8.75309	1.13778	0.286121	0.43627	0.900267	8.75309	7.95754	0.00478873	0.0362374	-0.561777	8.75309	3.13556	0.0766022	0.265995	272.15	213.937	350.936	411.082	328.232	558.724	130.063	212.562	214.318
BJN34_00825	dethiobiotin synthase	0.105887	7.72904	0.115178	0.734325	0.832309	0.717222	7.72904	5.25876	0.0218366	0.108853	-0.611335	7.72904	3.84239	0.0499723	0.204255	191.318	162.822	282.303	331.152	265.542	429.229	139.236	169.185	187.714
BJN34_00830	biotin synthase BioB	0.193559	8.94999	0.301577	0.582895	0.717888	0.71445	8.94999	4.0766	0.043481	0.173035	-0.520891	8.94999	2.17966	0.139846	0.377255	310.383	277.595	525.365	531.57	442.334	721.394	191.326	319.98	317.1
BJN34_00835	3-methylcrotonyl-CoA carboxylase	0.148434	8.45046	0.260026	0.610103	0.73904	0.523348	8.45046	3.22351	0.0725876	0.243153	-0.374915	8.45046	1.66228	0.197296	0.459919	137.47	112.831	167.786	173.257	152.391	241.45	79.1033	125.808	110.637
BJN34_00840	IS256 family transposase	0.243986	6.35597	1.16711	0.279995	0.429864	0.207598	6.35597	0.845724	0.357765	0.631344	0.036388	6.35597	0.0265123	0.870656	0.949604	59.6359	65.9972	55.4515	54.7354	53.8975	72.3412	33.8305	48.8067	42.5637
BJN34_00845	glyoxylate/hydroxypyruvate reductase A	-0.679688	7.21471	9.42375	0.00214193	0.00856773	-0.314346	7.21471	2.04661	0.152545	0.39043	-0.365342	7.21471	2.73726	0.098033	0.308034	105.887	108.277	102.571	132.968	138.874	146.15	115.36	167.603	133.951
BJN34_0085	hypothetical protein	0.884233	3.8304	5.76073	0.0163882	0.04687	0.536986	3.8304	2.0869	0.148567	0.385334	0.347247	3.8304	0.969599	0.32478	0.599195	133.147	50.8465	26.885	34.4284	24.8133	44.1746	11.2742	25.9837	19.1742
BJN34_00850	hydroxymethylglutaryl-CoA lyase	-0.155384	7.36668	0.326273	0.567862	0.704511	-0.207041	7.36668	0.579121	0.446657	0.708999	0.0516565	7.36668	0.0361173	0.849273	0.940158	154.465	151.501	142.428	141.214	144.269	157.314	90.8997	198.718	123.682
BJN34_00855	cys-tRNA(pro)/cys-tRNA(cys) deacylase	0.0965274	6.15777	0.164518	0.685031	0.795831	-0.00660927	6.15777	0.000770357	0.977857	0.990256	0.103137	6.15777	0.19006	0.662867	0.841682	52.6183	131.628	122.569	124.569	114.08	131.089	68.5213	126.807	103.743
BJN34_00860	thioesterase	0.0269732	5.73825	0.0115689	0.914346	0.949877	0.0183192	5.73825	0.00534866	0.941699	0.977706	0.00865406	5.73825	0.00120928	0.972259	0.990426	97.4086	112.44	112.675	105.665	102.957	122.072	63.6515	111.115	87.0541
BJN34_00865	Fe-S oxidoreductase	0.0102292	4.72864	0.00163071	0.967789	0.981683	-0.0788271	4.72864	0.0965661	0.75599	0.895854	0.0890564	4.72864	0.126438	0.722154	0.873313	99.5799	66.7669	70.3384	84.4763	70.562	72.2102	53.8714	68.2357	68.4908
BJN34_00870	MBL fold metallo-hydrolase	0.0913657	5.96783	0.155415	0.693413	0.802388	0.236896	5.96783	1.05307	0.304801	0.58187	-0.145531	5.96783	0.404697	0.524674	0.753333	51.9851	59.7463	54.6869	64.0792	56.4356	68.6508	42.8261	47.7377	36.9675
BJN34_00875	TonB-dependent receptor	-0.661726	10.4845	1.1233	0.289208	0.439525	-0.49495	10.4845	0.630871	0.427036	0.691163	-0.166775	10.4845	0.0719304	0.788547	0.909831	425.048	409.206	542.034	567.953	708.189	307.471	791.292	117.749	853.212
BJN34_00880	hypothetical protein	-1.32318	6.67691	3.06846	0.0798251	0.168099	-0.850829	6.67691	1.29505	0.25512	0.528244	-0.472353	6.67691	0.401992	0.526062	0.754444	160.696	169.193	75.5604	224.021	270.603	57.0046	429.511	49.0207	299.188
BJN34_00885	cobalamin (vitamin B12) synthesis	-0.917932	8.16181	3.59309	0.0580204	0.130943	-0.457956	8.16181	0.906376	0.341078	0.615571	-0.459976	8.16181	0.913012	0.339317	0.613909	135.226	143.506	130.151	237.63	231.213	101.455	267.64	82.5235	268.415
BJN34_00890	RNA polymerase-binding protein DksA	-0.825741	10.0001	10.4764	0.00120906	0.00533219	-0.390248	10.0001	2.36681	0.12394	0.343265	-0.435492	10.0001	2.94136	0.086338	0.285348	1022.13	1006.3	828.087	1380.28	1264.46	1286.24	1438.97	1029.74	1611.57
BJN34_00895	cobalamin biosynthesis protein CobW	0.623097	10.2431	2.86413	0.0905747	0.18527	0.613335	10.2431	2.77581	0.095698	0.2919	0.00976158	10.2431	0.000709043	0.978757	0.99333	1195.75	1259.05	928.721	1265.54	1311.02	809.034	774.916	337.209	627.528
BJN34_0090	hypothetical protein	0.753831	5.40329	3.62509	0.0569144	0.129036	-0.221699	5.40329	0.310022	0.577667	0.796296	0.97553	5.40329	6.05454	0.0138706	0.0890085	108.341	107.964	66.178	76.5896	63.6628	51.3164	86.4115	76.445	57.8409
BJN34_00900	Fur family transcriptional regulator	0.143256	7.77165	0.10154	0.749989	0.842051	0.427875	7.77165	0.903836	0.341755	0.615907	-0.284619	7.77165	0.401412	0.526361	0.754716	382.687	387.272	264.065	516.256	473.926	274.645	336.284	100.161	300.31
BJN34_00905	alpha/beta hydrolase	1.6346	5.89568	43.5	4.24e-11	1.16e-09	0.580616	5.89568	5.43027	0.0197906	0.101329	1.05398	5.89568	19.4571	1.03e-05	0.000263841	238.011	177.101	72.2364	48.123	41.0777	101.952	17.3508	30.4217	27.3745
BJN34_00910	ABC transporter substrate-binding protein	0.766451	10.3443	6.09066	0.0135898	0.0402463	0.832448	10.3443	7.17106	0.0074089	0.0496604	-0.0659971	10.3443	0.0457496	0.830632	0.930479	1096.55	1208.13	1558.12	1699.23	1399.2	1100.16	483.54	600.661	815.84
BJN34_00915	HslU--HslV peptidase proteolytic subunit	1.06515	7.93282	4.21557	0.0400545	0.0977918	1.82239	7.93282	11.8846	0.000565988	0.00680364	-0.757238	7.93282	2.1661	0.141084	0.37922	420.344	453.085	270.8	358.841	1178.78	358.18	72.7476	176.218	199.374
BJN34_00920	HslU--HslV peptidase ATPase subunit	1.152	9.33827	3.46259	0.0627719	0.139484	1.95259	9.33827	9.51853	0.00203408	0.0187949	-0.800593	9.33827	1.6972	0.192655	0.455581	406.436	491.941	310.563	392.663	1358.05	314.261	48.713	194.282	210.045
BJN34_00925	hypothetical protein	-1.41875	3.14913	7.073	0.00782543	0.0252721	-0.63591	3.14913	1.53422	0.21548	0.479436	-0.78284	3.14913	2.14611	0.142931	0.381517	17.2591	15.6784	7.89936	23.9323	31.2141	17.1651	49.3736	17.9765	20.2993
BJN34_00930	two-component system response regulator	-0.823739	4.8009	0.585119	0.444313	0.591165	2.16869	4.8009	3.84318	0.0499487	0.189816	-2.99243	4.8009	6.84697	0.00887919	0.066321	28.6604	3.06513	1.66104	25.8173	181.644	48.2128	25.8418	1.73563	16.7774
BJN34_00935	ATP-binding protein	-0.395148	5.39213	0.613213	0.433581	0.582708	0.683211	5.39213	1.85085	0.173685	0.422556	-1.07836	5.39213	4.54719	0.0329728	0.157777	16.3113	19.1928	16.7381	21.5885	70.6454	18.0769	21.1398	17.2722	17.3857
BJN34_00940	copper chaperone PCu(A)C	-0.654705	7.58075	1.62088	0.20297	0.339191	0.396294	7.58075	0.598901	0.438997	0.701828	-1.051	7.58075	4.13118	0.0420999	0.183563	205.26	242.55	218.655	236.925	883.581	256.722	181.501	411.869	280.123
BJN34_00945	LysR family transcriptional regulator	-0.222161	5.85429	0.656899	0.417657	0.568144	0.0317479	5.85429	0.0135707	0.907262	0.965665	-0.253909	5.85429	0.868357	0.351411	0.625759	48.0614	37.1091	55.5721	61.7978	57.7769	54.4361	42.3584	40.3032	53.3046
BJN34_0095	hypothetical protein	-0.233595	1.83572	0.108369	0.742009	0.837846	0.307555	1.83572	0.197691	0.656591	0.846757	-0.54115	1.83572	0.616913	0.432197	0.689682	6.00468	6.1179	4.01079	8.78655	8.02856	9.33196	6.2174	9.88446	4.97941
BJN34_00950	EamA-like transporter family protein	0.83721	2.58577	3.16848	0.0750722	0.160086	0.126311	2.58577	0.0670233	0.795721	0.913694	0.710899	2.58577	2.43609	0.118571	0.344374	13.0026	12.9599	10.0225	5.93302	11.2615	4.80244	2.68753	7.63429	6.16906
BJN34_00955	hypothetical protein	-0.903047	1.76752	2.40652	0.120831	0.230692	-0.0400651	1.76752	0.00549695	0.940898	0.977571	-0.862982	1.76752	2.29303	0.129956	0.362633	8.75141	14.9826	0.491404	12.6	18.1363	11.3221	13.6447	10.3226	3.04115
BJN34_00960	acetylglutamate kinase	-0.976944	8.62784	14.3382	0.000152736	0.000900803	-0.628024	8.62784	6.00282	0.014283	0.0796261	-0.34892	8.62784	1.85451	0.173259	0.427834	264.803	283.008	250.028	349.66	352.522	335.301	424.392	319.77	531.608
BJN34_00965	pyrimidine 5'-nucleotidase	-0.835193	5.94672	8.54997	0.00345529	0.0127938	-0.433018	5.94672	2.35048	0.125245	0.345083	-0.402175	5.94672	1.99233	0.158098	0.404983	47.8642	38.1324	37.2181	62.4208	57.2013	46.0157	64.6682	42.7819	69.7217
BJN34_00970	nucleoid occlusion factor SlmA	-0.744472	6.78996	10.3296	0.00130912	0.00568298	-0.352488	6.78996	2.36022	0.124465	0.343849	-0.391984	6.78996	2.87871	0.0897577	0.291669	111.732	98.944	110.743	153.828	144.415	134.569	117.53	157.417	169.279
BJN34_00975	homoserine O-acetyltransferase	-0.931069	6.25877	14.79	0.000120173	0.000729336	-0.586077	6.25877	5.99717	0.0143289	0.0796893	-0.344992	6.25877	2.03505	0.153709	0.399913	36.8696	36.8431	45.5168	50.6003	49.5484	56.8369	59.8214	62.0256	65.8163
BJN34_00980	methionine biosynthesis protein MetW	-0.88196	5.02494	13.4776	0.000241427	0.00134918	-0.617161	5.02494	6.80856	0.0090722	0.0576822	-0.264799	5.02494	1.19295	0.274736	0.552504	37.0814	36.4284	28.1414	48.8713	36.3974	39.8309	39.0592	59.4624	55.0792
BJN34_00985	LysR family transcriptional regulator	0.337904	3.9568	0.727907	0.393563	0.5469	-0.290476	3.9568	0.520741	0.470526	0.727539	0.62838	3.9568	2.51441	0.11281	0.332522	16.5069	13.6299	21.1232	9.19647	12.3617	12.969	7.80064	17.7553	8.30376
BJN34_00990	EamA/RhaT family transporter	0.215299	3.19345	0.325111	0.568552	0.704862	0.822978	3.19345	5.13148	0.0234957	0.114545	-0.607679	3.19345	3.02846	0.0818155	0.277148	9.94665	6.67636	5.43577	11.9901	9.1252	13.1921	6.32569	4.9262	3.86219
BJN34_00995	acyl-CoA thioesterase	0.329326	5.45593	0.811382	0.367712	0.520299	0.690733	5.45593	3.58207	0.0584063	0.21019	-0.361407	5.45593	1.00386	0.316379	0.592376	60.4328	34.4796	36.0936	34.2416	65.1091	70.3822	17.7384	30.1337	37.2555
BJN34_0100	hypothetical protein	0.132783	1.22516	0.033367	0.85506	0.912977	0.533446	1.22516	0.574426	0.448506	0.710303	-0.400663	1.22516	0.350352	0.553914	0.775435	154.404	143.72	5.23353	149.909	115.724	154.227	6.43545	96.8027	100.325
BJN34_01000	muropeptide transporter AmpG	-0.643619	6.00508	7.92299	0.00488105	0.0170437	-0.276494	6.00508	1.49816	0.220954	0.486699	-0.367125	6.00508	2.59222	0.10739	0.325501	38.742	32.1723	32.113	49.2182	40.4054	46.3248	43.9194	38.4355	48.3498
BJN34_01005	peptidase M48	0.301261	7.15705	2.02678	0.154548	0.278043	0.281167	7.15705	1.767	0.183754	0.438275	0.0200935	7.15705	0.00916805	0.923719	0.970978	4.33214	11.5762	119.001	12.4917	1.7372	14.3668	78.0873	5.11141	4.02007
BJN34_01010	N-acetyl-gamma-glutamyl-phosphate reductase	-0.849415	8.76251	10.2625	0.00135761	0.00586405	-0.404109	8.76251	2.35391	0.124969	0.344599	-0.445305	8.76251	2.8473	0.0915276	0.295311	257.138	254.234	339.107	392.228	409.803	399.475	397.614	387.123	484.515
BJN34_01015	type II toxin-antitoxin system MqsR family toxin	0.142713	6.1674	0.20172	0.653336	0.773677	0.0564281	6.1674	0.031515	0.859096	0.944227	0.0862845	6.1674	0.0743371	0.785124	0.907823	263.178	287.056	129.278	236.128	184.727	219.659	97.5933	216.596	183.683
BJN34_01020	YgiT-type zinc finger protein	0.247304	6.18784	0.523613	0.469305	0.6173	0.177356	6.18784	0.269288	0.603809	0.813488	0.0699472	6.18784	0.042306	0.837038	0.934086	212.861	214.327	96.0546	170.272	157.113	169.389	65.0729	170.779	120.787
BJN34_01025	exodeoxyribonuclease III	-0.598678	6.69961	5.41778	0.0199327	0.0553607	-0.231423	6.69961	0.821324	0.364793	0.63713	-0.367255	6.69961	2.05037	0.15217	0.398044	100.108	96.6856	79.3602	127.001	121.626	113.193	128.125	85.618	121.825
BJN34_01030	orotate phosphoribosyltransferase	-0.256604	6.74454	0.897039	0.343577	0.495403	0.213671	6.74454	0.628251	0.427997	0.692072	-0.470275	6.74454	3.03462	0.0815054	0.276368	95.9114	119.412	123.266	176.894	174.471	131.518	99.8526	100.268	133.271
BJN34_01035	hypothetical protein	0.0484115	6.97585	0.0324915	0.856953	0.913938	-0.1523	6.97585	0.320683	0.571197	0.792796	0.200712	6.97585	0.559638	0.454406	0.705859	109.962	97.9599	65.612	78.0159	75.8756	86.0782	44.4918	91.5844	79.8381
BJN34_01040	polyphosphate kinase	0.480565	7.43104	3.22483	0.0725293	0.155912	0.274051	7.43104	1.04988	0.305535	0.582629	0.206514	7.43104	0.602299	0.437702	0.693208	257.078	247.597	152.185	187.365	156.123	232.261	88.9741	165.125	127.948
BJN34_01045	diaminopimelate epimerase	-0.122342	6.9051	0.303611	0.581628	0.716837	0.0516573	6.9051	0.0544467	0.815499	0.923031	-0.173999	6.9051	0.619915	0.431079	0.688546	114.102	108.705	111.935	130.424	127.553	129.331	101.939	99.443	95.4205
BJN34_0105	cupin domain-containing protein	0.249683	3.36252	0.348293	0.555081	0.69275	-0.349959	3.36252	0.653817	0.418751	0.68496	0.599642	3.36252	2.00056	0.157241	0.403685	31.7138	26.7155	35.8462	13.4292	12.945	16.6203	12.6203	16.9503	13.5251
BJN34_01050	lauroyl acyltransferase	-0.719615	5.28251	5.37146	0.0204688	0.0565097	0.184604	5.28251	0.370859	0.542536	0.775813	-0.904219	5.28251	8.60524	0.00335197	0.0327349	21.9278	19.1952	31.5071	57.4959	40.8101	44.4247	29.493	30.2406	40.3928
BJN34_01055	lauroyl acyltransferase	-1.12571	5.90042	12.4945	0.000408155	0.00213772	-0.338569	5.90042	1.17869	0.277624	0.554287	-0.78714	5.90042	6.1673	0.0130133	0.0856505	31.9383	35.712	8.14131	70.0088	60.103	54.2314	75.042	39.7577	68.3519
BJN34_01060	methionine adenosyltransferase	-1.1307	9.2858	15.3561	8.9e-05	0.000566611	-0.81115	9.2858	8.00644	0.00466114	0.0355437	-0.319547	9.2858	1.25243	0.263089	0.540227	261.754	268.353	398.59	366.842	400.839	443.568	501.23	618.397	580.051
BJN34_01065	3-deoxy-D-manno-oct-2-ulosonic acid (Kdo) hydroxylase	-1.16136	7.65608	26.6806	2.4e-07	3.04e-06	-0.344514	7.65608	2.43322	0.118789	0.335952	-0.816841	7.65608	13.3437	0.000259287	0.0045682	137.191	114.746	86.758	198.618	191.998	212.834	196.475	229.002	184.268
BJN34_01070	coniferyl aldehyde dehydrogenase	0.361867	5.15512	1.37575	0.240827	0.385992	0.4516	5.15512	2.15301	0.14229	0.373911	-0.0897329	5.15512	0.0879824	0.766758	0.896644	30.0205	20.3155	18.9045	20.5855	21.2549	33.0772	11.6812	12.0389	20.1007
BJN34_01075	GMC family oxidoreductase	1.25136	4.35474	9.69675	0.00184594	0.00757307	0.228473	4.35474	0.315893	0.574086	0.794995	1.02289	4.35474	6.74514	0.00940034	0.0687307	24.9635	17.2147	7.58731	8.02917	5.97639	10.1952	3.90992	7.1049	5.51923
BJN34_01080	DNA alkylation response protein	0.777331	7.21019	5.94878	0.0147275	0.042936	0.490865	7.21019	2.38292	0.122668	0.340423	0.286466	7.21019	0.823172	0.364254	0.635449	116.571	100.586	76.1969	83.6356	68.5897	91.9028	24.2979	69.6633	46.8818
BJN34_01085	phosphomethylpyrimidine synthase ThiC	0.324933	9.1736	2.20462	0.137598	0.254876	-0.0611067	9.1736	0.0779926	0.780036	0.904602	0.386039	9.1736	3.11418	0.0776136	0.26818	334.175	313.831	293.257	260.18	244.886	229.961	201.562	195.176	213.558
BJN34_01090	cytochrome C biogenesis protein CcdA	0.152388	6.79643	0.437668	0.50825	0.653442	0.366932	6.79643	2.54828	0.110415	0.319884	-0.214544	6.79643	0.883007	0.347379	0.621834	94.6262	84.5772	61.2647	81.8348	101.898	97.4208	48.7103	64.3228	62.2143
BJN34_01095	thiamine biosynthesis protein ThiS	0.375845	4.79149	2.27144	0.131778	0.247203	0.384175	4.79149	2.38344	0.122627	0.340423	-0.00832951	4.79149	0.00119549	0.972418	0.990442	156.992	136.741	98.3309	118.082	141.928	135.655	70.0822	82.7209	90.1598
BJN34_0110	hypothetical protein	-0.0377978	1.66679	0.00304058	0.956026	0.975018	-0.41543	1.66679	0.353448	0.552168	0.78155	0.377633	1.66679	0.299748	0.58404	0.794886	4.73602	13.8288	4.87353	11.5068	2.31786	4.47166	2.74365	11.5882	4.8704
BJN34_01100	thiazole synthase	0.145753	6.29496	0.326756	0.567576	0.704282	0.23889	6.29496	0.880582	0.348042	0.621895	-0.0931371	6.29496	0.135706	0.712588	0.869088	98.8527	83.4713	66.1513	89.0725	97.3889	80.9545	40.5754	71.4703	71.5133
BJN34_01105	thiamine phosphate synthase	0.285931	6.67241	0.978574	0.322551	0.475078	0.544841	6.67241	3.55707	0.0592924	0.212095	-0.258911	6.67241	0.815272	0.366566	0.636714	88.7339	76.6123	67.9753	101.407	104.442	77.0346	30.6545	59.9604	67.1941
BJN34_01110	phenylacetic acid degradation protein	-0.0303892	5.24997	0.00396208	0.94981	0.971174	1.1604	5.24997	5.76395	0.0163583	0.0875983	-1.19079	5.24997	6.08964	0.0135977	0.087946	27.2557	28.2316	86.9044	119.326	126.063	104.394	34.9987	51.9853	38.1962
BJN34_01115	hypothetical protein	-0.0261651	4.96029	0.0096739	0.92165	0.955315	-0.22768	4.96029	0.724675	0.394615	0.664796	0.201515	4.96029	0.576991	0.447494	0.699898	65.7285	74.5382	52.1704	50.1753	61.4845	57.2911	35.4096	65.608	59.0304
BJN34_01120	bifunctional hydroxymethylpyrimidine kinase/phosphomethylpyrimidine kinase	-0.468139	6.1402	3.24194	0.0717755	0.154697	-0.164083	6.1402	0.404093	0.524983	0.765743	-0.304057	6.1402	1.37721	0.240577	0.516513	72.2917	52.0934	58.7948	70.5351	72.6648	88.535	76.4136	56.7797	71.6385
BJN34_01125	adenosylhomocysteinase	-1.7783	9.78283	27.8624	1.3e-07	1.74e-06	-1.06392	9.78283	10.3629	0.00128576	0.0130345	-0.714379	9.78283	4.71473	0.0299053	0.148009	242.16	202.896	340.708	428.117	474.567	442.155	839.549	564.386	820.316
BJN34_01130	phage holin family protein	-1.94791	7.09844	53.4688	2.63e-13	9.83e-12	-1.17815	7.09844	20.688	5.41e-06	0.000131321	-0.769757	7.09844	8.6641	0.00324541	0.031874	189.382	138.525	139.926	287.986	251.317	274.834	541.649	384.091	529.569
BJN34_01135	methylenetetrahydrofolate reductase [NAD(P)H]	-1.41144	7.73797	43.2688	4.77e-11	1.29e-09	-0.95738	7.73797	20.4633	6.08e-06	0.000146647	-0.454061	7.73797	4.56932	0.0325495	0.156727	143.294	143.702	115.844	188.46	187.168	185.373	272.209	268.616	328.141
BJN34_01140	competence protein	-1.51888	5.66088	29.8366	4.7e-08	6.98e-07	-0.672259	5.66088	6.25703	0.0123701	0.0720361	-0.846621	5.66088	9.33639	0.00224647	0.0246898	55.7222	74.6746	61.6929	140.971	102.229	112.323	174.77	139.381	131.948
BJN34_01145	twitching motility protein PilT	0.19966	5.53471	0.720453	0.395995	0.549694	0.0854831	5.53471	0.131722	0.716654	0.879651	0.114177	5.53471	0.241782	0.622922	0.819672	64.2074	49.4155	57.326	61.9432	44.5434	55.7299	35.3425	43.8853	42.7361
BJN34_0115	hypothetical protein	0.898219	2.51811	3.65183	0.0560076	0.127733	0.473234	2.51811	0.96988	0.32471	0.598943	0.424986	2.51811	0.926957	0.335655	0.609514	96.6848	90.1365	9.85998	130.87	7.84865	151.402	6.61191	9.84846	6.45445
BJN34_01150	5-formyltetrahydrofolate cyclo-ligase	-0.0428883	4.33443	0.0225746	0.880569	0.927591	0.230827	4.33443	0.672713	0.412107	0.679145	-0.273716	4.33443	0.970173	0.324637	0.599195	33.1201	31.5663	17.0718	32.2681	29.8135	37.7469	23.2004	21.8342	22.5064
BJN34_01155	lytic transglycosylase	-0.76368	8.21983	11.3058	0.000772647	0.00366928	-0.266531	8.21983	1.39818	0.237029	0.507637	-0.497149	8.21983	4.82257	0.0280894	0.141654	28.5461	17.6135	102.38	17.2721	138.312	15.9351	122.926	132.609	148.292
BJN34_01160	NAD-dependent dehydratase	0.261948	5.36303	0.883439	0.347261	0.499572	0.176558	5.36303	0.400724	0.526716	0.767139	0.0853902	5.36303	0.0963777	0.756221	0.89064	47.9936	42.9242	23.4505	41.1796	31.8156	34.8704	25.4858	28.9718	21.1501
BJN34_01165	glutathione S-transferase	-1.07464	6.50511	18.0326	2.17e-05	0.000165406	-0.806426	6.50511	10.3354	0.00130503	0.0131912	-0.268218	6.50511	1.12834	0.28813	0.564679	75.1686	82.005	77.4046	94.5168	93.6515	101.79	100.554	125.022	182.752
BJN34_01170	multifunctional CCA tRNA nucleotidyl transferase/2'3'-cyclic phosphodiesterase/2'nucleotidase/phosphatase	-0.643014	6.82642	8.63377	0.00329987	0.0123304	-0.226469	6.82642	1.09198	0.296034	0.570958	-0.416545	6.82642	3.64504	0.0562364	0.218999	58.28	62.3785	62.5093	90.281	73.4412	88.4002	71.4873	82.233	80.9438
BJN34_01175	sulfate transporter	-0.0771514	2.09426	0.0338455	0.854036	0.912605	-0.672164	2.09426	2.29402	0.129874	0.353639	0.595012	2.09426	1.86913	0.171574	0.425468	8.8091	8.02259	6.42112	2.53777	4.835	8.21063	5.50992	7.30025	7.28742
BJN34_01180	ABC transporter ATP-binding protein	0.645104	2.53519	1.72931	0.188499	0.321441	0.829407	2.53519	2.93088	0.0869002	0.273126	-0.184303	2.53519	0.165109	0.684496	0.854049	6.15545	5.79486	5.17529	7.86348	5.41611	6.54118	0.385577	3.50856	4.98153
BJN34_01185	ABC transporter ATP-binding protein	2.10317	2.20392	17.7196	2.56e-05	0.000190573	1.12848	2.20392	4.39421	0.0360612	0.153388	0.974686	2.20392	5.26557	0.0217513	0.11936	8.98154	10.1274	4.72336	3.52951	2.774	5.61568	1.43777	1.53935	0.918661
BJN34_01190	branched-chain amino acid ABC transporter permease	N/A	N/A	N/A	N/A	N/A	N/A	N/A	N/A	N/A	N/A	N/A	N/A	N/A	N/A	N/A	1.77784	1.4872	0.483451	0.258342	0	0	0	0	0.515773
BJN34_01195	branched-chain amino acid ABC transporter permease	0.682245	1.12511	0.871559	0.350524	0.503011	-2.40659	1.12511	6.44347	0.0111361	0.0667585	3.08883	1.12511	11.9069	0.000559268	0.00851335	2.418	4.50091	1.08716	0.414674	0	0.115215	2.08498	1.09514	0.588221
BJN34_0120	NUDIX hydrolase	0.54521	3.42082	0.919124	0.337705	0.490323	0.366646	3.42082	0.414149	0.519871	0.762935	0.178564	3.42082	0.102203	0.749202	0.888398	32.5648	30.3121	12.7415	24.8962	23.3077	18.0157	2.76793	24.9639	14.5535
BJN34_01200	amino acid ABC transporter substrate-binding protein	0.749826	3.84628	2.17469	0.140297	0.258501	-0.294503	3.84628	0.32513	0.568541	0.791537	1.04433	3.84628	4.19574	0.0405258	0.180451	21.7598	13.2654	6.31055	6.09695	3.2833	10.5352	3.41156	8.54093	7.69501
BJN34_01205	sugar ABC transporter substrate-binding protein	1.81867	3.18763	7.22956	0.00717126	0.0234881	0.0526939	3.18763	0.00592333	0.938653	0.976301	1.76598	3.18763	6.97215	0.00827879	0.0628179	12.1227	8.91091	8.81577	3.26582	2.9426	2.55107	0	3.91656	3.06506
BJN34_01210	ABC transporter	-0.0346494	1.35023	0.0020049	0.964286	0.979384	0.477044	1.35023	0.417336	0.51827	0.761889	-0.511693	1.35023	0.50148	0.478851	0.720461	1.77533	1.98946	0.44556	2.56835	1.02679	2.51458	2.26554	0.48925	0.49909
BJN34_01215	ABC transporter permease	-0.322613	1.86643	0.129512	0.718939	0.82117	-0.240856	1.86643	0.0726611	0.787501	0.908963	-0.0817568	1.86643	0.00835583	0.927167	0.972535	1.51375	4.07377	1.71572	1.80136	5.82241	0	1.9992	2.21107	3.33946
BJN34_01220	sugar ABC transporter permease	-0.408713	2.38066	0.911091	0.339825	0.492043	-0.100543	2.38066	0.0586825	0.80859	0.92023	-0.30817	2.38066	0.538753	0.46295	0.711061	3.19917	4.64038	3.35882	7.1918	3.50987	3.68493	4.38626	3.67612	4.08531
BJN34_01225	DUF2905 domain-containing protein	-0.289706	3.48608	0.752464	0.385697	0.539291	0.392275	3.48608	1.5134	0.218621	0.483775	-0.681982	3.48608	4.56761	0.032582	0.156774	49.4386	38.1157	23.6379	58.2055	62.6689	60.8013	36.2341	43.2091	30.0887
BJN34_01230	hypothetical protein	-1.17633	7.27137	21.8781	2.91e-06	2.87e-05	-0.347796	7.27137	1.98532	0.158831	0.400996	-0.828534	7.27137	10.9733	0.000924319	0.0125449	77.9274	53.3121	69.8032	118.479	114.725	134.247	113.312	147.397	112.479
BJN34_01235	short chain dehydrogenase	-0.453111	5.87143	2.97778	0.0844152	0.17564	-0.361441	5.87143	1.90766	0.167223	0.411754	-0.0916703	5.87143	0.122062	0.726808	0.87583	48.4557	52.9257	54.471	64.6025	59.5668	46.7173	63.3523	52.6059	58.1546
BJN34_01240	diguanylate cyclase	-0.634718	5.49881	7.0598	0.00788326	0.0253878	-0.602028	5.49881	6.39121	0.0114687	0.0678903	-0.0326896	5.49881	0.0185078	0.891787	0.95525	75.468	81.3688	85.3972	78.0139	91.7364	84.5866	91.3624	100.026	117.882
BJN34_01245	tRNA 2-thiocytidine(32) synthetase TtcA	-0.932865	6.69758	7.89584	0.00495486	0.0172486	-0.435044	6.69758	1.75219	0.185602	0.440975	-0.497821	6.69758	2.2701	0.131892	0.36562	53.9026	63.0947	78.0983	100.351	101.779	83.5725	116.108	68.0249	122.073
BJN34_0125	hypothetical protein	N/A	N/A	N/A	N/A	N/A	N/A	N/A	N/A	N/A	N/A	N/A	N/A	N/A	N/A	N/A	0	0	0	40.3745	0	0	0	0	0
BJN34_01250	hypothetical protein	0.571639	5.2745	3.91206	0.0479408	0.112849	0.541581	5.2745	3.51495	0.0608174	0.215838	0.0300575	5.2745	0.0113667	0.915094	0.965797	58.964	50.2264	29.5746	2.79665	37.0561	59.4336	19.0452	29.5792	26.369
BJN34_01255	UDP-N-acetylglucosamine diphosphorylase/glucosamine-1-phosphate N-acetyltransferase	-1.69859	8.33128	26.0781	3.28e-07	4.08e-06	-1.19396	8.33128	13.2658	0.00027029	0.00378079	-0.50462	8.33128	2.4047	0.120971	0.349002	89.9726	93.2697	136.685	148.579	176.68	146.979	321.4	214.124	321.335
BJN34_01260	glutamine--fructose-6-phosphate aminotransferase	-1.3568	8.44653	33.2402	8.15e-09	1.52e-07	-0.971895	8.44653	17.4042	3.02e-05	0.000606407	-0.384901	8.44653	2.74373	0.0976366	0.307149	108.301	91.6977	104.42	128.209	144.122	135.177	172.812	229.487	240.994
BJN34_01265	hypothetical protein	0.131768	4.77673	0.143286	0.705036	0.811448	0.127069	4.77673	0.133395	0.714937	0.878011	0.0046994	4.77673	0.000186531	0.989103	0.997991	99.9651	111.733	39.1992	82.9689	72.6527	93.391	55.2533	77.4696	48.6656
BJN34_01270	hypothetical protein	-0.0208055	7.54174	0.00787439	0.92929	0.959786	0.121076	7.54174	0.2673	0.605149	0.814076	-0.141882	7.54174	0.368444	0.543854	0.768028	184.667	204.665	138.2	210.228	158.707	223.287	116.664	179.72	138.295
BJN34_01275	hypothetical protein	0.272143	8.44941	1.14893	0.283774	0.43355	0.19724	8.44941	0.603811	0.437128	0.699631	0.0749038	8.44941	0.0874653	0.767425	0.897272	209.418	210.455	135.542	184.553	149.221	200.402	92.079	165.19	116.476
BJN34_01285	hypothetical protein	0.629823	1.76653	1.49029	0.222172	0.363755	0.360922	1.76653	0.468965	0.493464	0.745038	0.268901	1.76653	0.316719	0.573586	0.78943	12.2688	6.66748	4.71589	7.7887	6.05285	6.32918	5.31246	3.16489	3.5602
BJN34_01290	integrase	0.366812	3.61166	1.71125	0.190824	0.324555	0.19327	3.61166	0.46595	0.494856	0.745782	0.173542	3.61166	0.420013	0.51693	0.748168	6.99661	6.2143	4.88934	5.73713	4.97661	5.66293	3.19401	4.01343	4.152
BJN34_01295	integrase	-0.486812	2.57291	1.69193	0.193347	0.327159	0.049151	2.57291	0.0194198	0.88917	0.958107	-0.535963	2.57291	2.20875	0.13723	0.373204	2.50442	1.89139	1.18931	3.01976	2.96144	2.40758	1.74554	2.3229	2.2461
BJN34_0130	type I toxin-antitoxin system SymE family toxin	0.105381	2.5122	0.0790347	0.77861	0.862962	-0.617787	2.5122	2.38783	0.122283	0.340305	0.723168	2.5122	3.51145	0.0609463	0.231033	28.0439	23.2631	19.7828	20.4412	14.1212	9.62815	18.8003	16.7246	17.311
BJN34_01300	integrase	-0.0202309	2.34467	0.00291636	0.956933	0.975387	0.0572067	2.34467	0.0240748	0.876695	0.953807	-0.0774376	2.34467	0.0471041	0.828181	0.929539	2.79506	2.93202	1.92708	2.86109	2.84247	2.54841	2.20186	1.96702	1.87142
BJN34_01310	Restriction endonuclease S subunit	0.935637	2.50936	3.84575	0.0498721	0.116189	0.684412	2.50936	2.00881	0.156388	0.397078	0.251225	2.50936	0.324226	0.569079	0.786802	5.47704	11.98	5.33947	6.40081	7.2977	5.34562	1.98119	2.98331	4.31876
BJN34_01315	type I restriction endonuclease subunit R	-0.176274	3.28865	0.177509	0.673523	0.788398	-0.423652	3.28865	1.00693	0.31564	0.590603	0.247377	3.28865	0.346752	0.555958	0.777667	11.1554	10.2672	6.33706	7.82097	3.57041	12.4737	7.5211	9.87605	8.06577
BJN34_01320	IS630 family transposase	0.423937	6.01717	3.72086	0.0537368	0.123571	0.543531	6.01717	6.15228	0.0131243	0.0748539	-0.119594	6.01717	0.310576	0.577327	0.791404	58.7993	63.3914	46.5654	66.0387	52.1525	68.4342	28.0006	39.2108	34.7787
BJN34_01325	hypothetical protein	1.11592	3.70128	11.1125	0.000857467	0.00400614	0.693763	3.70128	4.15263	0.04157	0.16807	0.422159	3.70128	1.83221	0.175867	0.431197	58.2421	53.3365	36.0999	39.3664	26.5509	45.1173	14.0122	23.8982	15.192
BJN34_01330	type I restriction endonuclease subunit R	0.639796	4.2013	3.35381	0.0670498	0.146762	0.311199	4.2013	0.782748	0.376302	0.648945	0.328596	4.2013	0.934734	0.333636	0.60776	18.8836	17.9184	16.237	13.3077	11.9195	17.9325	12.8015	7.36381	6.86268
BJN34_01335	hypothetical protein	0.244553	1.84995	0.18668	0.665694	0.783223	0.590958	1.84995	1.15191	0.28315	0.558715	-0.346404	1.84995	0.436518	0.508808	0.742175	4.75153	13.6209	4.06758	8.56908	9.43684	10.5683	6.21793	2.81878	5.56236
BJN34_01340	hypothetical protein	0.561636	1.80767	1.19008	0.275314	0.424826	0.384411	1.80767	0.544219	0.460689	0.720103	0.177226	1.80767	0.137908	0.71037	0.867857	6.34007	13.2724	6.52556	10.1099	5.13016	8.30753	3.88268	5.40613	3.36053
BJN34_0135	hypothetical protein	-0.475779	1.71031	0.405871	0.524073	0.66683	-0.535266	1.71031	0.513873	0.473467	0.728832	0.0594873	1.71031	0.00624078	0.937034	0.976326	43.8639	48.4777	38.7473	55.7278	37.381	8.67598	8.59956	7.81282	30.681
BJN34_01350	DUF429 domain-containing protein	-0.526261	5.37181	4.92209	0.0265155	0.069622	-0.0271723	5.37181	0.0136493	0.906995	0.965665	-0.499088	5.37181	4.50828	0.0337311	0.160739	48.2259	45.6252	36.5006	55.7352	58.7294	73.8986	44.7104	62.1658	46.2568
BJN34_01355	MazF family transcriptional regulator	-0.259766	3.96219	0.677187	0.410557	0.562688	-0.107013	3.96219	0.117313	0.731967	0.885729	-0.152754	3.96219	0.239506	0.624563	0.820333	1.00912	14.4677	11.2614	15.6076	2.99845	57.5898	48.124	48.139	14.5521
BJN34_01360	PHA-granule associated protein 4	0.141514	5.90612	0.373305	0.541208	0.680589	0.0216015	5.90612	0.00867881	0.925776	0.972221	0.119912	5.90612	0.272688	0.601534	0.804854	147.09	138.723	151.685	158.927	110.004	146.89	98.202	113.088	114.973
BJN34_01365	RNA chaperone Hfq	0.185181	4.04291	0.360342	0.548317	0.687033	0.425181	4.04291	1.95169	0.162405	0.405384	-0.24	4.04291	0.654404	0.418543	0.68188	53.4377	47.6101	52.4917	70.5289	43.541	72.0105	27.4946	45.329	37.9471
BJN34_01370	hypothetical protein	0.870127	3.92628	3.85372	0.0496357	0.115716	0.674338	3.92628	2.3059	0.128884	0.352585	0.195789	3.92628	0.209225	0.647375	0.833475	28.4084	38.4177	10.647	20.2673	15.9903	31.2632	8.25266	13.9553	11.0375
BJN34_01375	hypothetical protein	1.32069	2.22072	7.02237	0.00804975	0.0258278	0.815846	2.22072	2.51334	0.112886	0.32446	0.504841	2.22072	1.27489	0.258851	0.535314	21.3081	25.3253	12.458	14.789	9.48509	16.9141	3.83124	4.00058	10.4871
BJN34_01380	serine hydrolase family protein	0.861139	3.39244	3.30947	0.0688816	0.149752	0.69802	3.39244	2.16581	0.14111	0.371642	0.16312	3.39244	0.129971	0.718463	0.87117	19.7841	19.032	14.9419	17.1816	11.1155	20.9918	9.06281	2.29813	11.8748
BJN34_01390	amidohydrolase	0.143438	6.73482	0.301881	0.582706	0.717783	0.0662484	6.73482	0.0643809	0.799701	0.91603	0.0771896	6.73482	0.0881778	0.766507	0.896638	88.4605	87.584	57.4288	69.582	58.1217	96.8958	43.5924	71.0898	56.8979
BJN34_01395	GNAT family N-acetyltransferase	-0.168657	1.64266	0.0848985	0.770766	0.858256	-0.453582	1.64266	0.592067	0.441621	0.704192	0.284925	1.64266	0.23883	0.625052	0.820333	6.24782	5.74308	3.01003	1.34363	3.91398	7.15714	6.78901	3.54334	3.17633
BJN34_0140	type I addiction module toxin, SymE family	0.117786	2.03896	0.0483436	0.825971	0.894436	0.38624	2.03896	0.541677	0.461739	0.720635	-0.268455	2.03896	0.279265	0.597183	0.802683	15.4644	18.3359	5.09833	14.3724	17.6325	16.0416	3.46641	15.8742	7.42091
BJN34_01400	hypothetical protein	-0.360425	2.49871	0.615116	0.432868	0.582089	-0.883838	2.49871	3.45913	0.0629032	0.220975	0.523413	2.49871	1.20394	0.272536	0.549676	6.05693	12.3608	4.6211	7.81438	3.35702	4.88062	8.03571	7.59046	7.93426
BJN34_01405	TetR/AcrR family transcriptional regulator	-0.0642354	3.03212	0.0228281	0.879905	0.927174	-0.324918	3.03212	0.57166	0.4496	0.710576	0.260683	3.03212	0.37672	0.539364	0.764237	11.8886	14.675	8.66421	12.931	4.64992	12.5774	11.0371	10.8224	8.71249
BJN34_01415	porin	0.239685	3.80483	0.502311	0.478486	0.624866	0.183212	3.80483	0.293593	0.587927	0.803238	0.0564738	3.80483	0.0293613	0.863947	0.946515	11.4964	10.7855	12.5055	10.6642	12.7112	10.9494	5.46323	11.7407	7.15768
BJN34_01420	CDP-diacylglycerol pyrophosphatase	-0.140383	1.21067	0.0345357	0.852572	0.912256	0.431051	1.21067	0.355294	0.551132	0.780854	-0.571433	1.21067	0.639336	0.423951	0.683544	4.18253	3.19158	6.86231	12.5051	2.44245	7.31649	2.64494	1.17535	8.09326
BJN34_01425	N-acetyltransferase GCN5	N/A	N/A	N/A	N/A	N/A	N/A	N/A	N/A	N/A	N/A	N/A	N/A	N/A	N/A	N/A	2.13013	2.73826	1.36046	2.09632	3.51131	1.16753	1.42289	1.56757	2.76031
BJN34_01430	hypothetical protein	0.190783	1.29591	0.0821999	0.774338	0.860458	-0.398746	1.29591	0.330212	0.565534	0.790643	0.589529	1.29591	0.777755	0.377829	0.646287	1.7162	4.86253	2.74182	1.53933	1.76838	2.43641	2.23711	3.87902	0.462838
BJN34_01435	TetR/AcrR family transcriptional regulator	-0.256501	2.23358	0.337082	0.561518	0.698644	-0.536131	2.23358	1.41593	0.234075	0.50349	0.27963	2.23358	0.385642	0.534599	0.760564	4.71731	6.40947	6.59997	5.84849	4.76534	4.31227	5.82402	8.32685	3.52367
BJN34_01440	hypothetical protein	-0.22327	1.93133	0.261843	0.608857	0.737789	-0.271465	1.93133	0.387297	0.533724	0.770915	0.0481957	1.93133	0.0123946	0.911354	0.964036	6.58929	6.65887	3.97573	4.8245	4.44384	7.31112	6.12231	4.08837	5.37471
BJN34_01445	diguanylate cyclase	1.20908	3.09581	0.516672	0.472265	0.61978	-1.51297	3.09581	0.789058	0.374385	0.646122	2.72205	3.09581	2.36522	0.124066	0.354969	34.2198	17.0673	3.26465	0	0	7.95984	7.59873	10.0919	0
BJN34_0145	RNA-directed DNA polymerase	0.82046	8.27488	6.90098	0.00861485	0.0273746	0.318947	8.27488	1.05208	0.30503	0.582013	0.501513	8.27488	2.60874	0.106276	0.323028	457.417	489.05	214.484	295.65	247.397	275.638	117.814	241.143	170.79
BJN34_01450	IS5 family transposase	1.48098	2.90576	9.58012	0.00196695	0.00799248	-0.629367	2.90576	1.43382	0.231141	0.498948	2.11035	2.90576	18.4459	1.75e-05	0.000438507	12.4219	16.0079	6.61186	2.54434	2.43469	2.89846	1.05299	3.36339	5.53069
BJN34_01455	CBS domain-containing protein	0.175954	2.80482	0.120999	0.727954	0.827508	0.197211	2.80482	0.152774	0.695899	0.866185	-0.0212572	2.80482	0.00185843	0.965614	0.988356	7.14371	6.41235	2.8657	5.26042	3.82895	7.68793	5.90843	1.95422	3.09425
BJN34_01460	hypothetical protein	0.405872	1.7013	0.408334	0.522816	0.66556	0.641024	1.7013	1.05579	0.304177	0.581159	-0.235152	1.7013	0.158227	0.690794	0.857276	4.12741	10.5653	6.00403	4.43734	7.69143	12.7949	1.51371	6.81371	4.7118
BJN34_01465	DUF3562 domain-containing protein	0.00100834	2.33414	3.12e-06	0.99859	0.9988	-0.789581	2.33414	1.78191	0.181914	0.435688	0.790589	2.33414	1.82933	0.176206	0.431572	12.0336	23.047	5.68973	7.49452	8.61019	6.60352	4.84174	18.4229	9.14152
BJN34_01470	hypothetical protein	-0.721923	6.8945	8.33715	0.00388424	0.0141253	-0.649921	6.8945	6.78808	0.00917686	0.058214	-0.0720025	6.8945	0.0830966	0.773144	0.900614	188.034	192.818	181.843	205.388	163.497	239.891	188.087	331.66	245.616
BJN34_01475	metal-chelation protein CHAD	0.0721219	1.75636	0.00536509	0.94161	0.967331	0.578513	1.75636	0.349799	0.554227	0.782359	-0.506391	1.75636	0.275031	0.599977	0.804586	2.57823	3.44922	1.08763	5.53155	4.01797	0.597683	3.42801	1.50659	0
BJN34_01480	diguanylate cyclase	0.615281	4.5472	1.87464	0.170945	0.300013	0.595644	4.5472	1.75756	0.184929	0.440016	0.0196363	4.5472	0.00198709	0.964445	0.988281	21.1383	18.4542	6.31406	16.5441	16.7247	11.1763	8.31837	4.42567	10.4577
BJN34_01485	hypothetical protein	-0.201264	3.00417	0.313284	0.575672	0.711724	-0.930506	3.00417	6.03997	0.0139855	0.0786643	0.729242	3.00417	3.74717	0.0528969	0.21208	22.8108	32.4391	22.3716	10.7671	18.3378	18.2967	26.5566	21.2285	23.8152
BJN34_01490	hypothetical protein	-0.0408218	4.88097	0.00985413	0.920926	0.954821	-0.137662	4.88097	0.111831	0.738069	0.887596	0.0968405	4.88097	0.0558149	0.813237	0.921689	120.849	85.7931	29.7134	60.0824	83.5776	72.074	74.3742	55.6709	57.9875
BJN34_01495	hypothetical protein	-0.517509	5.17482	1.35351	0.244665	0.390877	-1.31585	5.17482	8.39358	0.00376548	0.0301413	0.798341	5.17482	3.13077	0.0768275	0.266376	154.395	102.718	29.1586	55.58	37.6659	68.8987	90.5464	123.05	108.131
BJN34_0150	hypothetical protein	0.628477	3.4319	3.46482	0.0626875	0.139351	-0.112767	3.4319	0.102948	0.74832	0.892724	0.741244	3.4319	4.96911	0.025804	0.132838	31.9774	31.222	18.5256	16.9672	11.7614	20.2387	10.0851	17.3575	15.6202
BJN34_01500	hypothetical protein	0.134934	1.70126	0.05159	0.820319	0.890963	-0.382243	1.70126	0.385643	0.534599	0.771519	0.517177	1.70126	0.752471	0.385695	0.653426	13.0133	7.29981	2.32125	3.90855	6.70812	4.06017	7.28149	5.12196	3.28508
BJN34_01505	hypothetical protein	0.0891351	4.79136	0.0375689	0.846311	0.908369	-1.50547	4.79136	9.89724	0.00165527	0.0159182	1.5946	4.79136	11.142	0.000843956	0.0117813	114.464	86.7415	19.5823	24.4204	18.7828	28.4228	47.7777	59.8576	54.5539
BJN34_01515	hypothetical protein	0.687507	1.91387	1.32172	0.250283	0.397468	0.608945	1.91387	1.03247	0.30958	0.586465	0.0785617	1.91387	0.019829	0.888016	0.954237	20.2576	14.6132	10.3558	15.3028	15.3066	10.7207	5.95593	13.7661	0.957833
BJN34_01520	hypothetical protein	-1.79649	6.30824	49.9603	1.57e-12	5.38e-11	-0.749695	6.30824	9.43835	0.00212495	0.019258	-1.0468	6.30824	17.2438	3.29e-05	0.000779589	64.5796	60.6433	61.6903	128.751	126.303	142.044	193.861	143.596	190.346
BJN34_01525	DUF72 domain-containing protein	0.31396	1.73499	0.258114	0.611419	0.740245	-0.0141913	1.73499	0.000505593	0.982061	0.99066	0.328151	1.73499	0.295905	0.586461	0.796225	3.62695	4.95317	0.800308	1.76189	1.64532	3.8449	1.61652	1.84159	2.3293
BJN34_01530	hypothetical protein	-0.958308	5.98701	11.4089	0.000730949	0.00350491	-0.626949	5.98701	4.98416	0.0255805	0.120326	-0.33136	5.98701	1.36925	0.241942	0.517677	75.5978	79.3451	48.2846	72.6138	69.3983	118.189	114.828	108.962	92.5691
BJN34_01535	hypothetical protein	N/A	N/A	N/A	N/A	N/A	N/A	N/A	N/A	N/A	N/A	N/A	N/A	N/A	N/A	N/A	0	1.00852	0.952925	1.04559	0	0.346129	1.27257	2.03179	0
BJN34_01540	hypothetical protein	-0.137475	3.46286	0.154967	0.693833	0.802422	0.268241	3.46286	0.621269	0.430576	0.694907	-0.405717	3.46286	1.44769	0.228899	0.503302	7.15495	5.64851	4.62959	6.33032	9.25183	8.03021	4.2317	4.2495	7.15445
BJN34_01545	transposase	0.35616	3.28547	0.727828	0.393588	0.5469	0.546414	3.28547	1.74403	0.186629	0.44239	-0.190254	3.28547	0.226934	0.633807	0.824437	8.32826	4.64369	2.89864	6.03528	7.37955	4.49959	3.23562	2.95981	3.45749
BJN34_0155	hypothetical protein	-0.562535	5.71055	4.51852	0.0335299	0.0844221	-0.133612	5.71055	0.261082	0.609378	0.8177	-0.428923	5.71055	2.65178	0.103434	0.317202	111.889	129.879	2.66141	147.081	110.34	169.793	133.728	118.224	116.655
BJN34_01550	hypothetical protein	0.169222	3.42517	0.13494	0.713364	0.817699	0.071275	3.42517	0.023847	0.877275	0.953871	0.097947	3.42517	0.046557	0.829167	0.930193	8.35241	7.27083	2.57613	4.54428	5.5117	6.72315	4.81952	5.64994	2.34058
BJN34_01555	hypothetical protein	-0.0315037	2.72622	0.002826	0.957604	0.975812	0.729334	2.72622	1.58235	0.208422	0.469763	-0.760838	2.72622	1.75631	0.185085	0.444976	7.56722	5.69637	71.4568	7.79786	12.1178	6.91583	1.59668	8.75623	2.67496
BJN34_01560	hypothetical protein	0.412367	5.52393	1.23184	0.267049	0.41533	0.755201	5.52393	4.13856	0.0419169	0.169035	-0.342834	5.52393	0.876358	0.349201	0.623519	18.8032	19.0224	13.7331	24.1158	17.3784	25.1135	13.1107	12.8343	4.74607
BJN34_01565	cytochrome B	-0.559971	2.34252	1.1201	0.289896	0.440088	-0.538098	2.34252	1.04367	0.306969	0.583115	-0.0218737	2.34252	0.00167834	0.967322	0.988742	4.41073	6.93462	4.13449	4.64803	4.05162	7.33147	10.1462	3.94694	4.04241
BJN34_01570	molybdopterin-binding protein	0.552636	2.77369	1.85618	0.173066	0.30268	0.107147	2.77369	0.0662077	0.796941	0.914639	0.445489	2.77369	1.29392	0.255326	0.531853	8.04152	11.077	6.90096	9.5242	4.35228	5.58809	4.62563	5.70011	3.7039
BJN34_01575	pentapeptide MXKDX repeat protein	0.245908	3.75853	0.268049	0.604644	0.735257	0.160571	3.75853	0.114136	0.735483	0.886112	0.0853363	3.75853	0.0331116	0.855609	0.943158	33.4036	53.3296	28.3988	23.5805	39.3067	46.268	10.4361	44.5739	24.8331
BJN34_01580	hypothetical protein	0.309859	6.65383	0.302101	0.582568	0.717741	-1.12947	6.65383	3.89972	0.0482941	0.186014	1.43933	6.65383	6.25715	0.0123693	0.0829895	455.073	345.449	57.7294	84.2531	72.9425	152.33	162.008	240.817	134.127
BJN34_01585	hypothetical protein	-0.355521	3.79409	0.86844	0.351387	0.50352	-0.342214	3.79409	0.809185	0.368361	0.639955	-0.0133068	3.79409	0.00121661	0.972175	0.990426	57.2418	34.3713	39.3869	58.5093	27.566	51.8481	35.0122	65.6793	36.9051
BJN34_01590	MerR family transcriptional regulator	0.542935	5.25875	3.4647	0.0626919	0.139351	0.192102	5.25875	0.429595	0.512188	0.758539	0.350833	5.25875	1.48915	0.222349	0.495987	99.7486	133.933	62.7497	69.4381	74.4774	89.1644	38.8616	68.148	57.8815
BJN34_01595	TetR family transcriptional regulator	2.3738	5.25157	16.931	3.88e-05	0.000273873	2.453	5.25157	18.0043	2.2e-05	0.000456912	-0.0792063	5.25157	0.0218079	0.882599	0.953516	64.2779	103.746	41.0534	102.799	46.2088	74.4807	1.75305	14.9435	15.7903
BJN34_0160	hypothetical protein	N/A	N/A	N/A	N/A	N/A	N/A	N/A	N/A	N/A	N/A	N/A	N/A	N/A	N/A	N/A	0.38577	99.4698	0.381613	0	37.9646	70.207	0	6.2739	0
BJN34_01600	MFS transporter	3.25056	6.30658	19.8398	8.42e-06	7.39e-05	3.22139	6.30658	19.5325	9.89e-06	0.00022903	0.0291699	6.30658	0.00194152	0.964854	0.988356	81.9062	4.87879	48.3427	120.545	1.91526	173.542	0.640957	2.20474	12.7019
BJN34_01605	bacterioferritin	1.01653	6.21378	4.91872	0.0265672	0.0697197	0.840848	6.21378	3.38103	0.0659509	0.228356	0.175679	6.21378	0.151591	0.69702	0.860586	243.516	217.832	67.5323	175.273	115.445	6.94122	32.2987	106.084	71.8483
BJN34_01615	N-acetylglutamate synthase	1.1422	6.41307	9.13924	0.00250185	0.00977032	0.299904	6.41307	0.637953	0.424453	0.688431	0.842295	6.41307	5.07098	0.0243296	0.128203	305.245	302.373	154.549	177.839	98.6838	151.35	46.5995	92.0732	141.867
BJN34_01620	cation transporter	0.799132	5.04741	7.42404	0.00643583	0.0214968	-0.130464	5.04741	0.190805	0.662248	0.848842	0.929596	5.04741	10.1548	0.00143929	0.0174835	46.5605	45.2061	33.3657	23.8017	20.0959	22.7941	18.9859	12.3334	26.4033
BJN34_01625	PLP-dependent aminotransferase family protein	0.573644	5.82868	1.93038	0.164717	0.291322	0.661037	5.82868	2.56334	0.109367	0.317909	-0.0873928	5.82868	0.0457912	0.830556	0.930479	44.7799	35.0681	31.9723	36.3442	38.2621	46.4836	7.17783	34.7509	20.734
BJN34_01630	aspartate aminotransferase family protein	2.16417	8.33832	36.1337	1.84e-09	3.79e-08	1.84553	8.33832	26.8077	2.25e-07	7.67e-06	0.318641	8.33832	0.85974	0.353812	0.626866	406.259	359.137	197.065	230.834	201.186	345.48	31.1056	64.9421	78.6514
BJN34_01635	methylmalonate-semialdehyde dehydrogenase (acylating)	2.28673	7.89027	54.78	1.35e-13	5.19e-12	2.09807	7.89027	46.6572	8.46e-12	4.65e-10	0.188665	7.89027	0.418281	0.517796	0.748168	226.881	239.948	132.26	187.535	137.833	205.529	19.6953	42.5436	37.6284
BJN34_01645	amino acid permease	-0.473525	4.44078	2.27829	0.131197	0.246447	-0.0632767	4.44078	0.0421092	0.837412	0.934747	-0.410248	4.44078	1.74163	0.186932	0.447861	11.6746	13.0443	7.2782	13.8909	17.0905	11.8811	11.0788	9.63302	15.205
BJN34_0165	type II toxin-antitoxin system RelE/ParE family toxin	-0.476593	3.06737	1.6965	0.192746	0.326621	-1.25767	3.06737	10.5934	0.00113491	0.0118151	0.781079	3.06737	3.98644	0.0458678	0.193298	24.3286	28.9258	18.4255	13.7134	10.1531	18.4852	16.1314	30.7935	35.8121
BJN34_01650	PLP-dependent aminotransferase family protein	0.162122	5.27434	0.358688	0.549236	0.687811	0.185282	5.27434	0.470139	0.492923	0.745038	-0.0231602	5.27434	0.0075305	0.930848	0.973693	22.6051	30.123	20.5818	30.6546	19.6671	25.6261	12.2582	19.9841	21.2179
BJN34_01655	DUF2917 domain-containing protein	0.0564662	3.10061	0.0295321	0.863556	0.917531	0.3755	3.10061	1.3918	0.238101	0.509302	-0.319034	3.10061	1.07348	0.30016	0.576581	20.0168	21.1838	15.4449	22.2029	20.8717	29.6649	12.1815	17.9312	14.34
BJN34_01660	methylmalonyl-CoA mutase	1.35635	7.30659	27.4001	1.65e-07	2.16e-06	0.715915	7.30659	7.74756	0.00537852	0.0395824	0.640439	7.30659	6.38231	0.0115264	0.0792537	62.6064	72.5207	51.4035	48.2268	33.1562	40.623	13.4173	21.128	25.0569
BJN34_01665	HIT family protein	-0.775077	6.5875	6.84251	0.00890138	0.0281558	0.142251	6.5875	0.237109	0.626302	0.82737	-0.917328	6.5875	9.61556	0.00192935	0.0220443	114.99	97.5696	153.482	235.345	277.919	202.6	161.13	176.045	182.978
BJN34_01670	3-hydroxybutyryl-CoA dehydrogenase	-0.579944	9.1261	3.64389	0.0562753	0.128077	-0.316981	9.1261	1.09468	0.295437	0.57076	-0.262962	9.1261	0.753045	0.385514	0.653279	406.603	368.251	585.103	538.317	656.303	500.512	476.015	651.895	574.947
BJN34_01675	hypothetical protein	-0.499558	3.34793	1.76663	0.1838	0.316025	0.207256	3.34793	0.331977	0.564498	0.789453	-0.706813	3.34793	3.74037	0.0531126	0.212134	16.54	29.447	30.0498	47.1621	36.7258	45.4348	25.55	24.371	39.183
BJN34_01680	hypothetical protein	-0.0341038	3.31335	0.00620219	0.937228	0.965445	0.441325	3.31335	1.08285	0.298061	0.573589	-0.475428	3.31335	1.28428	0.257105	0.533433	16.4037	10.3627	25.2114	28.7419	18.3815	30.1319	13.7638	13.4003	17.0904
BJN34_01685	IS5 family transposase	0.138315	3.95301	0.226877	0.63385	0.758516	0.0203136	3.95301	0.00485601	0.944444	0.978649	0.118002	3.95301	0.172504	0.677896	0.850278	16.8895	16.6975	9.77821	13.4674	10.9763	15.9567	10.0706	10.6073	10.8004
BJN34_01690	hypothetical protein	-0.375326	2.22864	0.786127	0.375274	0.528666	-0.206927	2.22864	0.249709	0.61728	0.822724	-0.168399	2.22864	0.161972	0.687348	0.855816	13.155	7.06928	8.95239	15.8741	7.99042	10.3303	8.82481	11.2286	10.6096
BJN34_01695	DUF3293 domain-containing protein	0.196008	3.82588	0.374182	0.540733	0.680472	0.600854	3.82588	3.67357	0.0552815	0.202031	-0.404846	3.82588	1.77454	0.182822	0.441373	34.1991	28.8314	16.3297	38.7282	27.7334	40.263	15.7761	18.745	20.3237
BJN34_0170	hypothetical protein	N/A	N/A	N/A	N/A	N/A	N/A	N/A	N/A	N/A	N/A	N/A	N/A	N/A	N/A	N/A	5.00474	2.71149	1.78369	1.44417	57.951	1.03827	5.00866	1.48704	1.40318
BJN34_01700	Crp/Fnr family transcriptional regulator	-0.214126	5.92566	0.892268	0.344864	0.496973	-0.415678	5.92566	3.33425	0.0678514	0.231782	0.201551	5.92566	0.787142	0.374966	0.643755	90.567	73.3205	70.038	64.6973	0	85.6373	68.6914	77.6166	73.995
BJN34_01705	long-chain fatty acid--CoA ligase	2.08529	5.73854	59.7879	1.06e-14	4.57e-13	1.35556	5.73854	25.3238	4.85e-07	1.56e-05	0.729732	5.73854	8.51555	0.00352125	0.0341473	38.2818	43.5444	33.5889	29.1957	16.7869	25.2351	5.86329	7.47346	8.63141
BJN34_01710	ABC transporter ATP-binding protein	2.79465	4.01691	53.1203	3.14e-13	1.17e-11	2.05193	4.01691	27.6758	1.43e-07	4.99e-06	0.742727	4.01691	5.30476	0.0212672	0.117615	19.8827	25.5532	26.0209	19.3789	11.5171	13.449	1.79151	2.95822	3.23631
BJN34_01715	branched-chain amino acid ABC transporter permease	2.66036	3.1705	15.4344	8.54e-05	0.000546128	2.20135	3.1705	10.6154	0.00112152	0.0116949	0.459009	3.1705	0.594707	0.440605	0.694615	9.90654	9.74	16.5072	14.2029	6.81419	6.73778	2.04843	0	2.39899
BJN34_01720	branched-chain amino acid ABC transporter permease	1.86668	3.21517	21.8215	2.99e-06	2.93e-05	1.46262	3.21517	12.9309	0.000323203	0.00432855	0.404063	3.21517	1.37899	0.240273	0.516245	10.2867	8.03841	11.9241	9.53415	7.24338	6.89641	1.8458	2.71307	1.95965
BJN34_01725	ABC transporter permease	1.91567	4.85987	39.0936	4.04e-10	9.58e-09	1.39	4.85987	20.3762	6.36e-06	0.000152418	0.525671	4.85987	3.5197	0.0606435	0.230206	29.235	27.4906	27.8358	22.944	19.7808	17.1363	3.56286	8.59963	6.09659
BJN34_01730	ABC transporter ATP-binding protein	2.05666	3.58223	16.7286	4.31e-05	0.000301319	1.56326	3.58223	9.60821	0.0019371	0.0180876	0.493397	3.58223	1.16766	0.279883	0.557672	19.26	19.9148	16.2311	13.3826	16.5453	9.642	2.93304	6.82823	0.652652
BJN34_01735	phenylacetate--CoA ligase family protein	0.128088	4.1317	0.228373	0.632733	0.758123	0.135176	4.1317	0.256058	0.612841	0.818856	-0.00708791	4.1317	0.000742232	0.978265	0.99333	11.4392	13.5562	11.1696	12.2586	13.2749	11.4767	8.6802	8.73107	9.40267
BJN34_01740	DDE transposase	-0.6239	5.84021	4.13654	0.0419669	0.101388	-0.18767	5.84021	0.381792	0.536646	0.773628	-0.43623	5.84021	2.03645	0.153568	0.399913	27.8919	27.8222	30.3543	40.7247	40.0869	39.0727	47.4442	26.3017	33.0976
BJN34_01745	DUF454 domain-containing protein	0.927234	5.11396	10.5836	0.00114095	0.00507707	1.03129	5.11396	13.1613	0.000285798	0.00392632	-0.104056	5.11396	0.14711	0.701313	0.862962	75.3546	86.8201	69.5664	62.2137	80.0933	111.225	25.9729	34.2306	38.7724
BJN34_0175	hypothetical protein	-0.727363	8.5216	3.39255	0.0654914	0.144406	-0.480499	8.5216	1.49038	0.222158	0.487422	-0.246865	8.5216	0.394207	0.530096	0.758345	12.5755	1170.98	1545.13	1762.81	1366.41	1291.34	1961.43	14.932	1960.8
BJN34_01750	2-nitropropane dioxygenase	0.192163	7.85917	0.507469	0.476237	0.623457	0.218517	7.85917	0.656492	0.417801	0.68389	-0.026354	7.85917	0.00959836	0.921955	0.970597	245.89	217.774	183.941	159.449	248.185	260.396	110.051	180.504	173.67
BJN34_01755	two-component system sensor histidine kinase CreC	-0.254359	4.61466	1.02887	0.310425	0.46273	0.184119	4.61466	0.565622	0.452004	0.712748	-0.438477	4.61466	3.21014	0.0731833	0.259724	838.954	13.715	10.4742	17.5968	16.0121	17.3067	9.3174	921.194	11.5612
BJN34_01760	two-component system response regulator CreB	-0.4895	5.38429	4.03496	0.0445667	0.106585	-0.130523	5.38429	0.295107	0.586966	0.802612	-0.358977	5.38429	2.19713	0.138268	0.374998	38.9287	45.6311	41.6585	67.2403	44.502	55.4213	47.528	50.2255	47.1201
BJN34_01765	FAD-binding protein	-1.23831	1.06639	2.73408	0.0982278	0.197364	-0.574801	1.06639	0.671383	0.41257	0.679145	-0.663511	1.06639	0.755818	0.38464	0.652757	0	0.962077	0.697507	0.984032	1.52813	0.532892	1.76525	1.10869	0.760888
BJN34_01770	IS110 family transposase	0.443395	5.34832	2.77636	0.0956654	0.193624	0.249377	5.34832	0.873556	0.349973	0.624378	0.194018	5.34832	0.550456	0.458132	0.707901	41.5566	40.7296	25.9203	33.798	24.7509	37.3711	16.8648	28.0154	19.3453
BJN34_01775	sigma-54-dependent Fis family transcriptional regulator	1.1885	5.19891	10.9209	0.000950831	0.00435709	0.524171	5.19891	2.12173	0.145223	0.379638	0.664327	5.19891	3.58036	0.0584664	0.224154	37.5459	45.4973	21.951	23.2899	18.2513	25.1515	6.73651	19.7509	10.7967
BJN34_01780	two-component sensor histidine kinase	0.317647	5.64263	1.77849	0.182335	0.314364	0.251399	5.64263	1.1136	0.291301	0.566157	0.0662484	5.64263	0.0800249	0.777264	0.902679	30.0212	22.5796	18.7485	24.308	20.0817	24.9025	11.6495	18.3166	16.5092
BJN34_01785	C4-dicarboxylate transporter DctA	-1.52058	3.98847	6.7675	0.00928328	0.0291243	-1.32935	3.98847	5.25275	0.0219121	0.109068	-0.191226	3.98847	0.107711	0.742765	0.885486	9.7589	8.26056	1.30257	3.77052	8.07651	9.54018	11.1662	11.3308	21.2058
BJN34_01790	ferredoxin	-0.780176	6.00404	8.58515	0.00338915	0.0125826	-0.162625	6.00404	0.38523	0.534818	0.771576	-0.617551	6.00404	5.4232	0.0198709	0.11195	111.982	138.459	115.913	167.264	207.298	198.614	183.231	134.178	191.406
BJN34_01795	alpha/beta hydrolase	-0.679091	5.56211	4.26391	0.0389303	0.0954849	-0.247865	5.56211	0.580008	0.446309	0.708934	-0.431225	5.56211	1.73059	0.188335	0.450132	45.1621	57.4838	42.0615	66.3754	75.3215	56.56	77.6255	39.0549	68.9486
BJN34_01800	peptidase	-0.799498	8.146	7.53139	0.00606333	0.0203996	-0.203064	8.146	0.493475	0.482381	0.736009	-0.596434	8.146	4.21612	0.0400417	0.179565	144.828	133.69	153.481	174.374	294.195	197.714	181.499	194.938	243.137
BJN34_01805	DUF493 domain-containing protein	-0.46789	5.48955	2.56129	0.109509	0.214314	0.127012	5.48955	0.194208	0.659437	0.848842	-0.594903	5.48955	4.20089	0.0404027	0.180451	96.3526	86.2203	104.1	125.328	191.611	125.82	96.5332	128.05	102.044
BJN34_01810	23S rRNA methyltransferase	-0.823085	5.86231	8.45128	0.00364786	0.0133568	-0.0348994	5.86231	0.015797	0.899981	0.962983	-0.788186	5.86231	7.82167	0.00516235	0.0449047	29.1587	28.8486	26.041	40.0215	59.5383	47.6056	47.0531	37.8127	34.7731
BJN34_01815	ATP-dependent DNA helicase	0.19771	6.10402	0.465124	0.495239	0.641138	0.588485	6.10402	4.14421	0.0417771	0.168569	-0.390775	6.10402	1.85945	0.172688	0.42702	26.454	25.4216	27.6472	35.5952	40.5269	30.5125	18.5512	13.6874	24.4085
BJN34_01820	TlpA family protein disulfide reductase	-0.064228	6.1306	0.0292828	0.864128	0.917531	0.464001	6.1306	1.53491	0.215378	0.479436	-0.528229	6.1306	1.99442	0.15788	0.404575	83.4548	112.709	94.358	95.8834	224.909	100.763	82.66	79.3581	85.4762
BJN34_01825	thioredoxin	-0.168792	4.34133	0.327788	0.566965	0.703697	0.223905	4.34133	0.59831	0.439224	0.701862	-0.392697	4.34133	1.86069	0.172545	0.426867	30.658	38.0657	20.8622	40.013	41.0934	37.6718	27.7788	21.4153	31.4836
BJN34_01830	hypothetical protein	-0.347022	3.69715	0.907412	0.340802	0.492839	-0.494755	3.69715	1.8287	0.176281	0.426774	0.147734	3.69715	0.162172	0.687165	0.855802	14.1371	15.3872	19.7445	14.5626	18.5564	12.581	20.0949	13.6685	17.8328
BJN34_01835	lysine transporter LysE	-0.446635	5.04474	1.86512	0.172036	0.30141	-0.0795617	5.04474	0.0604508	0.805785	0.919001	-0.367074	5.04474	1.27369	0.259076	0.535314	28.33	34.8312	40.6346	35.2004	57.8706	45.1665	38.4032	31.8823	46.3732
BJN34_01840	hypothetical protein	0.416616	4.26592	1.62766	0.202027	0.337965	-0.28489	4.26592	0.727897	0.393566	0.663837	0.701505	4.26592	4.61331	0.0317247	0.154582	109.799	141.794	81.5384	58.916	65.0406	81.5217	38.1802	89.6656	72.9755
BJN34_01845	GntR family transcriptional regulator	-1.67088	6.76582	14.6268	0.000131038	0.000784866	-1.07767	6.76582	6.30134	0.0120646	0.0706731	-0.593211	6.76582	1.91423	0.166494	0.417229	48.5057	41.3813	108.199	109.5	86.4375	124.624	191.194	212.687	130.349
BJN34_01850	phosphoenolpyruvate--protein phosphotransferase	-0.965786	2.91338	2.72168	0.0989937	0.198446	-0.570874	2.91338	0.986495	0.3206	0.595522	-0.394912	2.91338	0.453112	0.500861	0.734737	1.29693	1.56589	1.88978	3.26459	2.28392	1.03936	4.22646	2.00956	1.27299
BJN34_01855	PTS N-acetyl-D-glucosamine transporter	-1.2058	2.27381	5.34848	0.0207404	0.0571453	-0.50832	2.27381	1.06198	0.302765	0.57942	-0.697479	2.27381	1.75546	0.185191	0.445076	1.91138	0.915371	1.16096	3.32785	0.903679	2.25848	2.86476	1.93965	2.62992
BJN34_01860	porin	-1.24649	2.91178	7.33944	0.00674577	0.0222948	-0.412731	2.91178	0.896079	0.343835	0.617503	-0.833759	2.91178	3.26275	0.0708703	0.254912	4.21702	3.7229	1.7411	6.2303	7.93233	3.35082	5.43402	8.37785	5.43654
BJN34_01865	N-acetylglucosamine-6-phosphate deacetylase	-0.290217	4.31624	0.54926	0.45862	0.605893	0.119126	4.31624	0.0946197	0.758384	0.896819	-0.409344	4.31624	1.11365	0.291289	0.567657	16.4212	14.9143	7.88742	18.6739	17.6537	15.7961	6.16608	20.4343	12.4724
BJN34_01870	iron dicitrate transport regulator FecR	0.198047	3.42457	0.21051	0.646368	0.767923	-0.12179	3.42457	0.0780431	0.779967	0.904602	0.319837	3.42457	0.557512	0.455264	0.705914	14.0247	10.6524	4.6901	6.75207	8.04281	8.34866	3.76387	10.1719	6.59032
BJN34_01875	glucose-6-phosphate dehydrogenase	0.189552	4.41782	0.441503	0.506398	0.651971	0.0568427	4.41782	0.0394399	0.84258	0.937042	0.132709	4.41782	0.224189	0.635866	0.825461	14.1145	14.8627	10.3443	13.1944	9.87126	13.5199	7.61845	12.8543	7.628
BJN34_01880	glucose-6-phosphate isomerase	0.591262	3.95044	3.47599	0.0622655	0.13867	0.381401	3.95044	1.42797	0.232097	0.500635	0.209861	3.95044	0.475102	0.490649	0.727308	12.0366	7.40015	8.6085	9.36867	6.03548	9.55531	4.15516	5.91115	5.12979
BJN34_01890	hypothetical protein	1.11439	6.4164	12.7664	0.000352911	0.00187966	0.590433	6.4164	3.60931	0.057457	0.207745	0.523962	6.4164	2.92712	0.0871028	0.286508	58.0203	64.8392	37.8738	38.0412	36.3541	38.164	10.9021	29.4334	20.4676
BJN34_01895	hypothetical protein	1.14697	6.00014	22.1121	2.57e-06	2.57e-05	0.540806	6.00014	4.88437	0.0271009	0.125348	0.606163	6.00014	6.53632	0.0105694	0.0750587	68.4699	80.39	55.8211	41.0318	52.8608	41.4643	23.4027	26.0936	25.0653
BJN34_0190	DUF433 domain-containing protein	0.409427	1.5335	0.262568	0.608361	0.737522	1.43656	1.5335	3.54187	0.0598379	0.213786	-1.02714	1.5335	2.01508	0.155743	0.402159	8.52052	59.5299	39.116	37.1399	53.71	41.6133	6.53925	8.73499	20.0354
BJN34_01900	hypothetical protein	0.966603	4.88412	12.027	0.000524368	0.00263861	0.581284	4.88412	4.28557	0.0384372	0.160132	0.38532	4.88412	2.07298	0.149928	0.395167	65.3874	67.2504	46.6206	43.2641	57.1812	37.4622	22.3659	24.3355	0
BJN34_01905	hypothetical protein	0.921804	5.87563	12.4739	0.000412687	0.00215331	0.725829	5.87563	7.72808	0.00543687	0.0399102	0.195975	5.87563	0.598176	0.439275	0.69395	52.4877	16.198	1.5468	11.4414	17.3285	30.0466	20.2825	23.7925	27.3588
BJN34_01910	hypothetical protein	-1.03433	0.935787	0.623494	0.429752	0.579174	-1.05537	0.935787	0.649463	0.420305	0.685557	0.0210445	0.935787	0.000261012	0.98711	0.997046	3.13344	0	0	2.12672	0	0.959617	1.22198	0.721552	3.32659
BJN34_01915	acriflavin resistance protein	1.30196	2.92214	9.66523	0.00187788	0.00766654	0.818247	2.92214	3.64077	0.056381	0.204925	0.483711	2.92214	1.60645	0.204991	0.471391	4.06002	2.232	1.91696	2.31177	1.49692	2.1608	1.01834	0.983928	0.676804
BJN34_01920	hypothetical protein	N/A	N/A	N/A	N/A	N/A	N/A	N/A	N/A	N/A	N/A	N/A	N/A	N/A	N/A	N/A	1.31957	0.91811	0.460368	0.461917	0.44884	0	0	0	0
BJN34_01925	TolC family protein	0.782596	1.79644	0.821708	0.364681	0.517747	1.099	1.79644	1.64567	0.19955	0.457814	-0.3164	1.79644	0.151301	0.697295	0.860772	1.81286	1.42588	1.9363	4.10555	1.3304	1.37381	1.96267	0.174621	0.108344
BJN34_01930	DNA-binding response regulator	-0.116333	4.52451	0.161133	0.688116	0.798343	0.288891	4.52451	1.02766	0.310709	0.587319	-0.405224	4.52451	2.05121	0.152086	0.398044	28.8465	31.4084	18.0994	39.0785	28.6112	38.0833	23.4785	26.6818	17.8204
BJN34_01935	hypothetical protein	0.00859502	4.6276	0.000871335	0.976451	0.986682	0.171655	4.6276	0.352494	0.552704	0.78155	-0.16306	4.6276	0.325275	0.568455	0.786161	16.7864	16.5947	11.8251	15.9191	15.6534	19.8498	11.5636	16.1042	8.53046
BJN34_01940	MFS transporter	0.147583	3.91483	0.171833	0.678488	0.790963	0.266407	3.91483	0.566261	0.451749	0.71255	-0.118824	3.91483	0.117098	0.732204	0.878492	11.1541	14.933	5.92444	8.78022	10.8681	15.0273	6.59618	8.48991	7.69723
BJN34_01945	histidine biosynthesis protein	-0.118831	5.44367	0.270817	0.602784	0.733898	-0.260886	5.44367	1.29708	0.254747	0.527946	0.142055	5.44367	0.3886	0.533036	0.759568	132.382	131.166	103.385	115.27	97.7552	125.876	97.147	132.002	94.1546
BJN34_0195	DUF1917 domain-containing protein	0.606321	3.65796	2.52943	0.111741	0.217404	-0.0218915	3.65796	0.00316031	0.955169	0.981666	0.628212	3.65796	2.79895	0.0943263	0.300698	31.9837	35.0374	17.5375	13.3673	13.3682	28.4706	12.9849	15.0116	16.4225
BJN34_01950	hypothetical protein	0.398215	4.13459	1.55327	0.212654	0.351851	0.320186	4.13459	1.00229	0.316756	0.591521	0.0780296	4.13459	0.0634087	0.801187	0.915141	73.3547	49.4399	40.3599	60.3461	38.4894	58.6259	25.7685	44.4342	30.4623
BJN34_01955	transposase	-0.366648	5.88529	2.59173	0.107423	0.211366	0.0146726	5.88529	0.0042458	0.948047	0.979931	-0.381321	5.88529	2.84819	0.0914771	0.295286	32.3476	35.1177	26.016	44.3169	37.662	41.8027	28.7584	28.8074	40.1985
BJN34_01960	hypothetical protein	0.280634	4.01719	0.901251	0.342447	0.494391	0.123119	4.01719	0.171579	0.678712	0.855993	0.157515	4.01719	0.299234	0.584363	0.795073	47.8831	41.2171	28.9529	38.3738	29.3445	39.2873	21.1419	34.4235	22.5619
BJN34_01965	very short patch repair endonuclease	-0.189218	7.93588	0.598018	0.439335	0.587477	0.0273946	7.93588	0.0125766	0.910708	0.967584	-0.216612	7.93588	0.786183	0.375257	0.644095	43.2561	42.7524	40.5151	48.7164	48.7495	53.0536	26.0765	49.9569	43.4193
BJN34_01970	hypothetical protein	0.345278	6.42126	1.82553	0.176656	0.30702	0.409496	6.42126	2.5733	0.108681	0.316835	-0.0642181	6.42126	0.0646156	0.799344	0.914517	47.9566	58.6041	45.9766	48.3335	43.5695	72.0828	27.4433	39.5536	31.1127
BJN34_01975	XRE family transcriptional regulator	-0.434105	7.80642	3.22981	0.072309	0.15568	-0.0745712	7.80642	0.096081	0.756584	0.896098	-0.359534	7.80642	2.22342	0.135931	0.371424	84.2846	72.1516	70.215	100.815	91.5337	105.072	55.7308	103.442	93.6731
BJN34_01980	hypothetical protein	-1.2551	5.74642	20.9152	4.8e-06	4.46e-05	-0.404568	5.74642	2.30673	0.128815	0.352585	-0.850527	5.74642	9.68109	0.00186174	0.0213776	132.126	116.562	153.35	223.493	274.006	250.024	286.208	259.69	241.06
BJN34_01985	site-specific DNA-methyltransferase	-1.03896	8.53449	16.3479	5.27e-05	0.000355401	-0.561677	8.53449	4.86425	0.0274187	0.126444	-0.477282	8.53449	3.49975	0.0613781	0.231694	117.217	122.299	141.076	186.06	194.264	165.627	225.246	196.298	219.073
BJN34_01990	hypothetical protein	-0.647404	8.77912	7.72786	0.00543752	0.0186107	-0.266243	8.77912	1.3194	0.2507	0.52322	-0.381162	8.77912	2.69329	0.100771	0.312242	106.289	120.708	125.826	156.547	162.395	153.993	142.749	157.226	154.32
BJN34_01995	hypothetical protein	-0.591538	7.34203	4.10783	0.042685	0.102658	-0.650203	7.34203	4.95597	0.0260008	0.121642	0.0586649	7.34203	0.040509	0.840489	0.935739	76.1179	102.24	81.9475	89.2502	105.961	57.9477	88.1925	116.187	117.583
BJN34_0200	hypothetical protein	0.402153	4.59523	0.867199	0.351732	0.503805	0.245069	4.59523	0.321444	0.570741	0.792582	0.157084	4.59523	0.135254	0.713045	0.869365	139.698	152.691	43.2092	144.799	43.0477	70.5912	18.3413	200.371	39.9925
BJN34_02000	hypothetical protein	-0.640484	7.39301	4.74413	0.0293984	0.0759532	-0.79727	7.39301	7.31228	0.00684849	0.046996	0.156786	7.39301	0.284829	0.593553	0.80017	182.632	182.766	147.762	166.554	183.48	114.308	137.108	275.152	246.976
BJN34_02005	hypothetical protein	-0.638847	7.42823	4.65393	0.0309826	0.0793649	-0.995899	7.42823	11.1541	0.000838441	0.0093635	0.357052	7.42823	1.45099	0.22837	0.503257	88.6358	80.9074	135.269	70.7612	124.164	79.0412	144.59	73.2214	202.377
BJN34_02010	sigma-70 family RNA polymerase sigma factor	-0.193896	8.42343	0.708857	0.399823	0.552681	-0.120659	8.42343	0.274875	0.60008	0.810407	-0.0732374	8.42343	0.101354	0.750211	0.888398	503.048	581.874	360.461	554.504	453.468	532.602	343.625	485.342	514.246
BJN34_02015	hypothetical protein	0.0263262	7.38317	0.0145513	0.903985	0.943076	-0.124584	7.38317	0.325218	0.568488	0.791537	0.150911	7.38317	0.479776	0.488524	0.725711	402.499	443.75	326.68	390.944	310.372	374.845	249.135	373.509	316.039
BJN34_02020	ImmA/IrrE family metallo-endopeptidase	0.155364	7.85228	0.398763	0.527729	0.66972	0.162423	7.85228	0.436036	0.509042	0.755543	-0.00705884	7.85228	0.000827885	0.977046	0.992992	270.435	292.128	191.761	283.486	209.022	277.846	128.056	228.296	196.486
BJN34_02025	helix-turn-helix domain-containing protein	0.0408126	3.90056	0.0109197	0.916775	0.951294	0.20661	3.90056	0.284043	0.594064	0.806358	-0.165798	3.90056	0.186961	0.665458	0.843734	27.7858	35.082	37.5444	36.0241	32.3785	48.5696	21.2341	43.3176	16.4451
BJN34_02030	transposase	0.319346	2.82818	0.504398	0.477574	0.624499	-0.153071	2.82818	0.110823	0.739209	0.88782	0.472417	2.82818	1.12661	0.288501	0.565246	13.7606	17.7045	4.48293	7.31337	8.61722	9.79415	5.91974	9.61998	7.20175
BJN34_02035	hypothetical protein	0.848413	2.44502	3.62022	0.0570812	0.129329	0.85207	2.44502	3.67697	0.0551689	0.20179	-0.00365694	2.44502	8.32e-05	0.992721	0.998779	14.1183	20.5561	9.39181	13.732	9.90959	20.6021	6.351	6.43213	6.17173
BJN34_02040	XRE family transcriptional regulator	0.18618	5.40569	0.467321	0.494222	0.640439	-0.262711	5.40569	0.913636	0.339152	0.614574	0.448891	5.40569	2.71838	0.0991988	0.310232	105.518	134.518	117.673	97.481	85.3564	84.8891	70.1432	118.194	69.1587
BJN34_02045	magnesium chelatase subunit ChlI	-1.39398	1.92349	5.77378	0.016267	0.0465809	-1.0728	1.92349	3.63105	0.056711	0.2058	-0.321178	1.92349	0.280327	0.596487	0.802424	8.31585	7.71511	4.53529	8.10319	5.16739	14.11	18.2106	21.4963	5.98134
BJN34_0205	hypothetical protein	0.701784	3.49981	3.14938	0.075956	0.161672	0.159198	3.49981	0.156256	0.692628	0.864723	0.542587	3.49981	1.98132	0.159251	0.407184	51.7151	5.85484	27.1528	32.3634	23.6011	43.2843	19.2074	32.7355	18.9673
BJN34_02050	phosphoheptose isomerase	-0.221054	7.57316	0.85097	0.356278	0.508318	-0.338977	7.57316	1.99685	0.157627	0.398761	0.117923	7.57316	0.242252	0.622584	0.819672	689.155	611.42	455.618	561.177	505.746	572.427	507.46	699.512	445.382
BJN34_02055	hypothetical protein	-5.5714	6.26456	86.9558	1.11e-20	6.46e-19	-4.3427	6.26456	61.0914	5.45e-15	3.89e-13	-1.22871	6.26456	5.20643	0.0225035	0.121588	3.18061	66.1357	5.13023	9.55013	13.9785	10.9654	61.0614	313.134	216.335
BJN34_02060	nitrogen regulatory protein P-II 1	-3.91197	4.10071	25.2525	5.03e-07	6.04e-06	-3.03879	4.10071	16.8961	3.95e-05	0.000755169	-0.873182	4.10071	1.39413	0.237709	0.513381	7.92976	6.45397	6.39	7.21386	8.01939	23.7645	19.5406	191.082	66.6573
BJN34_02065	ammonia channel protein	-1.57078	5.43719	10.4045	0.0012571	0.00549507	-1.79504	5.43719	13.3835	0.000253847	0.00357971	0.224257	5.43719	0.215643	0.64238	0.831062	15.0639	13.9916	15.5566	15.815	10.83	12.6491	9.87633	57.2724	45.6399
BJN34_02070	glutamate--cysteine ligase	0.193491	8.73762	0.480179	0.488341	0.634981	0.348938	8.73762	1.56036	0.211613	0.473871	-0.155447	8.73762	0.310956	0.577094	0.791404	325.398	296.78	248.531	262.779	439.352	271.958	174.509	226.341	219.025
BJN34_02075	glutathione synthase	0.426629	7.67669	2.41531	0.120155	0.22982	0.442653	7.67669	2.60084	0.106807	0.31416	-0.0160245	7.67669	0.00344617	0.953188	0.983507	205.809	228.153	165.284	165.336	257.135	187.45	85.7624	143.327	136.156
BJN34_02080	PTS fructose transporter subunit IIA	-0.555209	6.88831	4.75606	0.0291953	0.0755694	-0.33208	6.88831	1.71704	0.190075	0.44643	-0.223129	6.88831	0.771324	0.379808	0.647731	161.972	188.778	202.562	222.416	236.385	206.922	213.479	196.796	259.03
BJN34_02085	phosphocarrier protein HPr	-0.149836	6.57621	0.421005	0.516436	0.659799	-0.0132256	6.57621	0.00329975	0.954192	0.981446	-0.13661	6.57621	0.35321	0.552301	0.773803	264.514	289.493	301.714	344.336	295.956	329.889	255.551	285.277	236.545
BJN34_02090	phosphoenolpyruvate--protein phosphotransferase	-0.143019	7.83654	0.471049	0.492505	0.639075	0.171652	7.83654	0.68198	0.408906	0.676859	-0.31467	7.83654	2.29404	0.129872	0.362633	110.438	108.48	84.9424	124.584	118.769	141.156	88.3813	97.482	85.2449
BJN34_02095	bacterioferritin	-0.0926604	6.41424	0.120389	0.728613	0.827849	-0.442316	6.41424	2.71559	0.0993722	0.298894	0.349655	6.41424	1.70581	0.19153	0.454591	282.385	272.703	215.445	150.797	196.837	266.231	163.385	232.243	275.094
BJN34_0210	GNAT family N-acetyltransferase	-0.621728	4.51173	4.89082	0.0269998	0.070706	-0.592656	4.51173	4.47592	0.0343758	0.148113	-0.029072	4.51173	0.0104779	0.91847	0.96843	41.3777	41.4178	28.2706	44.3726	32.3745	38.1253	34.007	63.4342	42.9872
BJN34_02100	bacterioferritin	-0.216184	9.32962	0.212267	0.644996	0.766819	-0.393552	9.32962	0.701845	0.402164	0.67162	0.177367	9.32962	0.142918	0.705398	0.866196	1614.18	1668.07	336.19	710.026	979.873	1450.64	923.164	1167.95	1204.07
BJN34_02105	selenide, water dikinase SelD	-0.916098	6.04487	0.864429	0.352502	0.504074	-1.92651	6.04487	3.62213	0.057016	0.206582	1.01041	6.04487	1.04414	0.306861	0.583912	43.8158	36.2343	62.292	69.7791	3.31156	1.86959	91.0217	62.6539	66.4127
BJN34_02110	tRNA 2-selenouridine(34) synthase MnmH	-0.904559	6.15173	8.66705	0.00324015	0.0121204	-0.272376	6.15173	0.809026	0.368408	0.639955	-0.632182	6.15173	4.26573	0.0388885	0.176567	36.4169	32.7052	43.0635	60.4553	70.5637	47.9733	65.7491	46.8225	59.3587
BJN34_02115	molybdopterin biosynthesis protein MoeB	0.147808	5.48858	0.354497	0.551578	0.690099	0.0693653	5.48858	0.0779501	0.780095	0.904602	0.0784428	5.48858	0.102132	0.749286	0.888398	65.8574	51.3342	39.7752	51.1351	56.1127	42.3213	35.084	41.4511	37.5162
BJN34_02120	peptidase S41	-0.14457	8.96152	0.433519	0.510267	0.654922	0.00886275	8.96152	0.00163191	0.967777	0.98644	-0.153432	8.96152	0.489268	0.484254	0.723716	265.087	264.039	229.286	265.381	309.573	282.757	196.667	229.543	258.366
BJN34_02125	phosphoglyceromutase	-1.411	7.48792	32.7433	1.05e-08	1.89e-07	-0.844216	7.48792	12.1037	0.00050322	0.00621086	-0.566779	7.48792	5.39625	0.02018	0.11314	137.622	125.784	105.203	174.085	211.265	166.663	282.706	238.308	268.173
BJN34_02130	sulfurtransferase	-0.876745	6.41935	8.87124	0.00289698	0.0110577	-0.0813346	6.41935	0.0787382	0.779015	0.904602	-0.79541	6.41935	7.34837	0.00671237	0.0544859	124.964	132.161	98.3324	173.125	282.395	163.936	182.436	173.416	170.169
BJN34_02135	glutaredoxin 3	-0.201022	6.40434	0.264503	0.607043	0.736365	0.505731	6.40434	1.68083	0.194814	0.452042	-0.706753	6.40434	3.2721	0.0704672	0.254122	252.241	276.506	160.294	285.972	604.674	218.618	193.275	218.652	224.674
BJN34_02140	protein-export chaperone SecB	-1.47963	8.48803	21.7672	3.08e-06	3.01e-05	-0.403891	8.48803	1.69337	0.193157	0.449973	-1.07573	8.48803	11.7161	0.000619626	0.00926629	257.337	309.48	343.435	554.536	864.533	547.374	657.245	597.116	840.908
BJN34_02145	glycerol-3-phosphate dehydrogenase	-1.2807	6.63805	13.2315	0.000275283	0.00151515	-0.650599	6.63805	3.523	0.0605227	0.214902	-0.630097	6.63805	3.25935	0.0710171	0.255029	50.92	37.1695	62.7524	75.4545	109.54	55.1312	97.0246	99.6768	107.851
BJN34_0215	hypothetical protein	-0.148686	6.02214	0.0722694	0.788061	0.868322	-1.91974	6.02214	11.1245	0.000851939	0.00946842	1.77106	6.02214	9.55845	0.00199031	0.0225547	327.786	275.419	37.8994	80.0443	34.9339	61.9264	109.756	286.849	183.322
BJN34_02150	ABC transporter substrate-binding protein	-0.774632	5.81355	7.9695	0.00475721	0.0167033	-0.357205	5.81355	1.73738	0.187471	0.444081	-0.417428	5.81355	2.32463	0.127341	0.360033	40.6261	31.3053	37.8596	46.8359	61.1909	41.4695	45.8115	48.1825	60.3669
BJN34_02155	tRNA (uridine(34)/cytosine(34)/5- carboxymethylaminomethyluridine(34)-2'-O)- methyltransferase TrmL	-0.431819	4.86772	1.82831	0.176327	0.306756	0.172899	4.86772	0.303702	0.581571	0.799202	-0.604718	4.86772	3.6682	0.0554602	0.217198	46.6284	38.0656	55.0306	58.6666	49.8072	96.1947	54.5423	30.4628	47.7298
BJN34_02160	amidophosphoribosyltransferase	0.690166	2.12875	1.91551	0.166352	0.293757	0.211702	2.12875	0.169942	0.680163	0.856731	0.478465	2.12875	1.01266	0.314267	0.590338	4.59556	5.39999	8.19835	3.93302	3.48139	6.23707	2.04166	4.8074	2.29199
BJN34_02165	amidophosphoribosyltransferase	-0.78055	4.70752	5.39379	0.0202085	0.0559472	-0.300326	4.70752	0.827214	0.363079	0.635756	-0.480223	4.70752	2.05355	0.151852	0.397965	20.4382	12.468	12.8705	26.8077	20.6098	17.4478	25.4376	15.6926	21.8761
BJN34_02170	DUF2244 domain-containing protein	-0.877865	8.59475	8.3675	0.0038199	0.0139352	-0.305468	8.59475	1.02928	0.310328	0.587022	-0.572397	8.59475	3.58752	0.058215	0.223685	367.752	449.84	537.949	858.343	559.339	686.798	733.28	542.956	772.63
BJN34_02175	cytochrome c oxidase subunit II	-1.08465	9.79091	12.4768	0.000412048	0.00215176	-0.844304	9.79091	7.63176	0.00573493	0.0412772	-0.240345	9.79091	0.625362	0.429062	0.686896	379.136	359.702	515.977	576.182	491.11	476.977	715.583	565.349	924.186
BJN34_02180	cytochrome c oxidase subunit I	-0.783352	9.9544	10.7851	0.00102318	0.00463948	-0.639465	9.9544	7.21951	0.00721153	0.0485254	-0.143887	9.9544	0.367761	0.544228	0.768086	461.613	395.204	409.042	539.37	438.031	456.263	465.387	595.787	731.833
BJN34_02185	cytochrome c oxidase assembly protein	-0.37514	7.60789	3.14794	0.0760227	0.161715	-0.0483593	7.60789	0.0527783	0.818297	0.924533	-0.32678	7.60789	2.40059	0.121289	0.349628	227.4	253.25	219.765	332.117	282.113	284.582	212.547	267.67	263.257
BJN34_02190	DUF2970 domain-containing protein	-0.217245	5.97058	0.97246	0.324067	0.476213	-0.203838	5.97058	0.859225	0.353956	0.62873	-0.0134075	5.97058	0.0037275	0.951317	0.982682	235.971	215.401	231.019	229.75	242.512	233.778	187.284	242.391	221.435
BJN34_02195	cytochrome c oxidase subunit 3	-0.906462	8.78177	14.9659	0.000109474	0.000677997	-0.996099	8.78177	18.0128	2.19e-05	0.000456448	0.0896369	8.78177	0.147959	0.700494	0.862568	334.981	332.772	376.022	353.961	296.942	363.89	442.394	561.798	615.018
BJN34_0220	GNAT family N-acetyltransferase	N/A	N/A	N/A	N/A	N/A	N/A	N/A	N/A	N/A	N/A	N/A	N/A	N/A	N/A	N/A	27.2062	45.7951	0.816121	0.907111	60.5378	61.7918	0.539543	44.7878	27.7218
BJN34_02200	twin transmembrane helix small protein	-0.374028	3.57281	0.902325	0.342159	0.494079	0.195438	3.57281	0.259927	0.610171	0.81813	-0.569466	3.57281	2.18142	0.139685	0.377204	0	0	36.9749	40.1039	0	67.4473	43.8441	0	0
BJN34_02205	cytochrome c oxidase assembly protein	-0.454578	5.71613	2.92955	0.0869717	0.17988	0.137738	5.71613	0.27686	0.598767	0.810213	-0.592317	5.71613	5.05425	0.0245656	0.128858	52.8292	39.9017	43.8586	85.4423	64.3193	5.89452	55.5027	43.2066	52.9925
BJN34_02210	cytochrome C oxidase subunit I	-0.672537	5.16103	6.09578	0.0135505	0.0401644	-0.570654	5.16103	4.43776	0.0351524	0.150539	-0.101884	5.16103	0.138747	0.70953	0.867573	42.3172	37.0387	36.2279	49.6197	35.1782	42.4955	58.7678	40.5946	49.2405
BJN34_02215	heme A synthase	-0.540007	5.52057	4.59185	0.0321243	0.0815654	-0.158419	5.52057	0.405724	0.524148	0.765331	-0.381588	5.52057	2.31517	0.128117	0.360745	31.9843	26.1224	26.9606	40.0119	41.8584	30.7206	33.1589	31.0605	36.247
BJN34_02220	protoheme IX farnesyltransferase	-0.976955	5.97066	10.4431	0.0012311	0.00540189	-0.394353	5.97066	1.75532	0.18521	0.440533	-0.582602	5.97066	3.74222	0.0530541	0.212134	40.818	35.0867	39.2829	58.0064	69.8127	47.8218	70.3903	45.6321	67.6526
BJN34_02225	cytochrome c oxidase assembly protein	-1.74016	5.84104	7.00917	0.00810934	0.026007	0.330218	5.84104	0.270184	0.603208	0.813045	-2.07038	5.84104	9.74892	0.00179428	0.020845	27.8164	27.6741	27.6884	43.6869	261.099	42.2621	68.2672	80.9155	80.3942
BJN34_02230	RNA polymerase factor sigma-32	0.823555	9.44486	6.62146	0.0100757	0.0311309	1.18811	9.44486	13.6022	0.000225916	0.00324531	-0.364557	9.44486	1.31596	0.251318	0.528271	716.854	703.72	645.045	731.168	1043.61	929.266	171.089	442.359	358.243
BJN34_02235	pirin family protein	-0.139059	7.06673	0.248527	0.618114	0.745873	0.318194	7.06673	1.30831	0.252702	0.524965	-0.457253	7.06673	2.70149	0.100255	0.311703	123.327	110.416	110.397	151.494	190.042	139.155	66.4525	132.034	115.73
BJN34_02240	DNA-binding protein YbiB	0.117315	6.96451	0.227697	0.633237	0.758123	-0.129183	6.96451	0.275119	0.599919	0.810407	0.246498	6.96451	1.00833	0.315304	0.591324	129.594	109.658	114.102	92.7574	107.508	103.632	61.9232	108.487	98.446
BJN34_02245	nitrate ABC transporter ATP-binding protein	-0.0256876	1.13843	0.00106834	0.973925	0.984929	0.440365	1.13843	0.328757	0.566392	0.791066	-0.466052	1.13843	0.383429	0.535774	0.761276	2.10434	1.16749	0.922704	1.31484	3.25452	1.607	0.148189	2.81616	0.651886
BJN34_0225	hypothetical protein	N/A	N/A	N/A	N/A	N/A	N/A	N/A	N/A	N/A	N/A	N/A	N/A	N/A	N/A	N/A	0.414517	1.07532	0.754491	0.870866	1.12449	0.392631	5.21992	2.08092	1.94257
BJN34_02250	nitrate ABC transporter, permease protein	0.39832	1.33419	0.142278	0.706027	0.812203	-0.0844439	1.33419	0.00631712	0.936651	0.97539	0.482763	1.33419	0.212295	0.644974	0.83188	0	0	0	0	0	1.12866	0	0	0
BJN34_02255	nitrate transporter	-1.50662	1.33774	7.06282	0.00786999	0.0253833	-1.43989	1.33774	6.64043	0.00996901	0.0616849	-0.0667348	1.33774	0.0107253	0.917516	0.96769	1.62825	1.73703	2.71485	3.92561	3.2688	4.54555	1.4939	2.52305	1.51532
BJN34_02260	ANTAR domain-containing protein	-1.13095	2.90438	9.07461	0.00259183	0.0100819	-1.48256	2.90438	14.8185	0.000118367	0.00188407	0.351605	2.90438	0.739486	0.389826	0.656643	8.09226	6.55498	5.78794	5.03867	3.93791	7.46886	9.2843	10.7824	18.0481
BJN34_02265	5-carboxymethyl-2-hydroxymuconate isomerase	-0.0327699	8.17175	0.0125023	0.910971	0.947366	-0.396581	8.17175	1.82252	0.177014	0.427799	0.363812	8.17175	1.53642	0.215151	0.487309	307.6	335.446	483.362	293.829	338.657	278.299	312.207	309.459	336.644
BJN34_02270	maleylacetoacetate isomerase	-0.18891	7.5611	0.281467	0.595741	0.728259	-0.438433	7.5611	1.51006	0.21913	0.484368	0.249522	7.5611	0.490453	0.483725	0.723238	181.765	189.567	369.197	221.628	241.88	192.888	212.828	229.871	271.498
BJN34_02275	signal recognition particle-docking protein FtsY	-1.5576	6.5152	17.7973	2.46e-05	0.00018414	-0.888056	6.5152	6.01775	0.0141627	0.0792746	-0.669549	6.5152	3.37805	0.06607	0.243809	27.7331	29.4844	55.2016	70.939	61.9952	55.9773	99.8796	73.965	103.331
BJN34_02280	peptidase M16	0.701025	8.9433	7.24579	0.00710675	0.0232889	0.600932	8.9433	5.33637	0.0208849	0.10563	0.100093	8.9433	0.149779	0.698747	0.861489	380.506	371.749	234.929	282.094	302.503	343.227	110.35	204.467	179.678
BJN34_02285	peptidase M16	1.11461	8.09454	11.2145	0.000811595	0.00382799	1.09017	8.09454	10.7396	0.00104867	0.0111365	0.0244361	8.09454	0.00556398	0.940539	0.97781	251.013	218.337	168.498	185.141	214.06	234.984	37.463	110.86	94.8983
BJN34_02290	16S rRNA (guanine(966)-N(2))-methyltransferase RsmD	0.168424	5.98283	0.447642	0.503457	0.649271	0.572213	5.98283	5.22398	0.0222775	0.110023	-0.403789	5.98283	2.6588	0.102978	0.316477	103.961	100.097	60.638	106.342	121.488	123.984	53.1369	78.694	57.3339
BJN34_02295	pantetheine-phosphate adenylyltransferase	-0.912889	8.39502	9.44037	0.00212261	0.0085348	-0.335978	8.39502	1.30073	0.254081	0.527197	-0.576911	8.39502	3.8056	0.0510813	0.207563	416.081	413.574	410.594	714.007	594.372	590.491	803.412	444.932	628.139
BJN34_0230	ArsR family transcriptional regulator	0.284956	4.2651	1.06878	0.301222	0.452716	0.250242	4.2651	0.826166	0.363383	0.636013	0.0347138	4.2651	0.0169386	0.896449	0.95692	56.5438	42.9751	54.414	56.6967	50.4726	47.2653	32.2401	33.875	36.3909
BJN34_02300	ferredoxin	-0.989048	7.21058	14.5941	0.000133331	0.000796533	-0.502319	7.21058	3.84668	0.0498445	0.189816	-0.486729	7.21058	3.5703	0.0588216	0.224893	348.478	363.627	305.559	532.63	486.821	433.773	597.615	417.915	615.21
BJN34_02305	aminoacyl-tRNA hydrolase	-0.847676	6.02136	8.83693	0.00295195	0.0112181	-0.604735	6.02136	4.56407	0.0326493	0.143715	-0.24294	6.02136	0.727733	0.393619	0.659269	68.4265	77.7405	64.5045	90.6948	84.6579	79.5994	124.506	72.7481	107.644
BJN34_02310	50S ribosomal protein L25/general stress protein Ctc	-2.87857	10.6435	44.751	2.24e-11	6.32e-10	-1.64834	10.6435	16.071	6.1e-05	0.00106945	-1.23023	10.6435	9.13072	0.00251352	0.0266518	504.966	405.919	925.559	1569.68	1506.7	1486.72	4868.6	3313.7	3018.13
BJN34_02315	ribose-phosphate pyrophosphokinase	-2.27636	9.01273	22.5044	2.1e-06	2.16e-05	-1.16583	9.01273	6.32172	0.0119268	0.0699839	-1.11054	9.01273	5.73018	0.0166757	0.100508	162.806	162.871	198.944	437.125	459.325	268.164	1085.7	325.296	617.056
BJN34_02325	4-(cytidine 5'-diphospho)-2-C-methyl-D-erythritol kinase	-0.999601	8.01619	11.6287	0.000649411	0.0031688	0.118531	8.01619	0.167963	0.681928	0.857706	-1.11813	8.01619	14.5219	0.000138536	0.00272458	125.672	173.29	146.071	381.951	306.68	304.49	301.215	193.984	221.322
BJN34_02330	lipoprotein localization factor LolB	0.324848	5.05709	1.65668	0.198052	0.333166	0.338951	5.05709	1.8117	0.178304	0.429269	-0.0141032	5.05709	0.00329106	0.954252	0.983783	57.9783	49.1865	43.929	45.0008	45.0235	65.5294	28.8763	38.4954	30.2534
BJN34_02335	hypothetical protein	0.110219	8.29327	0.252617	0.615238	0.743316	0.224128	8.29327	1.04545	0.306558	0.583115	-0.113909	8.29327	0.27132	0.602448	0.805018	168.424	131.919	122.781	142.341	150.724	172.711	92.5939	121.098	105.136
BJN34_02340	DNA-formamidopyrimidine glycosylase	-0.407685	4.7675	1.25296	0.262988	0.411416	0.00869073	4.7675	0.000581729	0.980758	0.990256	-0.416376	4.7675	1.32468	0.249754	0.526423	28.8531	19.8167	16.0046	28.1388	36.6654	21.825	24.1093	14.6716	29.9289
BJN34_02345	GTPase	0.306503	8.28852	0.99326	0.318947	0.471173	-0.184947	8.28852	0.361295	0.547788	0.778494	0.49145	8.28852	2.54822	0.110419	0.329401	202.025	215.22	94.104	109.093	125.029	127.725	74.8297	144.735	113.585
BJN34_0235	hypothetical protein	-0.107514	3.37257	0.0820388	0.774553	0.86056	-0.868518	3.37257	4.94929	0.0261013	0.121783	0.761005	3.37257	3.86317	0.0493569	0.202577	19.0219	18.3542	16.0324	169.333	157.673	16.9738	18.2446	16.3354	12.4075
BJN34_02350	A/G-specific adenine glycosylase	-0.831721	5.35927	6.38501	0.0115088	0.0349351	-0.23809	5.35927	0.540678	0.462152	0.720707	-0.593632	5.35927	3.27821	0.0702053	0.25374	25.4832	18.063	19.3045	32.4911	32.7021	31.6131	38.1068	18.592	32.7172
BJN34_02355	ATP-dependent protease	0.486877	7.06792	3.35139	0.0671481	0.146898	0.399908	7.06792	2.26287	0.132508	0.357555	0.0869693	7.06792	0.108723	0.741603	0.884731	215.145	242.946	149.04	7.74434	7.55592	253.443	94.1255	146.79	110.004
BJN34_02360	RNase adaptor protein RapZ	0.0175257	8.53908	0.00562945	0.940191	0.966862	0.0287273	8.53908	0.0151333	0.902093	0.963606	-0.0112017	8.53908	0.00230599	0.9617	0.987201	344.752	351.758	395.193	409.741	347.692	379.493	297.909	297.823	288.329
BJN34_02365	hypothetical protein	-0.0104266	9.48213	0.000824137	0.977098	0.986933	-0.827043	9.48213	5.11027	0.0237846	0.115649	0.816616	9.48213	4.98567	0.025558	0.131964	2718.5	2215.3	903.353	971.797	863.499	1467.37	1132.18	2081.8	1479.19
BJN34_02370	HPr kinase/phosphorylase	0.0653023	7.79276	0.0677789	0.794599	0.872609	0.00883541	7.79276	0.00124069	0.971902	0.987881	0.0564669	7.79276	0.0508709	0.821555	0.927179	229.253	259.423	135.803	183.109	190.063	230.738	160.773	168.229	146.743
BJN34_02375	PTS sugar transporter subunit IIA	-0.197506	7.62506	0.732713	0.392005	0.545686	-0.0337423	7.62506	0.0214636	0.883523	0.956312	-0.163764	7.62506	0.505996	0.476877	0.718964	387.308	368.238	291.47	394.802	343.378	457.79	355.873	291.389	316.581
BJN34_02380	ribosomal subunit interface protein	1.43262	11.6548	10.7133	0.00106369	0.0047918	0.991882	11.6548	5.23889	0.0220874	0.109551	0.440734	11.6548	1.05092	0.305296	0.581852	15314.9	14916.8	5281.81	8130.95	6658.72	11284.3	1830.31	5634.72	3150.15
BJN34_02385	RNA polymerase factor sigma-54	0.29113	10.0576	1.64777	0.199263	0.334399	0.365253	10.0576	2.592	0.107405	0.314981	-0.0741228	10.0576	0.107193	0.743363	0.885731	674.876	689.026	607.719	757.06	594.725	777.072	416.409	503.151	391.76
BJN34_02390	LPS export ABC transporter ATP-binding protein	-0.446288	6.88046	4.31497	0.0377784	0.0930156	-0.491284	6.88046	5.22754	0.022232	0.110023	0.044996	6.88046	0.0437941	0.834237	0.932407	120.6	113.07	111.225	118.585	107.509	116.362	117.96	119.731	146.179
BJN34_02395	lipopolysaccharide transport periplasmic protein LptA	-0.810307	6.68406	10.5289	0.00117522	0.00521282	-0.489338	6.68406	3.90331	0.0481911	0.185892	-0.320969	6.68406	1.66069	0.19751	0.460147	102.844	102.605	103.325	136.568	126.301	133.339	169.516	124.285	144.068
BJN34_0240	hypothetical protein	-0.124977	2.69166	0.0626348	0.802379	0.878506	0.276337	2.69166	0.3196	0.571848	0.793323	-0.401315	2.69166	0.685989	0.407532	0.670954	120.675	117.291	9.20707	185.045	8.03273	154.11	8.48251	173.053	203.833
BJN34_02400	LPS export ABC transporter periplasmic protein LptC	-0.661136	5.97908	6.85853	0.00882192	0.0279472	-0.37773	5.97908	2.27929	0.131112	0.355451	-0.283406	5.97908	1.26396	0.260902	0.538286	64.7981	62.2787	75.703	100.45	76.5426	78.6447	86.0015	81.5846	96.3924
BJN34_02405	arabinose-5-phosphate isomerase	-0.890523	7.61227	13.1323	0.000290245	0.00159244	-0.563329	7.61227	5.32869	0.0209772	0.105942	-0.327193	7.61227	1.78909	0.181037	0.439055	17.2258	15.4283	137.692	27.348	148.222	21.4013	194.157	10.4081	19.0258
BJN34_02410	potassium transporter	-0.0940842	6.47063	0.179066	0.672177	0.787238	-0.0948624	6.47063	0.182384	0.669332	0.85302	0.000778122	6.47063	1.23e-05	0.997197	0.999512	40.0641	37.3373	36.3833	43.9742	33.0734	39.7368	26.0843	34.8476	38.8833
BJN34_02415	aryl-sulfate sulfotransferase	1.73283	6.64704	20.551	5.81e-06	5.3e-05	0.652288	6.64704	3.01179	0.0826608	0.264337	1.08054	6.64704	8.36583	0.00382342	0.0362649	498.607	560.436	161.735	163.541	165.434	241.915	79.1162	107.944	102.628
BJN34_02420	protease	3.13179	8.38121	20.4131	6.24e-06	5.63e-05	2.7602	8.38121	16.3557	5.25e-05	0.000944161	0.371591	8.38121	0.338981	0.560418	0.77934	1305.21	1134.85	95.0813	517.441	606.792	771.913	70.3505	85.0343	66.7912
BJN34_02425	adenine phosphoribosyltransferase	-0.257102	5.78385	1.09315	0.295774	0.446174	-0.117212	5.78385	0.229371	0.63199	0.830342	-0.13989	5.78385	0.326732	0.56759	0.786161	74.3927	74.3993	76.674	93.174	83.7614	78.1901	58.0429	69.3382	94.7287
BJN34_02430	lysine transporter LysE	-0.309653	4.89815	1.64587	0.199522	0.334582	-0.1011	4.89815	0.179563	0.671749	0.854125	-0.208553	4.89815	0.760746	0.383095	0.651572	39.3724	40.3284	31.091	42.2047	41.3846	46.9817	26.75	43.5483	41.9924
BJN34_02435	Na/Pi cotransporter family protein	-0.620659	6.72466	7.33145	0.00677585	0.0223729	-0.655202	6.72466	8.16899	0.00426127	0.033339	0.034543	6.72466	0.0226447	0.880385	0.952913	53.1617	45.8636	41.4221	48.4141	47.2776	43.6762	62.3467	60.0849	51.949
BJN34_02440	hypothetical protein	0.218082	3.84468	0.420305	0.516785	0.660066	-0.164429	3.84468	0.231804	0.630189	0.829024	0.382511	3.84468	1.3146	0.251563	0.52838	39.181	31.1826	15.8479	18.1772	21.2739	26.3859	19.9878	19.8563	18.7821
BJN34_02445	excinuclease ABC subunit A	-1.53966	7.56488	20.1891	7.02e-06	6.26e-05	-0.758458	7.56488	5.09551	0.0239879	0.116272	-0.7812	7.56488	5.34666	0.020762	0.115559	28.1713	23.8672	38.0844	50.6599	68.1998	41.2975	74.0943	59.15	83.8629
BJN34_0245	hypothetical protein	-1.71442	6.3745	35.3699	2.73e-09	5.44e-08	0.579528	6.3745	4.51085	0.0336806	0.146669	-2.29395	6.3745	62.4314	2.76e-15	1.65e-13	50.6999	182.727	191.092	361.503	277.023	374.752	157.352	208.39	173.383
BJN34_02450	MFS transporter	-1.11609	6.19859	8.78609	0.00303537	0.0114675	-0.64675	6.19859	3.01941	0.0822734	0.264099	-0.469337	6.19859	1.57449	0.209556	0.478394	36.4601	23.2854	38.8793	52.1176	50.8204	38.2598	75.2457	36.3353	62.3428
BJN34_02455	single-stranded DNA-binding protein	-1.41446	7.62071	28.4798	9.47e-08	1.31e-06	-1.08561	7.62071	17.1063	3.53e-05	0.000687445	-0.328842	7.62071	1.57788	0.209066	0.47759	182.495	63.1683	82.3812	241.683	259.626	214.026	452.712	330.077	421.33
BJN34_02460	hypothetical protein	-0.395247	2.38157	0.778488	0.377604	0.530997	-0.367144	2.38157	0.679214	0.409858	0.677292	-0.0281035	2.38157	0.00389236	0.950253	0.982616	11.9733	9.39541	5.95953	11.1313	12.0642	5.33814	7.92483	12.6571	8.65303
BJN34_02465	resolvase	2.01708	6.47326	17.3647	3.09e-05	0.000224289	1.38959	6.47326	8.50261	0.00354637	0.028753	0.62749	6.47326	1.82498	0.176721	0.432374	77.7839	82.616	22.5001	47.8336	46.1737	21.4151	13.9996	9.42046	11.3621
BJN34_02470	hypothetical protein	1.77278	5.34921	9.26553	0.00233507	0.00920732	1.31519	5.34921	5.19661	0.0226309	0.111132	0.457592	5.34921	0.666254	0.414361	0.677298	195.647	218.532	68.5713	137.263	156.045	49.5681	49.55	16.0223	42.4696
BJN34_02475	hypothetical protein	1.03038	2.67416	7.80507	0.00520999	0.018001	0.538013	2.67416	1.9588	0.161641	0.404483	0.492369	2.67416	2.16609	0.141085	0.37922	24.8319	26.4012	19.7541	20.3168	11.9191	18.6825	7.68588	10.7659	8.98933
BJN34_02480	maturase	N/A	N/A	N/A	N/A	N/A	N/A	N/A	N/A	N/A	N/A	N/A	N/A	N/A	N/A	N/A	0.813137	0	1.09904	2.64675	0.787992	0	0	0	2.32941
BJN34_02485	recombinase family protein	0.613826	6.3773	5.18213	0.0228204	0.0617461	0.48862	6.3773	3.28535	0.0699008	0.237074	0.125206	6.3773	0.221902	0.637595	0.827344	43.0688	44.9675	27.4008	33.8219	26.6171	46.9974	18.0272	24.5633	18.0538
BJN34_02490	hypothetical protein	N/A	N/A	N/A	N/A	N/A	N/A	N/A	N/A	N/A	N/A	N/A	N/A	N/A	N/A	N/A	1.03201	0.095175	1.41876	1.60172	3.343	4.8417	1.63481	1.41218	4.83265
BJN34_0250	hypothetical protein	2.5683	1.60733	10.5722	0.00114802	0.005102	2.78637	1.60733	12.8168	0.000343521	0.00453179	-0.218071	1.60733	0.138706	0.709571	0.867573	24.3568	52.1966	15.2937	7.46114	10.0739	13.6644	7.01607	10.8356	3.13773
BJN34_02500	arsenical resistance protein ArsH	0.521058	3.43173	1.89959	0.168124	0.295991	-0.598275	3.43173	2.26172	0.132607	0.357678	1.11933	3.43173	8.44548	0.00365951	0.0352903	12.5925	13.1687	21.218	8.27281	5.9268	8.2685	6.88705	10.0092	0
BJN34_02505	arsenate reductase (glutaredoxin)	0.791268	2.81032	2.85076	0.091331	0.186377	-0.0215581	2.81032	0.00197219	0.964578	0.98521	0.812826	2.81032	3.12811	0.0769527	0.266677	15.8879	14.6459	13.9097	30.3191	31.4991	33.1068	10.0976	2.40947	10.5389
BJN34_02510	arsenical-resistance protein	0.0773598	2.71959	0.0304959	0.86137	0.916711	-0.463729	2.71959	1.03648	0.308642	0.58517	0.541089	2.71959	1.46774	0.225703	0.499898	4.76971	4.18077	6.93578	2.52187	2.99215	5.71508	4.7743	4.46907	3.34364
BJN34_02515	transcriptional regulator	0.25232	1.36876	0.154021	0.694722	0.802913	-1.20704	1.36876	2.81289	0.0935096	0.287888	1.45936	1.36876	4.4088	0.035754	0.167158	3.0474	6.43325	9.87245	2.29814	3.7403	0.000408	4.41665	4.43691	4.58813
BJN34_02520	YnfA family protein	-1.04666	2.68452	2.65698	0.103096	0.204655	0.231995	2.68452	0.144155	0.704185	0.872388	-1.27866	2.68452	4.0726	0.043584	0.187018	3.36866	12.6009	6.60389	24.8931	11.818	22.8894	23.7191	9.28977	5.56433
BJN34_02525	porin	1.06952	1.52954	1.35212	0.244907	0.391031	0.671331	1.52954	0.526471	0.468094	0.725562	0.398184	1.52954	0.206299	0.649684	0.834698	3.00068	0.96661	3.16317	3.1919	0	2.20738	0.359266	0.820951	1.45185
BJN34_02530	ABC transporter substrate-binding protein	N/A	N/A	N/A	N/A	N/A	N/A	N/A	N/A	N/A	N/A	N/A	N/A	N/A	N/A	N/A	0	0	0.753917	3.74938	0	1.09793	0.498418	1.50346	1.60507
BJN34_02535	BMP family ABC transporter substrate-binding protein	0.146011	1.13419	0.0442872	0.83332	0.899721	1.13511	1.13419	3.36853	0.0664532	0.229144	-0.989095	1.13419	2.87628	0.0898934	0.291669	1.2387	1.00607	0.795128	1.69579	2.72729	2.21421	0.522159	1.19988	0.561755
BJN34_02540	GGDEF domain-containing protein	-0.135412	3.41296	0.107794	0.74267	0.838182	-1.00173	3.41296	5.44613	0.0196118	0.100736	0.866315	3.41296	4.1241	0.0422765	0.183783	9.0557	10.275	6.1136	7.45009	4.31055	2.1676	7.62634	7.02651	7.79082
BJN34_02545	hypothetical protein	0.910963	5.08615	3.77526	0.0520159	0.120334	-0.586032	5.08615	1.52982	0.21614	0.480433	1.49699	5.08615	9.89507	0.00165722	0.0195479	183.453	182.214	58.2978	51.8587	44.8233	51.3199	28.9251	105.55	47.1395
BJN34_0255	XRE family transcriptional regulator	0.890441	3.48941	5.19704	0.0226254	0.0612904	0.823013	3.48941	4.43825	0.0351423	0.150539	0.0674284	3.48941	0.0339266	0.853863	0.942475	2.19995	1.62301	1.53639	0.907502	0.424199	1.11583	5.37938	1.00202	0.80592
BJN34_02550	hypothetical protein	0.82265	2.42267	2.83378	0.0923008	0.187913	0.0833408	2.42267	0.0268592	0.86982	0.950496	0.739309	2.42267	2.4391	0.118344	0.344148	30.249	30.214	9.58682	9.76467	10.1532	19.9508	8.41698	11.7758	10.3973
BJN34_02555	collagen-like protein	0.173495	1.36408	0.0998832	0.75197	0.843454	-1.08927	1.36408	3.03818	0.0813269	0.262154	1.26277	1.36408	4.46998	0.0344954	0.163258	38.9532	31.0181	31.2312	30.0522	27.1987	40.8691	1.90376	20.6173	18.5703
BJN34_02560	potassium transporter Kef	0.18839	3.80818	0.193583	0.659951	0.778606	0.741733	3.80818	3.08277	0.0791254	0.257697	-0.553343	3.80818	1.78182	0.181927	0.440286	34.1353	18.6036	10.6457	31.5333	24.5632	36.6585	11.1567	10.7483	21.7576
BJN34_02565	hypothetical protein	0.00906656	4.80478	0.00106421	0.973976	0.984929	-0.0195105	4.80478	0.00493088	0.944018	0.978399	0.0285771	4.80478	0.0108063	0.917206	0.96751	22.6996	15.4978	10.9484	16.5412	13.1794	18.793	11.9733	14.1585	13.0818
BJN34_02570	hypothetical protein	-0.574769	5.54279	5.92261	0.0149478	0.0434686	-0.412167	5.54279	3.09239	0.0786592	0.256541	-0.162602	5.54279	0.473098	0.491566	0.727977	87.932	100.268	93.4744	97.3119	105.965	121.39	105.625	135.545	103.063
BJN34_02575	MurR/RpiR family transcriptional regulator	0.0818459	5.13818	0.0519236	0.819749	0.890484	0.915413	5.13818	6.59815	0.0102085	0.0626071	-0.833567	5.13818	5.55969	0.0183787	0.106195	28.2965	23.5444	26.8152	54.4995	29.7679	61.7579	12.5763	31.1962	17.6683
BJN34_02580	pilus assembly protein PilE	1.26003	3.09513	12.9676	0.000316925	0.00171571	0.86024	3.09513	5.72965	0.0166808	0.0891877	0.399792	3.09513	1.64724	0.199335	0.463465	18.4576	21.5052	13.8442	14.8292	12.0947	14.7083	3.6969	6.68725	7.95449
BJN34_02585	prepilin-type N-terminal cleavage/methylation domain-containing protein	1.4649	2.05765	5.27235	0.0216668	0.0592266	1.77233	2.05765	7.95924	0.00478424	0.0362374	-0.307428	2.05765	0.317108	0.573351	0.78943	7.53614	10.4179	3.36478	9.75162	7.825	8.44086	0.751605	0.01495	4.54865
BJN34_02590	type IV pilus modification protein PilV	0.483026	2.06201	0.699863	0.40283	0.555727	-0.114963	2.06201	0.0374531	0.846545	0.939665	0.597989	2.06201	1.10451	0.293279	0.57009	5.88455	5.79922	7.40733	6.17915	1.20055	5.95746	3.01798	6.02902	1.94438
BJN34_02595	pilus assembly protein PilW	0.316807	2.71179	0.224435	0.635681	0.75992	-0.40624	2.71179	0.356943	0.550209	0.780825	0.723047	2.71179	1.15932	0.281606	0.559334	8.01485	6.15104	4.4203	5.67266	0.009988	5.57608	2.58706	4.28604	4.97229
BJN34_0260	DNA-binding protein	N/A	N/A	N/A	N/A	N/A	N/A	N/A	N/A	N/A	N/A	N/A	N/A	N/A	N/A	N/A	2.03102	1.98265	3.29713	4.00429	9.13488	2.89193	2.45222	2.62838	2.90551
BJN34_02600	hypothetical protein	0.797984	1.97909	2.81319	0.0934924	0.189892	0.85982	1.97909	3.33623	0.0677697	0.231722	-0.0618365	1.97909	0.0223383	0.881191	0.953189	6.33445	7.24963	6.04829	7.06232	0.833262	5.03348	3.1124	0	0
BJN34_02605	pilus assembly protein PilY	0.450553	6.24037	3.24877	0.0714771	0.154273	0.27851	6.24037	1.23941	0.265586	0.541016	0.172043	6.24037	0.485374	0.485998	0.725216	29.0032	26.0764	18.7426	22.8159	17.4331	26.2982	16.0181	13.9697	13.093
BJN34_02610	aspartate aminotransferase	0.764789	6.41699	11.4545	0.0007132	0.00343646	-0.000655776	6.41699	8.3e-06	0.997701	0.998711	0.765445	6.41699	11.6309	0.000648654	0.0096173	97.965	90.6555	71.7994	45.2411	46.983	63.53	36.8516	46.9795	40.2516
BJN34_02615	ABC transporter permease	1.1814	4.52639	9.4492	0.00211241	0.00851357	1.11581	4.52639	8.43992	0.00367072	0.0295092	0.0655882	4.52639	0.0321278	0.857747	0.943754	16.2279	17.5011	15.1924	15.9325	12.9024	18.9657	1.99372	8.90474	6.85383
BJN34_02620	ABC transporter permease	1.36841	3.75584	9.21136	0.00240518	0.00944608	1.03549	3.75584	5.24018	0.022071	0.109548	0.332913	3.75584	0.613881	0.43333	0.690253	16.0299	14.4736	9.37962	14.3821	8.58317	8.97145	1.24998	6.18014	5.03157
BJN34_02625	multidrug ABC transporter ATP-binding protein	1.2976	4.59488	9.29088	0.00230298	0.0090963	0.836729	4.59488	3.86627	0.0492659	0.188337	0.460875	4.59488	1.26033	0.261588	0.539058	30.5189	41.9567	18.247	21.0016	13.6282	32.265	4.8723	14.5514	10.2283
BJN34_02630	secretion protein HlyD	1.17162	4.53616	3.61307	0.0573271	0.129752	0.927009	4.53616	2.27442	0.131524	0.356098	0.24461	4.53616	0.165167	0.684444	0.854049	34.3949	32.8169	13.4394	23.4023	15.9766	28.8369	1.87469	20.3875	6.893
BJN34_02635	TetR family transcriptional regulator	0.455549	4.61338	2.32215	0.127544	0.240958	-0.199439	4.61338	0.429098	0.512432	0.758539	0.654988	4.61338	4.83669	0.0278603	0.140806	34.5077	34.0865	41.6488	20.2315	23.3839	28.4287	18.3079	29.2808	18.9243
BJN34_02640	carbohydrate porin	-1.36717	5.51312	17.7372	2.54e-05	0.000189337	-0.487051	5.51312	2.38659	0.12238	0.340305	-0.880116	5.51312	7.42842	0.00642017	0.0526486	15.7497	18.2333	11.8756	29.0257	25.1788	31.8119	38.4101	19.2971	36.7554
BJN34_02645	NADPH-dependent 7-cyano-7-deazaguanine reductase QueF	-1.26096	6.70359	22.7673	1.83e-06	1.91e-05	-0.668346	6.70359	6.62146	0.0100757	0.0620679	-0.592615	6.70359	5.09295	0.0240233	0.127142	68.8698	53.819	74.13	96.5742	116.935	91.9575	120.329	135.828	133.461
BJN34_0265	hypothetical protein	-1.59238	1.24638	4.5977	0.0320148	0.0813769	-1.17754	1.24638	2.72757	0.0986294	0.297435	-0.414846	1.24638	0.27964	0.596937	0.802639	1.41765	40.2759	3.13784	34.1873	0.301364	42.7808	3.50655	13.3599	14.1552
BJN34_02650	threonine ammonia-lyase, biosynthetic	-1.72118	7.38912	19.2279	1.16e-05	9.74e-05	-0.788827	7.38912	4.2425	0.0394242	0.162198	-0.932356	7.38912	5.83758	0.0156873	0.0965692	34.5223	34.1419	64.3314	79.3135	112.799	73.6559	139.933	99.7252	125.995
BJN34_02655	trehalose-phosphatase	0.44315	4.8918	2.06835	0.150384	0.272796	0.488251	4.8918	2.52081	0.112353	0.323646	-0.0451009	4.8918	0.022512	0.880733	0.953141	36.9854	6.05178	26.9037	5.6857	32.3787	8.82847	14.6249	31.5686	16.1542
BJN34_02660	glucoamylase	0.743553	6.02529	4.98652	0.0255455	0.0674588	0.641419	6.02529	3.71547	0.0539106	0.198975	0.102134	6.02529	0.0971149	0.75532	0.890434	39.8635	40.4187	27.9955	35.5304	32.8348	33.8778	11.9886	29.0121	11.7233
BJN34_02665	alpha,alpha-trehalose-phosphate synthase (UDP-forming)	1.07274	5.57044	18.7024	1.53e-05	0.000122585	0.880678	5.57044	12.5707	0.000391835	0.00506169	0.192064	5.57044	0.656446	0.417817	0.681458	35.6199	48.2484	29.3733	33.686	34.5572	31.9403	11.7185	16.8687	15.081
BJN34_02670	pterin-4-alpha-carbinolamine dehydratase	2.97659	2.56792	14.7029	0.000125851	0.000757401	2.8268	2.56792	13.2421	0.000273725	0.00382112	0.149788	2.56792	0.0542143	0.815886	0.923977	29.1827	22.1422	8.60132	23.3922	22.1646	7.20003	0	1.25063	3.86792
BJN34_02675	IS110 family transposase	-0.0457008	7.30307	0.0264747	0.870746	0.921576	-0.123257	7.30307	0.192461	0.660876	0.848842	0.0775567	7.30307	0.0764194	0.78221	0.905689	155.821	163.168	92.5912	118.428	121.725	152.555	84.8253	160.222	99.0179
BJN34_02680	molybdopterin-guanine dinucleotide biosynthesis protein MobA	1.02689	4.99241	9.44741	0.00211447	0.00851692	0.690747	4.99241	4.25882	0.039047	0.161664	0.336144	4.99241	1.08049	0.298587	0.575804	83.9484	60.559	36.6982	49.2049	43.2789	50.6164	16.251	35.1443	19.3176
BJN34_02685	hypothetical protein	0.711366	6.37034	9.73855	0.00180443	0.00742357	0.108636	6.37034	0.224803	0.635405	0.833089	0.602729	6.37034	7.13311	0.00756733	0.0592717	105.025	87.425	82.3482	57.7719	59.2606	67.2838	38.3736	41.7767	56.6199
BJN34_02690	carbon monoxide dehydrogenase	0.524388	5.70968	2.98581	0.0839973	0.17492	0.542727	5.70968	3.20256	0.0735229	0.245336	-0.0183384	5.70968	0.00378099	0.950969	0.982616	127.45	88.6687	59.7106	96.765	84.2337	99.3571	56.0814	36.0108	59.3154
BJN34_02695	VWA domain-containing protein	2.10638	3.42481	15.5654	7.97e-05	0.00051525	1.03467	3.42481	3.68357	0.0549512	0.20142	1.07171	3.42481	4.66112	0.0308531	0.151294	17.3074	13.1839	6.72297	3.17184	9.56104	4.33474	2.05001	1.61123	3.03639
BJN34_0270	hypothetical protein	N/A	N/A	N/A	N/A	N/A	N/A	N/A	N/A	N/A	N/A	N/A	N/A	N/A	N/A	N/A	2.35776	3.08098	7.91172	0.922894	2.13024	1.12412	0.973102	1.51182	1.04689
BJN34_02700	ATPase	2.38431	3.64184	19.6565	9.27e-06	8e-05	1.61551	3.64184	9.00834	0.00268751	0.0230586	0.768791	3.64184	2.48953	0.114606	0.335389	22.3109	29.3901	0.412141	11.1174	14.1837	8.96198	1.30858	4.80472	2.67832
BJN34_02705	xanthine dehydrogenase family protein subunit M	1.76461	4.48014	14.1377	0.000169905	0.000982807	0.970859	4.48014	4.31368	0.0378071	0.158556	0.793755	4.48014	3.13588	0.076587	0.265995	46.5459	47.3409	21.9397	24.2309	17.8102	24.6697	3.96763	17.3053	6.09096
BJN34_02710	xanthine dehydrogenase family protein molybdopterin-binding subunit	1.64853	6.23702	8.87643	0.00288877	0.0110324	0.715072	6.23702	1.72758	0.18872	0.445543	0.93346	6.23702	2.96722	0.0849675	0.282937	58.3689	60.9173	19.3734	22.4448	22.4138	26.9172	3.11688	21.4734	11.4143
BJN34_02715	(2Fe-2S)-binding protein	0.408135	5.25802	1.72872	0.188575	0.321441	-0.122676	5.25802	0.153704	0.69502	0.86559	0.53081	5.25802	2.94543	0.0861206	0.28531	88.0335	98.1045	59.3483	62.3595	39.4391	71.2081	31.672	70.2999	48.8927
BJN34_02720	DedA family protein	-0.362287	5.18101	1.86162	0.172438	0.301887	0.0899313	5.18101	0.118355	0.730825	0.884966	-0.452218	5.18101	2.97028	0.084807	0.282937	47.8735	44.212	40.3684	63.2514	53.4287	68.979	55.0302	37.353	44.3189
BJN34_02725	FAD-linked oxidase	-0.675239	10.0428	9.92532	0.00163021	0.00682852	-0.524855	10.0428	6.02152	0.0141324	0.0792332	-0.150384	10.0428	0.496135	0.481203	0.721649	200.078	200.786	164.243	202.99	217.019	217.406	228.392	260.507	243.457
BJN34_02730	HIT family protein	-0.312731	6.36862	1.48659	0.222746	0.364436	-0.380842	6.36862	2.20178	0.137851	0.366346	0.068111	6.36862	0.0704843	0.790633	0.91104	175.876	177.875	113.262	146.776	132.172	172.1	106.024	201.945	165.591
BJN34_02735	ABC transporter ATP-binding protein	0.243558	6.63718	0.97035	0.324593	0.476565	0.305312	6.63718	1.52755	0.21648	0.48093	-0.0617541	6.63718	0.0634779	0.801081	0.915141	54.3493	57.5706	34.2735	41.6036	51.4155	60.8187	31.0036	32.7546	35.3698
BJN34_02740	DUF971 domain-containing protein	-0.732323	6.70797	9.56268	0.00198573	0.00805459	-0.318405	6.70797	1.84338	0.174556	0.423986	-0.413919	6.70797	3.07272	0.079616	0.2719	169.582	177.897	139.009	206.353	224.235	227.907	220.703	178.653	253.888
BJN34_02745	bifunctional demethylmenaquinone methyltransferase/2-methoxy-6-polyprenyl-1,4-benzoquinol methylase	-0.32712	7.54137	2.04031	0.153178	0.276415	-0.00866936	7.54137	0.00144371	0.969691	0.987057	-0.31845	7.54137	1.94278	0.163367	0.412529	195.033	208.734	168.05	212.481	266.248	245.136	179.829	177.162	225.633
BJN34_0275	hypothetical protein	N/A	N/A	N/A	N/A	N/A	N/A	N/A	N/A	N/A	N/A	N/A	N/A	N/A	N/A	N/A	681.537	657.474	436.416	667.366	1.23838	1.72731	0.370785	276.008	326.113
BJN34_02750	Tim44 domain-containing protein	0.835725	9.32639	7.39538	0.00653916	0.0217261	1.24879	9.32639	16.2642	5.51e-05	0.000985732	-0.413067	9.32639	1.83334	0.175734	0.43116	0.651487	0	0	0.579569	1075.47	612.026	204.965	0	0.246845
BJN34_02755	SCP2 domain-containing protein	-0.867668	5.41691	10.5507	0.00116141	0.00515819	-0.241127	5.41691	0.852839	0.35575	0.630199	-0.62654	5.41691	5.5433	0.0185515	0.106598	42.3366	29.1252	39.23	68.9371	55.85	51.6307	52.8252	50.5976	62.4705
BJN34_02760	ubiquinone biosynthesis regulatory protein kinase UbiB	-0.780803	6.41098	10.0342	0.00153663	0.00651138	-0.285953	6.41098	1.38054	0.24001	0.511588	-0.49485	6.41098	4.0558	0.04402	0.188028	32.5257	31.2615	37.0143	48.3793	52.281	45.8186	45.7354	43.6755	53.0822
BJN34_02765	SAM-dependent methyltransferase	-0.174762	5.76402	0.609929	0.434815	0.583347	-0.0937861	5.76402	0.177042	0.673928	0.854937	-0.0809757	5.76402	0.132638	0.715713	0.870077	77.8454	63.2791	72.2913	82.9455	70.9256	78.2655	57.1126	74.373	66.606
BJN34_02770	IS110 family transposase	-0.019551	5.74512	0.00469977	0.945344	0.968607	-0.116917	5.74512	0.167748	0.682121	0.857793	0.0973656	5.74512	0.11736	0.731915	0.878451	53.306	55.3218	31.3302	40.0045	40.108	51.7004	27.5749	53.5378	33.613
BJN34_02775	sodium:solute symporter	-1.53094	6.0682	24.9663	5.83e-07	6.87e-06	-0.631317	6.0682	4.50041	0.0338868	0.147197	-0.899622	6.0682	8.75802	0.00308244	0.030665	18.7574	25.0455	19.1747	46.6968	39.5915	34.1375	56.4323	34.2291	56.729
BJN34_02780	FmdB family transcriptional regulator	-2.09188	5.19763	29.1484	6.7e-08	9.65e-07	-0.828704	5.19763	5.07423	0.0242841	0.116756	-1.26317	5.19763	10.8763	0.000974048	0.0130957	36.3251	32.6507	38.34	94.6949	91.5062	81.902	179.771	74.7852	116.588
BJN34_02785	DUF502 domain-containing protein	-2.25248	7.01598	30.3994	3.52e-08	5.42e-07	-0.948591	7.01598	5.8647	0.0154475	0.0841531	-1.30388	7.01598	10.7138	0.00106338	0.0139448	47.3057	48.8086	72.1535	171.994	156.499	104.495	290.951	140.847	225.085
BJN34_02790	aspartate--tRNA ligase	-2.15751	9.1175	39.4799	3.31e-10	7.97e-09	-1.04158	9.1175	9.83317	0.00171393	0.0163912	-1.11593	9.1175	11.187	0.000823718	0.0115688	103.618	80.0803	126.875	227.781	294.052	171.885	394.256	330.191	419.576
BJN34_02795	hypothetical protein	0.80901	5.56689	6.08607	0.0136252	0.0403165	0.512273	5.56689	2.43835	0.118401	0.335437	0.296738	5.56689	0.850563	0.356393	0.63015	76.0212	61.3832	35.0862	35.9255	52.7056	51.289	21.8154	20.3574	36.352
BJN34_0280	hypothetical protein	N/A	N/A	N/A	N/A	N/A	N/A	N/A	N/A	N/A	N/A	N/A	N/A	N/A	N/A	N/A	3.08234	120.608	1.58401	0.712211	1.07706	0.795111	0.160022	2.96966	2.86151
BJN34_02800	dihydroneopterin triphosphate diphosphatase	-0.231422	6.70474	0.978238	0.322634	0.4751	-0.0449203	6.70474	0.0371157	0.84723	0.939698	-0.186502	6.70474	0.640027	0.423701	0.683544	168.922	189.94	152.869	168.576	190.215	235.193	136.569	198.542	155.145
BJN34_02805	endonuclease	0.430494	6.53591	2.36978	0.123704	0.235245	0.475336	6.53591	2.89197	0.0890219	0.277527	-0.0448416	6.53591	0.0262581	0.871272	0.950029	133.874	5.93103	83.1945	98.6408	120.823	131.915	63.1229	89.1356	49.2502
BJN34_02810	molybdopterin-guanine dinucleotide biosynthesis protein B	0.500688	6.03702	3.65113	0.0560312	0.127744	0.034483	6.03702	0.0171646	0.895765	0.960508	0.466205	6.03702	3.21257	0.0730748	0.259472	147.7	152.163	100.77	85.1877	91.7098	116.774	86.4387	62.0489	77.3533
BJN34_02815	cardiolipin synthase B	0.0743039	5.29444	0.108459	0.741906	0.837846	-0.045302	5.29444	0.0401233	0.84124	0.936167	0.119606	5.29444	0.287343	0.591928	0.799233	31.597	25.1035	24.0635	25.9376	24.4623	25.1262	19.7845	19.1049	23.2657
BJN34_02820	TetR family transcriptional regulator	-0.889045	7.53119	6.51015	0.010726	0.0329052	-0.276507	7.53119	0.641259	0.423255	0.687454	-0.612539	7.53119	3.11478	0.0775851	0.26818	201.705	170.576	186.391	186.688	342.435	342.802	203.795	224.569	426.673
BJN34_02825	acyl-CoA dehydrogenase	0.629505	9.21517	1.36657	0.242402	0.387978	1.2424	9.21517	5.21023	0.0224544	0.110579	-0.612891	9.21517	1.29779	0.254618	0.530866	380.195	217.094	231.798	138.899	546.75	591.285	64.9371	162.914	216.47
BJN34_02830	3-hydroxyacyl-CoA dehydrogenase	1.38412	8.81797	6.08904	0.0136023	0.0402661	1.33857	8.81797	5.70775	0.0168902	0.0898214	0.045556	8.81797	0.0068563	0.934008	0.975279	342.394	148.527	143.126	87.885	286.347	234.241	25.2168	68.9808	105.36
BJN34_02835	acetyl-CoA acetyltransferase	1.68539	7.84552	7.65407	0.00566445	0.0192447	1.14818	7.84552	3.64871	0.0561128	0.204164	0.537212	7.84552	0.818086	0.36574	0.636411	459.639	163.002	151.194	81.6944	229.219	215.251	21.7128	67.5433	107.59
BJN34_02840	hypothetical protein	2.18587	5.38392	12.3236	0.000447263	0.00230764	1.71144	5.38392	7.74726	0.00537942	0.0395824	0.474421	5.38392	0.645245	0.421818	0.683322	102.706	36.2037	38.5354	20.594	50.6801	55.7648	3.48145	8.05793	19.9917
BJN34_02845	enoyl-CoA hydratase	2.03477	5.83132	11.6771	0.00063273	0.00310051	1.32544	5.83132	5.13058	0.0235079	0.114545	0.709326	5.83132	1.53846	0.214848	0.486942	208.72	69.695	40.4991	29.6369	81.1064	79.065	10.8382	25.5115	25.2975
BJN34_0285	hypothetical protein	0.276246	1.075	0.175702	0.675093	0.7891	0.222642	1.075	0.114213	0.735398	0.886112	0.0536039	1.075	0.00750982	0.930942	0.973693	3.75897	11.5302	6.19597	5.52543	4.70144	4.50884	2.07384	3.05027	4.04197
BJN34_02850	IS110 family transposase	0.663413	4.31892	5.2684	0.0217159	0.0592439	0.295713	4.31892	1.02094	0.312297	0.587914	0.367701	4.31892	1.73116	0.188263	0.450115	22.187	22.428	11.9023	15.3465	13.32	15.1444	7.16807	11.6831	9.57679
BJN34_02855	hypothetical protein	0.256909	1.73184	0.265721	0.606217	0.736025	-0.853858	1.73184	2.3899	0.122121	0.340269	1.11077	1.73184	4.45477	0.0348038	0.164268	9.8494	6.66767	7.77069	8.38758	1.7772	4.86763	4.59697	9.78005	7.21679
BJN34_02860	group II intron reverse transcriptase/maturase	0.993557	7.68908	16.5475	4.74e-05	0.000328192	0.0329993	7.68908	0.018387	0.892139	0.958979	0.960558	7.68908	15.5695	7.95e-05	0.00164864	203.031	170.974	169.072	110.929	71.8062	103.968	58.7294	92.031	72.9009
BJN34_02865	IS630 family transposase	-0.600459	1.60271	1.18321	0.276703	0.426038	0.0263469	1.60271	0.00259777	0.959351	0.983935	-0.626806	1.60271	1.3783	0.240391	0.516274	1.24744	1.58389	0.966582	2.05016	1.78763	2.78333	0.80044	2.88451	1.43129
BJN34_02870	IS110 family transposase	0.0790858	4.31282	0.0756789	0.783241	0.865214	0.45551	4.31282	2.60395	0.106598	0.31381	-0.376425	4.31282	1.85001	0.173783	0.428615	15.4977	16.6496	11.152	17.9459	14.6091	24.9426	10.9313	11.4088	10.7492
BJN34_02875	group II intron reverse transcriptase/maturase	1.52788	6.90852	3.19664	0.0737897	0.157984	1.57221	6.90852	3.37698	0.066113	0.22854	-0.0443335	6.90852	0.00282295	0.957627	0.985209	84.7833	86.2933	90.2994	100.95	82.7754	94.3571	3.49029	69.0944	4.97657
BJN34_02880	acyl-CoA thioesterase	-0.988413	4.75895	14.4426	0.000144496	0.000857318	-0.151381	4.75895	0.370578	0.542689	0.775813	-0.837032	4.75895	10.5118	0.00118613	0.0151807	42.6518	34.0934	31.2128	72.8769	57.632	66.6613	62.1067	50.5873	59.5901
BJN34_02885	metal ABC transporter permease	0.480195	6.06346	4.84989	0.0276479	0.0722119	0.086011	6.06346	0.153759	0.694968	0.86559	0.394184	6.06346	3.34311	0.0674867	0.246585	39.7126	36.8079	34.2144	32.4228	26.5638	27.153	17.834	21.891	25.1461
BJN34_02890	LysR family transcriptional regulator	0.14754	6.22861	0.40454	0.524754	0.667291	0.103395	6.22861	0.198776	0.655711	0.846755	0.0441448	6.22861	0.0368391	0.847793	0.939395	83.3959	66.4826	56.6986	68.5131	53.8686	81.5436	45.2479	57.1559	48.1938
BJN34_02895	glutamate dehydrogenase	0.294324	10.0124	0.389496	0.532564	0.672529	0.513881	10.0124	1.18336	0.276673	0.553071	-0.219558	10.0124	0.217032	0.641311	0.830299	956.539	769.433	409.965	1027.21	637.869	828.741	244.434	266.529	902.554
BJN34_0290	hypothetical protein	0.85244	1.30279	1.29941	0.254322	0.401396	0.466771	1.30279	0.374972	0.540307	0.775675	0.385668	1.30279	0.301848	0.582726	0.794408	219.232	15.8368	199.741	1.64879	272.545	15.1472	0.519916	152.433	4.13088
BJN34_02900	amino acid ABC transporter substrate-binding protein	0.886364	11.6274	13.692	0.000215364	0.00122028	0.864337	11.6274	13.0299	0.000306549	0.00416186	0.022027	11.6274	0.00859655	0.926128	0.971887	3549.39	3726.9	3631.1	4280.3	3132.28	3648.35	1281.9	1710.2	1872.61
BJN34_02905	amino acid ABC transporter permease	-0.117623	7.63515	0.228134	0.632911	0.758123	0.320821	7.63515	1.7042	0.19174	0.448572	-0.438444	7.63515	3.18473	0.0743293	0.2618	6.2084	201.566	8.03146	339.244	6.02219	249.458	179.049	6.81532	216.743
BJN34_02910	amino acid ABC transporter permease	-0.041609	7.30208	0.0339753	0.853759	0.912605	0.4941	7.30208	4.82057	0.028122	0.128866	-0.535709	7.30208	5.68954	0.0170663	0.101329	178.954	157.763	179.938	274.908	254.735	239.549	125.088	154.285	157.7
BJN34_02915	amino acid ABC transporter ATP-binding protein	0.198327	8.63301	0.715146	0.397741	0.551232	0.483984	8.63301	4.25231	0.0391969	0.161836	-0.285658	8.63301	1.49085	0.222085	0.495557	418.731	463.593	479.982	590.895	563.793	555.17	260.101	387.256	335.269
BJN34_02920	class II glutamine amidotransferase	-0.414567	7.29932	2.74147	0.0977747	0.196743	-0.306766	7.29932	1.50715	0.219574	0.48488	-0.107802	7.29932	0.185909	0.666344	0.843744	133.345	145.117	153.231	163.082	141.273	176.626	124.651	207.293	145.253
BJN34_02925	tartrate dehydrogenase	0.00160253	6.68448	5.88e-05	0.99388	0.996038	-0.272901	6.68448	1.69261	0.193257	0.449973	0.274503	6.68448	1.72759	0.188719	0.450427	98.3023	90.3428	77.2737	77.4705	68.9768	77.5552	58.704	74.6469	83.7125
BJN34_02930	glycerate kinase	-0.128772	4.27796	0.126393	0.722202	0.823403	0.144115	4.27796	0.161453	0.687822	0.86152	-0.272888	4.27796	0.583968	0.444761	0.697673	42.047	44.7209	64.0535	58.9987	70.5681	59.988	53.5287	31.955	51.2306
BJN34_02935	dihydroorotase	-0.176391	6.86933	0.561787	0.453541	0.599972	-0.0135813	6.86933	0.00334846	0.953855	0.981446	-0.162809	6.86933	0.482129	0.487459	0.725711	95.1229	89.0606	87.4168	103.071	104.149	103.341	83.1874	68.7848	97.6489
BJN34_02940	DUF3025 domain-containing protein	-0.133468	3.97673	0.20089	0.654004	0.773769	0.363119	3.97673	1.57898	0.208907	0.470092	-0.496587	3.97673	3.00435	0.0830415	0.279523	13.2752	13.7935	13.4195	16.1506	17.4277	25.1002	10.2946	12.3534	13.5477
BJN34_0295	hypothetical protein	N/A	N/A	N/A	N/A	N/A	N/A	N/A	N/A	N/A	N/A	N/A	N/A	N/A	N/A	N/A	9.29772	0.406307	2.17851	5.5061	1.60417	4.27489	2.126	14.8017	4.11186
BJN34_02950	diacylglycerol kinase	0.566944	5.24542	0.34952	0.554385	0.692525	-0.508006	5.24542	0.280023	0.596686	0.808958	1.07495	5.24542	1.23633	0.26618	0.543026	0	3.45674	76.312	28.2995	12.901	6.5229	25.0482	0.034948	12.8724
BJN34_02955	porin	-0.818116	6.32619	1.08101	0.298472	0.449485	-0.822284	6.32619	1.09236	0.29595	0.570958	0.00416783	6.32619	2.84e-05	0.99575	0.999406	14.3657	10.8792	83.2255	62.2908	40.182	17.3049	76.7782	44.7444	44.2789
BJN34_02960	FMN-binding protein	-0.540167	4.7174	0.688659	0.406621	0.559619	-1.00513	4.7174	2.34292	0.125853	0.346347	0.464966	4.7174	0.506368	0.476715	0.718964	15.0889	16.0403	74.6935	39.4625	29.6968	14.0723	44.7317	40.0634	50.1789
BJN34_02965	hypothetical protein	-0.572486	4.70071	0.926637	0.335738	0.48827	-0.567226	4.70071	0.911556	0.339702	0.614953	-0.00526027	4.70071	7.85e-05	0.992929	0.998834	11.8758	8.79149	42.218	25.6086	28.9503	13.5581	28.2713	26.4476	26.649
BJN34_02970	hypothetical protein	0.0514191	5.0989	0.0435532	0.834687	0.900635	0.182836	5.0989	0.557539	0.455254	0.715916	-0.131417	5.0989	0.295581	0.586666	0.796225	64.1782	69.2344	54.6648	79.2197	53.7917	78.4552	42.0635	46.2144	60.1511
BJN34_02975	peroxiredoxin	-0.0314081	6.13715	0.0138806	0.906214	0.94412	0.0452624	6.13715	0.0289434	0.86491	0.947782	-0.0766705	6.13715	0.0836466	0.772415	0.900371	139.743	113.94	161.887	175.806	146.025	132.321	111.871	113.065	125.135
BJN34_02980	50S ribosomal protein L13	-2.7512	11.3029	38.9609	4.32e-10	1.01e-08	-1.44827	11.3029	11.8273	0.000583683	0.00695598	-1.30293	11.3029	9.63166	0.00191252	0.0219243	1149.94	1023.64	2211.43	3764.19	4448.52	3183.85	10538.6	6453.32	7513.78
BJN34_02985	30S ribosomal protein S9	-2.75771	10.8046	43.6197	3.99e-11	1.1e-09	-1.54053	10.8046	14.8486	0.000116494	0.00186283	-1.21718	10.8046	9.40466	0.00216435	0.0240261	966.659	806.6	1666.93	3009.09	3097.48	2300.49	8203.4	5378.16	5669.38
BJN34_02990	hypothetical protein	-1.17457	5.36881	15.4717	8.37e-05	0.000538414	-0.224075	5.36881	0.600899	0.438235	0.700771	-0.950497	5.36881	10.2283	0.00138305	0.0169791	40.6668	44.0429	40.1454	91.2218	81.5856	76.3336	95.354	55.0726	78.228
BJN34_02995	group II intron reverse transcriptase/maturase	-1.50114	9.83505	12.1743	0.000484531	0.00246321	-1.10989	9.83505	6.78563	0.00918947	0.058214	-0.391253	9.83505	0.859893	0.353769	0.626866	180.573	211.747	399.863	358.159	430.29	306.43	776.751	426.797	662.705
BJN34_0300	hypothetical protein	N/A	N/A	N/A	N/A	N/A	N/A	N/A	N/A	N/A	N/A	N/A	N/A	N/A	N/A	N/A	1657.18	1.55957	0.744554	3.95564	1.86144	0.774577	0.605724	1.34191	1.53192
BJN34_03000	iron-sulfur cluster insertion protein ErpA	-0.558168	9.65213	5.97585	0.0145031	0.0424966	-0.559224	9.65213	5.99978	0.0143077	0.0796354	0.0010554	9.65213	2.15e-05	0.996302	0.999406	0	1554.22	1704.57	1637.54	1609.75	1809.85	1899.56	2155.08	1875.71
BJN34_03005	group II intron reverse transcriptase/maturase	-0.879666	5.34716	10.7335	0.00105216	0.00474942	-0.894972	5.34716	11.1388	0.000845419	0.00942622	0.0153064	5.34716	0.00318557	0.954991	0.983835	16.6875	19.9177	22.555	20.2774	20.1693	19.9825	32.5934	26.9996	29.8319
BJN34_03010	phytanoyl-CoA dioxygenase	0.469912	3.51457	2.35928	0.124539	0.236509	-0.280301	3.51457	0.763915	0.382106	0.65326	0.750212	3.51457	6.05769	0.0138459	0.0890085	16.8478	13.8398	14.7668	8.38552	7.59931	11.4331	7.28085	11.1426	8.32226
BJN34_03015	LysR family transcriptional regulator	0.0980745	3.38671	0.0747416	0.784554	0.866249	-0.225597	3.38671	0.383784	0.535585	0.772421	0.323672	3.38671	0.823399	0.364188	0.635449	12.8947	8.68923	9.1864	10.3743	7.88064	6.70847	6.9587	10.8277	5.71219
BJN34_03020	anhydro-N-acetylmuramic acid kinase	-0.561122	5.74696	4.34108	0.0372034	0.0918347	-0.18732	5.74696	0.494188	0.482065	0.735894	-0.373802	5.74696	1.94009	0.163659	0.412964	35.9118	25.7221	35.0411	37.4592	50.2278	40.9087	34.5522	44.8525	38.3573
BJN34_03025	peptidase	-1.04767	7.12673	10.4454	0.00122953	0.00539838	-0.471978	7.12673	2.16958	0.140764	0.371121	-0.575692	7.12673	3.19252	0.0739759	0.261331	46.7827	49.7023	72.1649	97.643	94.6166	69.3703	103.108	78.276	107.308
BJN34_03030	tyrosine--tRNA ligase	-0.704102	8.12903	9.24205	0.0023652	0.00931022	-0.425614	8.12903	3.4087	0.0648535	0.226333	-0.278488	8.12903	1.45532	0.227677	0.502689	135.999	157.883	162.448	200.736	190.55	178.792	188.385	203.225	220.069
BJN34_03035	D-tyrosyl-tRNA(Tyr) deacylase	-0.210389	6.60099	0.865492	0.352206	0.504074	0.0969225	6.60099	0.185761	0.666469	0.851137	-0.307311	6.60099	1.86869	0.171625	0.425468	159.243	158.771	163.315	218.741	186.274	208.384	159.207	149.899	144.692
BJN34_03040	YbhB/YbcL family Raf kinase inhibitor-like protein	-0.189988	8.48952	0.742577	0.388837	0.542913	-0.157062	8.48952	0.507988	0.476011	0.731285	-0.0329258	8.48952	0.0223476	0.881166	0.953189	489.264	446.975	439.866	506.771	460.174	473.821	359.285	521.7	406.653
BJN34_03045	histidine phosphatase family protein	-0.521931	6.6763	5.81701	0.0158719	0.045643	-0.0857723	6.6763	0.160195	0.688977	0.862031	-0.436158	6.6763	4.09513	0.043007	0.185378	110.238	109.383	93.7507	161.06	143.278	127.437	114.292	124.771	126.794
BJN34_0305	hypothetical protein	N/A	N/A	N/A	N/A	N/A	N/A	N/A	N/A	N/A	N/A	N/A	N/A	N/A	N/A	N/A	0.216019	2.73993	1.44202	2.83522	22.6258	2.97812	0.667078	10.9076	1.42421
BJN34_03050	hypothetical protein	0.0191931	4.07217	0.00403894	0.949326	0.970921	0.199655	4.07217	0.446374	0.504062	0.751534	-0.180462	4.07217	0.377065	0.539178	0.764237	18.893	20.5427	16.6945	21.9581	0.087887	19.9759	16.3301	0.04948	17.1082
BJN34_03055	hypothetical protein	0.668831	7.44269	3.8315	0.0502978	0.117088	0.165739	7.44269	0.236422	0.626802	0.827434	0.503092	7.44269	2.18452	0.139405	0.376899	419.296	397.131	204.935	253.218	188.063	283.19	98.3067	260.639	163.017
BJN34_03060	hypothetical protein	0.0915653	6.56665	0.130362	0.718057	0.820569	-0.117984	6.56665	0.215608	0.642407	0.83855	0.20955	6.56665	0.68587	0.407573	0.670954	185.356	159.674	104.696	124.33	119.579	147.906	87.5898	147.83	106.146
BJN34_03065	Holliday junction DNA helicase RuvB	-0.40686	7.13115	2.65219	0.103407	0.205048	-0.235961	7.13115	0.897308	0.343505	0.617292	-0.170899	7.13115	0.469766	0.493095	0.728638	97.7944	100.349	99.3781	113.608	115.828	113.477	110.535	83.8264	126.642
BJN34_03070	Holliday junction DNA helicase RuvA	-0.210397	4.2868	0.537421	0.463504	0.610481	0.180732	4.2868	0.412951	0.520475	0.763057	-0.391129	4.2868	1.94707	0.162903	0.411808	24.6942	32.7063	16.6612	38.483	28.585	31.5189	19.2526	24.723	25.1669
BJN34_03075	glycerophosphodiester phosphodiesterase	-0.204164	5.71818	0.821336	0.36479	0.517795	-0.203777	5.71818	0.820957	0.364901	0.63713	-0.000386566	5.71818	2.98e-06	0.998623	0.999848	34.226	35.5537	34.3843	37.5471	30.7236	39.0018	32.7094	30.0654	35.1529
BJN34_03080	crossover junction endodeoxyribonuclease RuvC	-0.141157	5.77189	0.40398	0.525041	0.667523	-0.0537515	5.77189	0.0590385	0.808022	0.919899	-0.0874051	5.77189	0.157224	0.691726	0.857276	97.0419	79.1201	70.9607	92.825	78.9375	96.0017	57.9729	87.4637	77.0772
BJN34_03085	bifunctional phosphoribosylaminoimidazolecarboxamide formyltransferase/IMP cyclohydrolase	-2.28527	8.13533	51.5564	6.96e-13	2.5e-11	-1.43793	8.13533	21.6686	3.24e-06	8.4e-05	-0.84734	8.13533	7.59774	0.00584416	0.0493287	53.7086	53.3877	72.1306	102.451	143.066	86.8107	227.699	233.888	263.831
BJN34_03090	Fis family transcriptional regulator	-1.73104	4.60321	21.1785	4.18e-06	3.98e-05	-1.15617	4.60321	10.0173	0.00155079	0.0150598	-0.574869	4.60321	2.32373	0.127414	0.360089	33.7855	36.6543	62.8145	78.005	70.467	60.7954	138.603	94.9518	135.955
BJN34_03095	tRNA dihydrouridine synthase DusB	-2.03798	6.73219	22.7666	1.83e-06	1.91e-05	-0.925401	6.73219	5.02842	0.0249347	0.118625	-1.11258	6.73219	7.08977	0.0077525	0.0599712	27.1029	34.4149	43.8313	84.6004	96.189	55.3422	162.651	72.0236	118.046
BJN34_0310	hypothetical protein	-0.114128	5.8181	0.18236	0.669353	0.785392	0.0991982	5.8181	0.138994	0.709283	0.874609	-0.213326	5.8181	0.646807	0.421257	0.682927	91.5919	91.1178	99.761	91.0869	99.5824	76.2041	58.3658	76.8239	65.3195
BJN34_03100	2-polyprenyl-6-methoxyphenol 4-hydroxylase	0.0161422	6.67888	0.00316093	0.955165	0.974589	0.130679	6.67888	0.207704	0.648573	0.842536	-0.114537	6.67888	0.160367	0.688819	0.85657	74.3704	69.0041	66.7356	82.1087	64.3693	87.4114	32.675	79.2268	60.8138
BJN34_03105	hypothetical protein	-0.133636	6.10688	0.252992	0.614976	0.743253	0.0817984	6.10688	0.0955485	0.757238	0.896413	-0.215434	6.10688	0.665063	0.414778	0.67782	127.876	117.148	48.3855	156.809	117.558	134.513	63.1867	134.562	114.528
BJN34_03110	Xaa-Pro aminopeptidase	-0.2497	7.93974	1.29355	0.255395	0.402551	-0.204304	7.93974	0.867383	0.351681	0.626457	-0.0453965	7.93974	0.0428634	0.835983	0.933303	139.978	154.057	132.173	128.428	155.386	164.887	117.189	146.597	150.732
BJN34_03115	mannose-1-phosphate guanylyltransferase	-0.0232056	5.8763	0.00923315	0.92345	0.956376	0.163773	5.8763	0.464204	0.495666	0.74605	-0.186978	5.8763	0.612501	0.433848	0.690566	69.0321	75.858	50.6703	92.8253	62.6958	70.5728	54.0949	54.7944	50.5777
BJN34_03120	branched-chain amino acid transporter	2.58153	2.71789	3.47886	0.0621576	0.138475	2.04492	2.71789	2.25104	0.133525	0.358418	0.536615	2.71789	0.173809	0.676749	0.849478	77.2673	2.26276	2.18524	3.15874	44.7755	2.68295	2.64497	2.55302	3.55763
BJN34_03125	branched-chain amino acid ABC transporter permease	-0.105558	5.11914	0.123188	0.725602	0.826282	0.134362	5.11914	0.202389	0.6528	0.845489	-0.23992	5.11914	0.650472	0.419944	0.68233	30.801	30.9443	39.8766	47.3338	41.3923	35.5855	31.1951	23.3149	35.4942
BJN34_03130	aminoglycoside phosphotransferase	-0.446232	6.17626	2.50899	0.113198	0.219118	-0.337781	6.17626	1.44623	0.229135	0.496129	-0.108451	6.17626	0.148621	0.699857	0.862104	43.9438	58.3533	54.6558	44.2259	58.208	71.7526	60.9729	50.002	63.622
BJN34_03135	LPS biosynthesis protein	-0.893997	8.74802	12.9271	0.000323866	0.00174575	-0.294353	8.74802	1.42609	0.232404	0.501141	-0.599644	8.74802	5.86434	0.0154507	0.0957749	97.833	99.6813	115.221	170.75	158.365	160.402	167.977	144.095	163.578
BJN34_03140	molecular chaperone SurA	-0.984324	8.12973	18.301	1.89e-05	0.000146405	-0.445432	8.12973	3.82585	0.0504678	0.191055	-0.538892	8.12973	5.54501	0.0185334	0.106582	113.468	106.624	114.873	151.027	177.813	169.968	155.612	181.331	208.136
BJN34_03145	4-hydroxythreonine-4-phosphate dehydrogenase PdxA	-0.527278	7.07344	6.48501	0.0108788	0.0333031	-0.37792	7.07344	3.35692	0.066923	0.229934	-0.149358	7.07344	0.521651	0.470138	0.715961	92.6613	94.6526	80.637	111.869	90.9001	100.956	92.6865	107.638	114.771
BJN34_0315	DUF2474 domain-containing protein	-0.24249	2.64603	0.24975	0.617251	0.745092	0.200052	2.64603	0.17925	0.672018	0.854125	-0.442541	2.64603	0.878487	0.348617	0.623519	30.4866	26.0879	25.7265	27.2553	36.5407	148.912	12.7893	47.8076	20.5072
BJN34_03150	16S rRNA (adenine(1518)-N(6)/adenine(1519)-N(6))- dimethyltransferase	-0.715621	6.52459	9.44117	0.00212167	0.0085348	-0.386426	6.52459	2.80263	0.0941099	0.28877	-0.329195	6.52459	2.0064	0.156637	0.403338	67.4971	82.8393	70.398	89.9027	89.3813	104.943	98.8649	86.4351	109.875
BJN34_03155	tryptophan--tRNA ligase	-0.866483	7.75385	11.6019	0.000658859	0.0031993	-0.717773	7.75385	8.01592	0.0046368	0.0353971	-0.148709	7.75385	0.344795	0.557074	0.778285	131.891	117.398	160.744	154.699	166.281	53.1823	187.958	208.905	222.47
BJN34_03160	multidrug DMT transporter permease	-0.108998	5.00063	0.10948	0.740737	0.836962	0.0247508	5.00063	0.00569388	0.93985	0.977253	-0.133749	5.00063	0.167456	0.682382	0.853194	26.8958	23.8986	33.4953	27.6807	39.2474	28.1898	29.0044	20.1956	24.8171
BJN34_03165	lactoylglutathione lyase	-0.152082	6.07576	0.37366	0.541016	0.680472	-0.337823	6.07576	1.83298	0.175776	0.425849	0.185741	6.07576	0.55712	0.455423	0.705921	146.452	140.665	142.302	121.017	142.3	122.207	143.142	112.32	131.331
BJN34_03170	metal-dependent hydrolase	-0.583881	5.05579	3.63445	0.0565952	0.128541	-0.633325	5.05579	4.27612	0.0386515	0.160445	0.0494442	5.05579	0.0257942	0.872404	0.950336	24.3378	27.2683	32.8602	30.4356	30.295	23.6246	40.5412	28.6775	34.5322
BJN34_03175	1-acyl-sn-glycerol-3-phosphate acyltransferase	-0.535319	5.37731	3.99732	0.0455726	0.108472	-0.417426	5.37731	2.45587	0.117086	0.332529	-0.117893	5.37731	0.193574	0.659959	0.839992	35.3481	43.9707	39.1604	44.1571	52.4708	34.5417	45.972	45.6539	48.5677
BJN34_03180	D-glycero-beta-D-manno-heptose-1,7-bisphosphate 7-phosphatase	-1.05636	5.95083	14.8636	0.000115574	0.000707261	-0.568424	5.95083	4.4416	0.0350733	0.150463	-0.487932	5.95083	3.18551	0.074294	0.2618	53.7548	67.5273	58.1498	85.0605	104.23	66.8703	80.0264	112.828	115.043
BJN34_03185	glycine--tRNA ligase subunit beta	-1.15601	7.86188	17.7531	2.52e-05	0.000188063	-0.722681	7.86188	7.07555	0.00781429	0.0516773	-0.433334	7.86188	2.53813	0.111126	0.330089	64.4531	52.9022	68.2943	84.5888	101.898	70.6521	101.134	106.26	134.159
BJN34_03190	hypothetical protein	-1.26696	5.20553	8.58936	0.00338133	0.0125737	-0.42362	5.20553	1.00632	0.315787	0.590603	-0.843344	5.20553	3.85105	0.0497149	0.203443	20.5387	17.3702	45.3341	59.8693	47.5171	52.029	61.1535	40.6643	67.0046
BJN34_03195	glycine--tRNA ligase subunit alpha	-1.25009	7.45565	13.1512	0.000287331	0.00157895	-0.659036	7.45565	3.75188	0.0527481	0.196134	-0.591053	7.45565	2.99817	0.0833588	0.280083	79.9111	82.1034	126.783	171.38	157.022	126.512	191.098	137.008	244.007
BJN34_0320	hypothetical protein	N/A	N/A	N/A	N/A	N/A	N/A	N/A	N/A	N/A	N/A	N/A	N/A	N/A	N/A	N/A	42.6045	29.4298	0	55.2213	46.1442	50.7406	0	28.652	0
BJN34_03200	apolipoprotein N-acyltransferase	-0.147762	6.31428	0.325862	0.568106	0.704653	0.258673	6.31428	1.01055	0.314771	0.590051	-0.406435	6.31428	2.5005	0.11381	0.333958	5.17269	259.246	39.2547	4.89413	2.29831	235.031	34.1007	4.19531	38.0971
BJN34_03205	magnesium/cobalt efflux protein	0.0540657	7.81011	0.06353	0.801001	0.877414	-0.0219835	7.81011	0.0105005	0.918382	0.969548	0.0760492	7.81011	0.126271	0.72233	0.873313	225.052	5.52499	199.164	204.632	220.361	6.21831	173.75	168.393	190.963
BJN34_03210	rRNA maturation RNase YbeY	-1.12534	6.23108	22.4038	2.21e-06	2.26e-05	-0.485338	6.23108	4.34838	0.0370442	0.156054	-0.640002	6.23108	7.28889	0.00693822	0.0559258	53.422	65.5898	47.2588	81.9431	99.9934	80.2517	87.1637	97.194	110.372
BJN34_03215	phosphate starvation-inducible protein PhoH	-0.963979	6.30977	16.189	5.73e-05	0.000383495	-0.588733	6.30977	6.18593	0.012877	0.0738648	-0.375246	6.30977	2.45964	0.116806	0.340965	60.2075	48.0876	38.7701	56.0665	74.1026	62.1728	67.4413	82.1459	83.1399
BJN34_03220	tRNA (N6-isopentenyl adenosine(37)-C2)-methylthiotransferase MiaB	-1.40708	7.0857	22.9948	1.62e-06	1.72e-05	-1.01148	7.0857	12.1664	0.000486577	0.00607038	-0.395606	7.0857	1.85896	0.172745	0.42702	51.9523	45.5075	58.7439	69.0535	82.0946	60.189	126.614	93.8446	118.419
BJN34_03225	hypothetical protein	-1.74418	5.11739	16.2619	5.52e-05	0.000370818	-0.969726	5.11739	5.32294	0.0210465	0.106214	-0.774453	5.11739	3.2774	0.0702402	0.25374	38.7083	34.3131	38.0918	67.4144	73.4099	53.7908	144.012	46.4457	108.831
BJN34_03230	chloride channel protein	-0.53926	5.39242	5.14674	0.0232901	0.0626742	-0.453808	5.39242	3.68052	0.0550518	0.201604	-0.0854516	5.39242	0.128595	0.719893	0.871668	20.5276	20.2103	14.4772	22.3026	17.4661	19.7462	23.3159	19.4836	21.7083
BJN34_03235	RNA helicase	-1.8949	6.6416	13.5108	0.000237196	0.00132876	-1.1042	6.6416	4.81242	0.0282554	0.129261	-0.790701	6.6416	2.4668	0.116274	0.339697	17.9056	21.549	34.0868	52.978	49.3626	31.1024	119.868	35.5975	66.7434
BJN34_03240	stress response serine/threonine protein kinase YihE	-2.15944	5.39992	17.7361	2.54e-05	0.000189337	-1.1289	5.39992	5.22775	0.0222293	0.110023	-1.03054	5.39992	4.22638	0.0398003	0.178923	14.7615	6.90843	18.7593	32.7573	31.4971	22.5095	78.0213	30.3578	38.8175
BJN34_03245	universal stress protein UspA	-0.94152	9.24127	7.21411	0.00723325	0.0236464	0.0246267	9.24127	0.00503151	0.943451	0.978205	-0.966146	9.24127	7.59385	0.00585676	0.0493287	924.077	938.16	411.565	1455.64	1364.57	1613.09	795.082	1809.82	914.319
BJN34_0325	hypothetical protein	1.25999	3.22729	10.4676	0.00121485	0.00535177	1.00683	3.22729	6.54667	0.010508	0.0637868	0.253159	3.22729	0.51725	0.472017	0.716204	41.4576	43.2157	26.9084	28.358	35.0579	29.9021	14.2653	38.1625	16.3251
BJN34_03250	CoA transferase	-0.290192	5.07886	1.04266	0.307204	0.459313	0.251122	5.07886	0.80622	0.36924	0.640596	-0.541314	5.07886	3.73534	0.0532729	0.212601	23.0637	26.4095	17.2513	28.6521	36.7619	32.6668	25.2937	22.6806	17.1629
BJN34_03255	4-carboxymuconolactone decarboxylase	-0.787125	4.00482	4.68599	0.0304095	0.0781282	-0.196687	4.00482	0.30964	0.577901	0.796296	-0.590438	4.00482	2.66356	0.102671	0.316093	17.8148	18.9925	31.3508	38.3328	39.0801	28.8137	29.5141	5.69135	29.6554
BJN34_03260	DNA-binding response regulator	-0.366615	2.68135	0.605384	0.436531	0.584959	0.111031	2.68135	0.0589478	0.808167	0.919899	-0.477646	2.68135	1.07978	0.298748	0.575804	6.10663	10.6783	4.07892	9.67524	6.93893	13.3139	5.97746	4.70497	11.0241
BJN34_03265	murein L,D-transpeptidase	0.474507	6.97307	4.36823	0.036615	0.0907706	0.122554	6.97307	0.29055	0.589868	0.804144	0.351953	6.97307	2.43478	0.11867	0.344517	95.8769	86.2337	66.9213	62.1049	64.33	71.2303	36.5807	59.1238	50.2282
BJN34_03270	twin-arginine translocation pathway signal protein	0.465613	6.53168	3.42144	0.064355	0.142317	0.0801122	6.53168	0.100839	0.750825	0.893132	0.385501	6.53168	2.37499	0.123292	0.353636	192.605	185.891	122.067	114.738	113.48	159.471	73.8557	122.371	97.9175
BJN34_03280	MFS transporter	3.48371	8.9225	86.5934	1.33e-20	7.69e-19	2.74658	8.9225	57.1762	3.98e-14	2.68e-12	0.737132	8.9225	4.71589	0.0298851	0.148009	481.013	462.382	388.396	362.609	219.28	234.378	15.3332	40.6893	42.6388
BJN34_03285	DUF4212 domain-containing protein	N/A	N/A	N/A	N/A	N/A	N/A	N/A	N/A	N/A	N/A	N/A	N/A	N/A	N/A	N/A	1.34269	1.129	0.031593	1.97165	0.996915	0.026117	1.00204	0.949201	0.01495
BJN34_03290	sensor histidine kinase	0.646229	5.19631	6.83116	0.00895811	0.0282965	0.214449	5.19631	0.737262	0.390539	0.661155	0.43178	5.19631	3.19031	0.0740761	0.261436	28.5086	28.9838	19.4336	19.9469	19.56	17.8902	14.1086	11.3374	13.6855
BJN34_03295	DNA-binding response regulator	0.41321	6.46674	2.1954	0.138423	0.255925	0.0432321	6.46674	0.0239448	0.877026	0.953807	0.369978	6.46674	1.77734	0.182476	0.440982	166.244	139.108	96.8208	133.377	84.1857	97.1599	84.6501	63.2157	93.3837
BJN34_0330	zinc ribbon domain-containing protein	0.599984	3.30629	3.24826	0.0714993	0.154273	-0.0629807	3.30629	0.0329837	0.855885	0.942661	0.662964	3.30629	4.14289	0.0418097	0.183222	37.3669	20.0793	48.178	49.2688	29.5099	45.245	31.5271	33.6037	36.7532
BJN34_03300	recombinase RecA	-1.04315	9.31243	11.8752	0.000568875	0.0028317	-0.51051	9.31243	2.89446	0.0888845	0.277348	-0.532641	9.31243	3.14237	0.0762831	0.265553	279.319	314.359	423.77	551.599	523.391	457.003	565.225	476.862	697.739
BJN34_03305	recombination regulator RecX	-1.03961	4.66226	11.0871	0.000869282	0.00404769	-0.421329	4.66226	1.92723	0.165062	0.408174	-0.618285	4.66226	3.9249	0.0475761	0.198001	61.3477	83.7049	32.147	52.6458	46.9554	41.4259	50.4346	43.9229	56.3412
BJN34_03310	DUF4212 domain-containing protein	-0.850201	7.78924	6.48087	0.0109042	0.0333483	-0.307764	7.78924	0.862714	0.35298	0.627641	-0.542437	7.78924	2.65959	0.102927	0.316477	156.895	190.362	221.773	292.498	293.196	273.415	366.193	189.501	277.224
BJN34_03315	succinate--CoA ligase subunit beta	-1.41884	10.4834	21.4098	3.71e-06	3.57e-05	-1.25544	10.4834	16.9037	3.93e-05	0.000754262	-0.163398	10.4834	0.294549	0.58732	0.796414	582.1	546.381	840.88	699.199	896.94	693.372	1320.45	1597.83	1476.56
BJN34_03320	succinate--CoA ligase subunit alpha	-1.43029	10.2554	21.8342	2.97e-06	2.92e-05	-1.41573	10.2554	21.4111	3.71e-06	9.43e-05	-0.0145632	10.2554	0.00234954	0.96134	0.986999	687.833	668.051	920.743	750.8	925.991	700.935	1226.6	2113.85	1810.66
BJN34_03325	hypothetical protein	0.265636	8.11941	0.574355	0.448533	0.595083	-0.118691	8.11941	0.114649	0.734912	0.886112	0.384327	8.11941	1.20176	0.27297	0.54998	309.451	349.217	519.127	306.69	364.324	268.691	299.016	190.617	321.165
BJN34_03330	peptidase	-0.628843	9.98	5.29521	0.0213842	0.0586393	-0.699848	9.98	6.54611	0.0105114	0.0637868	0.0710045	9.98	0.0679773	0.794305	0.91207	1933.17	1858.62	985.427	1574.39	1412.23	1569.75	2021.66	1621.24	2218.91
BJN34_03335	ligase	-1.05817	5.96336	15.4665	8.4e-05	0.000538921	-0.540947	5.96336	4.18013	0.0409005	0.166097	-0.517227	5.96336	3.71494	0.0539275	0.213979	22.5928	18.7695	18.299	29.7172	29.5734	27.8365	40.8975	28.0576	31.0796
BJN34_03340	hypothetical protein	0.277153	2.98108	0.267115	0.605274	0.735759	-0.694733	2.98108	1.57131	0.210016	0.471974	0.971887	2.98108	3.17359	0.0748378	0.262835	26.8192	14.9664	6.23849	6.01554	6.04785	12.0812	14.1621	6.81007	10.0376
BJN34_03345	hypothetical protein	0.0147658	3.25394	0.00112248	0.973273	0.984929	-0.233988	3.25394	0.275582	0.599612	0.810407	0.248753	3.25394	0.319986	0.571616	0.788577	27.8368	25.3703	7.39066	16.1294	18.8195	15.5291	18.6621	13.2449	15.1153
BJN34_0335	twitching motility protein PilT	0.305241	4.63595	1.06883	0.30121	0.452716	0.255872	4.63595	0.751612	0.385966	0.657038	0.0493693	4.63595	0.0292457	0.864213	0.946656	39.3226	58.4522	44.1177	61.724	86.6629	107.49	51.4421	56.6165	47.0442
BJN34_03350	hypothetical protein	0.621214	3.78643	2.50377	0.113574	0.219509	-0.359834	3.78643	0.790199	0.37404	0.645716	0.981048	3.78643	6.18839	0.0128591	0.0848773	44.3684	43.4865	20.6473	16.4286	16.5624	21.4724	11.8215	29.8434	15.0864
BJN34_03355	molybdenum cofactor biosynthesis protein C	-0.916164	5.28322	8.11596	0.00438772	0.0156762	-0.369866	5.28322	1.36895	0.241992	0.514288	-0.546299	5.28322	2.90263	0.0884354	0.289516	77.2482	97.8343	78.2274	63.6368	79.8328	62.8442	88.2597	68.8006	71.4659
BJN34_03360	peptidase M48	0.321516	7.369	2.19478	0.138479	0.255943	0.38942	7.369	3.22383	0.0725734	0.243153	-0.0679036	7.369	0.0994993	0.752431	0.889018	91.939	85.9453	72.4482	91.7939	76.8011	99.2275	43.1289	65.19	55.3361
BJN34_03365	DUF2946 domain-containing protein	0.691604	5.35708	5.8041	0.0159889	0.0458984	0.363109	5.35708	1.58867	0.207516	0.469095	0.328495	5.35708	1.36287	0.243041	0.518906	89.9349	91.6708	45.1835	57.0184	58.4827	64.9772	25.9523	47.1275	39.9669
BJN34_03370	alpha/beta hydrolase	0.276607	5.83377	1.01213	0.314394	0.466555	0.186005	5.83377	0.457345	0.498867	0.74895	0.0906019	5.83377	0.110876	0.739149	0.883457	57.7729	51.0889	39.9602	46.0167	48.0553	47.4676	41.0419	24.9482	31.4443
BJN34_03375	hypothetical protein	-0.734282	5.96905	9.85229	0.0016962	0.00706649	-0.622879	5.96905	7.15904	0.00745869	0.0498976	-0.111403	5.96905	0.225422	0.634939	0.824683	104.768	109.629	82.9216	92.6489	111.096	121.985	118.678	122.026	161.864
BJN34_03380	lipopolysaccharide heptosyltransferase II	-0.727826	6.4117	10.8281	0.000999709	0.00455094	-0.270398	6.4117	1.53384	0.215536	0.479436	-0.457428	6.4117	4.30364	0.0380308	0.173698	53.3448	61.8212	46.698	79.9239	70.7434	75.7314	76.0419	69.0829	71.4275
BJN34_03385	zinc-finger domain-containing protein	-0.686632	6.2086	7.13936	0.00754099	0.0244791	-0.301067	6.2086	1.40033	0.236668	0.50702	-0.385565	6.2086	2.2634	0.132463	0.366346	224.973	288.624	242.246	316.905	373.69	317.329	366.55	328.368	292.264
BJN34_03390	branched chain amino acid aminotransferase	-1.10566	8.91482	22.0232	2.69e-06	2.68e-05	-0.686849	8.91482	8.64457	0.00328037	0.0271042	-0.418809	8.91482	3.21534	0.0729511	0.259366	310.424	279.195	320.949	391.923	450.953	406.677	478.355	575.219	559.892
BJN34_03395	DNA helicase	-0.596107	6.07734	3.34463	0.0674245	0.147317	-0.182995	6.07734	0.32028	0.571439	0.792915	-0.413112	6.07734	1.61528	0.203751	0.469475	14.8346	9.69839	19.9465	21.5596	19.1701	21.4083	13.8022	20.2532	22.6484
BJN34_0340	hypothetical protein	-0.263807	5.22251	0.391618	0.53145	0.672017	-0.232149	5.22251	0.303826	0.581494	0.799202	-0.0316583	5.22251	0.0056628	0.940015	0.977423	120.996	105.057	178.779	226.678	175.397	111.055	139.564	184.931	108.032
BJN34_03400	ABC transporter substrate-binding protein	0.433604	6.64256	1.39912	0.236871	0.381506	0.0239583	6.64256	0.00427215	0.947886	0.979931	0.409646	6.64256	1.25464	0.262669	0.539999	66.6116	78.4172	150.517	84.9713	74.2605	76.8145	49.7551	63.61	72.9308
BJN34_03405	LuxR family transcriptional regulator	0.618852	7.96062	3.60233	0.0576985	0.130387	0.548612	7.96062	2.83511	0.0922243	0.284564	0.0702406	7.96062	0.0469928	0.828381	0.929613	268.828	217.033	54.1051	94.6246	82.2231	242.081	63.9154	52.7821	67.0704
BJN34_03410	LuxR family transcriptional regulator	0.737341	7.59208	9.93613	0.00162066	0.00679265	0.458612	7.59208	3.85528	0.0495896	0.189178	0.278729	7.59208	1.45002	0.228524	0.503302	231.528	191.981	146.548	162.055	139.551	174.738	67.392	107.951	103.048
BJN34_03415	phosphoglycerate kinase	-1.69687	7.97849	17.305	3.18e-05	0.000230082	-0.719078	7.97849	3.25952	0.0710101	0.240075	-0.97779	7.97849	5.93897	0.0148097	0.0931355	58.1237	74.4799	124.864	170.463	229.425	130.254	260.709	190.439	245.659
BJN34_03420	pyruvate kinase	-1.39878	8.02853	21.6974	3.19e-06	3.12e-05	-0.626343	8.02853	4.50462	0.0338034	0.147019	-0.772437	8.02853	6.76714	0.00928514	0.0680321	92.4078	70.1196	100.848	150.127	185.254	126.989	209.179	181.949	177.354
BJN34_03425	fructose-1,6-bisphosphate aldolase	-1.73198	9.12343	41.2157	1.36e-10	3.44e-09	-1.24859	9.12343	22.0334	2.68e-06	7.14e-05	-0.483388	9.12343	3.36352	0.0666553	0.244709	229.287	228.775	255.272	296.589	401.256	324.179	680.211	653.3	603.518
BJN34_03430	phosphoribosylaminoimidazolesuccinocarboxamide synthase	-1.68119	7.67633	30.9833	2.6e-08	4.12e-07	-1.20884	7.67633	16.4961	4.88e-05	0.000888294	-0.472353	7.67633	2.54118	0.110912	0.330035	84.881	94.2502	130.104	125.224	173.491	146.337	272.296	268.072	282.206
BJN34_03435	5-(carboxyamino)imidazole ribonucleotide mutase	-1.35498	6.07585	21.0835	4.4e-06	4.15e-05	-0.904303	6.07585	9.69668	0.00184601	0.0174221	-0.45068	6.07585	2.3566	0.124754	0.355179	62.9133	58.7113	88.4199	105.593	94.708	99.4486	166.961	133.332	143.026
BJN34_03440	5-(carboxyamino)imidazole ribonucleotide synthase	-1.15429	7.08437	16.9356	3.87e-05	0.000273497	-0.832379	7.08437	8.96241	0.0027559	0.0234709	-0.321912	7.08437	1.33603	0.247735	0.524402	63.4778	48.8497	75.1586	72.5671	81.9005	89.0875	119.448	106.026	118.891
BJN34_03445	threonylcarbamoyl-AMP synthase	-1.07567	6.31908	18.4392	1.75e-05	0.000137702	-0.727617	6.31908	8.64014	0.00328837	0.0271379	-0.348055	6.31908	1.93739	0.163953	0.413254	50.4644	38.3524	53.3135	63.4315	60.3961	63.0555	82.3582	83.7001	79.8949
BJN34_03450	IS110 family transposase	0.383822	5.45777	2.15279	0.142311	0.261438	0.177304	5.45777	0.456736	0.499154	0.749043	0.206517	5.45777	0.641371	0.423215	0.683544	44.1	43.6286	27.8448	35.4495	26.133	40.3196	18.9397	30.8604	21.8266
BJN34_03455	branched-chain amino acid transporter	-0.513498	1.53611	0.378435	0.538442	0.67822	-0.945337	1.53611	1.23829	0.265801	0.541255	0.431839	1.53611	0.255889	0.612959	0.810648	6.24867	4.40719	5.72157	5.70506	0	6.69793	7.96908	1.0299	9.85346
BJN34_03460	branched-chain amino acid transporter AzlC	-0.265805	2.66546	0.0766228	0.781927	0.86459	-0.69661	2.66546	0.51756	0.471885	0.728339	0.430805	2.66546	0.199641	0.655011	0.837389	7.38581	10.2071	1.44837	2.78157	9.10838	1.49575	13.0706	1.55394	1.66532
BJN34_03465	D-alanyl-D-alanine carboxypeptidase/D-alanyl-D-alanine-endopeptidase	-0.18103	6.47101	0.66463	0.41493	0.566327	-0.217084	6.47101	0.955908	0.32822	0.601534	0.0360541	6.47101	0.0264756	0.870744	0.949604	50.8537	53.5965	35.7117	43.6685	44.2233	50.3212	40.0789	39.0538	48.8536
BJN34_03470	MarR family transcriptional regulator	1.33118	5.7575	28.0181	1.2e-07	1.62e-06	0.914676	5.7575	13.1824	0.000282585	0.00390542	0.416508	5.7575	3.00883	0.0828121	0.279158	133.576	108.026	93.1634	103.788	78.6781	71.9737	29.3198	35.7284	42.6923
BJN34_03475	branched-chain amino acid ABC transporter substrate-binding protein	2.37805	6.63109	44.3972	2.68e-11	7.51e-10	2.47031	6.63109	47.6893	4.99e-12	2.83e-10	-0.0922601	6.63109	0.0775508	0.780644	0.90452	72.5098	101.218	117.922	153.398	85.1027	86.4482	14.731	13.9578	17.4642
BJN34_03480	flavin-dependent oxidoreductase	1.42059	6.49256	6.61794	0.0100956	0.0311507	1.10383	6.49256	4.04883	0.0442019	0.175024	0.316751	6.49256	0.344331	0.55734	0.778499	57.0303	38.8989	147.726	104.159	53.2266	55.0012	26.5888	17.7079	33.6777
BJN34_03485	hypothetical protein	-1.12569	5.27477	8.07166	0.0044963	0.0159981	-0.35045	5.27477	0.816295	0.366266	0.637993	-0.775244	5.27477	3.86355	0.0493459	0.202577	26.8558	31.8751	70.5061	80.1289	77.4873	78.4801	69.8675	87.5031	83.9556
BJN34_03490	LysR family transcriptional regulator	0.329124	5.31337	1.16979	0.279444	0.429112	0.342492	5.31337	1.26985	0.259794	0.534488	-0.0133685	5.31337	0.00198868	0.96443	0.988281	42.4711	39.6051	38.5611	46.408	38.066	40.5594	13.7064	37.091	28.9093
BJN34_03495	RND transporter	1.24141	4.30833	16.6202	4.57e-05	0.00031744	0.664494	4.30833	4.60803	0.0318226	0.140882	0.576916	4.30833	4.03372	0.0445995	0.190062	21.1999	13.6166	13.0664	9.79999	10.9094	11.7452	5.57748	6.15367	4.26648
BJN34_03500	acriflavin resistance protein	0.108939	4.51687	0.032327	0.857312	0.913938	0.79032	4.51687	1.70328	0.191859	0.448572	-0.68138	4.51687	1.28043	0.257818	0.533899	0.745462	8.61053	5.29239	8.77733	8.31073	7.31018	4.01668	3.44902	3.60177
BJN34_03505	multidrug transporter subunit MdtC	0.620631	5.10668	2.75868	0.0967277	0.195147	0.459478	5.10668	1.51132	0.218938	0.484321	0.161152	5.10668	0.192253	0.661048	0.840451	13.4749	12.4184	7.61404	8.33922	7.95489	14.0053	3.09074	5.41116	9.20997
BJN34_03510	efflux transporter periplasmic adaptor subunit	0.30835	5.22504	1.29259	0.255571	0.402633	0.177108	5.22504	0.425027	0.514439	0.759321	0.131242	5.22504	0.241511	0.623117	0.819772	29.8895	24.9995	18.0499	25.3318	15.1139	27.7359	14.1907	17.7199	15.6672
BJN34_03515	two-component system response regulator OmpR	0.0425099	4.74062	0.0260364	0.871811	0.922062	-0.151216	4.74062	0.325517	0.568311	0.791537	0.193726	4.74062	0.548806	0.458806	0.708331	39.5402	37.2866	21.4712	26.5088	26.4915	33.5711	25.1506	25.6538	25.3794
BJN34_03520	HAMP domain-containing protein	0.13179	4.52761	0.231071	0.630731	0.756484	-0.115363	4.52761	0.174262	0.676352	0.855197	0.247153	4.52761	0.828496	0.362708	0.634778	19.3079	14.9564	15.778	17.2643	12.0568	13.7424	10.7882	10.9589	15.7488
BJN34_03525	glycerol-3-phosphate acyltransferase	0.000481681	5.96107	2.99e-06	0.99862	0.9988	0.182277	5.96107	0.428767	0.512594	0.758539	-0.181796	5.96107	0.430719	0.511637	0.7446	87.015	105.83	64.1721	102.554	87.9859	104.716	74.337	48.1866	82.6079
BJN34_03530	aminoacyl-tRNA deacylase	0.497019	3.86641	2.71643	0.09932	0.198985	0.221739	3.86641	0.528123	0.467397	0.724643	0.275279	3.86641	0.895378	0.344024	0.619355	31.2585	27.32	28.4143	24.9028	28.2617	19.9132	15.8896	19.1997	15.4358
BJN34_03535	site-specific tyrosine recombinase XerD	0.185347	4.88867	0.464213	0.495662	0.641368	0.154287	4.88867	0.322342	0.570204	0.792436	0.03106	4.88867	0.0135159	0.907448	0.962053	27.0502	26.6968	30.2379	26.0999	28.6056	29.929	21.9611	16.5335	21.5175
BJN34_03540	cysteine methyltransferase	-0.268456	5.21731	1.1846	0.276422	0.425888	-0.159982	5.21731	0.425518	0.514197	0.759287	-0.108474	5.21731	0.195653	0.658253	0.839183	54.8567	64.4243	61.9546	67.1646	72.4652	60.6213	58.8873	56.0485	63.1916
BJN34_03545	ABC transporter substrate-binding protein	0.556198	9.50626	4.22272	0.0398863	0.0974153	0.664698	9.50626	6.01809	0.01416	0.0792746	-0.1085	9.50626	0.16212	0.687212	0.855802	585.212	673.518	843.431	876.54	778.145	699.869	350.228	418.587	419.85
BJN34_03550	hypothetical protein	0.773876	6.95746	4.33997	0.0372275	0.0918614	-0.0567626	6.95746	0.0234586	0.87827	0.953982	0.830639	6.95746	5.00611	0.0252581	0.131198	239.424	279.208	154.464	155.798	114.579	110.588	77.013	65.0333	176.182
BJN34_03555	AEC family transporter	-0.539629	5.43385	5.39758	0.0201647	0.0558704	0.0846999	5.43385	0.139527	0.708752	0.874326	-0.624329	5.43385	7.39997	0.0065225	0.0533197	36.6747	27.4864	29.4676	48.7298	50.4174	48.4381	35.4538	40.142	35.0419
BJN34_03560	tRNA epoxyqueuosine(34) reductase QueG	-0.0178625	5.7819	0.00490738	0.944152	0.967916	0.0700957	5.7819	0.0760105	0.782778	0.906044	-0.0879581	5.7819	0.120957	0.727999	0.87583	38.9855	33.7401	40.0678	44.8682	33.9436	45.0996	25.5384	40.4822	28.3191
BJN34_03565	tRNA (adenosine(37)-N6)-threonylcarbamoyltransferase complex ATPase subunit type 1 TsaE	-0.134591	5.46117	0.245165	0.6205	0.74745	0.0732057	5.46117	0.0733766	0.786482	0.908509	-0.207796	5.46117	0.595397	0.44034	0.694355	69.0783	78.7249	57.4493	73.7777	86.0895	81.3942	66.6122	44.0929	70.1091
BJN34_03570	N-acetylmuramoyl-L-alanine amidase	0.720074	8.24052	7.86159	0.0050496	0.0175343	0.418001	8.24052	2.66149	0.102804	0.305763	0.302073	8.24052	1.40358	0.236125	0.511956	280.15	250.288	136.978	167.887	185.874	186.688	88.9034	115.995	120.087
BJN34_03575	bile acid:sodium symporter	-1.67273	6.52084	16.1572	5.83e-05	0.000389243	-0.150177	6.52084	0.139371	0.708907	0.874327	-1.52255	6.52084	13.5057	0.000237838	0.0042663	34.6541	13.9851	47.1045	89.9524	103.069	96.9852	71.2784	99.2798	88.3574
BJN34_03580	LysR family transcriptional regulator	-1.21995	5.22221	18.83	1.43e-05	0.000115592	0.212264	5.22221	0.634666	0.425649	0.689402	-1.43221	5.22221	26.4321	2.73e-07	8.67e-06	16.4727	15.9725	19.0896	52.3691	39.1671	53.0197	35.5349	35.917	26.5503
BJN34_03585	SAM-dependent methyltransferase	-0.0324247	3.66745	0.00619219	0.937279	0.965445	2.13898	3.66745	32.7249	1.06e-08	4.51e-07	-2.1714	3.66745	34.9153	3.44e-09	1.34e-07	6.74416	4.60789	6.51394	25.4028	23.6061	36.5215	5.31943	6.41072	3.37325
BJN34_03590	XRE family transcriptional regulator	0.0588669	4.69679	0.0323505	0.857261	0.913938	-0.175849	4.69679	0.2858	0.592924	0.805456	0.234716	4.69679	0.518537	0.471466	0.716204	40.6718	29.1476	18.7486	28.3722	15.1726	32.3833	20.8202	25.5936	21.7068
BJN34_03595	3-hydroxyacyl-CoA dehydrogenase	-0.760686	7.37192	11.4996	0.000696123	0.00336589	-0.634545	7.37192	8.05494	0.00453798	0.0348878	-0.126141	7.37192	0.317507	0.57311	0.78943	169.021	147.978	136.229	161.973	145.763	198.561	202.062	234.411	186.626
BJN34_03600	IS110 family transposase	-0.0471857	5.95992	0.0271427	0.86914	0.920595	-0.0845487	5.95992	0.0871538	0.767827	0.899566	0.037363	5.95992	0.0171357	0.895852	0.956791	60.4613	64.1788	34.909	47.7351	48.387	60.3449	31.3817	62.191	39.9878
BJN34_03605	IS110 family transposase	0.282617	6.92501	0.838158	0.359924	0.512464	-0.0242739	6.92501	0.0061726	0.937378	0.975707	0.306891	6.92501	0.992053	0.319241	0.59516	147.639	140.59	71.9833	98.6768	85.3093	107.746	56.1525	115.497	67.094
BJN34_03610	adenylate kinase	-1.77769	8.89976	31.1048	2.44e-08	3.92e-07	-0.875199	8.89976	7.90295	0.00493542	0.0371041	-0.902494	8.89976	8.34693	0.0038634	0.036544	231.947	291.742	355.481	646.554	570.52	491.132	964.573	676.654	830.906
BJN34_03615	3-deoxy-manno-octulosonate cytidylyltransferase	-0.296945	6.64139	1.25203	0.263164	0.411506	-0.169852	6.64139	0.411527	0.521196	0.763134	-0.127093	6.64139	0.230437	0.6312	0.823102	111.988	110.358	71.3848	119.791	95.5562	109.226	116.237	82.2895	87.9825
BJN34_03620	hypothetical protein	-0.187741	5.56457	0.634123	0.425847	0.575707	0.0813046	5.56457	0.121094	0.727851	0.884485	-0.269045	5.56457	1.33299	0.248275	0.525062	198.883	194.763	142.323	214.763	199.862	240.656	181.885	145.261	162.409
BJN34_03625	tetraacyldisaccharide 4'-kinase	-0.171684	7.02792	0.574003	0.448672	0.595083	0.0195462	7.02792	0.00748361	0.931063	0.973377	-0.19123	7.02792	0.717629	0.396923	0.661602	98.1841	99.1509	86.2142	114.299	90.7143	126.81	91.3595	86.3846	80.377
BJN34_03630	biopolymer transporter ExbD	-1.15243	4.64394	8.9235	0.00281525	0.0107874	-0.92474	4.64394	5.85847	0.0155022	0.0843185	-0.227688	4.64394	0.346015	0.556378	0.777953	35.2897	38.4165	28.1019	49.5612	38.2824	32.6749	56.8021	32.6538	93.7529
BJN34_03635	flagellar motor protein MotA	-0.891324	5.60209	5.54722	0.0185101	0.0520571	-0.0732699	5.60209	0.0387505	0.843944	0.938116	-0.818054	5.60209	4.7061	0.0300558	0.148224	32.3435	51.9374	45.8571	92.9573	69.4463	74.9836	89.1012	37.8559	67.5644
BJN34_03645	exodeoxyribonuclease VII large subunit	0.504682	6.02427	4.16558	0.0412532	0.100083	0.263873	6.02427	1.13405	0.286912	0.564079	0.240809	6.02427	0.975373	0.323344	0.598106	61.0586	49.696	34.6317	44.3268	41.1763	38.0108	29.1813	26.5036	25.963
BJN34_0365	hypothetical protein	-0.26729	1.60711	0.217131	0.641235	0.763588	0.258032	1.60711	0.225138	0.635152	0.832916	-0.525321	1.60711	0.938182	0.332746	0.606617	76.936	61.7371	28.0185	38.3733	8.29682	5.48233	5.53625	15.7136	20.5971
BJN34_03650	superoxide dismutase	-0.331107	10.6809	1.65518	0.198256	0.333347	-0.620107	10.6809	5.77246	0.0162792	0.087511	0.289	10.6809	1.26109	0.261444	0.538923	2094.01	2772.99	2329.57	1616.74	2133.46	2277.34	2459.51	2341.42	2573.87
BJN34_03655	alpha/beta hydrolase	1.46298	4.91091	17.3055	3.18e-05	0.000230082	0.890719	4.91091	6.39658	0.0114341	0.0678903	0.57226	4.91091	2.90072	0.0885402	0.289722	4.9968	3.0006	3.88648	4.43451	28.9391	44.1736	11.8623	3.6974	2.26061
BJN34_03660	alginate export family protein	0.340041	6.54066	1.52015	0.217597	0.358212	0.180264	6.54066	0.426909	0.513509	0.759287	0.159777	6.54066	0.339991	0.559834	0.779066	68.1124	73.5203	45.7319	54.657	42.7322	72.9765	26.7444	46.9951	46.8096
BJN34_03665	4Fe-4S ferredoxin	0.788502	4.69882	5.09854	0.023946	0.0639176	2.9371	4.69882	77.3523	1.43e-18	1.38e-16	-2.1486	4.69882	48.0413	4.17e-12	2.01e-10	47.7783	28.2647	24.2788	131.138	169.756	149.784	10.5619	16.8225	19.1761
BJN34_03670	LysR family transcriptional regulator	-0.717603	4.93282	3.40008	0.0651932	0.143895	-0.366816	4.93282	0.9062	0.341125	0.615571	-0.350787	4.93282	0.815317	0.366553	0.636714	20.8696	14.6062	18.6146	29.8718	21.5448	19.9663	10.7618	37.0025	27.0737
BJN34_03675	formate dehydrogenase subunit gamma	-2.22802	4.70678	11.461	0.000710711	0.00342685	-2.35214	4.70678	12.6463	0.000376301	0.00489757	0.124116	4.70678	0.0372467	0.846964	0.939051	26.2677	21.916	10.2329	15.5285	13.9865	23.7928	12.4997	141.81	74.2796
BJN34_03680	formate dehydrogenase	-1.32613	5.12056	4.53749	0.0331601	0.0837347	-1.31937	5.12056	4.49617	0.0339708	0.14747	-0.00675668	5.12056	0.000120134	0.991255	0.99856	13.9306	14.842	9.5644	12.916	12.5513	13.5994	3.79469	51.7488	25.6784
BJN34_03685	formate dehydrogenase subunit alpha	-0.224308	5.38578	0.335886	0.562214	0.699258	-0.101857	5.38578	0.0695934	0.79193	0.910966	-0.122451	5.38578	0.100609	0.7511	0.888842	10.963	12.3246	11.0213	13.1212	13.2985	11.8561	4.04397	15.9746	13.6953
BJN34_03690	sufurtransferase FdhD	-0.0520807	3.74502	0.00922037	0.923503	0.956376	0.0131801	3.74502	0.000592123	0.980587	0.990256	-0.0652609	3.74502	0.0146514	0.903657	0.96002	11.6718	12.7393	12.4013	16.1271	10.6457	13.2711	2.19115	11.1371	19.3278
BJN34_03695	formate dehydrogenase	0.0264168	2.41672	0.00268583	0.958668	0.976302	-0.531598	2.41672	1.02691	0.310886	0.587493	0.558015	2.41672	1.16924	0.279558	0.557506	29.6164	15.4791	16.3244	17.5281	4.18859	21.4861	14.1893	14.1669	20.092
BJN34_0370	hypothetical protein	-0.157425	3.97311	0.195005	0.658784	0.778075	0.288641	3.97311	0.679737	0.409677	0.677156	-0.446066	3.97311	1.63936	0.200413	0.464567	46.5653	48.8776	27.6769	50.8863	41.3413	97.4738	34.3369	49.4391	27.0184
BJN34_03700	IS5 family transposase	N/A	N/A	N/A	N/A	N/A	N/A	N/A	N/A	N/A	N/A	N/A	N/A	N/A	N/A	N/A	1.62752	1.33494	0.727059	1.06617	0.757684	1.435	0.442658	0.868719	0.934409
BJN34_03705	transglycosylase	-0.311028	5.88306	1.55028	0.213094	0.352476	0.280635	5.88306	1.29463	0.255196	0.528244	-0.591663	5.88306	5.72337	0.0167406	0.100557	67.8512	69.5988	41.0862	98.6707	76.1008	78.5234	43.4494	64.9922	70.8213
BJN34_03710	lactate dehydrogenase	-0.634643	7.79335	1.99885	0.157418	0.281572	0.326908	7.79335	0.535101	0.46447	0.722046	-0.961551	7.79335	4.55175	0.0328851	0.157679	168.844	174.028	40.6614	250.477	189.421	298.311	105.97	231.095	135.316
BJN34_03715	hypothetical protein	-1.35467	7.9917	14.861	0.000115733	0.000707261	-0.151394	7.9917	0.193263	0.660215	0.848842	-1.20328	7.9917	11.813	0.000588191	0.00885356	104.482	87.3309	38.9747	189.026	130.106	213.326	117.254	223.099	132.632
BJN34_03720	molybdenum cofactor biosynthesis protein MoaA	0.0964394	7.07548	0.105596	0.745214	0.839548	0.939173	7.07548	9.96025	0.00159956	0.0154684	-0.842733	7.07548	8.09186	0.00444644	0.0405094	478.046	468.014	232.675	585.018	713.917	815.599	198.596	351.624	340.517
BJN34_03725	tyrosine protein phosphatase	0.168278	8.22613	0.248165	0.61837	0.746011	0.932882	8.22613	7.52892	0.00607163	0.0431462	-0.764604	8.22613	5.09732	0.0239629	0.126946	366.492	322.262	130.182	403.197	456.2	519.512	135.925	257.755	189.266
BJN34_03730	acetate kinase	0.00928509	5.77492	0.000792238	0.977545	0.987241	0.184355	5.77492	0.313806	0.575354	0.795144	-0.17507	5.77492	0.285096	0.59338	0.80017	35.5695	48.0931	27.6601	50.2138	29.1114	48.8678	18.3506	44.386	27.8189
BJN34_03735	phosphate acetyltransferase	-0.711978	6.4214	10.1151	0.00147061	0.00627386	-0.154439	6.4214	0.490194	0.483841	0.737713	-0.557539	6.4214	6.2518	0.0124067	0.0831597	60.1018	56.8882	48.9141	92.4382	66.3967	91.3578	62.5415	87.8748	71.6382
BJN34_03740	3-hydroxyalkanoate synthetase	-1.25483	8.24941	19.4534	1.03e-05	8.83e-05	-0.306219	8.24941	1.19884	0.273553	0.550126	-0.948608	8.24941	11.2522	0.000795279	0.0112378	78.4596	68.7185	44.3479	118.684	104.805	150.366	89.5344	172.022	109.538
BJN34_03745	hypothetical protein	-0.151421	4.11731	0.0603463	0.805949	0.880747	0.881299	4.11731	2.06482	0.150733	0.388705	-1.03272	4.11731	2.83154	0.0924294	0.296837	52.1672	41.1224	17.3328	75.3084	43.8685	112.551	6.58466	60.1895	35.0169
BJN34_0375	hypothetical protein	-1.34608	2.07506	4.48384	0.0342168	0.0858396	-1.0804	2.07506	3.01346	0.0825758	0.264231	-0.265686	2.07506	0.165026	0.684571	0.854049	27.4839	25.1944	12.8503	22.9858	18.2048	21.9748	26.7103	19.9518	24.5869
BJN34_03750	molybdenum cofactor biosynthesis protein MoaA	-0.124028	4.02952	0.0581694	0.809413	0.882857	0.142953	4.02952	0.0780475	0.779961	0.904602	-0.266981	4.02952	0.273544	0.600964	0.804854	66.6434	62.3078	28.1138	72.9987	26.5366	92.6634	21.1516	74.5974	43.6583
BJN34_03755	molybdenum-dependent transcriptional regulator	-0.078008	4.40195	0.101051	0.750572	0.842452	-0.339797	4.40195	1.86963	0.171517	0.418901	0.26179	4.40195	1.13588	0.286524	0.562883	6.7999	9.16209	17.8874	19.617	5.67421	9.0883	17.7711	9.85594	22.477
BJN34_03760	amino acid transporter	-0.881734	4.20772	4.06979	0.0436566	0.104703	0.166116	4.20772	0.153649	0.695072	0.86559	-1.04785	4.20772	5.8372	0.0156908	0.0965692	14.2984	13.5508	18.5353	19.2692	42.1904	38.1793	27.552	14.3321	28.2929
BJN34_03765	adenylate cyclase	-0.71834	4.92075	8.01674	0.0046347	0.0164231	-0.356806	4.92075	2.05379	0.151828	0.389931	-0.361534	4.92075	2.03222	0.153995	0.399913	36.7657	41.6927	31.8966	42.1809	44.6225	57.3403	49.4016	42.2051	54.8219
BJN34_03770	ABC transporter ATP-binding protein	0.198194	4.89265	0.21327	0.644216	0.766023	-0.419303	4.89265	0.937924	0.332812	0.606738	0.617496	4.89265	2.05242	0.151964	0.398044	46.0153	65.8559	17.384	33.7951	25.399	23.9052	19.2695	45.096	25.6106
BJN34_03775	molybdenum ABC transporter permease subunit	-0.249776	5.25665	0.300802	0.58338	0.718102	-0.171311	5.25665	0.141824	0.706474	0.873505	-0.0784643	5.25665	0.029787	0.862974	0.946247	61.6402	58.5749	13.0911	45.0359	50.1869	42.675	26.6398	59.0951	39.8459
BJN34_03780	molybdate ABC transporter substrate-binding protein	-1.24526	7.34296	17.6298	2.68e-05	0.000198088	-0.497299	7.34296	2.90471	0.0883211	0.276588	-0.747962	7.34296	6.45943	0.0110365	0.0770426	142.318	132.365	59.7146	201.219	188.166	168.767	200.296	244.665	183.681
BJN34_03785	DUF1059 domain-containing protein	0.818786	3.66527	5.57908	0.0181763	0.0513055	0.0533285	3.66527	0.0221926	0.881576	0.955546	0.765458	3.66527	5.10639	0.0238378	0.126478	87.2839	97.5977	43.3699	42.1046	43.5248	48.6658	26.8109	45.0582	30.0165
BJN34_03790	hydroxyacid dehydrogenase	0.853532	5.65093	11.4946	0.000697971	0.00337247	1.04433	5.65093	17.308	3.18e-05	0.000629992	-0.190802	5.65093	0.626206	0.42875	0.686827	59.7586	45.3334	48.2318	63.8955	64.115	50.0149	19.9093	22.746	26.5236
BJN34_03795	nucleoside 2-deoxyribosyltransferase	0.0346601	5.68877	0.0246584	0.875221	0.924075	0.178185	5.68877	0.65856	0.417069	0.683137	-0.143524	5.68877	0.436203	0.508961	0.742175	85.49	85.495	62.3809	92.3907	76.0836	93.5272	61.4876	56.2508	65.5421
BJN34_03800	hypothetical protein	0.105367	5.13911	0.148126	0.700333	0.807228	0.583865	5.13911	4.66503	0.0307829	0.137777	-0.478497	5.13911	3.21806	0.0728299	0.259134	44.445	39.9943	46.7946	77.0142	45.6602	67.0147	30.6662	30.6311	38.3147
BJN34_03805	mammalian cell entry protein	-0.189941	6.39459	0.635259	0.425433	0.575331	0.106123	6.39459	0.200569	0.654262	0.846018	-0.296064	6.39459	1.56296	0.211232	0.481225	38.2263	34.676	43.4791	51.1529	42.9554	53.9851	33.5348	35.6195	40.149
BJN34_03810	paraquat-inducible membrane protein A	0.0571065	4.81718	0.0573534	0.810729	0.883735	0.353007	4.81718	2.26113	0.132657	0.357678	-0.295901	4.81718	1.64643	0.199446	0.463566	30.9972	29.1402	28.0767	36.968	31.3059	43.1421	20.4379	23.3524	25.7087
BJN34_03815	paraquat-inducible membrane protein A	0.0714006	1.2943	0.0165963	0.897495	0.938567	0.0241641	1.2943	0.00190003	0.965232	0.985289	0.0472366	1.2943	0.00798287	0.928806	0.972781	3.37783	1.86376	1.77246	2.19837	2.33311	1.99355	1.68348	1.67045	1.83323
BJN34_03820	AI-2E family transporter	-0.353635	6.8687	2.76964	0.096068	0.194137	-0.111644	6.8687	0.278829	0.59747	0.809249	-0.241991	6.8687	1.30578	0.25316	0.530031	89.2233	77.6938	63.4757	97.9426	78.6962	100.987	70.412	80.594	87.6507
BJN34_03825	IS110 family transposase	-0.0388355	8.23174	0.0193181	0.889458	0.933406	-0.10901	8.23174	0.152153	0.696486	0.86626	0.0701741	8.23174	0.0631547	0.801578	0.915258	297.434	312.338	175.508	228.303	234.219	290.624	157.607	302.386	193.994
BJN34_03830	IS110 family transposase	0.407529	4.84764	2.49776	0.114008	0.220071	0.190744	4.84764	0.541022	0.46201	0.720648	0.216785	4.84764	0.740007	0.389659	0.656607	28.0037	29.482	18.031	22.1041	18.4207	25.4406	12.9341	18.957	14.1328
BJN34_03835	hypothetical protein	0.220519	1.84461	0.183986	0.66797	0.784455	-0.665395	1.84461	1.45448	0.22781	0.493887	0.885914	1.84461	2.79303	0.0946753	0.301089	9.26054	14.1686	5.88844	6.68924	1.74407	6.46024	4.55447	10.0089	5.55926
BJN34_03840	group II intron reverse transcriptase/maturase	0.989265	7.78103	16.5302	4.79e-05	0.00033054	0.0440385	7.78103	0.033019	0.855809	0.942661	0.945226	7.78103	15.195	9.7e-05	0.00195164	214.059	182.743	179.86	120.005	77.3825	110.277	62.4611	98.1416	77.7132
BJN34_03845	HPP family protein	3.78257	4.41631	37.3346	9.95e-10	2.18e-08	-0.992958	4.41631	2.33178	0.126757	0.34828	4.77553	4.41631	53.0954	3.18e-13	1.64e-11	25.6685	26.9209	69.8065	2.48828	0.642259	1.397	2.15107	3.49411	1.84827
BJN34_0385	hypothetical protein	-0.376998	4.51809	1.29873	0.254445	0.401499	-0.110087	4.51809	0.113016	0.736736	0.886695	-0.26691	4.51809	0.66027	0.416465	0.680095	28.4364	22.9288	15.0924	31.2931	17.5066	32.089	24.3505	17.3786	27.0788
BJN34_03850	chloride channel protein	3.11314	3.69432	16.2019	5.69e-05	0.000381265	-0.0427672	3.69432	0.00314257	0.955295	0.981666	3.1559	3.69432	16.8469	4.05e-05	0.000932078	14.1412	10.655	18.7494	3.14694	0	2.03976	0.833215	1.37767	1.88084
BJN34_03855	AsnC family transcriptional regulator	0.448423	3.79681	1.23631	0.266184	0.414357	-0.381809	3.79681	0.853601	0.355536	0.630082	0.830232	3.79681	4.1957	0.0405266	0.180451	43.216	32.3025	32.6023	22.2585	16.7683	22.4057	14.5732	37.7173	12.8642
BJN34_03860	amidinotransferase	0.573316	4.92692	2.29999	0.129375	0.243752	-0.959141	4.92692	6.05194	0.013891	0.0782598	1.53246	4.92692	15.5371	8.09e-05	0.00167217	68.1179	38.2571	28.1812	14.4479	14.8776	17.0884	17.6351	16.9655	37.9689
BJN34_03865	ornithine cyclodeaminase	0.125152	4.75645	0.0917163	0.762007	0.850967	-0.857842	4.75645	4.13239	0.04207	0.169455	0.982994	4.75645	5.47062	0.0193388	0.109714	41.6333	26.4795	13.0337	15.4936	11.2436	13.9457	14.4122	13.7662	31.1236
BJN34_03870	DNA-binding protein	0.642996	7.1723	3.81575	0.0507728	0.117931	-0.118995	7.1723	0.130812	0.717592	0.880178	0.761991	7.1723	5.3547	0.0206665	0.115306	341.262	383.245	148.199	157.507	149.574	205.744	113.785	202.273	131.01
BJN34_03875	Fis family transcriptional regulator	0.487485	5.83332	3.78223	0.0517995	0.119913	0.409046	5.83332	2.66272	0.102725	0.305659	0.078438	5.83332	0.101644	0.749866	0.888398	51.596	39.776	35.5065	50.7143	31.8866	40.0301	21.8269	28.8239	22.5849
BJN34_03880	two-component sensor histidine kinase	-0.103981	6.12072	0.198369	0.656041	0.775555	0.0752084	6.12072	0.10469	0.746273	0.89228	-0.17919	6.12072	0.598601	0.439112	0.69395	30.7172	31.5697	24.3285	35.4901	30.7537	33.5436	28.3686	23.6809	22.5823
BJN34_03885	dicarboxylate/amino acid:cation symporter	-1.96746	3.51664	18.3744	1.81e-05	0.000141662	-2.18623	3.51664	22.135	2.54e-06	6.82e-05	0.21877	3.51664	0.205428	0.650375	0.834698	2.35447	6.22036	2.58036	3.94039	3.4511	2.20031	9.62182	9.31226	17.5878
BJN34_03890	MFS transporter	0.292747	3.19775	0.644284	0.422164	0.572499	0.0250361	3.19775	0.0046026	0.945911	0.979147	0.267711	3.19775	0.566605	0.451611	0.704745	5.35207	6.11933	7.49531	5.18122	5.25985	5.96513	5.01896	4.3836	3.23594
BJN34_03895	urocanate hydratase	0.984627	3.90445	8.65731	0.00325751	0.0121787	0.0554698	3.90445	0.0256648	0.872722	0.951759	0.929157	3.90445	8.07207	0.00449527	0.0407669	12.0657	11.6705	8.90262	7.83544	3.86713	5.77797	5.29587	3.63517	4.14718
BJN34_03900	histidine utilization repressor	-0.74293	5.49709	3.46799	0.0625672	0.139163	0.477369	5.49709	1.48127	0.223576	0.488495	-1.2203	5.49709	9.36192	0.0022154	0.0244416	24.2679	24.0546	45.1702	80.7641	57.8778	93.3655	54.3761	29.6264	45.3245
BJN34_03905	diguanylate cyclase	0.351477	7.02564	0.410386	0.521774	0.664844	1.72677	7.02564	9.45314	0.00210788	0.0192039	-1.37529	7.02564	6.13141	0.0132801	0.086583	12.1288	13.6193	39.3451	79.0645	36.8223	68.5467	9.6203	23.8837	11.0282
BJN34_03910	MFS transporter	0.16979	2.47906	0.110783	0.739254	0.835962	0.542501	2.47906	1.18207	0.276935	0.553071	-0.372711	2.47906	0.591469	0.441851	0.695472	3.05101	3.70071	2.34462	5.95936	2.07816	4.0423	0.891943	3.39094	2.34449
BJN34_03915	GNAT family N-acetyltransferase	1.04084	4.26185	8.07884	0.00447851	0.0159512	0.710495	4.26185	3.72865	0.0534865	0.197726	0.330346	4.26185	0.888042	0.346009	0.620449	46.0625	45.3692	23.0101	37.3321	25.89	28.2645	15.8464	18.9998	8.57988
BJN34_03920	nuclear transport factor 2 family protein	1.50461	2.75361	12.4165	0.000425555	0.0022088	0.32607	2.75361	0.508044	0.475987	0.731285	1.17854	2.75361	8.57325	0.00341138	0.0331747	29.2175	19.0011	17.7733	9.29154	5.36599	14.7122	4.60993	7.59015	6.13386
BJN34_03925	cytochrome C	0.843565	2.80361	2.76773	0.0961828	0.194273	-0.209034	2.80361	0.157372	0.691588	0.864048	1.0526	2.80361	4.35084	0.0369907	0.170522	13.2105	8.6883	5.66972	5.88883	2.02489	5.4311	1.62745	4.70402	6.06463
BJN34_03930	acyltransferase	1.69211	2.82435	10.1593	0.00143574	0.00615927	2.50533	2.82435	23.8326	1.05e-06	3.11e-05	-0.813222	2.82435	3.47844	0.0621733	0.23358	4.92578	6.25155	3.72436	7.85487	12.3902	6.75354	0.45437	1.09554	2.22284
BJN34_03935	(2Fe-2S)-binding protein	1.12371	6.42225	22.6376	1.96e-06	2.02e-05	-0.0414754	6.42225	0.0303883	0.861612	0.946202	1.16519	6.42225	24.592	7.08e-07	2.06e-05	267.962	282.842	210.81	97.5441	115.523	130.733	70.9051	100.058	114.022
BJN34_03940	carbon monoxide dehydrogenase	1.24807	8.32398	23.1762	1.48e-06	1.58e-05	-0.0120689	8.32398	0.00221189	0.962489	0.985078	1.26014	8.32398	23.6827	1.14e-06	3.21e-05	218.057	201.206	187.021	77.0426	81.2962	100.36	44.4605	83.057	83.3907
BJN34_03945	transcriptional regulator	1.15487	3.82961	7.16243	0.00744465	0.0242003	0.410541	3.82961	0.883052	0.347367	0.62101	0.744332	3.82961	3.16983	0.0750103	0.263106	31.1469	26.763	8.39606	12.7922	10.9477	15.6639	6.1386	10.0567	7.1965
BJN34_03950	RNA polymerase subunit sigma	1.65753	4.40435	4.14216	0.0418276	0.101087	0.414425	4.40435	0.267694	0.604883	0.813876	1.2431	4.40435	2.40284	0.121115	0.349272	63.0305	55.6308	30.4431	7.91179	18.3002	37.0867	3.06904	32.0922	3.47867
BJN34_03955	serine/threonine protein phosphatase	1.04857	4.32358	10.7146	0.00106294	0.00479152	-0.0903193	4.32358	0.0743278	0.785137	0.907279	1.13888	4.32358	12.8989	0.000328767	0.00559307	36.1919	37.217	18.0235	12.0305	15.7815	13.2722	8.72644	12.9215	13.2579
BJN34_03960	hypothetical protein	0.84182	2.18313	2.31437	0.128183	0.241837	0.22147	2.18313	0.150776	0.697795	0.867264	0.62035	2.18313	1.35802	0.243881	0.519848	9.89252	19.7833	8.24281	9.37715	5.18032	10.7189	2.00719	9.62843	5.86261
BJN34_03965	transcriptional regulator	1.65951	6.23883	22.4409	2.17e-06	2.22e-05	0.103729	6.23883	0.0894309	0.764902	0.899239	1.55579	6.23883	20.0342	7.61e-06	0.000198008	625.792	452.31	198.308	162.191	131.207	136.218	79.4246	131.245	110.4
BJN34_03970	lytic transglycosylase F	0.561826	1.85557	0.634041	0.425877	0.575707	-0.396823	1.85557	0.292687	0.588504	0.803708	0.958649	1.85557	1.83339	0.175728	0.43116	4.44991	1.69042	0.925846	1.67733	0.246993	1.65338	1.44186	0.555904	1.53751
BJN34_03975	hypothetical protein	0.358639	2.95468	0.845089	0.357945	0.509962	0.463046	2.95468	1.43457	0.231021	0.498948	-0.104407	2.95468	0.0805005	0.77662	0.902507	15.7433	22.3716	9.38598	14.2408	17.471	19.055	7.58139	12.7374	9.58558
BJN34_03980	DUF1120 domain-containing protein	-0.184187	4.78705	0.469761	0.493097	0.639604	-0.550222	4.78705	4.08183	0.0433468	0.172916	0.366035	4.78705	1.82024	0.177285	0.433031	38.6862	43.4515	24.4895	25.1209	26.4662	31.7825	23.4749	37.3388	38.1528
BJN34_03985	hypothetical protein	0.324599	3.4267	0.302567	0.582278	0.71751	0.749901	3.4267	1.6313	0.201524	0.46036	-0.425302	3.4267	0.543203	0.461108	0.70965	12.3517	13.7625	7.27566	7.1744	29.3133	7.68768	5.20524	9.96898	6.51453
BJN34_03990	hypothetical protein	0.769439	1.43967	0.655178	0.418267	0.568589	1.2367	1.43967	1.73268	0.188069	0.445041	-0.467263	1.43967	0.27687	0.59876	0.80346	1.93145	2.5143	2.10147	0.645379	6.40471	1.87284	1.537	1.24601	0
BJN34_03995	pirin family protein	0.326908	3.00529	0.0681283	0.794082	0.872524	0.762017	3.00529	0.368239	0.543966	0.775942	-0.435109	3.00529	0.121867	0.727019	0.87583	11.9527	13.2939	0	7.67184	10.9917	13.9817	0	8.00404	8.0349
BJN34_04000	isochorismatase	0.218681	2.95053	0.368488	0.54383	0.683196	-0.0419741	2.95053	0.013148	0.908711	0.966491	0.260655	2.95053	0.549681	0.458448	0.708074	11.1122	9.43927	7.68877	7.15645	7.93577	8.59153	5.3507	4.72705	9.45738
BJN34_04005	LysR family transcriptional regulator	0.557765	4.60122	4.58663	0.0322223	0.0817842	0.23622	4.60122	0.805224	0.369536	0.640788	0.321544	4.60122	1.61907	0.203221	0.468848	26.8628	32.5377	23.2794	20.0301	22.8206	24.2393	14.2223	18.1494	12.8784
BJN34_04010	hypothetical protein	0.67237	3.84186	0.231219	0.630622	0.756484	0.674063	3.84186	0.232424	0.629732	0.828651	-0.00169331	3.84186	1.49e-06	0.999028	0.999848	9.14402	9.91064	6.195	7.64519	8.09939	9.9185	0	13.4107	0
BJN34_04015	hypothetical protein	0.186405	3.75792	0.17725	0.673747	0.788398	-0.818276	3.75792	3.20911	0.0732295	0.244593	1.00468	3.75792	4.92899	0.0264098	0.135053	54.6581	48.6229	20.0342	17.5054	17.6593	25.168	16.8376	47.709	22.1984
BJN34_04020	IS5 family transposase	0.432988	2.1295	0.823238	0.364235	0.51722	-0.651661	2.1295	1.58527	0.208003	0.469322	1.08465	2.1295	4.87077	0.0273153	0.138558	5.14563	5.7442	2.61352	2.27997	1.61606	2.3642	1.4881	4.63246	2.14571
BJN34_04025	co-chaperone GroES	0.775452	10.887	4.20256	0.040363	0.0983369	0.474383	10.887	1.58421	0.208155	0.469467	0.301069	10.887	0.640183	0.423644	0.683544	5641.83	6425.03	8889.82	5468.2	7426.33	4708.94	1947.84	4923.63	3536.01
BJN34_04030	chaperonin GroL	0.852598	13.2619	5.21004	0.0224568	0.0609052	0.469694	13.2619	1.5969	0.206343	0.467055	0.382905	13.2619	1.06297	0.302538	0.578739	5291.54	5838.12	8637.5	4866.37	6489.7	4385.49	1820.09	4302.21	3193.03
BJN34_04035	metallophosphoesterase	0.351949	7.1388	1.31477	0.251532	0.398629	0.026426	7.1388	0.00740812	0.93141	0.973447	0.325523	7.1388	1.12976	0.287827	0.564406	226.403	191.668	140.809	146.642	124.668	181.421	69.0592	175.473	114.766
BJN34_04040	hypothetical protein	0.455729	5.77085	3.30066	0.0692519	0.150502	0.204727	5.77085	0.662104	0.415818	0.681773	0.251001	5.77085	1.02966	0.310239	0.587876	49.7802	65.022	34.0029	39.6855	37.9987	48.466	27.0463	28.6007	31.433
BJN34_04045	pilus assembly protein TadE	-1.16473	1.64133	2.81006	0.0936748	0.190207	0.59917	1.64133	0.97659	0.323042	0.597874	-1.7639	1.64133	7.21142	0.00724412	0.0574551	0.275358	1.74346	3.61569	9.24352	10.1275	4.55609	5.52835	2.81002	3.4326
BJN34_04055	type II secretion system protein	0.168725	3.63428	0.175671	0.67512	0.7891	0.514504	3.63428	1.67419	0.195698	0.453126	-0.345779	3.63428	0.789404	0.37428	0.643056	13.9759	11.3059	4.97939	17.5177	11.3888	9.68356	7.39773	6.46131	7.38148
BJN34_04060	pilus assembly protein TadB	0.603803	2.31316	1.76459	0.184053	0.316332	0.173557	2.31316	0.137569	0.71071	0.875615	0.430246	2.31316	0.980896	0.321978	0.596615	4.30821	6.47228	3.51626	4.47137	2.50444	3.92795	1.10993	2.74424	3.74775
BJN34_04065	pilus assembly protein CpaF	0.880504	3.20501	5.9588	0.014644	0.0427513	0.473093	3.20501	1.6479	0.199245	0.45766	0.407412	3.20501	1.44803	0.228844	0.503302	9.53157	5.81832	5.79342	4.60327	6.13553	5.47296	2.492	3.82474	3.02495
BJN34_04070	pilus assembly protein CpaE	0.176444	3.31489	0.264932	0.606752	0.73614	-0.395019	3.31489	1.24246	0.264997	0.540442	0.571463	3.31489	2.74747	0.0974086	0.306571	10.0737	7.86411	6.17452	4.80461	5.64684	5.81396	3.55168	8.03383	5.72709
BJN34_04075	hypothetical protein	0.499893	1.50986	0.702883	0.401817	0.554771	0.878767	1.50986	2.3616	0.124354	0.343724	-0.378874	1.50986	0.523271	0.46945	0.715954	4.9929	2.9812	6.80667	6.11147	5.0767	9.02845	1.26389	4.68793	2.65049
BJN34_04080	secretin	0.674725	2.80237	0.83707	0.360236	0.512593	0.374926	2.80237	0.257463	0.611869	0.818441	0.299799	2.80237	0.171284	0.678974	0.851206	2.77229	4.02125	3.99668	3.05719	2.71575	3.15139	0	3.49137	2.16888
BJN34_04085	Flp pilus assembly protein CpaB	0.221112	2.61189	0.37638	0.539547	0.67924	-0.701116	2.61189	3.20675	0.0733352	0.244828	0.922228	2.61189	6.06503	0.0137884	0.0888103	7.6469	7.48158	6.25669	4.65642	3.90161	2.6691	4.21159	6.67768	4.00902
BJN34_04090	ATPase	-1.28436	1.40384	0.794105	0.372862	0.525734	-0.0962602	1.40384	0.00474894	0.945059	0.979071	-1.1881	1.40384	0.687133	0.407141	0.670723	0	0	1.69852	0	1.38829	3.23064	1.03457	0.719154	2.22853
BJN34_04095	peptidase A24	0.00621759	0.880026	4.32e-05	0.994754	0.996481	-0.488891	0.880026	0.211907	0.645277	0.839988	0.495108	0.880026	0.225671	0.634752	0.824683	1.00865	3.99835	0.955395	1.04112	1.8966	0.680456	4.46477	0	0.499652
BJN34_04100	pilus assembly protein	N/A	N/A	N/A	N/A	N/A	N/A	N/A	N/A	N/A	N/A	N/A	N/A	N/A	N/A	N/A	0	0	0	0	1.69765	1.66718	1.15088	0	6.88136
BJN34_04105	pilus assembly protein PilA	N/A	N/A	N/A	N/A	N/A	N/A	N/A	N/A	N/A	N/A	N/A	N/A	N/A	N/A	N/A	4.58068	6.17676	10.1377	6.88554	1.86808	4.20908	2.64952	3.90989	3.8208
BJN34_04110	hypothetical protein	0.0877481	2.51489	0.018571	0.891604	0.934241	0.513212	2.51489	0.652467	0.419232	0.685051	-0.425464	2.51489	0.461593	0.49688	0.731533	1.9051	4.11377	1.91996	4.58091	3.08898	3.52042	0.333636	1.79105	4.30483
BJN34_04115	glycosyltransferase	0.744147	3.70988	3.92695	0.047518	0.112139	0.630032	3.70988	2.80158	0.0941714	0.28877	0.114115	3.70988	0.101903	0.749558	0.888398	12.3242	19.1801	7.01002	10.6609	10.3249	14.6323	5.2608	6.42748	6.54343
BJN34_04120	GtrA family protein	N/A	N/A	N/A	N/A	N/A	N/A	N/A	N/A	N/A	N/A	N/A	N/A	N/A	N/A	N/A	0	1.59263	0	3.91229	0	0.90881	0.322293	0.6716	0
BJN34_04125	methyltransferase	-0.185397	1.07246	0.0330622	0.855716	0.913362	-0.0476002	1.07246	0.00219935	0.962595	0.985078	-0.137797	1.07246	0.0188459	0.890809	0.95505	2.16881	1.87056	0.435132	0	0.747949	4.32102	1.09844	0.185122	2.60826
BJN34_04130	Fis family transcriptional regulator	-0.4284	2.05078	0.936072	0.33329	0.485321	-0.432141	2.05078	0.961758	0.326744	0.601217	0.00374022	2.05078	7.02e-05	0.993317	0.998834	1.93116	2.00195	1.86765	1.79132	2.73012	1.28702	1.8592	2.45795	1.94909
BJN34_04135	LysR family transcriptional regulator	-0.416562	5.46557	2.17429	0.140334	0.258501	-0.56919	5.46557	4.0339	0.0445946	0.176039	0.152628	5.46557	0.289609	0.590471	0.798359	41.7848	38.0384	30.3546	39.4997	23.4676	38.1256	46.3652	31.7273	39.1579
BJN34_04140	MFS transporter	-1.73174	4.66063	17.2744	3.24e-05	0.000232852	-0.462154	4.66063	1.35545	0.244327	0.51594	-1.26958	4.66063	9.40388	0.00216526	0.0240261	6.98499	8.28134	6.9864	21.5866	20.0595	13.4833	29.7259	12.6402	16.9933
BJN34_04145	hypothetical protein	0.72864	5.6568	7.69149	0.00554817	0.0189239	0.50714	5.6568	3.71457	0.0539395	0.198976	0.2215	5.6568	0.745419	0.38793	0.655449	110.297	119.286	87.6944	84.9341	93.3786	97.9563	35.0447	72.0547	49.3436
BJN34_04150	hypothetical protein	0.109056	6.57139	0.225078	0.635197	0.759473	0.4067	6.57139	3.15248	0.0758115	0.250438	-0.297645	6.57139	1.71228	0.190689	0.4531	98.0555	104.921	74.1988	104.205	119.75	121.142	59.0635	85.7284	63.9868
BJN34_04155	LemA family protein	-0.295097	7.74755	1.84849	0.173959	0.303628	-0.262366	7.74755	1.46366	0.226349	0.491607	-0.0327303	7.74755	0.0227941	0.879994	0.952913	298.545	274.332	255.788	271.876	246.656	350.867	235.11	300.529	295.492
BJN34_04160	glutamate-1-semialdehyde-2,1-aminomutase	-0.174193	7.06584	0.591477	0.441849	0.589507	-0.218095	7.06584	0.927289	0.335568	0.610317	0.0439018	7.06584	0.037671	0.846105	0.938851	91.8557	77.9287	90.4045	84.7532	87.8492	86.4563	68.6065	82.1463	90.7983
BJN34_04165	rubredoxin	-0.622866	6.76229	4.45502	0.0347988	0.0869695	0.134582	6.76229	0.212098	0.645128	0.839952	-0.757447	6.76229	6.61175	0.0101308	0.0730686	306.993	459.63	402.404	756.684	661.786	618.114	599.909	430.154	427.394
BJN34_04170	two-component system response regulator	0.698159	7.16733	8.79745	0.00301652	0.0114258	0.557008	7.16733	5.60707	0.0178881	0.0939739	0.141151	7.16733	0.369425	0.543318	0.767428	314.511	363.29	201.054	262.89	259.183	279.456	120.995	160.759	154.446
BJN34_04175	two-component system response regulator	0.576074	6.47974	4.10947	0.0426437	0.102594	0.311079	6.47974	1.19788	0.273745	0.550192	0.264995	6.47974	0.886543	0.346416	0.620449	293.571	326.509	147.059	190.814	238.233	205.401	116.678	135.287	159.094
BJN34_04180	chemotaxis protein CheW	0.79528	5.60563	9.21208	0.00240423	0.00944608	0.4332	5.60563	2.71326	0.0995173	0.29907	0.36208	5.60563	2.00147	0.157147	0.403685	113.924	118.617	59.2131	75.1173	78.3661	72.9534	39.3754	46.3734	48.5562
BJN34_04185	chemotaxis protein	-0.0936734	7.63032	0.0846407	0.771104	0.858302	0.107564	7.63032	0.111781	0.738125	0.887596	-0.201238	7.63032	0.391548	0.531487	0.759236	76.7109	90.2647	54.3264	89.5514	92.6238	73.6485	33.4189	71.5786	89.1945
BJN34_04190	hybrid sensor histidine kinase/response regulator	0.0620028	8.4376	0.0640548	0.800198	0.877068	0.235477	8.4376	0.92434	0.336338	0.611074	-0.173474	8.4376	0.503177	0.478107	0.719812	55.8944	52.3218	42.6372	59.167	65.9675	46.6397	30.2317	43.9392	43.9037
BJN34_04195	hypothetical protein	-0.016015	3.94352	0.00280363	0.957772	0.975812	0.0429613	3.94352	0.0204174	0.886377	0.957454	-0.0589763	3.94352	0.0396371	0.842192	0.936615	14.1512	17.9099	16.0296	20.6392	13.074	18.2382	11.4795	11.9997	16.5194
BJN34_04200	MFS transporter	0.0692531	6.96222	0.108593	0.741751	0.837828	-0.0224289	6.96222	0.0113803	0.915044	0.969325	0.091682	6.96222	0.191919	0.661325	0.8405	87.124	92.4229	78.6823	88.7167	79.8585	78.8937	56.5135	74.8822	69.8107
BJN34_04205	3-oxoacyl-ACP reductase	-0.175907	6.49685	0.633151	0.426202	0.575922	0.0435551	6.49685	0.0391825	0.843088	0.937456	-0.219462	6.49685	0.997335	0.317956	0.594094	98.1905	96.5005	87.6801	134.043	98.0707	104.526	74.8869	98.548	87.091
BJN34_04210	hypothetical protein	-0.220433	5.04008	0.818731	0.365551	0.518345	0.170353	5.04008	0.505847	0.476942	0.732228	-0.390785	5.04008	2.67013	0.102248	0.315162	87.5635	120.438	92.5868	142.474	116.562	144.611	77.862	104.162	105.614
BJN34_04215	aldehyde dehydrogenase	-0.401521	6.82756	3.50634	0.0611342	0.136416	-0.173648	6.82756	0.662527	0.415669	0.68169	-0.227874	6.82756	1.1357	0.286563	0.562883	64.2587	60.0177	53.1264	66.883	66.5551	78.5258	50.3396	70.565	70.9509
BJN34_04220	inorganic pyrophosphatase	-1.30874	8.58028	32.1686	1.41e-08	2.44e-07	-0.683885	8.58028	9.03827	0.00264386	0.0227688	-0.624858	8.58028	7.48953	0.00620587	0.0513375	360.993	366.837	398.746	585.294	619.729	580.696	663.696	810.51	827.221
BJN34_04225	cytochrome B	-1.79806	6.0529	26.6597	2.43e-07	3.07e-06	-0.209116	6.0529	0.394701	0.529839	0.768835	-1.58895	6.0529	21.0589	4.45e-06	0.000119529	53.5152	46.441	22.9188	122.453	107.816	142.092	103.698	164.506	74.8142
BJN34_04230	GNAT family N-acetyltransferase	0.554524	6.52109	5.96027	0.0146318	0.0427513	0.186056	6.52109	0.667584	0.413895	0.68023	0.368468	6.52109	2.68815	0.101097	0.312754	83.6271	88.2217	62.9215	62.4135	61.2804	60.5743	41.9054	36.7775	50.0257
BJN34_04235	NAD(+) synthase	-0.499141	7.26486	5.52745	0.0187203	0.0525627	-0.590296	7.26486	7.71104	0.00548841	0.0400862	0.0911554	7.26486	0.18402	0.667941	0.84416	66.9803	63.7522	46.4204	54.4921	50.6612	63.4814	63.2829	72.8199	65.8552
BJN34_04240	P-II family nitrogen regulator	-0.985132	7.90672	18.4792	1.72e-05	0.00013546	-0.638163	7.90672	7.87556	0.00501073	0.0375886	-0.346969	7.90672	2.31836	0.127855	0.360745	412.978	421.145	464.185	617.232	545.619	539.481	618.663	801.806	699.082
BJN34_04245	trimeric intracellular cation channel family protein	-0.035581	4.25981	0.0127482	0.910104	0.946968	0.286848	4.25981	0.851482	0.356133	0.630206	-0.322429	4.25981	1.10042	0.294175	0.57071	27.8715	29.7583	12.9369	29.4252	26.2613	32.5444	15.9916	17.718	24.2613
BJN34_04250	DNA mismatch repair protein MutS	-0.389589	5.9798	2.40493	0.120954	0.230839	-0.388377	5.9798	2.39491	0.12173	0.340056	-0.00121234	5.9798	2.33e-05	0.99615	0.999406	80.2404	76.6339	63.8128	78.5828	72.7044	73.7446	92.9251	65.8299	72.9986
BJN34_04255	thioredoxin-disulfide reductase	-0.691202	7.99553	8.95969	0.00276002	0.0106169	-0.52531	7.99553	5.2076	0.0224883	0.110667	-0.165891	7.99553	0.519137	0.47121	0.716123	191.271	180.17	181.728	215.235	230.851	187.755	209.615	236.422	287.188
BJN34_04260	cell division protein FtsK	-0.280292	8.08836	1.64731	0.199326	0.334415	-0.200597	8.08836	0.845573	0.357808	0.631344	-0.0796954	8.08836	0.133532	0.714798	0.870023	98.9871	103.067	78.9349	114.347	85.5892	102.91	79.8476	88.0546	109.44
BJN34_04265	outer membrane lipoprotein carrier protein LolA	-0.148382	6.36367	0.373888	0.540893	0.680472	0.0441274	6.36367	0.0333159	0.85517	0.942415	-0.192509	6.36367	0.636597	0.424946	0.684705	106.591	123.75	82.5888	125.847	101.023	137.631	99.3482	78.4883	100.748
BJN34_04270	hypothetical protein	-0.0172459	4.86267	0.00343008	0.953297	0.97364	-0.0316689	4.86267	0.0115917	0.914262	0.969093	0.0144231	4.86267	0.00244694	0.960548	0.986477	71.1841	62.1651	39.0762	52.213	50.3439	69.4631	50.0745	34.7927	53.8396
BJN34_04275	hypothetical protein	-0.0774228	3.60012	0.0523878	0.818959	0.890211	-0.284377	3.60012	0.694521	0.404631	0.672735	0.206954	3.60012	0.376769	0.539337	0.764237	38.967	30.4626	20.3039	27.0055	25.1625	25.9394	31.503	22.5699	21.257
BJN34_04280	Fe(3+) ABC transporter substrate-binding protein	1.10462	6.10817	2.1852	0.139343	0.257214	0.678774	6.10817	0.836129	0.360506	0.633218	0.425848	6.10817	0.33277	0.564033	0.783216	25.0496	26.1441	164.221	93.4377	46.7854	38.4035	30.7401	19.4866	37.724
BJN34_04285	hypothetical protein	-2.87843	6.23975	36.1405	1.84e-09	3.79e-08	1.12021	6.23975	6.56668	0.0103906	0.0633871	-3.99864	6.23975	64.715	8.66e-16	5.45e-14	6.11364	5.92483	21.1516	215.181	160.247	215.924	62.0109	74.1317	80.2706
BJN34_04290	iron ABC transporter permease	-0.73716	4.15952	2.55736	0.109781	0.214543	0.188498	4.15952	0.175679	0.675113	0.854937	-0.925658	4.15952	4.09338	0.0430514	0.185378	3.82418	4.55923	8.80637	14.3202	9.85389	10.8535	9.05511	4.65548	10.5377
BJN34_04295	ABC transporter ATP-binding protein	1.13586	4.45763	1.38337	0.239528	0.384778	0.401986	4.45763	0.176295	0.674577	0.854937	0.733875	4.45763	0.589314	0.442684	0.69632	3.37171	5.79512	56.4279	28.6663	8.45095	7.81511	8.96603	5.63911	11.9029
BJN34_04300	recombination factor protein RarA	-0.797532	6.01029	3.76726	0.0522652	0.120829	-0.204962	6.01029	0.253945	0.614311	0.819969	-0.59257	6.01029	2.09304	0.147972	0.391404	20.3294	19.3259	43.8571	51.1233	50.3221	32.0367	41.9915	36.3189	44.5195
BJN34_04305	serine--tRNA ligase	-1.11521	8.2996	15.2867	9.24e-05	0.000585111	-0.678966	8.2996	5.76842	0.0163167	0.087511	-0.436247	8.2996	2.38037	0.122868	0.352712	120.375	123.516	167.858	201.941	202.744	173.668	246.522	211.463	280.057
BJN34_04315	DUF1653 domain-containing protein	-0.680687	4.58178	6.74704	0.00939035	0.029407	0.0230513	4.58178	0.00836086	0.927145	0.972438	-0.703738	4.58178	7.4351	0.0063964	0.0525369	16.615	17.7119	13.9737	22.5687	26.5922	30.9647	20.7796	18.8515	23.1459
BJN34_04320	phospholipid phosphatase PAP2 superfamily protein	-0.0425558	3.1148	0.00541047	0.941364	0.967331	0.645844	3.1148	1.28433	0.257095	0.530771	-0.688399	3.1148	1.47932	0.223881	0.497835	4.96134	6.64922	3.3549	8.28072	8.64631	7.56795	0.534946	5.29104	6.96134
BJN34_04325	magnesium transporter	0.116279	6.62981	0.175499	0.67527	0.7891	-0.121748	6.62981	0.191714	0.661494	0.848842	0.238027	6.62981	0.737812	0.390363	0.656834	92.189	75.3064	47.8808	65.8599	48.8789	69.6577	38.4503	71.3693	51.1379
BJN34_04330	LysR family transcriptional regulator	-0.800023	4.81819	9.79809	0.00174694	0.00722136	-0.234902	4.81819	0.895877	0.34389	0.617503	-0.565121	4.81819	4.93176	0.0263675	0.134936	23.6351	17.4967	12.7994	27.384	23.86	29.307	24.1194	27.7129	23.5597
BJN34_04335	D-amino acid dehydrogenase small subunit	1.22344	4.42233	4.82416	0.0280635	0.073077	0.0416034	4.42233	0.0055771	0.940469	0.977456	1.18183	4.42233	4.55894	0.0327472	0.15746	32.434	32.8591	5.43101	8.28801	7.78889	14.4965	4.54284	11.0075	8.42407
BJN34_04340	amino acid ABC transporter substrate-binding protein	1.09882	4.34744	6.00601	0.0142572	0.0419358	0.500049	4.34744	1.23699	0.266053	0.541255	0.59877	4.34744	1.87387	0.171033	0.42476	26.3216	42.7766	12.6426	15.9729	20.3586	16.7655	5.78598	16.0345	8.42364
BJN34_04345	cystine ABC transporter substrate-binding protein	0.227988	7.81893	0.420944	0.516466	0.659799	0.277199	7.81893	0.622316	0.430188	0.694862	-0.0492105	7.81893	0.0196937	0.888396	0.954237	246.952	241.576	253.453	221.535	260.539	307.322	76.2156	225.499	231.072
BJN34_04350	ABC transporter permease	-0.219811	4.37066	0.397028	0.528628	0.670388	-0.122616	4.37066	0.124794	0.723893	0.883083	-0.097195	4.37066	0.0786559	0.779127	0.90348	21.0348	22.0463	29.1196	20.7956	31.2759	28.2075	23.353	16.9307	29.2278
BJN34_04355	cyanophycin synthetase	-1.09579	7.67925	19.0659	1.26e-05	0.000104093	-0.637252	7.67925	6.5839	0.0102905	0.0629988	-0.458541	7.67925	3.38478	0.0658008	0.242989	48.511	44.9383	44.8158	72.5218	72.1713	48.7785	70.6295	86.559	84.91
BJN34_04360	cyanophycin synthetase	-0.953205	8.21038	15.6028	7.81e-05	0.000506099	-0.737527	8.21038	9.42658	0.00213863	0.0193137	-0.215678	8.21038	0.808625	0.368527	0.63824	82.8631	82.4502	52.9843	90.473	88.8548	75.5255	115.56	102.012	120.743
BJN34_04365	ABC transporter	-0.531504	7.21854	5.81638	0.0158776	0.045643	-0.18758	7.21854	0.73349	0.391754	0.662072	-0.343924	7.21854	2.44846	0.11764	0.342675	53.9389	47.8286	36.2275	59.9911	58.1636	58.9173	52.5506	48.6785	59.2063
BJN34_04370	DUF1854 domain-containing protein	-0.376566	5.34145	2.26061	0.132702	0.248237	0.213883	5.34145	0.758817	0.383699	0.654851	-0.59045	5.34145	5.71908	0.0167815	0.100557	57.0048	50.9059	57.3	84.345	75.3298	97.5487	49.0425	53.2272	74.7354
BJN34_04375	hypothetical protein	-1.58967	6.00245	21.253	4.02e-06	3.84e-05	-0.754459	6.00245	5.05214	0.0245956	0.11761	-0.835211	6.00245	5.98639	0.0144166	0.0915787	51.036	69.9109	88.4319	119.686	157.018	112.086	203.912	143.807	172.527
BJN34_04380	histidine kinase	1.64756	5.90977	16.9248	3.89e-05	0.000274496	0.316055	5.90977	0.637473	0.424627	0.688553	1.3315	5.90977	11.3891	0.000738755	0.0105904	107.175	117.417	36.6596	41.8717	27.1596	33.829	14.9607	19.8317	31.6
BJN34_04385	DNA-binding response regulator	1.54539	3.73766	17.4349	2.97e-05	0.000216925	0.729995	3.73766	3.70129	0.0543704	0.200032	0.815396	3.73766	5.56268	0.0183473	0.10613	32.0297	30.8799	18.001	20.7552	9.46155	16.1565	5.81601	7.15853	8.8333
BJN34_04390	N-acyl-D-amino-acid deacylase	0.499299	1.75226	0.852625	0.355811	0.507966	0.0680325	1.75226	0.0148391	0.903045	0.963935	0.431267	1.75226	0.687207	0.407116	0.670723	1.73208	2.91201	1.90968	1.46894	1.30401	2.12394	0.383903	1.39388	2.20922
BJN34_04395	DUF1097 domain-containing protein	-1.11726	1.17399	0.869088	0.351208	0.503366	-1.70517	1.17399	1.93088	0.164662	0.407939	0.58791	1.17399	0.228603	0.632562	0.823521	0.505992	1.91642	3.25415	4.2259	0	0	4.90748	0.950171	5.16172
BJN34_04400	gamma-glutamyltransferase	0.343677	2.7906	0.598832	0.439024	0.587413	-0.144428	2.7906	0.100934	0.750712	0.893132	0.488106	2.7906	1.23549	0.266342	0.543196	3.72945	3.76315	3.77249	4.24926	2.2949	1.51613	1.60464	2.03037	3.62102
BJN34_04405	TetR family transcriptional regulator	0.845441	5.32862	9.41939	0.00214703	0.00857849	0.878613	5.32862	10.2037	0.00140162	0.0139037	-0.0331717	5.32862	0.0157092	0.900257	0.958227	56.0606	57.7652	54.8408	64.6917	60.3324	51.7075	21.4526	19.8929	35.1212
BJN34_04410	MFS transporter	2.544	5.22317	72.0772	2.07e-17	1.09e-15	2.35493	5.22317	61.7675	3.86e-15	2.88e-13	0.189075	5.22317	0.532032	0.465754	0.712366	33.2208	35.6341	36.3877	35.6417	27.8115	31.5397	3.22031	4.26868	7.11471
BJN34_04415	DUF1254 domain-containing protein	2.64268	5.19115	60.4206	7.66e-15	3.36e-13	1.56092	5.19115	21.2264	4.08e-06	0.000102013	1.08175	5.19115	12.2637	0.000461855	0.00740251	58.3369	44.8952	29.4368	22.3119	17.5731	23.0596	2.64047	7.49127	6.91788
BJN34_04420	hypothetical protein	1.31912	5.21487	13.525	0.000235412	0.00131983	-1.47278	5.21487	15.0358	0.00010549	0.00174323	2.7919	5.21487	52.9419	3.44e-13	1.76e-11	385.708	325.636	151.193	45.0154	25.6009	53.5155	60.5469	109.066	107.302
BJN34_04430	phosphoglycolate phosphatase	0.685935	6.9183	10.5846	0.00114034	0.00507707	0.284188	6.9183	1.81183	0.178289	0.429269	0.401747	6.9183	3.72136	0.0537205	0.21358	224.387	208.163	161.611	146.379	150.402	159.089	89.8977	110.586	98.0827
BJN34_04435	bifunctional 3-demethylubiquinol 3-O-methyltransferase/2-polyprenyl-6-hydroxyphenol methylase	0.362825	8.16263	3.00068	0.0832296	0.173912	0.0459929	8.16263	0.0481951	0.826234	0.928709	0.316832	8.16263	2.30054	0.129329	0.362393	393.503	399.648	356.248	311.245	281.142	352.997	201.528	259.014	271.629
BJN34_04440	DDE transposase	-0.535597	6.29842	3.65777	0.0558083	0.127404	-0.300506	6.29842	1.16381	0.280678	0.556995	-0.235091	6.29842	0.707876	0.40015	0.664581	39.6232	40.8924	46.7548	49.4287	53.5457	51.0996	60.9657	42.1682	46.3674
BJN34_04445	OmpA family protein	-0.735847	12.7766	9.35971	0.00221807	0.00880616	-0.74478	12.7766	9.58603	0.00196064	0.0182221	0.00893216	12.7766	0.0013937	0.97022	0.989183	7627.67	8162.94	7279.97	7277.51	8651.9	7422.94	8573.27	12485.2	10484.4
BJN34_04450	DNA gyrase subunit A	-1.43865	9.79888	26.8515	2.2e-07	2.81e-06	-0.736136	9.79888	7.24816	0.00709737	0.0480374	-0.702518	9.79888	6.58759	0.0102692	0.0738755	163.997	139.382	178.781	277.795	287.794	242.391	389.775	303.632	374.311
BJN34_04455	DUF2059 domain-containing protein	-1.20765	9.89558	25.0189	5.68e-07	6.7e-06	-0.551386	9.89558	5.34224	0.0208147	0.105352	-0.656262	9.89558	7.52772	0.00607566	0.0503807	927.243	1046.47	763.553	1279.11	1656.2	1426.48	1706.66	1709.42	1687.43
BJN34_04460	phosphoserine transaminase	-0.798705	8.30581	9.83653	0.0017108	0.00711874	-0.506155	8.30581	3.98982	0.045776	0.17907	-0.292549	8.30581	1.33148	0.248542	0.525307	165.649	162.019	205.851	210.848	249.684	213.918	232.976	267.502	267.766
BJN34_04465	chorismate mutase	-0.594041	7.89625	6.55937	0.0104333	0.0320926	-0.360131	7.89625	2.42921	0.119093	0.336098	-0.23391	7.89625	1.02191	0.312067	0.58944	129.031	155.465	153.473	178.943	174.095	177.286	146.242	212.777	187.87
BJN34_04470	histidinol-phosphate transaminase	-0.195592	7.63226	0.660407	0.416416	0.567126	-0.211475	7.63226	0.772395	0.379477	0.650513	0.0158834	7.63226	0.00436364	0.947332	0.981822	152.942	133.296	151.033	150.982	143.601	150.322	99.2887	172.267	143.849
BJN34_04475	prephenate dehydrogenase	-0.307757	6.853	2.07833	0.149404	0.271372	-0.118365	6.853	0.309947	0.577713	0.796296	-0.189393	6.853	0.792233	0.373426	0.642226	93.3189	108.551	96.021	120.162	113.082	114.465	91.3745	107.539	102.688
BJN34_04480	3-phosphoshikimate 1-carboxyvinyltransferase	-0.197778	7.95947	0.742273	0.388934	0.542939	-0.176019	7.95947	0.588586	0.442967	0.705729	-0.0217592	7.95947	0.00900528	0.924397	0.971418	153.325	150.67	161.97	158.259	147.28	182.056	112.322	159.777	170.106
BJN34_04485	DUF2061 domain-containing protein	1.7945	1.88956	3.21155	0.0731203	0.156795	0.237558	1.88956	0.0551051	0.814407	0.922302	1.55694	1.88956	2.52781	0.111855	0.331684	10.3423	5.14473	43.1726	5.87296	6.77707	6.85018	0	11.9783	2.66072
BJN34_04490	cytidylate kinase	-1.26851	8.20169	19.2091	1.17e-05	9.81e-05	-0.661959	8.20169	5.37035	0.0204819	0.104124	-0.606551	8.20169	4.4834	0.0342255	0.162202	187.752	217.854	281.818	377.945	384.602	324.925	474.648	405.01	489.488
BJN34_04495	30S ribosomal protein S1	-1.88094	12.0685	26.0039	3.41e-07	4.21e-06	-1.1943	12.0685	10.8934	0.000965068	0.0104245	-0.686644	12.0685	3.66545	0.0555518	0.217311	742.459	834.923	1485.96	1555.27	2057.16	1563.49	2673.52	3318.81	3564.41
BJN34_04500	integration host factor subunit beta	-1.81539	9.27488	23.4285	1.3e-06	1.4e-05	-1.22685	9.27488	11.066	0.00087927	0.00970984	-0.588538	9.27488	2.59457	0.107231	0.325357	502.401	438.186	921.837	975.666	1075.27	900.586	1330.22	2269.52	1997.67
BJN34_04505	DUF1049 domain-containing protein	-0.740532	5.5312	4.75458	0.0292205	0.0755878	-0.101591	5.5312	0.0921062	0.761516	0.898064	-0.638941	5.5312	3.56926	0.0588585	0.22491	79.0106	87.176	78.4907	138.326	106.94	147.978	147.095	65.0446	116.141
BJN34_04510	lipopolysaccharide assembly protein LapB	-0.891272	6.88785	11.8407	0.000579514	0.00286816	-0.42413	6.88785	2.73893	0.0979303	0.296359	-0.467142	6.88785	3.27819	0.0702063	0.25374	57.2234	60.0565	60.283	94.9951	70.5131	87.915	96.7531	70.7695	100.435
BJN34_04515	UDP-glucose 6-dehydrogenase	-0.444954	8.08087	3.95111	0.0468405	0.11088	-0.191294	8.08087	0.734986	0.391272	0.661986	-0.25366	8.08087	1.28899	0.256234	0.533101	147.442	141.039	144.922	189.343	172.925	167.7	166.232	160.638	153.403
BJN34_04520	D-glycero-beta-D-manno-heptose-7-phosphate kinase	-0.367494	7.80558	2.72453	0.0988173	0.198356	-0.227195	7.80558	1.04569	0.306503	0.583115	-0.140298	7.80558	0.398381	0.527926	0.756334	185.574	178.497	180.062	194.726	222.36	195.401	164.392	193.361	218.434
BJN34_04525	ADP-glyceromanno-heptose 6-epimerase	-0.306113	7.73438	2.11611	0.145756	0.266495	-0.183445	7.73438	0.762875	0.38243	0.653492	-0.122668	7.73438	0.340964	0.559273	0.779066	179.242	173.724	152.393	190.1	181.633	189.633	135.315	201.385	175.214
BJN34_04530	competence protein ComE	0.100621	5.46385	0.196003	0.657966	0.777433	-0.0942283	5.46385	0.170299	0.679846	0.856644	0.194849	5.46385	0.746746	0.387508	0.65508	136.178	125.846	83.638	110.096	87.6282	108.187	81.6856	93.4918	83.9782
BJN34_04535	pyrimidine utilization transport protein G	-1.29991	6.62183	27.497	1.57e-07	2.07e-06	-0.727512	6.62183	8.93354	0.00279981	0.0237572	-0.572396	6.62183	5.39092	0.0202418	0.113394	41.5392	42.7198	35.6643	58.9574	65.9465	56.3909	84.1796	65.5994	89.0494
BJN34_04540	cysteine synthase B	-0.27649	8.03918	1.73051	0.188346	0.321388	-0.222155	8.03918	1.11935	0.290058	0.565119	-0.0543344	8.03918	0.0670047	0.795749	0.912461	231.589	244.862	226.089	258.73	231.42	257.486	219.673	221.037	253.28
BJN34_04545	O-antigen ligase family protein	-0.118315	7.15683	0.20027	0.654503	0.774134	0.0422484	7.15683	0.0256229	0.872825	0.951759	-0.160564	7.15683	0.370864	0.542534	0.767259	91.7201	87.2917	94.0629	108.398	101.578	103.655	92.7991	61.2182	86.2732
BJN34_04550	glycosyl transferase	-0.439825	7.26322	4.18744	0.0407245	0.099113	-0.0454895	7.26322	0.0453677	0.831329	0.931277	-0.394336	7.26322	3.38657	0.0657297	0.242953	102.851	103.954	102.236	155.436	129.068	132.97	101.386	118.886	123.691
BJN34_04555	UDP-glucose--(glucosyl) LPS alpha 1,3-glucosyltransferase WaaO	-0.400904	7.02462	2.27292	0.131652	0.247034	-0.175306	7.02462	0.437659	0.508255	0.755306	-0.225598	7.02462	0.722887	0.395198	0.660058	94.9248	87.6159	105.765	113.38	119.489	114.678	116.775	84.8155	108.863
BJN34_04560	glycosyl transferase	-0.928838	7.01433	12.2697	0.000460378	0.00236651	-0.406998	7.01433	2.40945	0.120605	0.338678	-0.52184	7.01433	3.90636	0.0481037	0.199422	63.989	69.8619	74.2299	111.192	106.069	90.2373	117.443	89.3893	116.466
BJN34_04565	lytic murein transglycosylase B	-0.389332	7.57251	3.53613	0.0600455	0.134478	-0.203894	7.57251	0.97595	0.323201	0.597874	-0.185439	7.57251	0.805549	0.36944	0.63918	137.408	137.505	116.948	153.601	141.354	160.46	137.927	132.269	145.93
BJN34_04570	deacetylase	0.0845097	8.13421	0.155735	0.693114	0.80226	0.0786997	8.13421	0.135141	0.71316	0.87724	0.00580993	8.13421	0.000739724	0.978302	0.99333	276.109	259.569	272.759	300.013	246.905	281.589	187.087	211.566	226.396
BJN34_04575	enoyl-CoA hydratase	0.792157	7.46408	8.78525	0.00303676	0.0114675	0.345916	7.46408	1.68354	0.194455	0.451512	0.446241	7.46408	2.83539	0.0922086	0.296403	252.314	266.25	227.448	223.611	152.62	184.659	82.497	164.377	107.596
BJN34_04580	phosphate ABC transporter ATP-binding protein	-0.943708	6.27433	6.49924	0.0107921	0.0330785	-0.176509	6.27433	0.233806	0.628716	0.82824	-0.767199	6.27433	4.32578	0.0375392	0.172362	30.2398	38.4684	54.2113	82.2641	79.4965	56.7676	82.2806	48.5197	63.7692
BJN34_04585	DL-methionine transporter permease subunit	-1.59312	5.61547	28.6142	8.83e-08	1.23e-06	-1.00821	5.61547	12.045	0.000519313	0.00635287	-0.584918	5.61547	3.87942	0.0488815	0.201582	36.5115	29.0789	38.9129	53.9097	64.3617	42.2187	82.3659	74.5961	102.771
BJN34_04590	metal ABC transporter substrate-binding protein	-1.44301	6.86551	27.0001	2.03e-07	2.61e-06	-0.978536	6.86551	12.788	0.000348851	0.0045921	-0.464473	6.86551	2.85326	0.0911886	0.294629	88.0209	55.4991	79.1145	91.6005	122.996	99.5259	155.811	169.641	171.982
BJN34_04595	electron transporter RnfB	-0.951288	10.238	12.2143	0.000474252	0.00242232	-0.381615	10.238	1.99698	0.157613	0.398761	-0.569673	10.238	4.42879	0.0353376	0.165996	963.502	878.197	1004.97	1194.06	1587.55	1555.4	1084.12	1895.3	1594.9
BJN34_04600	electron transfer flavoprotein subunit alpha	-0.670937	10.2656	5.8996	0.0151443	0.0439476	-0.281315	10.2656	1.04549	0.306548	0.583115	-0.389621	10.2656	2.00117	0.157177	0.403685	988.784	801.742	856.696	981.902	1299.43	1257.08	791.312	1527.34	1169.26
BJN34_04605	acyl-CoA dehydrogenase	-0.190354	8.81052	0.459508	0.497854	0.643724	0.0685756	8.81052	0.0597471	0.806896	0.919511	-0.25893	8.81052	0.851022	0.356263	0.630081	239.079	185.438	170.865	205.877	243.781	274.033	115.682	251.376	192.763
BJN34_04610	D-amino acid dehydrogenase small subunit	-0.511161	7.89059	2.28542	0.130595	0.245383	-0.358227	7.89059	1.12657	0.288509	0.56478	-0.152934	7.89059	0.205445	0.650361	0.834698	179.593	121.917	106.423	148.128	156.423	153.028	107.787	256.903	110.449
BJN34_04615	AsnC family transcriptional regulator	-0.444619	5.05118	2.26211	0.132573	0.248136	-0.428843	5.05118	2.11218	0.146131	0.381383	-0.0157757	5.05118	0.00283883	0.957508	0.985209	48.0321	65.1754	38.5842	44.1451	46.3452	64.9352	51.5809	72.5519	42.6923
BJN34_04620	hypothetical protein	-0.255111	3.83871	0.679236	0.40985	0.562052	-0.547784	3.83871	3.04406	0.0810331	0.261695	0.292673	3.83871	0.872187	0.350351	0.624087	34.2162	32.8027	18.598	20.8261	18.1678	30.7853	25.4459	27.0707	29.6706
BJN34_04625	site-specific recombinase	-0.280078	3.60261	0.542396	0.461441	0.608691	0.062921	3.60261	0.0283288	0.866338	0.948656	-0.342999	3.60261	0.841807	0.35888	0.631323	6.09894	8.86154	3.99455	10.3708	4.95488	9.39248	5.90249	5.3468	7.38663
BJN34_04630	hypothetical protein	0.434608	3.73328	1.6005	0.205833	0.343005	0.176097	3.73328	0.257931	0.611545	0.818332	0.258511	3.73328	0.598246	0.439248	0.69395	7.79512	12.5194	5.92623	6.92866	6.63066	8.61384	3.69804	6.61769	5.2039
BJN34_04635	transposase	0.235088	2.1558	0.244559	0.620933	0.747841	-0.278291	2.1558	0.318183	0.572702	0.79403	0.513379	2.1558	1.17956	0.277446	0.555374	3.37816	4.38825	1.71732	2.55034	1.68447	2.33924	2.88672	2.16284	1.24955
BJN34_04640	hypothetical protein	0.510143	4.92966	3.76119	0.0524553	0.121229	0.243311	4.92966	0.844749	0.358042	0.631344	0.266832	4.92966	1.07879	0.298969	0.575816	16.9225	17.6334	10.4504	13.6517	10.9112	13.1647	6.85961	10.8723	7.69066
BJN34_04645	hypothetical protein	0.549022	3.2649	1.73041	0.188358	0.321388	0.263251	3.2649	0.390324	0.532129	0.770325	0.28577	3.2649	0.499127	0.479884	0.720884	18.681	24.376	14.525	19.0762	13.7682	14.9131	8.13414	17.7849	5.72514
BJN34_04650	hypothetical protein	0.082129	4.71779	0.0636773	0.800775	0.877414	0.0191444	4.71779	0.00345677	0.953116	0.981446	0.0629846	4.71779	0.0381573	0.845128	0.938067	32.7556	45.1336	29.0591	40.809	26.7333	37.0447	16.1381	39.6334	27.3875
BJN34_04655	hypothetical protein	0.684249	8.19115	5.54721	0.0185102	0.0520571	0.426972	8.19115	2.16914	0.140805	0.371121	0.257277	8.19115	0.794261	0.372815	0.641493	233.048	264.71	147.285	188.114	153.384	203.322	68.4041	151.906	106.731
BJN34_04660	hypothetical protein	0.435521	8.2213	2.42608	0.119331	0.228372	0.251646	8.2213	0.81127	0.367745	0.639553	0.183875	8.2213	0.435459	0.509322	0.742431	367.451	373.432	223.757	281.835	234.805	342.015	148.692	268.821	159.661
BJN34_04665	DUF4238 domain-containing protein	0.0325417	3.51228	0.00494485	0.943939	0.967916	-0.759523	3.51228	2.55283	0.110097	0.319626	0.792065	3.51228	2.82799	0.092634	0.297356	14.3938	18.4221	6.80322	5.31048	5.42592	11.9574	13.2358	6.64351	10.2513
BJN34_04670	hypothetical protein	0.139173	2.84967	0.0960041	0.756679	0.847278	-0.223794	2.84967	0.240154	0.624095	0.826436	0.362967	2.84967	0.661305	0.4161	0.679672	33.7604	41.7539	19.1847	31.7658	10.8639	33.1068	21.0923	20.0261	28.3302
BJN34_04675	hypothetical protein	-0.00588582	5.25767	0.000417972	0.983689	0.9907	0.0879876	5.25767	0.094118	0.759006	0.896819	-0.0938734	5.25767	0.108708	0.74162	0.884731	22.6867	24.1637	17.0928	23.5453	21.2428	24.6179	21.7673	12.3042	16.8704
BJN34_04680	hypothetical protein	-0.120896	1.90135	0.0680016	0.794269	0.872524	-0.164488	1.90135	0.126009	0.722606	0.881919	0.0435923	1.90135	0.00918469	0.92365	0.970978	2.80192	1.60352	1.09868	2.30908	1.73531	1.33959	1.35843	1.82987	1.88917
BJN34_04685	hypothetical protein	-0.37314	7.99391	2.48927	0.114625	0.220928	-0.336602	7.99391	2.02853	0.154369	0.393685	-0.0365384	7.99391	0.0239273	0.87707	0.951258	69.4363	66.8028	57.4667	62.0953	70.8004	69.126	76.6261	63.7556	61.433
BJN34_04690	XRE family transcriptional regulator	-0.102179	5.32491	0.211577	0.645534	0.767195	0.14491	5.32491	0.43487	0.509609	0.755745	-0.247089	5.32491	1.28229	0.257474	0.533438	109.002	92.8704	75.509	126.223	101.839	106.813	73.9788	85.2176	82.3926
BJN34_04700	helicase SNF2	1.1002	5.28229	16.4341	5.04e-05	0.0003438	0.810842	5.28229	8.87574	0.00288985	0.0243126	0.289358	5.28229	1.24253	0.264984	0.541761	17.7153	19.017	10.117	11.4015	13.6424	13.4003	5.82337	6.18854	5.30226
BJN34_04705	type II restriction endonuclease	1.7489	2.83453	9.83794	0.00170949	0.00711757	1.26922	2.83453	5.0824	0.0241699	0.116687	0.479684	2.83453	0.893402	0.344557	0.619355	20.2102	12.0071	6.03935	7.44552	7.91614	11.9636	0.520946	3.78298	4.61679
BJN34_04710	hypothetical protein	0.544697	2.63843	1.16225	0.281	0.430547	0.168327	2.63843	0.107748	0.742722	0.889257	0.376371	2.63843	0.588775	0.442893	0.69632	10.7602	10.7248	2.89417	4.36907	5.83855	8.24971	5.12149	4.80388	3.16342
BJN34_04715	hypothetical protein	-0.535289	0.926805	0.509715	0.475262	0.622534	0.294316	0.926805	0.184907	0.66719	0.851544	-0.829605	0.926805	1.39205	0.238059	0.513976	0.958437	1.17546	1.73288	3.11982	0.741205	3.3023	2.04712	1.78779	0.92437
BJN34_04720	hypothetical protein	1.09911	1.62408	2.43346	0.118771	0.227677	0.35492	1.62408	0.236998	0.626383	0.82737	0.744187	1.62408	1.22934	0.267535	0.544506	16.6299	5.02611	6.54384	8.01739	3.88882	4.12019	0.321103	7.13609	1.78567
BJN34_04725	hypothetical protein	-0.235987	2.35131	0.0844117	0.771406	0.858302	0.152192	2.35131	0.0358125	0.849903	0.940331	-0.388179	2.35131	0.233418	0.629001	0.822246	0.900185	11.7817	5.36538	4.84675	7.2874	11.895	6.76142	8.63108	1.13682
BJN34_04730	hypothetical protein	0.0958601	2.5284	0.0293281	0.864024	0.917531	-0.414386	2.5284	0.525855	0.468355	0.725803	0.510246	2.5284	0.823366	0.364198	0.635449	7.33063	7.11181	2.61477	1.15592	5.32769	5.4069	3.57962	3.61823	5.43256
BJN34_04735	putative transcriptional regulator	0.293296	7.88289	1.7957	0.180233	0.311478	0.338588	7.88289	2.39466	0.12175	0.340056	-0.0452922	7.88289	0.0432922	0.835176	0.932553	470.677	536.17	384.084	492.535	396.199	577.119	287.845	313.713	317.313
BJN34_04740	DNA repair photolyase	0.304151	5.72097	1.21375	0.270592	0.419332	0.0706755	5.72097	0.0651983	0.798461	0.91517	0.233475	5.72097	0.727374	0.393736	0.659305	58.3924	50.5876	35.3891	35.6064	44.7046	43.0964	34.1433	35.7925	23.1182
BJN34_04750	TM2 domain-containing protein	-0.208097	5.12198	0.496563	0.481014	0.627694	0.168629	5.12198	0.33299	0.563904	0.788941	-0.376726	5.12198	1.66607	0.196785	0.459541	53.7102	53.5832	50.0064	85.6521	55.9229	68.8045	50.513	33.9815	63.1732
BJN34_04755	hypothetical protein	2.01189	4.01505	29.9198	4.5e-08	6.75e-07	2.13828	4.01505	34.1129	5.2e-09	2.26e-07	-0.126394	4.01505	0.161726	0.687573	0.855943	130.517	112.468	90.9457	86.2195	133.647	148.925	15.2792	20.4751	29.4934
BJN34_04760	hypothetical protein	0.370562	5.50682	0.704721	0.401202	0.554033	-1.34077	5.50682	8.69901	0.00318383	0.0265281	1.71134	5.50682	14.0512	0.000177896	0.00332905	224.281	168.807	53.0288	41.5734	36.9537	54.7505	118.095	77.2921	68.9656
BJN34_04765	sorbosone dehydrogenase	0.457125	5.08276	2.49659	0.114093	0.220112	0.17921	5.08276	0.380351	0.537416	0.77387	0.277915	5.08276	0.95258	0.329064	0.60414	40.6805	28.785	22.5859	21.7206	20.3984	34.6472	14.9916	17.8735	21.1802
BJN34_04770	30S ribosomal protein S16	-2.16349	8.40585	21.4402	3.65e-06	3.53e-05	-1.12755	8.40585	6.20118	0.0127665	0.0736013	-1.03594	8.40585	5.22679	0.0222416	0.120785	354.561	329.46	660.188	1149.72	1006.74	751.4	2373.95	984.772	1592.7
BJN34_04775	ribosome maturation factor RimM	-2.42418	8.72154	21.2292	4.08e-06	3.89e-05	-1.06855	8.72154	4.48779	0.0341377	0.147695	-1.35563	8.72154	7.10173	0.00770096	0.0598439	139.968	128.931	258.314	552.544	552.361	312.722	1196.47	399.861	717.635
BJN34_04780	tRNA (guanosine(37)-N1)-methyltransferase TrmD	-2.72644	9.21492	36.6251	1.43e-09	3.03e-08	-1.52157	9.21492	12.4384	0.000420589	0.00541293	-1.20488	9.21492	7.88577	0.00498253	0.0440601	155.442	141.392	284.559	527.342	535.081	345.81	1450.14	805.812	916.696
BJN34_04785	50S ribosomal protein L19	-3.06819	10.1281	42.0492	8.9e-11	2.33e-09	-1.91459	10.1281	17.9286	2.29e-05	0.000472619	-1.1536	10.1281	6.7676	0.00928278	0.0680321	525.099	386.851	949.228	1643.79	1599.53	1128.01	5887.35	3509.85	3520.05
BJN34_04790	coenzyme A pyrophosphatase	-0.284208	6.17262	1.51563	0.218283	0.358829	-0.0195949	6.17262	0.00730338	0.931896	0.973513	-0.264613	6.17262	1.32951	0.248892	0.525396	82.9276	78.7513	79.1262	91.3956	82.8346	123.529	72.143	80.0551	87.2934
BJN34_04795	sulfurtransferase	-2.13325	6.63483	71.9926	2.16e-17	1.12e-15	-1.39092	6.63483	32.6815	1.09e-08	4.58e-07	-0.742334	6.63483	8.97529	0.00273656	0.0281963	40.5218	49.8307	39.2898	83.6699	69.2548	68.7953	166.111	135.64	159.189
BJN34_04800	group II intron reverse transcriptase/maturase	-2.2103	10.8962	23.5822	1.2e-06	1.32e-05	-1.45544	10.8962	10.7322	0.00105285	0.0111528	-0.754859	10.8962	2.96949	0.0848487	0.282937	249.99	324.514	585.673	741.972	682.506	651.641	2003.04	912.605	1529.09
BJN34_04805	DNA polymerase III subunit alpha	-0.205847	9.12898	0.917201	0.338211	0.490743	-0.127403	9.12898	0.351789	0.553102	0.78155	-0.0784449	9.12898	0.133443	0.714888	0.870023	136.913	126.933	125.599	139.398	135.773	145.883	117.598	117.903	130.503
BJN34_04810	lipid A export permease/ATP-binding protein MsbA	-1.61229	6.74613	15.489	8.3e-05	0.000534003	-1.02019	6.74613	6.41733	0.0113012	0.0673717	-0.592098	6.74613	2.16065	0.141585	0.379438	22.8697	26.1543	34.0888	54.0728	41.6807	34.8705	98.2394	40.0449	67.7393
BJN34_04815	alkylhydroperoxidase	0.355058	6.31847	1.97011	0.160436	0.285422	0.382008	6.31847	2.28428	0.130691	0.354864	-0.0269499	6.31847	0.0116258	0.914136	0.965743	122.504	154.487	101.731	136.443	119.96	135.8	62.7314	108.627	70.0656
BJN34_04820	hypothetical protein	1.93128	2.78451	12.2281	0.000470751	0.00241086	-0.0636379	2.78451	0.0116578	0.914018	0.969093	1.99492	2.78451	13.4537	0.000244523	0.00435556	26.6816	31.6241	7.02094	5.34093	4.90564	4.86356	3.4299	6.13623	2.64852
BJN34_04825	hypothetical protein	0.0573009	4.54815	0.0228539	0.879837	0.927174	-0.638398	4.54815	2.7399	0.0978706	0.296359	0.695699	4.54815	3.29937	0.0693067	0.251114	104.611	82.886	40.7385	54.0086	41.157	45.7183	77.1296	39.3147	54.8379
BJN34_04830	ribonuclease E/G	-0.0684642	8.18659	0.106145	0.744577	0.839259	-0.289944	8.18659	1.89742	0.168367	0.413689	0.22148	8.18659	1.11041	0.291994	0.56871	200.497	179.295	158.604	151.083	146.706	172.879	150.363	162.227	144.671
BJN34_04835	septum formation inhibitor Maf	-0.281827	4.97524	1.02554	0.311209	0.4635	-0.613518	4.97524	4.75913	0.0291432	0.132407	0.33169	4.97524	1.39508	0.237549	0.513276	46.1198	48.4497	36.7026	40.7096	33.7246	31.2488	52.5958	35.5371	39.717
BJN34_04840	23S rRNA (pseudouridine(1915)-N(3))-methyltransferase RlmH	-0.418303	4.66694	1.46176	0.22665	0.368861	-0.423273	4.66694	1.50031	0.220624	0.486496	0.0049699	4.66694	0.000205976	0.988549	0.997772	47.1052	36.8502	37.3399	46.5358	42.765	33.6609	60.5766	32.6271	36.2749
BJN34_04845	ribosome silencing factor	-0.631854	7.69259	6.39371	0.0114525	0.0347948	-0.541961	7.69259	4.7211	0.0297947	0.134572	-0.0898926	7.69259	0.130018	0.718414	0.87117	203.779	228.301	172.245	199.006	213.63	241.56	294.52	212.644	243.249
BJN34_04850	nicotinate-nucleotide adenylyltransferase	-0.257957	6.71385	0.848474	0.356985	0.509006	-0.188274	6.71385	0.453263	0.500789	0.749722	-0.0696822	6.71385	0.0621495	0.80313	0.916325	115.56	117.242	109.091	117.755	120.939	128.963	130.67	75.5498	123.282
BJN34_04855	coproporphyrinogen III oxidase	-0.307637	7.2611	1.23267	0.266888	0.415173	-0.310504	7.2611	1.25674	0.262268	0.537041	0.00286666	7.2611	0.000107239	0.991738	0.99856	129.177	123.685	149.687	119.951	147.59	146.674	156.264	112.283	137.567
BJN34_04860	phosphoribosylamine--glycine ligase	-1.29635	7.77998	19.1217	1.23e-05	0.000101821	-0.727575	7.77998	6.18563	0.0128792	0.0738648	-0.568773	7.77998	3.76036	0.0524814	0.211514	83.2781	85.1633	102.985	143.045	154.191	117.77	217.114	153.386	172.846
BJN34_04865	YebC/PmpR family DNA-binding transcriptional regulator	-1.73529	8.22294	31.1761	2.36e-08	3.81e-07	-0.869126	8.22294	8.19271	0.00420591	0.0329432	-0.866159	8.22294	8.06141	0.0045218	0.0408531	149.756	171.811	196.974	300.555	354.718	320.504	587.105	373.268	442.496
BJN34_04870	ATP-binding protein	-0.0521709	7.71387	0.0553744	0.813962	0.886283	-0.140133	7.71387	0.39924	0.527482	0.767448	0.0879622	7.71387	0.157817	0.691175	0.857276	130.031	117.19	115.961	110.541	111.192	128.103	78.6795	108.458	122.648
BJN34_04875	uracil phosphoribosyltransferase	-0.706499	5.93352	7.98262	0.00472285	0.0166164	-0.373203	5.93352	2.27494	0.13148	0.356098	-0.333296	5.93352	1.78276	0.181811	0.440286	59.1628	72.7535	56.1929	74.0155	85.1993	81.8177	88.5963	68.0583	91.6134
BJN34_04880	MFS transporter	-0.945802	3.21632	2.47641	0.115565	0.222333	-0.179466	3.21632	0.093857	0.75933	0.896895	-0.766336	3.21632	1.64512	0.199624	0.46364	5.07619	2.45085	2.75349	5.87547	4.1176	8.32215	9.32578	1.79671	4.6474
BJN34_04885	alcohol dehydrogenase	1.51112	4.55728	14.7676	0.000121607	0.000735379	0.732971	4.55728	3.45226	0.0631654	0.221784	0.778144	4.55728	4.24937	0.0392649	0.177345	12.9083	10.2814	9.2432	10.1655	5.17285	3.87533	1.89021	3.85965	3.46983
BJN34_04890	(2Fe-2S)-binding protein	0.802445	3.40908	3.34263	0.0675066	0.147403	0.3325	3.40908	0.560375	0.454109	0.714785	0.469946	3.40908	1.22313	0.268748	0.545767	16.7395	26.8577	23.7751	24.8079	13.0516	12.2923	12.7765	6.2636	11.697
BJN34_04895	6-hydroxynicotinate 3-monooxygenase	-0.10302	3.86256	0.0542785	0.815779	0.887842	0.676628	3.86256	2.42989	0.119042	0.336098	-0.779648	3.86256	3.25524	0.0711956	0.255154	8.73739	8.86343	6.87256	16.6203	13.9081	12.9139	2.57965	6.39596	12.9311
BJN34_04900	Asp/Glu racemase	0.00671553	3.27674	0.000211084	0.988408	0.993546	0.999165	3.27674	5.07197	0.0243157	0.116756	-0.992449	3.27674	5.1443	0.0233228	0.124316	5.87306	7.91945	8.40595	21.3812	13.6291	11.6998	2.88221	5.86866	9.93437
BJN34_04905	alpha/beta hydrolase	-0.376665	3.16275	0.59111	0.44199	0.589507	1.13797	3.16275	6.07101	0.0137418	0.0776841	-1.51464	3.16275	10.559	0.00115625	0.0148808	3.97236	4.17812	6.15781	22.8261	9.00833	12.5131	6.1791	3.61037	5.93034
BJN34_04910	2,5-dihydroxypyridine 5,6-dioxygenase	-0.280837	3.74427	0.106296	0.744401	0.839259	1.27141	3.74427	2.17091	0.140643	0.370975	-1.55224	3.74427	3.19544	0.0738441	0.261265	0	10.1098	7.30061	20.7609	17.3317	15.616	5.49491	3.63851	8.22811
BJN34_04915	N-carbamoylsarcosine amidase	0.207047	2.75338	0.151142	0.697447	0.804804	1.27911	2.75338	6.25301	0.0123982	0.0721389	-1.07206	2.75338	4.69327	0.0302809	0.149016	8.03189	9.88134	1.25984	14.9594	11.0222	14.3457	5.37783	3.91003	3.71681
BJN34_04920	TetR family transcriptional regulator	0.105409	6.58071	0.228182	0.632875	0.758123	-0.109882	6.58071	0.246795	0.619341	0.824201	0.215291	6.58071	0.958238	0.327631	0.602049	125.924	112.531	110.278	97.8719	88.5679	121.942	71.7061	99.714	94.5712
BJN34_04925	aldehyde dehydrogenase	-0.345722	6.05052	0.810313	0.368028	0.520471	-0.0125051	6.05052	0.00106873	0.973921	0.988833	-0.333217	6.05052	0.756174	0.384528	0.652757	23.5377	19.6589	20.6736	28.7327	20.4126	34.0644	18.2066	37.0447	11.5401
BJN34_04930	hypothetical protein	0.400547	4.3296	1.52621	0.216683	0.356877	0.339778	4.3296	1.09736	0.294846	0.569936	0.0607683	4.3296	0.0370855	0.847291	0.939264	73.9876	94.3578	43.9128	70.9584	48.8482	85.2651	32.5994	45.002	51.5388
BJN34_04935	MarR family transcriptional regulator	0.00765333	5.72499	0.0010771	0.973819	0.984929	0.126051	5.72499	0.294815	0.587151	0.802612	-0.118398	5.72499	0.264115	0.607307	0.807411	93.2155	88.6486	96.0383	89.956	100.406	119.644	65.4679	76.6324	84.9082
BJN34_04940	multidrug DMT transporter permease	0.574811	5.44938	2.84773	0.0915028	0.186572	0.00819565	5.44938	0.000574147	0.980883	0.990256	0.566615	5.44938	2.80079	0.0942179	0.30049	41.7122	51.6456	59.7573	35.7167	41.1351	29.5599	35.8459	27.4624	20.1605
BJN34_04945	3-oxoacyl-ACP reductase	0.499109	6.65657	4.84872	0.0276667	0.0722338	-0.2286	6.65657	1.00186	0.316862	0.591521	0.727709	6.65657	10.2963	0.00133294	0.0165103	155.729	128.557	146.185	86.1828	93.2723	86.7245	75.0107	82.4922	91.8089
BJN34_04950	methylglyoxal synthase	0.745064	5.6999	7.81579	0.00517917	0.0179213	-0.252678	5.6999	0.872948	0.350141	0.624393	0.997741	5.6999	13.9864	0.000184141	0.00342739	155.407	137.243	190.277	75.4787	86.7693	87.8686	73.3377	75.8307	88.2345
BJN34_04955	quinone oxidoreductase	1.1136	7.57119	15.6788	7.51e-05	0.000488464	0.099155	7.57119	0.125959	0.722659	0.881919	1.01444	7.57119	13.1294	0.000290696	0.00503195	271.777	262.067	244.79	120.457	121.297	152.946	56.3759	128.541	113.828
BJN34_04960	DUF1232 domain-containing protein	1.64451	5.53034	15.5304	8.12e-05	0.000524407	1.59122	5.53034	14.5694	0.000135088	0.0021019	0.0532929	5.53034	0.0179144	0.893525	0.956224	256.868	213.463	81.6207	132.237	225.878	162.543	29.3488	45.3085	64.4169
BJN34_04965	BMP family ABC transporter substrate-binding protein	-1.46441	8.77534	23.3194	1.37e-06	1.48e-05	-1.32131	8.77534	19.1407	1.21e-05	0.000275664	-0.143107	8.77534	0.230739	0.630976	0.823102	178.486	176.632	250.587	208.625	278.467	205.185	389.684	553.361	454.082
BJN34_04970	ABC transporter permease	-0.311465	4.92444	1.61654	0.203575	0.339816	-0.309468	4.92444	1.60377	0.20537	0.465307	-0.00199774	4.92444	6.67e-05	0.993481	0.998834	22.9017	28.5068	26.2803	25.9252	26.876	26.8793	26.7428	26.0199	25.8948
BJN34_04975	sugar ABC transporter permease	-0.306497	5.14783	1.61961	0.203146	0.339344	-0.429962	5.14783	3.16775	0.0751059	0.24884	0.123465	5.14783	0.261009	0.609428	0.808368	29.8618	26.7695	21.9066	26.6124	21.9035	24.7942	25.1926	21.7611	31.8016
BJN34_04980	ABC transporter	0.0593493	6.83404	0.0663322	0.796754	0.87456	-0.0728917	6.83404	0.0998664	0.75199	0.893868	0.132241	6.83404	0.331421	0.564824	0.783893	75.6098	70.0363	54.5239	52.16	62.7671	70.1298	47.2399	47.727	60.4911
BJN34_04985	pirin family protein	0.670465	5.53899	5.63238	0.0176316	0.0500539	0.210507	5.53899	0.550064	0.458292	0.717982	0.459958	5.53899	2.72787	0.0986108	0.30909	53.2449	63.9323	47.6736	29.7702	43.9538	47.9969	22.2686	24.9049	37.2219
BJN34_04990	glycine/betaine ABC transporter permease	-2.43741	3.26998	20.8127	5.06e-06	4.68e-05	-1.1517	3.26998	5.45027	0.0195653	0.100572	-1.28571	3.26998	5.71806	0.0167912	0.100557	4.09787	3.2364	3.52245	14.5571	5.92093	7.54523	24.9805	11.7562	12.0588
BJN34_04995	glycine/betaine ABC transporter substrate-binding protein	-2.82591	3.97931	24.5233	7.34e-07	8.5e-06	-1.39163	3.97931	6.90651	0.00858825	0.0556196	-1.43428	3.97931	6.5294	0.0106106	0.0752741	2.86813	5.70021	3.04189	9.44567	14.2838	8.34866	37.8766	12.3163	15.8215
BJN34_05000	choline ABC transporter permease	-4.74161	3.92761	62.3809	2.83e-15	1.32e-13	-1.20528	3.92761	6.54737	0.0105039	0.0637868	-3.53633	3.92761	35.0209	3.26e-09	1.28e-07	1.32126	0.905	1.16674	21.554	20.493	10.3749	46.4098	19.4517	30.308
BJN34_05005	glycine/betaine ABC transporter ATP-binding protein	-2.39645	5.34378	31.0221	2.55e-08	4.06e-07	-0.790974	5.34378	3.83372	0.0502313	0.190472	-1.60548	5.34378	14.3942	0.000148257	0.00286741	7.86131	11.3846	9.48255	31.8435	33.8397	23.8336	62.9152	27.1673	30.2416
BJN34_05010	hypothetical protein	-0.324742	3.62873	0.767145	0.381102	0.534465	-0.0891405	3.62873	0.0593578	0.807514	0.919899	-0.235601	3.62873	0.413432	0.520233	0.749499	24.3555	27.8878	19.6772	27.8049	20.8993	37.6692	31.9726	18.2496	21.2894
BJN34_05015	ScaI family restriction endonuclease	-0.58613	7.12631	7.00591	0.00812408	0.0260422	-0.536232	7.12631	5.88343	0.0152841	0.0835255	-0.0498976	7.12631	0.0508225	0.821638	0.927179	156.33	197.462	143.939	180.271	147.612	199.312	174.238	211.547	223.852
BJN34_05020	hypothetical protein	-0.612405	4.31274	4.45519	0.0347953	0.0869695	-0.308843	4.31274	1.17392	0.278597	0.55527	-0.303562	4.31274	1.09773	0.294765	0.571536	51.3186	65.8397	37.7085	64.6149	48.6163	82.2976	51.221	69.8752	71.1026
BJN34_05025	transposase	0.381588	4.48898	2.03737	0.153474	0.276806	-0.0456786	4.48898	0.0282653	0.866487	0.948656	0.427266	4.48898	2.63059	0.104823	0.320156	16.7197	14.9175	11.2251	11.9894	7.80665	12.593	7.53708	8.72554	10.2061
BJN34_05030	transposase	N/A	N/A	N/A	N/A	N/A	N/A	N/A	N/A	N/A	N/A	N/A	N/A	N/A	N/A	N/A	1.53411	1.03095	1.4746	1.92819	1.18793	1.44185	1.80137	1.66735	1.78483
BJN34_05035	transposase	-0.32697	4.52843	1.30268	0.253724	0.400797	-0.0644911	4.52843	0.0519842	0.819646	0.925661	-0.262478	4.52843	0.857461	0.35445	0.627676	31.9459	49.2893	26.8074	38.0908	42.266	50.7201	35.8765	34.5405	38.415
BJN34_05040	site-specific DNA-methyltransferase	0.10167	8.54674	0.14476	0.703594	0.810192	-0.0282798	8.54674	0.0111968	0.915729	0.969325	0.129949	8.54674	0.236859	0.626484	0.820978	458.803	465.99	249.203	322.467	387.74	361.325	238.712	369.588	271.213
BJN34_05050	glycine zipper 2TM domain-containing protein	1.43837	9.64222	29.8101	4.76e-08	7.06e-07	1.68502	9.64222	40.3851	2.09e-10	1.03e-08	-0.246645	9.64222	0.916748	0.33833	0.613085	1754	1760.33	1320.31	1533.25	2163.67	2098.87	348.696	581.012	528.307
BJN34_05055	oxygen-independent coproporphyrinogen III oxidase-like protein	-0.357315	6.49381	1.85779	0.17288	0.302507	-0.448714	6.49381	2.92463	0.0872372	0.273813	0.0913991	6.49381	0.121427	0.727492	0.87583	51.4674	54.3924	68.5558	56.6719	59.1301	53.7189	61.9055	55.8224	66.4147
BJN34_05060	non-canonical purine NTP pyrophosphatase, RdgB/HAM1 family	-0.71238	5.53877	4.80619	0.0283577	0.0737597	-0.503404	5.53877	2.43146	0.118922	0.335952	-0.208975	5.53877	0.414396	0.519747	0.749126	49.2573	41.5857	61.6473	58.8332	64.2735	59.7389	79.785	46.9374	78.4835
BJN34_05065	ribonuclease PH	-0.587472	6.05531	3.43946	0.0636563	0.141042	-0.390974	6.05531	1.5373	0.21502	0.479329	-0.196497	6.05531	0.386266	0.534269	0.760564	69.1168	63.5519	64.0146	72.3744	84.6316	72.926	95.3731	48.8886	94.2268
BJN34_05070	serine/threonine protein phosphatase	0.703018	6.99642	5.75511	0.0164408	0.0470008	0.508118	6.99642	3.01352	0.0825729	0.264231	0.1949	6.99642	0.451755	0.501503	0.735212	172.612	179.412	95.2491	122.901	99.4535	172.138	55.1619	95.126	71.4508
BJN34_05075	serine/threonine protein kinase	0.469215	8.38366	4.4736	0.0344224	0.0862965	0.633135	8.38366	8.13233	0.00434828	0.0339048	-0.16392	8.38366	0.553208	0.45701	0.707272	285.077	339.27	255.15	337.817	277.278	393.315	164.518	171.398	179.165
BJN34_05080	YicC family protein	-1.17585	7.2362	18.5377	1.67e-05	0.000132115	-0.731235	7.2362	7.3328	0.00677074	0.0466938	-0.44461	7.2362	2.69108	0.100912	0.312483	81.6816	94.9426	94.2287	107.34	142.006	128.902	183.983	138.063	176.859
BJN34_05085	guanylate kinase	-0.860127	6.6418	16.517	4.82e-05	0.000331864	-0.69658	6.6418	10.9612	0.000930381	0.0101769	-0.163546	6.6418	0.595958	0.440124	0.694173	111.015	101.395	87.809	119.543	114.4	108.052	144.49	151.466	145.785
BJN34_05090	DNA-directed RNA polymerase subunit omega	-0.931777	7.66001	17.7655	2.5e-05	0.000187045	-0.608159	7.66001	7.68361	0.00557245	0.0405716	-0.323617	7.66001	2.16211	0.141451	0.379403	568.493	646.184	648.596	820.728	767.182	814.121	912.033	1013.95	992.626
BJN34_05095	guanosine-3',5'-bis(diphosphate) 3'-pyrophosphohydrolase	-0.321942	8.82849	1.92261	0.16557	0.292525	-0.108774	8.82849	0.220204	0.638885	0.836068	-0.213168	8.82849	0.844941	0.357987	0.630714	156.511	160.413	119.887	168.079	171.387	173.821	162.169	144.28	131.347
BJN34_05100	transcription elongation factor GreB	-0.291089	6.04669	1.5596	0.211724	0.35088	-0.163178	6.04669	0.494156	0.482079	0.735894	-0.127911	6.04669	0.303369	0.581778	0.793427	93.7864	99.2313	81.5152	88.8091	112.871	102.981	84.6527	106.692	81.6422
BJN34_05110	hypothetical protein	1.66472	2.21429	8.14504	0.00431791	0.0154828	0.147928	2.21429	0.0559022	0.813094	0.922198	1.5168	2.21429	7.27156	0.00700548	0.0564023	21.0353	33.3393	18.5304	7.74411	9.31541	7.77959	4.19475	12.789	0.06817
BJN34_05120	hypothetical protein	1.01044	5.06319	5.54231	0.0185621	0.0521607	0.597	5.06319	1.94029	0.163637	0.406667	0.413441	5.06319	0.965888	0.325708	0.600266	137.914	145.617	124.063	97.3911	86.2157	129.769	21.5772	103.363	43.4581
BJN34_05125	Fe2+-dependent dioxygenase	0.857209	3.30786	0.999696	0.317384	0.469594	0.294644	3.30786	0.118497	0.730671	0.884966	0.562565	3.30786	0.440198	0.507027	0.740957	2.99789	6.15758	34.0992	20.9778	6.7826	4.9496	5.28685	6.39044	9.40074
BJN34_05130	hypothetical protein	0.972243	7.80584	11.32	0.000766748	0.00364877	1.03935	7.80584	12.9145	0.000326049	0.00435823	-0.0671062	7.80584	0.0555945	0.8136	0.921689	957.981	839.573	474.893	632.934	807.054	942.395	225.551	317.847	389.96
BJN34_05135	PLP-dependent aminotransferase family protein	0.0907222	3.81517	0.051035	0.821272	0.891159	0.417967	3.81517	1.10622	0.292905	0.567607	-0.327245	3.81517	0.698474	0.403297	0.667685	8.1759	11.0512	3.83641	7.75765	8.62631	12.7456	3.67353	6.48395	7.35557
BJN34_05140	alkylhydroperoxidase	0.419821	4.38745	1.26514	0.260681	0.408545	0.349232	4.38745	0.875075	0.349554	0.623792	0.0705887	4.38745	0.0372477	0.846962	0.939051	64.3799	41.5514	29.3697	40.952	33.2397	55.7563	23.5059	39.3943	17.5086
BJN34_05145	IS5 family transposase	0.55021	1.0198	0.611812	0.434106	0.583014	0.497047	1.0198	0.499449	0.479742	0.734238	0.0531631	1.0198	0.00686741	0.933955	0.975279	0.590811	1.98989	1.26407	1.0167	0.616019	2.32079	0.385649	0.872206	0.64579
BJN34_05150	DUF2252 domain-containing protein	0.525342	3.68837	1.70908	0.191105	0.324874	-0.203778	3.68837	0.245945	0.619945	0.824284	0.72912	3.68837	3.31757	0.0685433	0.248869	14.5252	9.7461	6.17299	5.08067	5.79105	7.44186	4.3525	8.66671	3.81132
BJN34_05155	hypothetical protein	0.0308184	3.24821	0.00885372	0.925034	0.957533	-0.173952	3.24821	0.275366	0.599755	0.810407	0.20477	3.24821	0.40041	0.526877	0.755144	27.2182	32.0986	18.5041	24.9036	18.8474	25.7878	16.8407	18.3163	26.5847
BJN34_05160	aspartyl beta-hydroxylase	-1.17598	7.50832	22.9183	1.69e-06	1.78e-05	-0.557852	7.50832	5.31105	0.0211906	0.106708	-0.618124	7.50832	6.42103	0.0112777	0.0781712	105.385	101.647	119.361	177.586	176.538	162.103	208.868	186.203	208.865
BJN34_05165	histidine kinase	0.121861	6.48768	0.259165	0.610694	0.739497	0.0441196	6.48768	0.0339481	0.853817	0.942125	0.0777413	6.48768	0.106666	0.743972	0.886031	56.3161	67.4028	40.5463	50.1986	50.3461	56.781	30.6098	42.3123	49.7714
BJN34_05170	2-aminoadipate aminotransferase	0.0884076	4.9502	0.13777	0.710508	0.815712	-0.282873	4.9502	1.37382	0.241156	0.513133	0.371281	4.9502	2.43661	0.118532	0.344374	21.397	19.2661	20.0627	15.2329	14.1842	18.7684	12.4915	16.4494	17.9134
BJN34_05175	hypothetical protein	-0.806719	1.24229	0.424852	0.514526	0.658771	-2.37761	1.24229	3.22841	0.0723707	0.243153	1.57089	1.24229	1.43518	0.230921	0.504703	2.67822	0	8.15418	1.41141	0	2.69312	3.59483	0.457207	13.2237
BJN34_05180	NAD(P)/FAD-dependent oxidoreductase	-1.15659	7.02994	23.4334	1.29e-06	1.4e-05	-0.40053	7.02994	2.91976	0.0875011	0.274516	-0.756062	7.02994	10.1197	0.00146696	0.0176955	39.4129	42.6548	44.7768	72.2655	76.893	71.0449	78.0225	72.7956	80.5276
BJN34_05185	NAD(FAD)-utilizing dehydrogenase	-0.538359	5.1856	2.19223	0.138708	0.256248	0.196304	5.1856	0.299879	0.583959	0.800884	-0.734663	5.1856	4.13159	0.0420898	0.183563	16.0054	21.4026	16.2564	33.089	33.4528	24.7144	27.1849	11.8008	23.5088
BJN34_05190	peptidase	-1.01702	5.12498	18.6326	1.58e-05	0.000126422	-0.689317	5.12498	8.90041	0.00285107	0.0240155	-0.327698	5.12498	1.89508	0.16863	0.420909	34.4053	34.4247	36.2795	43.0565	42.9206	50.1967	51.5103	56.0062	67.9589
BJN34_05195	SAM-dependent methyltransferase	-0.282037	6.64576	1.46631	0.225928	0.368077	-0.18774	6.64576	0.65296	0.419056	0.685051	-0.0942972	6.64576	0.164703	0.684863	0.854105	85.0758	98.5702	96.9347	90.3056	103.718	114.248	85.2158	91.795	103.674
BJN34_05200	OmpA family protein	-0.902795	7.28703	10.3855	0.00127006	0.0055447	-0.0569681	7.28703	0.0424438	0.836776	0.934189	-0.845827	7.28703	9.15543	0.00247982	0.0264759	77.0763	73.3949	42.3572	120.369	114.381	113.4	60.8533	120.684	112.14
BJN34_05205	hypothetical protein	-0.554272	6.81313	2.24505	0.134042	0.249857	0.131652	6.81313	0.128239	0.720265	0.881484	-0.685924	6.81313	3.44086	0.0636026	0.237404	90.8014	108.078	70.735	145.545	125.62	170.124	43.7935	157.469	127.705
BJN34_05210	DUF342 domain-containing protein	-1.82979	8.13579	22.3558	2.27e-06	2.3e-05	1.21228	8.13579	10.3132	0.00132083	0.0133121	-3.04207	8.13579	56.7983	4.83e-14	2.63e-12	28.3695	22.5302	52.1105	328.421	255.145	319.67	70.9776	134.886	107.992
BJN34_05215	hypothetical protein	0.245899	2.95362	0.253427	0.614673	0.743016	-0.663125	2.95362	1.71384	0.190488	0.446947	0.909024	2.95362	3.33018	0.0680196	0.247747	65.0496	40.621	44.638	30.2909	25.1299	25.2231	12.4916	63.7801	29.1777
BJN34_05220	CapA family protein	0.611156	3.22768	1.69328	0.193169	0.327159	0.0763795	3.22768	0.0256831	0.872677	0.951759	0.534777	3.22768	1.34302	0.246503	0.522752	8.66175	10.3461	7.29633	6.03442	2.84671	9.69652	2.25025	7.08744	4.69325
BJN34_05225	FAD-linked oxidase	0.489743	2.85261	1.79782	0.179977	0.31115	0.270163	2.85261	0.532035	0.465752	0.72261	0.21958	2.85261	0.403579	0.525247	0.753879	6.03555	5.37363	3.07874	4.20874	3.62132	4.54647	2.16327	3.80352	2.2769
BJN34_05230	polyphosphate kinase 2	0.359371	4.79743	1.45895	0.227098	0.369088	-0.0549439	4.79743	0.0334447	0.854893	0.942415	0.414315	4.79743	1.97447	0.159974	0.408129	37.5353	33.0815	22.5878	15.8531	25.7549	28.288	18.129	22.9812	16.9747
BJN34_05235	hypothetical protein	0.546964	3.76846	2.21208	0.136934	0.253951	0.406222	3.76846	1.21339	0.270662	0.547012	0.140742	3.76846	0.157467	0.691499	0.857276	108.832	87.7252	69.1077	82.4328	47.9362	114.417	51.6818	55.3328	36.0433
BJN34_05240	hypothetical protein	0.945455	5.47409	5.40187	0.0201152	0.055778	0.370643	5.47409	0.832498	0.361551	0.634074	0.574812	5.47409	2.05051	0.152155	0.398044	104.063	127.316	39.8858	72.7479	35.1648	74.011	28.282	50.8987	32.8365
BJN34_05250	hypothetical protein	-0.72882	3.244	1.76228	0.18434	0.31656	-0.311982	3.244	0.333412	0.563657	0.788755	-0.416838	3.244	0.580215	0.446228	0.698549	10.4661	14.6756	14.7942	15.0781	24.8071	14.8883	31.8692	11.974	9.43007
BJN34_05260	fructose-bisphosphatase	-0.798857	8.16499	11.6381	0.000646136	0.00315726	-0.582395	8.16499	6.23738	0.0125082	0.0725956	-0.216463	8.16499	0.86169	0.353266	0.626843	178.149	188.037	197.549	218.429	230.699	224.177	276.857	249.421	274.622
BJN34_05265	aminopeptidase N	-0.307628	7.83709	2.11409	0.145949	0.266739	-0.299298	7.83709	2.00323	0.156964	0.397957	-0.00832997	7.83709	0.00155308	0.968564	0.989183	74.7322	69.6224	61.2701	66.5663	64.9343	79.5881	55.2454	79.1274	73.8701
BJN34_05270	DUF4136 domain-containing protein	1.54028	6.04236	28.5613	9.08e-08	1.26e-06	1.52966	6.04236	28.1971	1.1e-07	3.89e-06	0.0106193	6.04236	0.00150906	0.969013	0.989183	154.213	130.132	77.6372	112.453	113.794	134.283	21.1626	38.9533	40.1674
BJN34_05275	NADP-dependent malic enzyme	-0.665911	9.82279	6.85785	0.00882526	0.0279472	-0.38919	9.82279	2.35793	0.124648	0.343849	-0.276721	9.82279	1.19244	0.274837	0.552547	268.517	258.529	275.486	335.778	342.801	318.825	239.343	406.026	412.531
BJN34_05280	hypothetical protein	2.44774	4.07019	19.0835	1.25e-05	0.000103383	0.346086	4.07019	0.383338	0.535822	0.772601	2.10165	4.07019	14.8902	0.000113956	0.00227387	164.827	179.254	35.2095	18.1775	24.5847	42.7193	16.295	16.0539	19.6183
BJN34_05285	porin	-0.495862	8.14749	2.00303	0.156985	0.281088	-0.464355	8.14749	1.758	0.184874	0.440016	-0.0315063	8.14749	0.00811981	0.9282	0.97275	260.038	270.711	95.8729	211.44	256.242	161.348	235.578	233.389	225.743
BJN34_05290	OHCU decarboxylase	1.86313	5.08735	26.7599	2.3e-07	2.93e-06	2.0518	5.08735	32.403	1.25e-08	5.16e-07	-0.188669	5.08735	0.325821	0.56813	0.786161	94.6612	85.5934	33.9877	75.6866	80.3981	86.2804	15.4972	18.5028	11.7659
BJN34_05295	allantoinase	1.80242	5.9964	23.7271	1.11e-06	1.23e-05	2.00749	5.9964	29.2049	6.51e-08	2.4e-06	-0.205068	5.9964	0.343311	0.557925	0.778832	89.5601	101.376	30.0832	86.803	81.0511	83.8	13.732	19.6332	16.3487
BJN34_05300	purine permease	1.79658	6.58653	22.4186	2.19e-06	2.24e-05	2.17471	6.58653	32.232	1.37e-08	5.61e-07	-0.378127	6.58653	1.08949	0.296584	0.573457	87.9512	90.6344	33.4423	94.4532	72.2489	108.385	9.07686	22.2712	17.5528
BJN34_05305	GntR family transcriptional regulator	1.47143	6.06426	4.7783	0.0288206	0.0747393	0.623653	6.06426	0.883623	0.347211	0.620933	0.847772	6.06426	1.63808	0.200589	0.464663	161.715	162.656	41.8662	63.8804	42.8873	94.9146	7.22625	69.4042	30.6863
BJN34_05310	hydroxyisourate hydrolase	1.17326	5.97267	6.82475	0.00899031	0.0283853	0.730845	5.97267	2.6763	0.101852	0.303743	0.442413	5.97267	1.00612	0.315835	0.591838	281.368	263.455	107.818	152.538	118.347	209.473	29.2511	116.692	88.6545
BJN34_05315	hypothetical protein	1.38892	7.16608	6.97989	0.00824306	0.0263747	1.53465	7.16608	8.46178	0.00362687	0.0292345	-0.145727	7.16608	0.0803272	0.776855	0.902507	171.511	160.407	52.0556	148.291	105.483	168.542	11.3363	58.1932	49.5174
BJN34_05320	group II intron reverse transcriptase/maturase	-0.859959	5.35827	10.2848	0.0013413	0.00581176	-0.90363	5.35827	11.3602	0.000750357	0.00860178	0.0436701	5.35827	0.0259842	0.871939	0.950271	17.1679	19.8813	23.2608	19.567	20.4586	20.5453	32.4038	27.4057	29.8914
BJN34_05325	hypothetical protein	-2.58507	6.44114	32.4413	1.23e-08	2.15e-07	-2.77129	6.44114	36.669	1.4e-09	6.38e-08	0.186214	6.44114	0.181806	0.669826	0.845424	111.658	78.7431	24.9617	45.0401	65.2329	75.198	405.763	301.984	292.633
BJN34_05330	UPF0016 domain-containing protein	-4.13128	8.35643	136.956	1.23e-31	1.2e-29	-3.02121	8.35643	81.7819	1.52e-19	1.62e-17	-1.11006	8.35643	12.0262	0.000524589	0.00812585	92.5537	62.8104	62.0787	113.862	203.297	155.89	1147	846.091	1068.54
BJN34_05335	fatty acid desaturase	-2.07771	9.02978	42.4496	7.25e-11	1.92e-09	-0.495491	9.02978	2.61241	0.106031	0.312407	-1.58222	9.02978	25.3711	4.73e-07	1.43e-05	181.811	180.121	78.8421	463.6	457.603	389.781	550.583	438.544	473.983
BJN34_05340	guanine deaminase	2.20986	7.71142	9.3857	0.00218684	0.00870713	1.9694	7.71142	7.57732	0.00591073	0.0423225	0.240461	7.71142	0.121747	0.727147	0.87583	294.005	315.162	26.1726	227.961	149.997	143.585	14.3982	42.0277	52.4683
BJN34_05345	adenosine deaminase	1.34775	8.01937	12.8452	0.000338344	0.00181043	1.32456	8.01937	12.4207	0.000424591	0.0054442	0.0231919	8.01937	0.0039688	0.949768	0.982616	361.058	351.207	125.434	338.196	200.138	282.811	56.5527	117.562	89.2682
BJN34_05350	xanthine dehydrogenase accessory protein XdhC	2.32508	7.71784	11.9379	0.000550048	0.00274957	2.55851	7.71784	14.2053	0.00016391	0.00247797	-0.233431	7.71784	0.133258	0.715078	0.870023	344.786	323.107	65.9758	370.331	173.216	308.738	9.14834	58.2705	50.8412
BJN34_05355	xanthine dehydrogenase molybdopterin binding subunit	1.80739	10.2758	8.19415	0.00420258	0.0151398	1.86675	10.2758	8.70828	0.00316768	0.0264891	-0.0593573	10.2758	0.00940127	0.922758	0.970965	804.096	826.695	221.38	834.264	461.986	614.593	29.5575	236.688	165.246
BJN34_05360	xanthine dehydrogenase small subunit	0.582992	9.68872	3.81838	0.0506931	0.117785	1.10584	9.68872	13.5227	0.000235691	0.00336479	-0.522849	9.68872	3.08487	0.0790235	0.270469	541.475	495.66	367.56	754.048	735.516	543.051	169.007	366.185	232.538
BJN34_05365	LysR family transcriptional regulator	-0.82444	5.96886	9.52718	0.00202451	0.00818312	-0.359362	5.96886	1.8592	0.172717	0.421088	-0.465078	5.96886	3.04861	0.0808065	0.274806	47.3193	42.1276	35.0233	54.0349	64.1836	55.9663	65.627	44.8237	66.804
BJN34_05370	hypothetical protein	1.30813	3.60992	2.87383	0.0900301	0.184617	1.17225	3.60992	2.3161	0.128041	0.350834	0.135876	3.60992	0.0331839	0.855454	0.943158	15.5872	10.8264	6.70994	7.86005	10.6787	11.6857	5.00414	5.21907	0
BJN34_05375	hypothetical protein	0.337812	2.53485	0.50948	0.475364	0.62255	0.638443	2.53485	1.89384	0.168769	0.414089	-0.300631	2.53485	0.461224	0.497052	0.731588	4.63859	3.55366	1.56244	4.61798	2.38939	5.23912	1.43873	2.8159	1.94385
BJN34_05385	hypothetical protein	0.806517	1.67344	2.48325	0.115064	0.221614	0.572099	1.67344	1.19832	0.273657	0.550175	0.234417	1.67344	0.263067	0.608021	0.807434	10.8416	6.66748	4.48881	7.06065	5.49206	6.32918	3.96138	3.16489	2.89642
BJN34_05390	integrase	0.349523	3.58314	1.51646	0.218156	0.358829	0.173473	3.58314	0.36625	0.545055	0.776911	0.17605	3.58314	0.420192	0.516841	0.748168	6.83869	6.2143	4.67111	5.59662	4.69559	5.66293	3.19401	3.92361	4.08191
BJN34_05395	integrase	-0.365851	2.50308	0.966443	0.325569	0.47729	0.075194	2.50308	0.0453601	0.831343	0.931277	-0.441045	2.50308	1.53166	0.215863	0.488289	2.50441	1.89139	1.18931	2.74157	2.70048	2.40758	1.74554	2.09685	1.96555
BJN34_05400	integrase	-0.00967411	2.28497	0.00059867	0.98048	0.98905	0.0748939	2.28497	0.0372589	0.846939	0.939698	-0.084568	2.28497	0.0506965	0.821856	0.927179	2.79506	2.84172	1.8133	2.86109	2.84247	2.19376	2.20186	1.61488	1.87142
BJN34_05410	hypothetical protein	-0.438787	1.17271	0.43632	0.508904	0.653917	-0.489654	1.17271	0.543882	0.460828	0.720103	0.0508673	1.17271	0.00569812	0.939828	0.977423	12.1582	3.64718	5.39874	5.80063	5.52782	10.2077	5.04298	3.72831	14.3882
BJN34_05415	hypothetical protein	-0.269974	2.23864	0.299376	0.584274	0.718819	-0.729113	2.23864	2.05754	0.151455	0.389288	0.459138	2.23864	0.817511	0.365909	0.636411	25.4721	30.3282	12.0895	7.17806	20.6726	20.3225	12.8363	23.7063	29.5302
BJN34_05420	tungsten ABC transporter substrate-binding protein	-2.2569	6.49293	48.4519	3.38e-12	1.13e-10	-2.38644	6.49293	53.6027	2.45e-13	1.54e-11	0.129534	6.49293	0.16542	0.684215	0.854049	54.3217	43.6853	29.9667	30.2901	36.1399	51.4713	107.533	229.882	162.626
BJN34_05425	LysR family transcriptional regulator	-1.77158	6.37126	47.1361	6.62e-12	2.14e-10	-1.76181	6.37126	46.7548	8.04e-12	4.46e-10	-0.00976673	6.37126	0.00143517	0.96978	0.989183	44.0489	36.3375	29.1937	39.9008	30.8026	41.3579	68.9748	124.679	113.196
BJN34_05430	DUF4126 domain-containing protein	-0.193526	4.95637	0.719406	0.396339	0.54995	-0.175844	4.95637	0.597547	0.439515	0.702008	-0.017682	4.95637	0.0060889	0.937803	0.976326	45.6497	47.7646	32.9056	48.4738	39.906	41.3237	34.9573	42.6696	39.8191
BJN34_05435	ABC transporter permease	0.702438	5.5317	8.27963	0.00400924	0.0145112	0.215977	5.5317	0.769992	0.38022	0.65116	0.486461	5.5317	4.12278	0.0423095	0.183783	25.4196	18.4749	15.2924	14.9703	11.7223	16.2637	7.93304	11.2998	10.2284
BJN34_05440	hemoglobin-like protein	-0.108687	4.64254	0.108704	0.741625	0.837822	0.00278368	4.64254	7.22e-05	0.993222	0.996376	-0.11147	4.64254	0.116602	0.73275	0.878602	52.9186	53.2458	39.3916	46.2907	58.0364	54.8845	50.2283	25.2469	49.4737
BJN34_05445	DUF924 domain-containing protein	0.339254	5.15023	1.45556	0.227638	0.36953	0.154328	5.15023	0.299433	0.584238	0.800884	0.184927	5.15023	0.445056	0.504692	0.738163	70.7527	62.8805	40.5099	41.5475	58.4229	53.5958	26.6773	39.184	45.7624
BJN34_05450	Rossman fold protein, TIGR00730 family	-0.450264	5.9568	4.15401	0.041536	0.100593	-0.521577	5.9568	5.56513	0.0183216	0.0953827	0.0713127	5.9568	0.103427	0.747755	0.887633	97.2639	73.6218	77.9896	78.3332	81.6613	81.7363	87.3198	91.3638	98.6122
BJN34_05455	TetR family transcriptional regulator	-0.87418	6.58683	9.95613	0.00160314	0.00673524	-0.673217	6.58683	5.9703	0.0145488	0.0804599	-0.200963	6.58683	0.528898	0.467071	0.714064	75.8925	98.7812	92.4159	101.986	108.887	104.297	152.53	103	141.299
BJN34_05460	diacylglycerol kinase	0.491987	3.31343	0.154453	0.694316	0.802712	0.895686	3.31343	0.508329	0.475863	0.731285	-0.403699	3.31343	0.105435	0.745403	0.886877	32.6885	1.11351	15.1479	22.0652	1.06266	44.9817	22.6073	1.83332	1.39614
BJN34_05465	alpha-mannosyltransferase	-0.0738075	4.97704	0.0699123	0.791464	0.871102	-0.159312	4.97704	0.325002	0.568617	0.791537	0.0855043	4.97704	0.0948407	0.758111	0.891956	28.2073	22.8146	21.2986	31.0186	19.6083	18.9422	21.8917	19.9654	19.4537
BJN34_05470	UDP-2,3-diacylglucosamine hydrolase	0.104936	1.55276	0.0323722	0.857213	0.913938	0.400155	1.55276	0.500863	0.479121	0.733946	-0.295219	1.55276	0.295618	0.586642	0.796225	1.318	2.36485	1.96636	2.08737	3.3723	1.3978	1.19397	1.02117	2.10842
BJN34_05475	acetyltransferase	-1.17172	3.80582	8.18307	0.00422831	0.0152087	-0.600777	3.80582	2.28026	0.13103	0.35541	-0.57094	3.80582	1.92916	0.16485	0.414912	10.2926	3.68563	8.09325	14.3717	8.97831	11.0693	15.7104	13.2796	12.0008
BJN34_05480	RDD family protein	-1.31385	3.88788	3.21327	0.0730432	0.156725	-1.70319	3.88788	5.26094	0.0218092	0.108795	0.389345	3.88788	0.281972	0.595412	0.801546	15.7128	14.0288	18.5911	31.7668	4.47304	1.96409	37.1191	31.0557	31.4878
BJN34_05485	DUF3106 domain-containing protein	-0.163699	6.61086	0.227899	0.633086	0.758123	-0.608015	6.61086	3.1083	0.0778941	0.255284	0.444315	6.61086	1.66741	0.196605	0.459323	161.971	135.902	54.5015	85.8982	62.6007	110.287	89.4741	126.702	97.0228
BJN34_05490	DUF3619 domain-containing protein	-0.295739	7.74685	0.892144	0.344897	0.496973	-0.78325	7.74685	6.17627	0.0129475	0.0740897	0.487511	7.74685	2.40923	0.120621	0.348719	607.286	520.401	230.209	266.334	287.885	410.422	361.53	465.573	500.565
BJN34_05495	RNA polymerase sigma factor	-0.112194	7.68931	0.280171	0.596589	0.728601	-0.2142	7.68931	1.01979	0.31257	0.588215	0.102006	7.68931	0.232039	0.630016	0.822752	358.04	353.43	242.731	292.732	277.81	329.275	266.893	276.307	286.302
BJN34_05500	acetolactate synthase, large subunit, biosynthetic type	-1.66645	9.60936	23.1711	1.48e-06	1.59e-05	-0.758167	9.60936	5.00488	0.0252759	0.119604	-0.908287	9.60936	7.12884	0.00758537	0.0593459	160.668	166.015	236.611	354.434	459.648	278.918	453.905	403.189	631.969
BJN34_05505	acetolactate synthase small subunit	-1.31586	7.43042	10.8392	0.000993712	0.0045296	-0.683269	7.43042	3.00492	0.0830121	0.264873	-0.632589	7.43042	2.56176	0.109477	0.328288	149.997	129.678	249.584	229.318	400.677	223.462	264.873	391.199	464.82
BJN34_05510	ketol-acid reductoisomerase	-1.7343	10.1348	23.7716	1.08e-06	1.2e-05	-1.21686	10.1348	12.0407	0.000520506	0.00635623	-0.517441	10.1348	2.2241	0.135872	0.371424	400.799	380.479	684.583	718.614	879.35	594.317	1184.23	1621.93	1305.18
BJN34_05515	phosphatidylserine decarboxylase	-0.939919	6.86153	9.88513	0.0016662	0.00695822	-0.240214	6.86153	0.662922	0.41553	0.681623	-0.699704	6.86153	5.52147	0.0187845	0.107491	96.9667	100.251	108.076	163.523	175.16	171.171	200.487	115.022	157.275
BJN34_05520	CDP-diacylglycerol--serine O-phosphatidyltransferase	-0.633655	7.26619	5.84122	0.015655	0.045127	-0.132172	7.26619	0.257966	0.611521	0.818332	-0.501483	7.26619	3.67769	0.0551451	0.216577	118.936	107.484	108.267	157.504	165.687	161.734	160.302	105.915	153.6
BJN34_05525	peptidoglycan-binding protein LysM	0.00542735	8.17027	0.000603411	0.980402	0.98905	-0.0938541	8.17027	0.180326	0.671093	0.854125	0.0992814	8.17027	0.202394	0.652795	0.836342	544.139	596.955	406.135	444.625	442.659	579.026	367.035	416.798	464.2
BJN34_05530	2-isopropylmalate synthase	0.370302	10.7818	0.863271	0.352825	0.504431	0.589987	10.7818	2.18257	0.139581	0.369584	-0.219685	10.7818	0.304524	0.58106	0.79276	1268.02	911.013	893.395	1734.74	646.75	1302.99	363.598	599.314	1001.53
BJN34_05535	hypothetical protein	-0.239843	6.47208	1.08311	0.298003	0.44895	-0.0066524	6.47208	0.000841545	0.976857	0.990012	-0.233191	6.47208	1.03434	0.309141	0.586436	128.345	132.058	129.537	146.11	136.002	189.768	126.004	118.554	130.983
BJN34_05540	branched-chain amino acid ABC transporter substrate-binding protein	-0.551741	5.9638	1.82703	0.176479	0.306916	0.137573	5.9638	0.115424	0.734051	0.886112	-0.689314	5.9638	2.86134	0.0907317	0.293691	20.7056	33.2402	38.7681	42.4815	53.1492	60.4077	43.5247	19.7169	48.4819
BJN34_05545	30S ribosomal protein S15	-1.89189	9.05088	31.0291	2.54e-08	4.06e-07	-1.01147	9.05088	9.31315	0.00227515	0.0201994	-0.880417	9.05088	7.05355	0.00791084	0.060866	700.097	717.733	956.741	1584.47	1670.06	1272.02	3067.75	1871.6	2241.41
BJN34_05550	polyribonucleotide nucleotidyltransferase	-1.78936	10.3934	22.7054	1.89e-06	1.96e-05	-1.32854	10.3934	12.8509	0.000337309	0.00448278	-0.460816	10.3934	1.59028	0.207286	0.474305	261.644	216.549	340.399	356.172	481.546	326.624	1020.63	586.007	697.466
BJN34_05555	NAD(P)H-quinone oxidoreductase	-0.122123	7.43951	0.314744	0.574784	0.711095	-0.29435	7.43951	1.82265	0.176998	0.427799	0.172227	7.43951	0.626138	0.428775	0.686827	162.634	140.704	150.283	126.603	135.857	150.212	114.922	141.639	148.529
BJN34_05560	triose-phosphate isomerase	-1.65047	7.77277	23.5695	1.2e-06	1.32e-05	-0.976166	7.77277	8.55631	0.00344326	0.0280814	-0.674305	7.77277	4.08061	0.0433781	0.186321	120.177	135.738	162.205	236.843	234.26	220.601	436.599	221.838	411.6
BJN34_05565	preprotein translocase subunit SecG	-1.62362	6.30124	19.9609	7.9e-06	6.97e-05	-0.961808	6.30124	7.30379	0.00688092	0.0471701	-0.661813	6.30124	3.40826	0.0648708	0.240776	87.6065	90.0283	108.805	181.968	163.543	122.533	328.872	163.413	221.203
BJN34_05575	NADH-quinone oxidoreductase subunit A	-1.37865	7.33275	10.6567	0.00109674	0.00490875	-0.368294	7.33275	0.790874	0.373836	0.645657	-1.01036	7.33275	5.81351	0.0159035	0.0970184	174.704	174.716	262.607	456.299	477.811	349.224	644.942	255.404	388.398
BJN34_05580	NADH dehydrogenase	-1.77724	8.31129	27.4731	1.59e-07	2.09e-06	-0.698392	8.31129	4.47877	0.0343183	0.148017	-1.07885	8.31129	10.4698	0.00121344	0.0154445	226.307	222.864	325.221	545.207	654.879	497.143	859.857	542.285	777.979
BJN34_05585	NADH-quinone oxidoreductase subunit C	-1.6468	8.72986	21.0319	4.52e-06	4.24e-05	-0.694081	8.72986	3.90583	0.0481187	0.185716	-0.952716	8.72986	7.26584	0.00702782	0.0565164	309.743	241.618	348.369	565.943	763.833	457.39	951.173	560.024	780.234
BJN34_05590	NADH dehydrogenase	-1.15678	9.87631	16.4	5.13e-05	0.000348829	-0.307969	9.87631	1.19276	0.274774	0.551138	-0.848812	9.87631	8.93333	0.00280014	0.0286807	385.974	377.953	400.459	641.333	905.183	589.759	753.369	644.998	715.577
BJN34_05595	NADH-quinone oxidoreductase subunit E	-1.41487	7.96254	28.7991	8.03e-08	1.13e-06	-0.540291	7.96254	4.3717	0.0365405	0.15479	-0.874574	7.96254	11.2231	0.000807859	0.0113923	238.929	249.868	225.575	386.731	542.529	401.45	562.73	497.994	481.885
BJN34_05600	NADH oxidoreductase (quinone) subunit F	-1.2968	9.43971	23.3978	1.32e-06	1.42e-05	-0.68835	9.43971	6.75918	0.00932668	0.0588141	-0.608446	9.43971	5.27286	0.0216603	0.119218	268.486	274.384	296.126	386.712	532.003	389.044	561.674	591.286	534.8
BJN34_05605	NADH-quinone oxidoreductase subunit G	-1.44393	10.1036	30.1583	3.98e-08	6.05e-07	-0.708176	10.1036	7.48659	0.00621602	0.0437849	-0.735752	10.1036	8.05253	0.00454402	0.0409139	229.191	186.994	254.612	373.772	380.082	402.171	492.836	559.538	450.462
BJN34_05610	NADH-quinone oxidoreductase subunit H	-1.40429	8.65106	31.3882	2.11e-08	3.47e-07	-0.496744	8.65106	4.08155	0.0433538	0.172916	-0.907545	8.65106	13.3676	0.000256013	0.00452202	191.058	143.576	196.636	332.217	317.586	381.692	367.656	410.946	378.866
BJN34_05615	NADH-quinone oxidoreductase subunit I	-0.994531	7.8083	15.0352	0.000105522	0.000656455	-0.291053	7.8083	1.32031	0.250536	0.52322	-0.703478	7.8083	7.59034	0.00586819	0.0493287	259.508	220.085	286.213	362.161	439.088	486.624	411.262	451.522	391.744
BJN34_05620	NADH:ubiquinone oxidoreductase subunit J	-1.63931	7.64753	29.3569	6.02e-08	8.76e-07	-0.57745	7.64753	3.84179	0.0499901	0.189869	-1.06186	7.64753	12.6249	0.000380632	0.00636594	115.792	117.884	152.844	231.455	324.863	278.121	375.469	292.601	319.946
BJN34_05625	NADH-quinone oxidoreductase subunit K	-1.27094	6.85811	12.009	0.000529432	0.00266022	-0.292423	6.85811	0.661196	0.416138	0.682017	-0.978519	6.85811	7.2016	0.00728387	0.0577042	131.798	146.181	256.314	287.786	409.178	411.212	400.358	314.126	361.7
BJN34_05630	NADH-quinone oxidoreductase subunit L	-1.38164	9.50779	18.7328	1.5e-05	0.000120785	-0.373451	9.50779	1.41882	0.233598	0.502934	-1.00819	9.50779	10.1392	0.00145153	0.01754	127.041	128.642	218.376	326.044	335.889	340.133	339.267	334.82	359.139
BJN34_05635	NADH-quinone oxidoreductase subunit M	-1.14772	9.25956	18.7408	1.5e-05	0.000120631	-0.337663	9.25956	1.66526	0.196895	0.455192	-0.810055	9.25956	9.45033	0.00211111	0.0236527	197.387	190.386	261.72	367.287	383.437	434.161	372.795	424.139	396.295
BJN34_05640	NADH-quinone oxidoreductase subunit N	-0.808446	9.10321	8.60805	0.00334681	0.0124722	-0.170732	9.10321	0.389598	0.532511	0.770414	-0.637714	9.10321	5.38378	0.0203248	0.113675	188.899	198.481	278.489	373.288	311.346	400.371	283.033	354.521	335.966
BJN34_05645	DUF2818 domain-containing protein	-0.67096	6.29709	5.01446	0.0251365	0.0665309	-0.190032	6.29709	0.410011	0.521964	0.763591	-0.480927	6.29709	2.59255	0.107367	0.325501	129.252	164.31	195.928	278.321	170.232	269.08	228.069	193.936	220.616
BJN34_05650	ADP-ribose pyrophosphatase	-0.353287	7.11811	2.04561	0.152646	0.275886	-0.162002	7.11811	0.432799	0.510619	0.757071	-0.191286	7.11811	0.602277	0.43771	0.693208	163.805	173.875	161.803	189.419	143.247	255.859	152.762	192.576	177.018
BJN34_05655	DUF1178 domain-containing protein	-1.18469	8.26281	16.7075	4.36e-05	0.000304078	-0.226417	8.26281	0.629989	0.427359	0.691525	-0.958269	8.26281	11.0315	0.000895767	0.0122818	415.28	291.812	328.569	503.435	744.736	804.161	450.586	800.382	692.244
BJN34_05660	pimeloyl-CoA dehydrogenase large subunit	-0.230608	9.36776	0.406931	0.523531	0.666348	0.323902	9.36776	0.802749	0.370273	0.641584	-0.554509	9.36776	2.34359	0.1258	0.357129	466.86	406.269	322.628	285.783	740.216	741.712	282.704	437.343	425.008
BJN34_05665	pimeloyl-CoA dehydrogenase small subunit	0.502272	8.7283	1.45871	0.227135	0.369088	0.831272	8.7283	3.96443	0.0464713	0.181175	-0.329	8.7283	0.62918	0.427656	0.686406	466.674	303.764	249.706	233.901	507.315	543.419	97.3524	281.981	212.688
BJN34_05670	dehydratase	0.358775	5.87932	1.81325	0.178119	0.308942	0.537302	5.87932	4.08792	0.0431909	0.172708	-0.178527	5.87932	0.464781	0.495398	0.730224	145.055	107.089	103.763	106.285	143.748	158.835	63.0433	95.2986	67.8478
BJN34_05675	dehydratase	0.733636	6.53124	5.26955	0.0217016	0.0592439	0.448529	6.53124	1.97449	0.159972	0.402681	0.285108	6.53124	0.813549	0.367073	0.636714	311.691	185.395	140.636	158.947	182.103	182.139	82.2958	145.378	80.8007
BJN34_05680	ubiquinol oxidase subunit II	-1.5649	7.95129	7.65254	0.00566925	0.0192515	0.416032	7.95129	0.567025	0.451443	0.712513	-1.98094	7.95129	11.9676	0.00054135	0.00832958	51.753	58.5347	131.193	270.58	487.938	245.928	291.948	96.6518	203.57
BJN34_05685	cytochrome o ubiquinol oxidase subunit I	-1.2624	8.90729	9.17038	0.00245964	0.00962722	0.208241	8.90729	0.25782	0.611622	0.818332	-1.47064	8.90729	12.3266	0.000446555	0.00720734	113.998	75.9003	115.989	201.266	449.348	210.702	231.181	146.111	220.822
BJN34_05690	cytochrome o ubiquinol oxidase subunit III	-1.34933	7.40387	11.2803	0.000783328	0.00370909	0.0722534	7.40387	0.0337589	0.854221	0.942216	-1.42159	7.40387	12.4981	0.000407359	0.00668378	146.68	90.2884	95.5024	192.153	473.742	222.885	257.155	194.344	227.855
BJN34_05695	cytochrome o ubiquinol oxidase subunit IV	-1.27489	6.70313	10.9345	0.000943881	0.00433384	0.0360849	6.70313	0.00915421	0.923777	0.971333	-1.31098	6.70313	11.5754	0.000668311	0.0098455	148.743	122.343	97.1724	190.914	494.239	224.199	237.513	227.348	254.456
BJN34_05700	urea ABC transporter substrate-binding protein	-5.63674	6.6003	60.6094	6.96e-15	3.07e-13	-4.28736	6.6003	40.5802	1.89e-10	9.4e-09	-1.34938	6.6003	4.58988	0.0321612	0.155941	1.47568	4.59155	4.68994	10.0835	11.694	7.30224	42.3933	281.026	154.045
BJN34_05705	urea ABC transporter permease subunit UrtB	-6.55852	3.49994	28.3526	1.01e-07	1.38e-06	-5.31228	3.49994	22.1855	2.48e-06	6.7e-05	-1.24624	3.49994	1.07211	0.30047	0.576585	0.336074	0	0.152927	0.651581	0	0.640932	1.91721	31.6723	10.0786
BJN34_05710	urea ABC transporter permease subunit UrtC	-2.66582	2.36208	9.31519	0.00227262	0.00899178	-3.51413	2.36208	14.4952	0.000140514	0.00216685	0.848309	2.36208	0.836385	0.360433	0.633526	2.25004	1.51615	0.205045	1.31484	0	0.859357	1.8273	10.7859	7.98307
BJN34_05715	urea ABC transporter ATP-binding protein UrtD	-3.42102	1.84416	4.99584	0.0254083	0.0671221	-2.07247	1.84416	2.10935	0.146401	0.381514	-1.34855	1.84416	0.855179	0.355091	0.62849	0.616099	0	1.16506	0	2.33582	2.32064	0	7.84893	10.0597
BJN34_05720	urea ABC transporter ATP-binding subunit UrtE	-1.45196	2.62801	5.22556	0.0222573	0.0604825	-1.83896	2.62801	8.06096	0.00452292	0.0348739	0.387002	2.62801	0.342738	0.558253	0.778832	6.01725	3.80166	3.88709	2.40003	3.82341	4.33697	2.67515	8.41812	21.4252
BJN34_05725	urease accessory protein	0.968838	6.52375	16.1202	5.94e-05	0.000396157	0.285606	6.52375	1.39671	0.237275	0.508007	0.683232	6.52375	8.24859	0.00407836	0.0378027	167.748	132.002	93.0623	85.4819	68.9606	92.6076	45.8912	62.3745	53.2486
BJN34_05730	urease subunit gamma	1.17263	5.03176	10.4546	0.00122345	0.00537509	0.506385	5.03176	1.94176	0.163477	0.406667	0.666249	5.03176	3.55063	0.0595227	0.226621	164.812	172.458	73.3094	54.9616	86.9803	116.442	38.8254	57.1874	49.687
BJN34_05735	urease accessory protein UreJ	1.49803	5.24904	28.8634	7.77e-08	1.1e-06	0.526947	5.24904	3.49207	0.0616635	0.218058	0.971086	5.24904	13.0805	0.000298386	0.00513937	103.377	102.135	56.4714	42.435	37.1893	54.5514	18.7095	27.1295	28.7153
BJN34_05740	urease subunit beta	N/A	N/A	N/A	N/A	N/A	N/A	N/A	N/A	N/A	N/A	N/A	N/A	N/A	N/A	N/A	2.79988	1.99481	2.25809	2.70835	2.28468	1.96016	1.80352	1.94719	2.13845
BJN34_05745	urease subunit alpha	1.38585	7.17593	20.9588	4.69e-06	4.38e-05	0.630863	7.17593	4.42684	0.0353779	0.151301	0.754988	7.17593	6.45921	0.0110379	0.0770426	133.047	119.015	85.8661	70.746	60.3057	71.4179	18.25	46.0332	41.9295
BJN34_05750	urease accessory protein UreE	0.94609	5.89776	15.0899	0.00010251	0.000640015	0.210352	5.89776	0.734536	0.391417	0.661986	0.735738	5.89776	9.42893	0.00213588	0.0238508	136.049	119.035	86.5648	63.3301	67.186	76.1029	34.1141	50.5674	58.7184
BJN34_05755	urease accessory protein UreF	1.13005	5.22202	22.7254	1.87e-06	1.95e-05	0.656728	5.22202	7.51834	0.00610738	0.0432747	0.473326	5.22202	4.4021	0.0358947	0.167476	74.4131	62.9917	54.4287	54.0668	39.537	46.8841	19.1271	27.4043	24.4402
BJN34_05760	urease accessory protein UreG	1.58617	6.01194	36.393	1.61e-09	3.36e-08	0.735762	6.01194	7.84069	0.00510831	0.0381141	0.850413	6.01194	11.2771	0.000784692	0.0111336	167.711	156.627	103.462	91.7524	67.0262	80.8819	29.6705	50.8891	33.9808
BJN34_05765	XRE family transcriptional regulator	-0.444824	3.23088	0.811334	0.367726	0.520299	1.74164	3.23088	14.8644	0.000115524	0.00185588	-2.18646	3.23088	22.7048	1.89e-06	5.19e-05	7.55978	8.81672	4.44013	24.9405	33.8399	42.7605	7.90522	12.0417	3.04856
BJN34_05770	hypothetical protein	0.673592	4.01479	4.17019	0.0411413	0.0999516	0.421922	4.01479	1.61254	0.204135	0.46405	0.25167	4.01479	0.630112	0.427314	0.68616	25.8784	21.4895	11.727	16.4776	12.4695	21.2014	9.52674	9.67809	10.2783
BJN34_05775	glutathione S-transferase	1.38263	7.56549	27.8794	1.29e-07	1.73e-06	0.301641	7.56549	1.35439	0.244513	0.515992	1.08099	7.56549	17.4335	2.98e-05	0.000710384	371.329	374.123	401.241	167.499	202.731	185.478	97.4706	106.888	158.397
BJN34_05780	acyl-CoA dehydrogenase	0.0280379	7.07445	0.0121222	0.912329	0.948494	-0.12945	7.07445	0.257945	0.611535	0.818332	0.157488	7.07445	0.383702	0.535628	0.761226	102.247	81.4237	104.101	90.8425	85.0278	90.1784	84.4459	67.1056	78.4503
BJN34_05785	LysR family transcriptional regulator	-0.464295	5.74293	1.4764	0.224338	0.366349	-0.377411	5.74293	0.979945	0.322212	0.597003	-0.0868837	5.74293	0.051852	0.819871	0.925765	33.397	35.0842	56.8903	59.5139	38.2492	42.3347	63.9683	36.5736	41.0869
BJN34_05790	CAP domain-containing protein	-0.958267	3.58964	3.59915	0.0578091	0.130551	-0.783268	3.58964	2.44592	0.117831	0.33437	-0.174998	3.58964	0.118928	0.7302	0.877304	5.20886	6.42505	6.56671	6.14085	7.36754	7.68847	16.5229	5.16067	6.20055
BJN34_05795	hypothetical protein	1.01053	4.66668	7.83146	0.00513447	0.0178022	0.713864	4.66668	3.89236	0.0485061	0.186483	0.296665	4.66668	0.724324	0.394729	0.659692	33.4933	24.9921	11.9838	18.4154	14.0636	25.0028	7.73264	11.5532	8.26527
BJN34_05800	RNA polymerase subunit sigma-70	0.13896	4.66585	0.203998	0.651513	0.772444	-0.0197897	4.66585	0.00411109	0.948876	0.980224	0.158749	4.66585	0.2718	0.602127	0.805018	50.8367	36.1473	25.5043	33.3799	23.6303	45.5965	25.3099	30.9906	25.6715
BJN34_05805	DUF3520 domain-containing protein	0.0855748	5.04055	0.102921	0.748352	0.841304	-0.302707	5.04055	1.26058	0.261541	0.536821	0.388282	5.04055	2.11991	0.145395	0.386925	21.332	18.4031	15.1925	12.6782	10.642	19.4634	12.4592	13.1247	16.1755
BJN34_05810	gamma-glutamyltransferase	0.249978	8.60937	0.938153	0.332753	0.485026	0.0686105	8.60937	0.0707066	0.790311	0.910654	0.181367	8.60937	0.495275	0.481584	0.721863	201.011	197.534	203.123	165.752	177.799	201.495	90.249	171.95	158.54
BJN34_05815	phosphotransferase family protein	2.20116	8.09613	46.751	8.06e-12	2.53e-10	1.30757	8.09613	17.3044	3.18e-05	0.000629992	0.893592	8.09613	8.37184	0.00381079	0.0361946	431.932	341.864	361.468	164.701	242.909	213.346	37.7388	86.7931	80.1985
BJN34_05820	histidine phosphatase family protein	1.85713	6.38945	32.6291	1.12e-08	1.99e-07	1.49693	6.38945	21.4828	3.57e-06	9.16e-05	0.360203	6.38945	1.35489	0.244425	0.520577	160.272	151.124	126.996	83.3428	117.212	146.71	17.6892	42.4618	39.4315
BJN34_05825	enoyl-CoA hydratase	1.14679	6.82924	6.8051	0.00908979	0.0286732	1.22342	6.82924	7.72578	0.00544378	0.0399102	-0.0766289	6.82924	0.0315256	0.859073	0.944462	170.527	138.071	145.813	85.9485	176.721	226.769	25.0294	87.8007	58.3239
BJN34_05830	3-hydroxyacyl-CoA dehydrogenase	-0.0504291	7.93735	0.0303437	0.861713	0.916795	0.168952	7.93735	0.341105	0.559192	0.786002	-0.219382	7.93735	0.575788	0.447968	0.700323	124.02	103.292	159.515	126.555	166.627	174.966	87.235	123.348	124.871
BJN34_05835	glutathione S-transferase	0.80112	7.8121	8.35416	0.00384805	0.014001	0.605634	7.8121	4.79388	0.028561	0.129932	0.195486	7.8121	0.507767	0.476107	0.718676	314.289	326.146	459.636	367.878	329.649	302.823	157.584	195.38	173.161
BJN34_05840	methionine aminotransferase	-0.490282	6.23633	4.18523	0.0407776	0.0992074	-0.277059	6.23633	1.35291	0.24477	0.515992	-0.213223	6.23633	0.79491	0.37262	0.641317	48.4103	41.5226	49.6986	50.1289	60.0847	55.8246	47.5977	52.7698	60.9861
BJN34_05845	putative toxin-antitoxin system toxin component, PIN family	-0.594502	5.34445	5.55763	0.0184003	0.0517902	-0.207243	5.34445	0.696352	0.404012	0.672735	-0.387259	5.34445	2.37789	0.123064	0.353126	64.4711	39.4217	51.605	67.7526	67.4507	73.2209	55.0201	65.5389	72.0434
BJN34_05850	peroxide stress protein YaaA	-0.823246	5.87306	7.35322	0.00669429	0.0221564	-0.368617	5.87306	1.5098	0.219169	0.484368	-0.454628	5.87306	2.25609	0.13309	0.367137	34.8784	54.0423	49.6205	61.2177	74.3212	59.9899	77.9843	56.4727	65.4509
BJN34_05855	hypothetical protein	-0.123846	6.69103	0.29056	0.589862	0.723252	-0.271864	6.69103	1.39578	0.237431	0.508184	0.148019	6.69103	0.415594	0.519144	0.748709	80.4866	68.1011	85.1743	74.7823	68.7224	74.3786	62.6292	73.6211	73.8165
BJN34_05860	hypothetical protein	0.764764	6.95254	4.54874	0.032943	0.0833128	1.19531	6.95254	10.9882	0.000916945	0.0100617	-0.430547	6.95254	1.47695	0.224252	0.498146	182.367	184.956	88.5374	161.456	212.081	239.124	90.8391	45.1803	72.9574
BJN34_05865	N-formylglutamate amidohydrolase	-0.490639	5.48391	1.89954	0.16813	0.295991	-0.908962	5.48391	6.39071	0.0114719	0.0678903	0.418323	5.48391	1.3599	0.243556	0.519525	52.124	52.1219	22.6009	30.0314	29.8714	34.8652	28.0716	73.2648	43.209
BJN34_05870	ABC transporter substrate-binding protein	-1.36081	6.14846	34.1467	5.11e-09	9.76e-08	-1.1552	6.14846	25.0895	5.47e-07	1.73e-05	-0.205604	6.14846	0.772631	0.379404	0.647522	46.0038	42.0822	31.6016	40.7358	45.8065	53.4573	68.4136	99.9562	81.8591
BJN34_05875	LysR family transcriptional regulator	0.0142558	5.22158	0.00261171	0.959242	0.976303	-0.172551	5.22158	0.380279	0.537454	0.77387	0.186807	5.22158	0.451883	0.501442	0.735212	31.9365	38.2575	39.4095	38.3312	30.0987	30.9814	19.535	33.4809	36.9944
BJN34_05880	LysR family transcriptional regulator	0.240995	5.61988	1.03599	0.308757	0.460839	0.22578	5.61988	0.91072	0.339923	0.614953	0.0152145	5.61988	0.00426554	0.947926	0.982257	60.007	53.4322	36.4062	57.1634	43.3005	49.4478	27.4231	40.1906	34.6648
BJN34_05885	benzoylformate decarboxylase	-0.00314745	3.22814	1.32e-05	0.997102	0.997967	0.462978	3.22814	0.290219	0.59008	0.804169	-0.466126	3.22814	0.296581	0.586034	0.796225	4.98445	5.24616	2.43433	7.73921	3.81999	6.45946	5.5879	4.23029	0
BJN34_05890	salicylaldehyde dehydrogenase	-0.0359133	3.31095	0.00982672	0.921035	0.954821	0.403384	3.31095	1.313	0.251851	0.524056	-0.439297	3.31095	1.60983	0.204516	0.470767	5.38195	4.74154	4.57634	4.49936	7.29697	8.65558	3.47229	4.99933	3.79858
BJN34_05895	ABC transporter substrate-binding protein	-0.436772	2.91079	0.898429	0.343203	0.495071	0.0625033	2.91079	0.0194917	0.888966	0.958107	-0.499275	2.91079	1.21975	0.26941	0.54627	3.64385	4.51868	5.54516	10.3222	6.22241	4.38981	6.54916	4.40491	4.48756
BJN34_05900	VWA domain-containing protein	0.45759	7.46947	2.50909	0.113192	0.219118	0.141125	7.46947	0.238937	0.624975	0.826462	0.316465	7.46947	1.20864	0.271601	0.54843	166.659	131.665	164.59	105.411	138.862	137.453	58.2666	107.42	115.425
BJN34_05905	GNAT family N-acetyltransferase	0.398633	5.95903	1.32562	0.249585	0.396815	0.13263	5.95903	0.146542	0.701862	0.870913	0.266003	5.95903	0.596935	0.43975	0.694057	103.478	99.1385	110.015	56.0482	122.814	85.4698	42.8244	83.2706	70.9257
BJN34_05910	AAA family ATPase	0.0956162	7.38709	0.112141	0.73772	0.834773	-0.237401	7.38709	0.688764	0.406585	0.674236	0.333017	7.38709	1.35909	0.243696	0.519665	172.431	167.553	194.312	112.187	182.829	139.092	113.094	131.67	168.808
BJN34_05915	cytochrome C	-0.905606	7.83835	6.21428	0.0126724	0.038	-0.994067	7.83835	7.46385	0.00629502	0.0442056	0.0884606	7.83835	0.0600158	0.806471	0.917622	316.629	437.617	569.995	506.948	398.77	399.157	846.306	451.182	739.214
BJN34_05920	cytochrome C	-0.743478	7.74896	4.6664	0.0307584	0.0788489	-0.858476	7.74896	6.19891	0.0127829	0.0736347	0.114998	7.74896	0.112436	0.737387	0.88196	303.225	326.383	516.855	441.284	348.737	320.959	606.79	401.236	581.632
BJN34_05925	3-deoxy-7-phosphoheptulonate synthase	-1.54291	8.18783	35.9063	2.07e-09	4.22e-08	-0.695925	8.18783	7.62132	0.00576824	0.0414738	-0.846987	8.18783	11.1074	0.00085986	0.0119418	129.653	120.374	120.165	206.493	274.618	195.816	242.318	294.261	349.913
BJN34_05930	SAM-dependent methyltransferase	0.182461	3.34405	0.228442	0.632681	0.758123	-0.619014	3.34405	2.43224	0.118863	0.335952	0.801475	3.34405	4.2539	0.0391602	0.177104	13.308	7.87443	7.87126	5.57597	4.41504	6.68351	6.43707	4.58702	9.51008
BJN34_05935	metalloprotease TldD	0.379072	8.8062	3.1296	0.0768826	0.163193	-0.0218364	8.8062	0.0103889	0.918815	0.969548	0.400909	8.8062	3.50796	0.0610746	0.231152	343.354	350.062	265.97	225.09	237.487	275.279	171.296	224.66	203.626
BJN34_05940	carbon-nitrogen hydrolase family protein	0.385487	6.88626	2.63992	0.104209	0.206214	0.140635	6.88626	0.35071	0.553712	0.78179	0.244852	6.88626	1.07919	0.298879	0.575804	166.605	145.457	116.815	103.444	134.647	126.968	91.3299	83.7268	88.4157
BJN34_05945	TIGR02099 family protein	0.313707	7.40731	1.93267	0.164466	0.291095	0.412695	7.40731	3.34857	0.0672633	0.230674	-0.0989879	7.40731	0.195415	0.658447	0.839183	39.524	35.5067	32.666	40.8574	36.6799	40.2155	25.7007	21.1273	23.0479
BJN34_05950	bifunctional glutamine synthetase adenylyltransferase/deadenyltransferase	-0.210825	7.86272	0.83758	0.36009	0.512593	-0.0955077	7.86272	0.172357	0.678026	0.855845	-0.115317	7.86272	0.25139	0.616098	0.813475	69.3605	57.6179	60.471	76.1922	62.9551	69.0378	43.5361	64.7307	70.6952
BJN34_05955	rhombosortase	-0.00328875	5.10571	9.68e-05	0.992151	0.995169	0.196107	5.10571	0.346291	0.55622	0.784275	-0.199396	5.10571	0.361652	0.54759	0.77032	31.9567	46.1339	49.3269	52.1009	49.6853	50.6272	20.7631	51.3266	35.8688
BJN34_05960	MprA protease, GlyGly-CTERM protein-sorting domain-containing form	0.689669	7.47042	6.05967	0.0138303	0.0408363	0.410408	7.47042	2.15296	0.142296	0.373911	0.279261	7.47042	1.00975	0.314962	0.591162	146.139	133.928	75.2258	93.6758	92.2422	107.857	37.8811	69.5037	71.3083
BJN34_05965	hypothetical protein	0.833185	5.76009	8.30516	0.00395327	0.0143537	0.755698	5.76009	6.83626	0.00893255	0.0571089	0.077487	5.76009	0.0757055	0.783204	0.906537	198.124	143.407	85.2085	125.874	131.806	146.838	49.2558	62.9889	79.2765
BJN34_05970	DNA repair protein RecN	0.628921	7.91591	7.92012	0.00488881	0.0170529	0.451106	7.91591	4.08289	0.0433195	0.172916	0.177815	7.91591	0.644234	0.422182	0.683322	171.598	149.236	111.201	136.239	111.342	139.75	58.5938	81.1609	86.9413
BJN34_05975	NAD kinase	0.183426	7.76456	0.783574	0.37605	0.52933	0.207876	7.76456	1.00738	0.315531	0.590603	-0.0244501	7.76456	0.0140573	0.905621	0.961198	228.973	226.79	188.119	215.411	205.028	247.443	152.549	154.059	151.914
BJN34_05980	heat-inducible transcriptional repressor HrcA	-0.190911	7.91848	0.66082	0.416271	0.567039	-0.0997873	7.91848	0.180933	0.670572	0.854125	-0.0911238	7.91848	0.15099	0.697591	0.860967	182.256	177.234	206.671	218.375	201.008	202.981	139.416	194.998	201.952
BJN34_05985	ferrochelatase	0.487781	7.19788	4.62667	0.0314787	0.0803681	0.617699	7.19788	7.42446	0.00643431	0.0449104	-0.129918	7.19788	0.336248	0.562003	0.781224	131.908	144.186	94.4892	135.823	118.308	157.582	58.8262	84.3269	71.04
BJN34_05990	RNA-binding protein	0.526783	5.89905	5.14703	0.0232862	0.0626742	0.377977	5.89905	2.64283	0.104018	0.308579	0.148806	5.89905	0.427388	0.513273	0.745835	168.528	175.385	113.564	129.392	139.615	147.386	66.5668	102.632	87.5349
BJN34_05995	hypothetical protein	-1.4964	6.18295	31.7952	1.71e-08	2.89e-07	-1.63329	6.18295	37.52	9.05e-10	4.23e-08	0.136888	6.18295	0.263622	0.607642	0.807434	256.288	199.334	150.552	217.334	157.598	183.043	370.346	607.229	409.437
BJN34_06000	nucleotide exchange factor GrpE	0.851034	8.21406	3.13332	0.0767074	0.162921	1.66456	8.21406	11.5654	0.000671899	0.00777964	-0.813531	8.21406	2.88101	0.08963	0.291669	403.731	511.897	313.301	437.447	1265.74	428.361	97.0497	216.475	247.809
BJN34_06005	thiol reductase thioredoxin	0.606614	4.812	1.64773	0.199268	0.334399	1.38039	4.812	8.47808	0.00359451	0.0290342	-0.773778	4.812	2.79729	0.0944236	0.300731	56.1297	53.1659	39.2526	56.3559	151.929	43.9104	19.4588	30.4334	28.8815
BJN34_06010	phospholipase	0.216531	5.70052	0.682213	0.408826	0.561187	-0.0804151	5.70052	0.0932252	0.760116	0.897502	0.296946	5.70052	1.29727	0.254712	0.530866	48.355	40.6279	27.5942	29.8271	28.4703	37.5845	29.9803	27.3582	22.396
BJN34_06015	DUF1841 domain-containing protein	-0.530858	5.51439	4.10628	0.0427242	0.102716	-0.822658	5.51439	9.69331	0.0018494	0.0174221	0.2918	5.51439	1.21451	0.270441	0.547365	78.9914	102.491	71.5349	70.2647	59.8411	80.6459	107.277	77.2408	109.754
BJN34_06020	multidrug DMT transporter permease	-0.646088	3.41175	1.84141	0.174786	0.304764	-0.409823	3.41175	0.757485	0.384117	0.65508	-0.236265	3.41175	0.246281	0.619706	0.817301	8.13645	6.14024	7.45101	10.9317	9.21051	6.60388	14.6355	4.64778	8.3987
BJN34_06025	malonic semialdehyde reductase	-2.40982	6.26977	51.5038	7.15e-13	2.55e-11	-1.10438	6.26977	12.0271	0.000524321	0.00638195	-1.30544	6.26977	15.7949	7.06e-05	0.00149931	33.025	29.6189	50.8755	126.239	86.1475	82.8991	169.103	151.343	183.691
BJN34_06030	DDE transposase	-0.646709	5.86925	4.55448	0.0328328	0.0831205	-0.188374	5.86925	0.394642	0.52987	0.768835	-0.458335	5.86925	2.30389	0.12905	0.362199	28.3493	28.0514	30.2723	41.8692	41.0181	39.8562	48.3826	27.2219	33.9095
BJN34_06035	ubiquinone biosynthesis protein	1.05039	4.48076	8.29352	0.00397867	0.0144232	1.27692	4.48076	12.3422	0.000442825	0.00564663	-0.226539	4.48076	0.432372	0.510827	0.744155	36.4186	23.614	27.7985	31.3257	36.9575	37.0158	4.89543	14.3092	15.8436
BJN34_06040	alpha/beta hydrolase	0.616707	4.30166	4.01639	0.04506	0.107436	0.848908	4.30166	7.75325	0.00536159	0.0395353	-0.2322	4.30166	0.637421	0.424646	0.684416	21.3111	16.9261	15.3966	16.6198	24.845	22.6318	7.04099	12.1822	9.27293
BJN34_06045	FAD-containing monooxygenase EthA	0.482515	5.35743	2.40701	0.120793	0.230692	1.06077	5.35743	11.7392	0.000611974	0.00721858	-0.578252	5.35743	3.66003	0.0557325	0.217772	30.2271	19.7005	13.7642	24.9215	29.0889	41.9372	9.78811	13.9779	12.8776
BJN34_06050	TetR family transcriptional regulator	-1.02275	4.88504	7.61766	0.00577993	0.0195794	0.260891	4.88504	0.531987	0.465773	0.72261	-1.28364	4.88504	12.1363	0.000494509	0.0078173	15.6299	15.9391	31.7776	62.9671	47.0449	55.0866	33.687	30.7989	45.0944
BJN34_06055	endonuclease III	-0.614645	4.96608	6.72113	0.00952771	0.0297429	-0.241099	4.96608	1.07741	0.299277	0.574971	-0.373546	4.96608	2.50204	0.113699	0.333958	35.7993	30.4832	30.9625	49.2837	41.0456	38.5069	37.152	43.8762	40.891
BJN34_06060	ferredoxin	-1.05927	5.20304	10.8847	0.000969624	0.00442854	-0.308853	5.20304	0.972272	0.324114	0.598923	-0.750413	5.20304	5.50638	0.0189472	0.108154	22.8635	30.0189	19.6102	39.3488	43.9237	41.2054	52.8032	28.0586	40.1824
BJN34_06065	TetR family transcriptional regulator	-0.3107	6.27282	1.04934	0.305659	0.457648	-0.372384	6.27282	1.50574	0.21979	0.485121	0.0616838	6.27282	0.041384	0.838798	0.934788	99.755	130.065	70.686	115.426	77.0594	99.1953	83.2057	75.5841	142.19
BJN34_06070	polyhydroxyalkanoate depolymerase	0.805139	9.80996	12.1353	0.000494763	0.00250786	0.0462812	9.80996	0.0405171	0.840473	0.936167	0.758858	9.80996	10.8104	0.00100934	0.0134139	973.662	997.398	651.002	522.545	493.78	548.887	325.61	407.07	483.017
BJN34_06075	aromatic amino acid aminotransferase	-1.29482	9.52464	15.1897	9.72e-05	0.000609272	-0.797213	9.52464	5.87942	0.0153189	0.083633	-0.497603	9.52464	2.30286	0.129136	0.362283	265.833	257.142	443.685	434.225	544.962	448.174	579.425	626.339	788.916
BJN34_06080	excinuclease ABC subunit B	0.335227	7.28157	1.75975	0.184655	0.316866	0.324684	7.28157	1.65191	0.1987	0.456924	0.0105423	7.28157	0.00176201	0.966518	0.988607	70.7586	73.483	65.4049	63.2961	87.7877	59.8635	37.3835	49.9604	48.7651
BJN34_06085	hypothetical protein	0.900898	4.17608	7.68904	0.00555573	0.0189404	0.87602	4.17608	7.28258	0.00696265	0.0474071	0.0248781	4.17608	0.00663833	0.935063	0.975792	108.312	78.5759	60.3136	65.7136	85.1439	94.4729	28.0127	30.0628	46.6949
BJN34_06090	hypothetical protein	0.935806	4.39352	9.34384	0.00223736	0.00887766	0.514362	4.39352	2.76221	0.0965147	0.293744	0.421443	4.39352	2.06392	0.150822	0.397068	98.9513	132.959	62.3469	68.0683	70.2869	81.873	37.6747	48.5744	35.2625
BJN34_06095	phosphotyrosine protein phosphatase	-0.46607	4.71986	2.92255	0.0873496	0.180419	-0.196456	4.71986	0.5335	0.465139	0.722369	-0.269614	4.71986	0.989075	0.319968	0.595394	38.8295	40.3893	35.8841	49.6067	47.3426	44.9171	47.2056	32.757	48.7424
BJN34_06100	recombinase	-1.06994	4.91982	11.8074	0.000589951	0.00291149	-0.635999	4.91982	4.33515	0.037333	0.157139	-0.433938	4.91982	1.93251	0.164484	0.414416	5.97942	8.27521	10.1194	12.1879	12.6103	9.49402	11.3837	14.9804	16.5042
BJN34_06105	Fe-S cluster assembly transcriptional regulator IscR	-0.344063	6.19145	1.24422	0.26466	0.412925	-0.215479	6.19145	0.490722	0.483606	0.737552	-0.128584	6.19145	0.17445	0.676187	0.849251	88.2026	81.7711	127.14	118.842	120.246	99.1191	86.1587	93.4284	136.492
BJN34_06110	IscS subfamily cysteine desulfurase	-0.0302834	7.6222	0.0103744	0.918872	0.953149	-0.316101	7.6222	1.12618	0.288593	0.56478	0.285817	7.6222	0.922689	0.33677	0.611058	136.739	135.811	167.994	116.935	143.147	111.841	82.2855	126.019	168.355
BJN34_06115	Fe-S cluster assembly scaffold IscU	0.0468917	7.05904	0.0314113	0.859326	0.91524	-0.327876	7.05904	1.52541	0.216802	0.481442	0.374768	7.05904	2.00096	0.1572	0.403685	332.843	323.165	300.195	235.378	260.335	256.811	153.426	295.386	318.432
BJN34_06120	iron-sulfur cluster assembly protein IscA	0.364892	6.77218	2.21001	0.137118	0.254123	-0.183025	6.77218	0.551152	0.457847	0.717982	0.547917	6.77218	4.98629	0.0255489	0.131964	360.698	362.491	357.425	224.676	278.293	251.089	165.345	251.157	276.704
BJN34_06125	GNAT family acetyltransferase	0.160745	5.53206	0.341049	0.559224	0.696666	-0.222319	5.53206	0.643717	0.422368	0.686753	0.383064	5.53206	1.9422	0.16343	0.412536	181.357	203.898	217.417	126.713	183.421	164.468	109.194	160.136	178.033
BJN34_06130	Fe-S protein assembly co-chaperone HscB	-0.246293	4.79873	0.87779	0.348808	0.501171	-0.265604	4.79873	1.02364	0.311658	0.587914	0.0193109	4.79873	0.00542536	0.941283	0.978302	43.9145	43.0099	42.1003	42.6723	46.7949	40.9495	42.9776	33.9112	48.1005
BJN34_06135	Fe-S protein assembly chaperone HscA	-0.408407	6.79821	2.50362	0.113585	0.219509	-0.450064	6.79821	3.04033	0.0812193	0.261929	0.0416568	6.79821	0.0260504	0.871777	0.950271	44.727	40.2168	54.4945	45.3237	48.8501	45.9338	44.6691	48.7946	59.9758
BJN34_06140	ferredoxin, 2Fe-2S type, ISC system	-0.159828	5.16896	0.281157	0.595944	0.728259	-0.123404	5.16896	0.168441	0.681501	0.85748	-0.036424	5.16896	0.0147488	0.903339	0.959902	79.5541	67.8336	108.902	96.9402	94.499	81.9631	83.1005	74.7952	77.9882
BJN34_06145	Fe-S assembly protein IscX	-0.201768	4.3947	0.678581	0.410076	0.562251	-0.400891	4.3947	2.63154	0.10476	0.310175	0.199123	4.3947	0.654813	0.418397	0.68188	93.192	99.9598	79.689	82.8177	66.6931	93.9125	78.8063	92.4365	83.3933
BJN34_06150	glycine zipper 2TM domain-containing protein	0.757081	4.69653	2.33935	0.126143	0.238767	-1.06432	4.69653	4.38291	0.036301	0.154107	1.8214	4.69653	12.6979	0.000366064	0.00613711	82.6745	48.4152	16.3406	11.7929	10.2176	18.4569	29.0909	22.2828	15.2568
BJN34_06155	lysine--tRNA ligase	-1.8307	8.38729	32.8842	9.78e-09	1.78e-07	-1.17964	8.38729	14.1923	0.000165045	0.0024897	-0.65106	8.38729	4.36454	0.0366944	0.169948	90.4341	79.2595	104.447	127.777	195.576	117.309	284.872	246.164	268.776
BJN34_06160	short-chain dehydrogenase	-1.83462	7.01491	23.0117	1.61e-06	1.71e-05	-0.962591	7.01491	6.67301	0.00978837	0.0608937	-0.872031	7.01491	5.40849	0.020039	0.112531	72.329	50.8202	81.9329	123.903	166.22	96.1695	254.871	144.396	196.756
BJN34_06165	peptide chain release factor 2	-2.09083	9.14929	28.784	8.09e-08	1.13e-06	-1.09138	9.14929	8.31733	0.00392685	0.0312165	-0.999446	9.14929	6.9708	0.00828505	0.0628179	158.654	170.98	279.462	411.218	516.244	343.37	850.619	520.314	776.74
BJN34_06170	peptidase	0.0303858	6.03486	0.0155552	0.900745	0.940954	0.523482	6.03486	4.6903	0.0303334	0.136396	-0.493096	6.03486	4.22138	0.0399178	0.179125	84.4731	62.9282	64.7925	94.1804	114.417	94.8489	54.8846	52.5503	61.075
BJN34_06175	single-stranded-DNA-specific exonuclease RecJ	-0.438032	6.59496	3.89085	0.04855	0.113606	-0.326203	6.59496	2.1724	0.140507	0.370899	-0.111829	6.59496	0.254223	0.614117	0.811478	47.6332	38.7273	42.5655	50.6195	47.7355	44.3851	45.2067	50.4832	47.2033
BJN34_06180	hypothetical protein	-0.574188	6.18425	5.12838	0.0235377	0.0631932	-0.192023	6.18425	0.584548	0.444535	0.70689	-0.382165	6.18425	2.287	0.130462	0.363509	53.9887	36.017	44.3568	66.7358	57.0962	55.3086	53.8815	47.9159	61.1105
BJN34_06185	cell division protein FtsX	-0.435254	6.20342	3.41338	0.0646697	0.142922	-0.164026	6.20342	0.491771	0.483138	0.737002	-0.271228	6.20342	1.3355	0.247829	0.52444	50.3756	42.2338	37.015	48.0822	49.9168	61.2946	50.4457	41.5507	49.0294
BJN34_06190	lipoprotein releasing system, ATP-binding protein	0.079966	5.8377	0.121043	0.727906	0.827508	0.400495	5.8377	3.08144	0.0791906	0.257788	-0.320529	5.8377	2.0157	0.155679	0.402159	73.2604	71.5453	45.2019	85.0271	80.2736	73.8046	42.6765	52.819	49.45
BJN34_06195	TatD family deoxyribonuclease	-0.000628659	5.59843	7.52e-06	0.997812	0.998389	0.612167	5.59843	7.41299	0.00647544	0.045152	-0.612795	5.59843	7.58051	0.00590028	0.0494358	51.4611	40.7915	32.439	68.9244	59.4502	64.9195	33.1937	32.0209	35.0653
BJN34_06200	DNA internalization-related competence protein ComEC/Rec2	0.225181	3.38953	0.389652	0.532483	0.672529	-0.0699628	3.38953	0.0366112	0.848259	0.939698	0.295144	3.38953	0.69129	0.405726	0.670124	4.92804	3.98941	3.14285	4.1494	3.23511	2.55914	2.90001	1.82687	3.49135
BJN34_06205	SIS domain-containing protein	1.65113	6.91113	14.4522	0.000143758	0.000853673	0.00289247	6.91113	4.61e-05	0.994585	0.996581	1.64824	6.91113	14.4535	0.000143665	0.00280207	305.816	265.248	67.3541	69.4923	48.6795	82.8115	46.7497	56.5159	55.809
BJN34_06210	phosphogluconate dehydratase	1.35688	8.15807	10.6581	0.00109592	0.00490825	-0.579204	8.15807	1.98506	0.158858	0.400996	1.93608	8.15807	20.9685	4.67e-06	0.000124818	354.687	292.339	95.9818	63.6324	48.5862	80.1632	91.5857	76.8483	55.9378
BJN34_06215	gluconate kinase	1.31149	6.48923	9.34176	0.0022399	0.00888264	-0.249377	6.48923	0.343178	0.558001	0.785042	1.56087	6.48923	13.091	0.000296715	0.00512333	341.052	344.783	132.75	98.7004	69.9725	108.388	127.593	72.9433	52.2778
BJN34_06220	circularly permuted type 2 ATP-grasp protein	0.697853	7.17912	2.55938	0.109641	0.21439	0.0641455	7.17912	0.0217613	0.882724	0.956043	0.633708	7.17912	2.11886	0.145495	0.386925	153.318	139.453	57.4249	84.117	48.422	93.4596	27.3133	93.5373	54.0313
BJN34_06225	alpha-E domain-containing protein	1.29256	5.7353	10.9805	0.000920758	0.00425008	0.215236	5.7353	0.307213	0.579396	0.79772	1.07732	5.7353	7.7933	0.00524405	0.045501	94.1839	97.3064	44.2347	40.2168	27.7979	43.8201	16.6566	43.03	17.7869
BJN34_06230	transglutaminase	-0.0128969	5.65448	0.0019407	0.964862	0.979719	-0.105246	5.65448	0.129082	0.719386	0.880975	0.092349	5.65448	0.100349	0.751412	0.888904	52.8171	49.4341	50.6246	49.186	55.0257	42.2791	50.8078	30.3822	43.2449
BJN34_06235	peptidase	-0.0373065	6.18216	0.027823	0.867526	0.919447	0.311904	6.18216	1.97284	0.160147	0.402681	-0.349211	6.18216	2.49959	0.113876	0.333958	66.8781	81.4549	60.5877	79.3707	88.4454	104.055	54.2948	60.0495	59.927
BJN34_06240	alpha/beta hydrolase	0.547678	6.09375	5.51532	0.0188506	0.0528001	0.316659	6.09375	1.83678	0.175329	0.425063	0.231018	6.09375	1.01401	0.313944	0.590322	89.89	100.658	70.9556	66.5456	68.2576	91.999	43.4127	56.2635	45.4712
BJN34_06245	CTP synthase	-0.989802	9.84218	10.1276	0.00146062	0.00624664	-0.599817	9.84218	3.76704	0.0522722	0.195133	-0.389985	9.84218	1.59678	0.20636	0.472969	303.427	285.571	408.495	430.335	481.288	445.675	650.548	443.997	527.011
BJN34_06250	3-deoxy-8-phosphooctulonate synthase	-0.885548	8.67913	12.0609	0.000514912	0.00259291	-0.507731	8.67913	4.01504	0.0450961	0.177513	-0.377817	8.67913	2.21973	0.136257	0.371697	315.517	253.291	316.623	386.789	423.489	371.681	475.986	410.844	448.332
BJN34_06255	DUF1330 domain-containing protein	-0.666779	6.63975	6.4228	0.0112664	0.0343046	-0.383255	6.63975	2.1488	0.142682	0.374641	-0.283524	6.63975	1.16694	0.28003	0.557805	260.467	237.046	203.827	275.298	309.066	281.598	365.631	263.544	261.281
BJN34_06260	phosphopyruvate hydratase	-1.11755	10.3233	20.5863	5.7e-06	5.21e-05	-0.984907	10.3233	16.0807	6.07e-05	0.00106671	-0.132644	10.3233	0.296565	0.586044	0.796225	571.446	619.023	628.537	629.466	778.043	633.339	1008.93	1120.01	1109.41
BJN34_06265	cell division protein FtsB	-0.558797	5.658	6.67667	0.0097683	0.0303844	-0.347501	5.658	2.6331	0.104657	0.310075	-0.211296	5.658	0.955844	0.328236	0.603	108.666	113.51	94.7201	128.237	114.253	131.892	126.607	116.47	135.056
BJN34_06270	hypothetical protein	1.11844	5.16495	17.3635	3.09e-05	0.000224289	1.06147	5.16495	15.6459	7.64e-05	0.00131881	0.0569723	5.16495	0.0506469	0.821941	0.927179	110.965	96.4924	65.9191	71.4168	91.9401	101.025	33.6006	35.8496	30.7018
BJN34_06275	Hsp33 chaperonin	-0.207613	6.9935	0.262476	0.608424	0.737522	0.39643	6.9935	0.959066	0.327422	0.60135	-0.604043	6.9935	2.21925	0.1363	0.371697	91.2847	95.8141	83.718	92.7822	231.161	87.6549	74.8359	71.1214	109.364
BJN34_06280	gamma carbonic anhydrase family protein	-0.347335	6.25454	0.5383	0.463138	0.610116	0.499626	6.25454	1.11942	0.290044	0.565119	-0.846961	6.25454	3.18706	0.0742234	0.2618	70.9329	108.193	96.992	98.3838	305.685	94.8079	97.2043	87.9882	102.666
BJN34_06285	DUF455 domain-containing protein	-0.712094	5.15178	8.3902	0.00377249	0.0137768	-0.296025	5.15178	1.50862	0.219349	0.484612	-0.416069	5.15178	2.87687	0.0898605	0.291669	22.1653	29.1115	28.8527	36.7791	36.147	37.0796	32.8148	37.8434	37.3561
BJN34_06290	AMP-binding protein	0.495337	6.82878	4.7168	0.0298693	0.077026	0.245337	6.82878	1.1553	0.282443	0.558412	0.250001	6.82878	1.2244	0.268499	0.545767	73.1854	71.2628	56.5297	63.7696	48.5996	59.9673	29.9669	48.3914	38.0454
BJN34_06295	alpha/beta hydrolase	-0.875466	4.88978	10.0509	0.00152277	0.00646848	-0.288602	4.88978	1.15303	0.282916	0.558412	-0.586864	4.88978	4.54002	0.0331111	0.158263	20.9685	17.4047	19.6069	23.1982	31.2971	35.1258	22.3061	33.1921	32.5922
BJN34_06300	ferredoxin-NADP reductase	0.869368	6.20437	15.1997	9.67e-05	0.000607463	-0.252034	6.20437	1.23664	0.26612	0.541255	1.1214	6.20437	25.2077	5.15e-07	1.54e-05	95.7301	88.767	82.4957	40.8187	44.187	39.6638	30.897	46.6977	42.0012
BJN34_06305	phosphatase	-0.573128	7.85308	3.89795	0.0483451	0.113356	-0.763862	7.85308	6.88523	0.00869109	0.0560061	0.190734	7.85308	0.432569	0.510731	0.744155	199.216	157.139	267.582	209.527	165.034	198.285	210.099	303.933	264.616
BJN34_06310	threonylcarbamoyl-AMP synthase	-0.198308	5.85864	0.454176	0.500358	0.646231	0.08514	5.85864	0.0845534	0.771219	0.900796	-0.283448	5.85864	0.93888	0.332566	0.606542	90.9498	76.9416	50.1121	66.7202	85.1027	115.619	74.7926	67.0891	56.794
BJN34_06315	site-2 protease family protein	-0.19312	6.669	0.757502	0.384111	0.537399	-0.232927	6.669	1.10242	0.293735	0.568583	0.0398062	6.669	0.0322843	0.857405	0.943581	128.553	119.648	132.42	138.258	113.372	130.373	99.9935	126.544	132.173
BJN34_06320	SAM-dependent methyltransferase	-0.0848963	6.47868	0.16543	0.684205	0.79554	-0.191546	6.47868	0.840202	0.359339	0.632137	0.10665	6.47868	0.262398	0.608477	0.807571	148.739	136.107	119.181	125.706	111.791	145.786	98.7042	130.06	120.642
BJN34_06325	4-hydroxy-tetrahydrodipicolinate synthase	-0.486199	9.23377	4.70919	0.0300017	0.0772954	-0.266059	9.23377	1.41664	0.233957	0.503394	-0.22014	9.23377	0.969138	0.324895	0.599247	496.361	503.946	494.304	599.44	600.302	583.819	521.437	534.913	657.832
BJN34_06330	outer membrane protein assembly factor BamC	-0.465034	9.43859	3.70448	0.0542666	0.124542	-0.244583	9.43859	1.02894	0.310408	0.587022	-0.220451	9.43859	0.835411	0.360712	0.633526	385.717	380.177	447.72	475.712	499.462	483.385	411.334	446.866	524.984
BJN34_06335	MBL fold metallo-hydrolase	-0.483754	6.45412	3.44732	0.0633546	0.140598	0.0994121	6.45412	0.148514	0.699959	0.869175	-0.583167	6.45412	5.0523	0.0245933	0.128905	68.2106	70.9569	81.0909	130.259	105.078	105.872	92.6311	73.2876	85.4781
BJN34_06340	hypothetical protein	-1.49339	9.56868	19.5079	1e-05	8.63e-05	-1.04839	9.56868	9.82765	0.00171908	0.0164178	-0.445001	9.56868	1.7972	0.180051	0.43741	1501.35	1238.34	1881.22	2503.8	2044.95	1998.41	4609.89	2784.92	3193.66
BJN34_06345	cupin	-0.508656	6.69669	3.71151	0.0540384	0.1241	-0.210684	6.69669	0.643728	0.422364	0.686753	-0.297972	6.69669	1.28026	0.257851	0.533899	75.3305	67.3048	55.8577	81.8581	85.932	79.4716	82.0516	54.9911	89.6932
BJN34_06350	peptidylprolyl isomerase	-0.773156	8.67099	9.80764	0.00173788	0.00720114	-0.491829	8.67099	4.00417	0.0453879	0.178054	-0.281327	8.67099	1.30997	0.252399	0.529099	487.458	556.339	498.928	670.385	635.94	613.901	785.162	591.048	759.421
BJN34_06355	hypothetical protein	-0.120359	5.8331	0.267094	0.605288	0.735759	0.312925	5.8331	1.84451	0.174423	0.423906	-0.433284	5.8331	3.5629	0.0590844	0.225524	46.3007	43.0099	35.1726	62.3151	52.0881	56.5847	37.3949	41.5414	30.1344
BJN34_06360	DNA mismatch repair protein MutS	-0.285695	8.33319	1.92953	0.16481	0.291405	0.201999	8.33319	0.970848	0.324469	0.598939	-0.487694	8.33319	5.63759	0.0175794	0.103321	93.3772	88.0337	79.0917	136.424	113.071	123.796	78.1693	88.4101	92.0101
BJN34_06365	DUF465 domain-containing protein	-0.302115	6.37994	0.559268	0.454555	0.601097	0.380032	6.37994	0.890507	0.34534	0.618823	-0.682147	6.37994	2.85248	0.0912329	0.294635	341.861	377.703	95.9219	427.714	331.872	540.6	218.217	344.302	231.215
BJN34_06370	inositol monophosphatase	-2.08203	7.33789	19.3812	1.07e-05	9.12e-05	-1.0527	7.33789	5.27392	0.0216472	0.10822	-1.02932	7.33789	4.99738	0.0253857	0.131565	55.3311	61.1803	93.8067	168.709	161.634	118.472	373.426	123.389	226.166
BJN34_06375	RNA methyltransferase	0.362792	6.5452	2.1474	0.142812	0.262235	0.0934509	6.5452	0.14206	0.706242	0.873505	0.269341	6.5452	1.19921	0.273479	0.550616	112.095	109.227	115.939	96.0047	86.2334	105.686	62.8917	59.5797	92.7443
BJN34_06380	serine O-acetyltransferase	0.0668698	6.47566	0.069187	0.792524	0.871355	-0.115886	6.47566	0.207131	0.649026	0.84265	0.182756	6.47566	0.519637	0.470997	0.716073	108.341	105.556	113.228	101.318	103.927	90.5351	96.3924	73.4683	83.5091
BJN34_06385	UDP-2,3-diacylglucosamine diphosphatase	-1.10412	6.00746	9.38641	0.002186	0.00870713	-0.4337	6.00746	1.49571	0.221333	0.486699	-0.670419	6.00746	3.49906	0.0614036	0.231694	37.3594	44.8733	48.4611	79.0376	65.4274	71.482	111.675	55.3933	58.5996
BJN34_06390	cyclophilin	-1.03396	9.17252	14.8386	0.000117117	0.00071258	-0.667489	9.17252	6.26844	0.0122907	0.0717546	-0.366467	9.17252	1.89507	0.168631	0.420909	627.875	622.929	806.835	908.817	938.119	902.579	1246.55	1119.97	1095.7
BJN34_06395	peptidylprolyl isomerase	-0.821398	8.14429	10.9565	0.000932755	0.004297	-0.370968	8.14429	2.26772	0.132094	0.356995	-0.450431	8.14429	3.32185	0.068365	0.248744	289.132	295.275	326.878	426.298	453.303	399.809	460.637	387.51	467.181
BJN34_06400	tetratricopeptide repeat protein	-0.409458	6.28484	2.66379	0.102656	0.204016	-0.0257095	6.28484	0.0106689	0.917732	0.969533	-0.383748	6.28484	2.36137	0.124373	0.354971	86.3078	80.6081	67.4462	94.7487	105.606	110.394	83.9933	64.2035	103.231
BJN34_06405	cysteine--tRNA ligase	-0.522005	8.22108	4.2108	0.0401673	0.097998	-0.334203	8.22108	1.73471	0.187811	0.444734	-0.187801	8.22108	0.547408	0.459379	0.708721	147.459	142.773	175.514	189.631	179.683	179.746	195.172	159.836	193.207
BJN34_06410	Fe-S cluster assembly protein HesB	-0.570178	7.02587	6.13854	0.0132266	0.0393898	-0.425553	7.02587	3.444	0.0634818	0.222556	-0.144625	7.02587	0.39604	0.529142	0.757448	106.162	102.68	118.061	131.38	109.718	132.746	126.141	145.01	128.063
BJN34_06415	acetyl-CoA carboxylase carboxyltransferase subunit alpha	-0.677706	9.06177	6.77715	0.00923324	0.0289936	-0.37052	9.06177	2.04149	0.15306	0.391209	-0.307186	9.06177	1.40192	0.236402	0.512155	378.052	388.752	358.081	462.611	501.308	456.688	539.565	372.196	542.762
BJN34_06420	tRNA lysidine(34) synthetase TilS	0.108433	5.37046	0.217513	0.640941	0.763588	0.154364	5.37046	0.443326	0.505521	0.752682	-0.0459305	5.37046	0.0403877	0.840724	0.935739	32.3783	28.9494	21.239	31.1801	27.3733	27.7704	21.2258	18.598	21.4705
BJN34_06425	aspartate kinase	-2.03277	9.82792	23.6275	1.17e-06	1.29e-05	-0.921733	9.82792	5.16079	0.0231024	0.113127	-1.11103	9.82792	7.42701	0.0064252	0.0526486	181.403	191.672	385.508	597.368	681.947	447.126	924.606	673.243	1011.13
BJN34_06435	LysR family transcriptional regulator	0.291753	6.23073	1.38499	0.239252	0.384587	-0.212786	6.23073	0.727142	0.393811	0.664089	0.504539	6.23073	4.14938	0.0416497	0.183154	87.7707	73.5544	76.4696	51.1833	61.3926	58.4061	58.6386	53.2221	45.2016
BJN34_06440	aldehyde oxidase	0.213132	3.03703	0.270891	0.602735	0.733898	-0.095813	3.03703	0.0532064	0.817575	0.924076	0.308945	3.03703	0.585269	0.444254	0.697457	8.9446	10.0167	3.87185	5.8083	5.09858	7.44099	3.0514	5.3434	7.469
BJN34_06445	cupin domain-containing protein	0.0872202	2.73452	0.0591137	0.807902	0.881974	-0.318884	2.73452	0.741168	0.389287	0.660194	0.406104	2.73452	1.28551	0.256876	0.533433	8.42767	5.97085	5.30495	5.02088	4.43523	5.72786	5.58136	5.43536	3.70312
BJN34_06450	2,5-diketo-D-gluconic acid reductase	0.447768	2.81426	1.10283	0.293646	0.444708	-0.427113	2.81426	0.910497	0.339983	0.614953	0.874881	2.81426	4.14673	0.0417149	0.183154	10.0578	10.6596	5.3639	5.18226	4.19854	4.71539	3.1859	3.49693	8.57227
BJN34_06455	zinc-ribbon domain-containing protein	0.893925	6.19585	4.97224	0.0257572	0.0679179	0.448388	6.19585	1.25867	0.261904	0.536992	0.445538	6.19585	1.26275	0.261131	0.538436	31.3391	29.2372	14.6262	18.2242	14.3285	22.955	6.52393	18.8796	7.41396
BJN34_06460	adenylate/guanylate cyclase domain-containing protein	0.509884	5.47782	1.42821	0.232057	0.375412	0.0425179	5.47782	0.00990529	0.920721	0.970714	0.467366	5.47782	1.20974	0.271383	0.548373	69.8153	61.3753	26.848	37.1331	22.7841	55.2702	15.5661	45.0823	29.1493
BJN34_06470	pyruvate carboxylase	0.677669	4.95439	4.72146	0.0297884	0.0768461	0.102689	4.95439	0.10639	0.744292	0.89025	0.574981	4.95439	3.48811	0.061811	0.233104	12.9764	10.8899	6.21663	6.48435	6.94264	6.7429	3.27987	7.06584	4.83139
BJN34_06475	porin	1.98289	1.11644	6.67179	0.00979508	0.0304404	0.418213	1.11644	0.236096	0.62704	0.827434	1.56468	1.11644	4.88624	0.0270716	0.137624	1.92375	1.59268	2.92386	1.41204	0.442494	0.459374	0	0.916876	0.474066
BJN34_06480	6-chlorohydroxyquinol-1,2-dioxygenase	2.54159	3.68816	3.98852	0.0458113	0.108853	0.315502	3.68816	0.0672043	0.795452	0.913536	2.22609	3.68816	3.1565	0.0756253	0.264841	27.6473	22.5063	27.7884	9.71049	6.8627	0	4.0721	6.54693	0
BJN34_06485	5-methylthioadenosine deaminase	3.11735	3.46124	28.4422	9.65e-08	1.33e-06	-0.164674	3.46124	0.0695474	0.791997	0.910966	3.28202	3.46124	31.9002	1.62e-08	5.88e-07	12.8073	15.4577	19.3899	1.76363	1.42565	1.60609	2.5336	1.46209	0.19285
BJN34_06490	GMC family oxidoreductase	4.00141	2.73385	12.3505	0.00044088	0.0022781	0.0183023	2.73385	0.000259787	0.98714	0.992905	3.98311	2.73385	12.5412	0.000398079	0.00659401	6.71692	9.28256	8.38507	0	1.45148	0	0.579721	0.599101	0
BJN34_06495	NAD(P)-dependent oxidoreductase	2.08663	2.1169	18.5337	1.67e-05	0.000132246	-0.961498	2.1169	2.25072	0.133553	0.358418	3.04813	2.1169	34.3369	4.64e-09	1.76e-07	10.3275	7.81532	5.70105	1.16281	0.541725	1.15539	1.09352	2.41466	0.627435
BJN34_06500	YciI family protein	2.86533	2.32084	27.4101	1.65e-07	2.15e-06	-5.33976	2.32084	17.7549	2.51e-05	0.000516259	8.20509	2.32084	74.4194	6.32e-18	4.7e-16	35.667	39.2939	24.4401	0	0	0	1.4136	6.91548	1.43953
BJN34_06505	YciI family protein	4.07624	0.850639	12.8621	0.000335299	0.0017983	2.17286	0.850639	2.8693	0.0902841	0.280591	1.90338	0.850639	4.87685	0.0272193	0.138172	4.969	13.5468	1.38048	2.37035	1.45924	1.05817	0	0.531181	0
BJN34_06510	long-chain fatty acid--CoA ligase	3.79829	2.30018	22.3563	2.26e-06	2.3e-05	0.938791	2.30018	1.15605	0.282287	0.558412	2.8595	2.30018	15.7092	7.39e-05	0.00154981	7.19716	2.76336	7.92976	0.525412	0.489556	1.53844	0.491853	0	0.34966
BJN34_06515	GntR family transcriptional regulator	-0.363424	5.86961	0.441758	0.506275	0.651934	0.0106855	5.86961	0.000384361	0.984358	0.992108	-0.374109	5.86961	0.469246	0.493334	0.728791	32.805	21.3646	98.0969	79.6607	65.1292	70.416	33.498	71.26	68.2264
BJN34_06520	quercetin 2,3-dioxygenase	1.27405	5.78457	10.2076	0.00139866	0.00601138	0.635514	5.78457	2.56891	0.108983	0.317214	0.638533	5.78457	2.67147	0.102162	0.315162	80.6798	82.1459	74.8101	49.6506	40.7414	66.5724	9.835	43.3394	28.9075
BJN34_06525	porin	-0.450842	2.83089	0.799503	0.371242	0.523946	-0.0405219	2.83089	0.00672616	0.934636	0.974805	-0.41032	2.83089	0.677654	0.410396	0.673839	5.65664	5.05654	1.39461	6.20724	6.54088	3.16298	3.20987	6.39763	3.55124
BJN34_06530	3-oxoacyl-ACP reductase	0.940996	4.09831	9.41933	0.0021471	0.00857849	0.315345	4.09831	1.01009	0.314881	0.590051	0.625652	4.09831	4.505	0.0337959	0.160937	24.179	30.4028	18.1322	13.5911	17.6343	15.8996	10.4575	8.07727	11.4356
BJN34_06535	dehydratase	0.302776	2.16347	0.290659	0.589799	0.723252	-0.314258	2.16347	0.295108	0.586966	0.802612	0.617034	2.16347	1.20983	0.271365	0.548373	7.41955	8.10862	12.6587	1.77873	9.33811	7.78739	5.44153	5.69382	7.32193
BJN34_06540	acyl dehydratase	0.368576	2.11701	0.445397	0.504529	0.650169	0.0352658	2.11701	0.00395742	0.94984	0.980279	0.333311	2.11701	0.383809	0.535572	0.761226	12.5117	7.52491	5.42792	2.07889	7.28878	10.0348	5.64217	4.85866	4.4827
BJN34_06545	lipid-transfer protein	1.37125	3.09258	16.3712	5.21e-05	0.000352436	0.427122	3.09258	1.37778	0.24048	0.512119	0.944123	3.09258	9.08466	0.00257762	0.0272065	8.23691	10.6799	8.24559	5.21447	4.95258	4.05656	2.29809	2.96352	3.03198
BJN34_06550	acyl-CoA dehydrogenase	1.39289	2.48485	5.60444	0.017915	0.0507752	0.604812	2.48485	1.01236	0.314338	0.589878	0.788075	2.48485	2.01329	0.155927	0.402249	4.86867	3.37315	8.27752	1.93808	2.46054	5.50314	1.50001	1.23304	2.4623
BJN34_06555	helix-turn-helix transcriptional regulator	0.461695	7.51183	3.02481	0.0819999	0.172051	0.24969	7.51183	0.885687	0.346649	0.620366	0.212004	7.51183	0.644351	0.42214	0.683322	71.7103	62.5797	59.1764	62.474	46.8562	61.8823	24.2082	51.9045	39.958
BJN34_06560	hypothetical protein	0.0344006	3.99229	0.00843873	0.926807	0.958795	0.649311	3.99229	3.12637	0.0770349	0.253151	-0.61491	3.99229	2.87959	0.0897088	0.291669	5.18494	3.98634	3.13705	9.69676	3.73297	6.02431	2.81472	3.59757	3.43345
BJN34_06565	ABC transporter substrate-binding protein	0.330745	3.91368	1.21391	0.27056	0.419332	0.285961	3.91368	0.90849	0.340515	0.615274	0.0447846	3.91368	0.0239982	0.87689	0.951258	15.5684	13.9831	12.5386	12.7787	11.8151	17.1768	5.82729	10.8718	10.5999
BJN34_06570	carnitine dehydratase	0.23834	2.31113	0.369433	0.543314	0.682865	0.158341	2.31113	0.161957	0.687361	0.861254	0.0799992	2.31113	0.0467091	0.828892	0.930035	3.23384	4.16697	2.96571	3.4935	2.74455	3.65643	2.72469	2.61842	1.64093
BJN34_06575	hypothetical protein	0.393533	3.15145	0.989485	0.319868	0.472276	0.548395	3.15145	1.96174	0.161327	0.403842	-0.154862	3.15145	0.171029	0.679199	0.851335	10.7711	12.8343	8.16565	16.2843	8.51329	11.3978	4.16935	5.86234	9.66956
BJN34_06585	DNA-binding protein	0.35276	4.69623	1.90613	0.167393	0.295069	0.320936	4.69623	1.58082	0.208643	0.470092	0.031824	4.69623	0.0165363	0.897679	0.957089	59.4296	62.0718	53.2835	68.3578	44.7839	62.4857	29.5221	44.1712	38.3594
BJN34_06590	acetyl-CoA acetyltransferase	0.176315	5.98411	0.590967	0.442045	0.589507	0.308283	5.98411	1.81969	0.17735	0.428164	-0.131968	5.98411	0.341115	0.559186	0.779066	47.613	44.5408	48.3578	51.9296	51.3286	54.895	27.9417	41.2973	33.4334
BJN34_06595	CoA transferase	N/A	N/A	N/A	N/A	N/A	N/A	N/A	N/A	N/A	N/A	N/A	N/A	N/A	N/A	N/A	0.947666	0	0.398204	0	0	0	0	0.410822	0
BJN34_06605	transposase	-0.387293	5.81958	2.97305	0.0846619	0.176036	0.0129736	5.81958	0.00342245	0.953349	0.981446	-0.400266	5.81958	3.23023	0.0722904	0.257856	30.3059	33.2534	24.7925	41.8074	37.0087	39.809	28.8312	27.5451	37.2135
BJN34_06610	hypothetical protein	1.73119	0.913852	3.9766	0.0461365	0.109438	1.60981	0.913852	3.39156	0.0655311	0.227437	0.121384	0.913852	0.0294983	0.863633	0.94647	2.86928	5.2009	2.24003	6.19351	2.50634	1.16033	1.24795	1.29832	0
BJN34_06615	MaoC family dehydratase	0.992377	2.89001	1.8326	0.175821	0.30603	0.780725	2.89001	1.13357	0.287015	0.56409	0.211652	2.89001	0.0892271	0.765162	0.896224	6.69656	9.3611	5.05745	7.40922	5.86171	5.11036	4.56577	0	3.65668
BJN34_06620	CoA ester lyase	0.447304	2.79289	0.954312	0.328624	0.480243	0.561909	2.79289	1.53374	0.215552	0.479436	-0.114605	2.79289	0.0700857	0.791212	0.911236	7.46835	3.31932	6.4714	4.84705	5.00538	9.34104	3.56267	3.61399	2.66302
BJN34_06625	GntR family transcriptional regulator	-0.572754	5.15651	3.18198	0.0744546	0.159112	0.0160284	5.15651	0.00257243	0.959549	0.983993	-0.588783	5.15651	3.40781	0.0648885	0.240776	36.3753	23.3028	27.2388	48.225	41.3978	44.3822	42.6413	22.8062	38.409
BJN34_06630	LysR family transcriptional regulator	0.418711	4.7409	1.35199	0.244931	0.391031	0.600586	4.7409	2.79766	0.094402	0.289098	-0.181875	4.7409	0.267143	0.605255	0.80654	37.6036	29.4492	11.6583	32.7949	24.1198	31.5729	13.8845	13.4424	18.7905
BJN34_06635	fatty-acid--CoA ligase	-0.479185	3.60716	2.10369	0.146944	0.267819	0.276157	3.60716	0.772895	0.379323	0.650511	-0.755342	3.60716	5.60481	0.0179113	0.104763	4.42021	3.93407	5.51643	8.95229	6.52582	9.15229	5.60596	4.96411	5.31256
BJN34_06640	IclR family transcriptional regulator	-0.614975	6.04814	6.63476	0.0100008	0.0309552	-0.296508	6.04814	1.57323	0.209739	0.471504	-0.318467	6.04814	1.78792	0.181179	0.439246	57.8709	59.7531	60.9208	85.3227	63.1873	81.6728	76.7263	66.1364	80.3061
BJN34_06645	IS110 family transposase	N/A	N/A	N/A	N/A	N/A	N/A	N/A	N/A	N/A	N/A	N/A	N/A	N/A	N/A	N/A	0.302262	0.281607	0.111027	0.072125	0.27825	0.303036	0.237734	0.149194	0.223534
BJN34_06650	ABC transporter substrate-binding protein	-1.02963	3.6852	8.84251	0.00294294	0.0111961	-0.558508	3.6852	2.77218	0.0959155	0.292435	-0.471118	3.6852	1.81726	0.17764	0.433244	2.99795	6.0407	4.24234	5.89459	5.27061	7.766	6.27832	7.03082	9.0174
BJN34_06655	ABC transporter permease	-0.556928	2.23062	1.01428	0.31388	0.466375	-0.295282	2.23062	0.295697	0.586592	0.802612	-0.261646	2.23062	0.225409	0.634949	0.824683	3.01015	4.11412	1.59071	2.85672	3.52527	4.38225	5.08272	3.808	1.34322
BJN34_06660	peptide ABC transporter permease	-0.44608	2.57171	0.283901	0.594156	0.727229	0.358325	2.57171	0.189021	0.663733	0.849637	-0.804405	2.57171	0.940157	0.332238	0.606456	4.19633	2.94058	3.3649	3.59765	8.02928	6.91648	5.81952	5.36027	0
BJN34_06665	methionine ABC transporter ATP-binding protein	-0.351421	3.17888	0.486554	0.485469	0.631839	0.508685	3.17888	1.08349	0.297918	0.573474	-0.860105	3.17888	3.06987	0.0797557	0.2719	4.8531	5.79404	5.40961	10.5034	11.0739	9.02936	7.67326	1.72922	7.20315
BJN34_06670	ABC transporter ATP-binding protein	-0.328377	3.34706	0.557854	0.455126	0.601736	0.280426	3.34706	0.428906	0.512526	0.758539	-0.608803	3.34706	2.00529	0.156751	0.403474	2.66057	9.73779	7.57995	9.96407	9.3574	12.6202	5.66394	7.88388	7.16704
BJN34_06675	porin	-1.36818	2.8315	0.979916	0.32222	0.474893	-0.603766	2.8315	0.197805	0.656498	0.846757	-0.764414	2.8315	0.312579	0.576102	0.790984	0	2.1078	6.38143	5.07179	7.96885	2.98868	10.8231	8.12388	0
BJN34_06680	N-formylglutamate amidohydrolase	-0.16458	2.72632	0.115413	0.734064	0.832309	-0.108841	2.72632	0.0510997	0.821161	0.926143	-0.0557385	2.72632	0.0135419	0.90736	0.962053	2.59022	7.04059	7.1496	7.5124	4.01808	6.75054	3.13483	6.21825	6.59181
BJN34_06685	FAD-binding oxidoreductase	-0.379927	5.77756	2.51755	0.112586	0.218543	-0.200882	5.77756	0.71305	0.398433	0.668399	-0.179045	5.77756	0.563203	0.452972	0.705843	27.6967	27.3698	31.5237	33.9812	31.0699	36.3307	31.9612	31.8898	28.3661
BJN34_06690	DUF2069 domain-containing protein	-0.609571	3.87404	2.26756	0.132108	0.247555	-0.238909	3.87404	0.359102	0.549005	0.779597	-0.370662	3.87404	0.845444	0.357844	0.630714	19.724	32.748	18.3129	23.6812	40.7274	27.9389	38.1932	22.9179	25.211
BJN34_06695	NAD(P)H:quinone oxidoreductase, type IV	-0.63467	5.20579	3.62961	0.05676	0.128812	-0.228159	5.20579	0.47986	0.488486	0.740914	-0.406511	5.20579	1.49941	0.220762	0.493915	30.2373	47.6952	42.9276	57.0178	61.4244	45.7771	64.5198	42.1796	44.7821
BJN34_06700	hypothetical protein	-0.346466	5.84135	2.29291	0.129966	0.244733	-0.354728	5.84135	2.4091	0.120632	0.338678	0.00826129	5.84135	0.00130361	0.971198	0.989636	38.1078	32.0231	31.4012	36.9996	33.0651	32.8343	37.2309	35.8535	31.611
BJN34_06705	DUF962 domain-containing protein	0.623219	3.71336	2.4294	0.119078	0.22814	0.0796135	3.71336	0.038546	0.844351	0.938398	0.543605	3.71336	1.91639	0.166256	0.416934	55.1823	23.4514	51.4241	27.4134	28.24	36.599	21.9164	19.8187	27.0647
BJN34_06710	alpha/beta hydrolase	0.143578	1.31312	0.0707735	0.790214	0.869863	0.024896	1.31312	0.00208662	0.963566	0.985078	0.118682	1.31312	0.0533566	0.817322	0.924698	2.15871	2.38562	1.47046	1.86057	1.8447	1.82635	1.34413	1.64528	1.247
BJN34_06715	O-acetylhomoserine aminocarboxypropyltransferase	-0.105288	6.58425	0.176907	0.674045	0.788492	-0.298194	6.58425	1.41272	0.234606	0.503693	0.192906	6.58425	0.593984	0.440883	0.694737	64.6746	58.2679	69.2152	63.2809	59.9444	49.6041	52.7536	51.1494	65.8553
BJN34_06720	CBS domain-containing protein	0.28111	8.62856	1.5852	0.208014	0.345685	-0.030668	8.62856	0.0188613	0.890765	0.958455	0.311778	8.62856	1.95397	0.16216	0.410809	912.767	943.858	798.539	731.234	593.807	868.029	475.953	663.245	650.269
BJN34_06725	MFS transporter	0.127067	7.49687	0.289702	0.590411	0.723541	0.216297	7.49687	0.840589	0.359228	0.632137	-0.0892297	7.49687	0.144082	0.704256	0.86585	93.8462	90.162	68.2014	98.7139	69.9711	104.979	54.8071	56.2385	75.9342
BJN34_06730	glutathione S-transferase	0.677742	6.31312	7.53568	0.0060489	0.020366	0.66055	6.31312	7.16613	0.0074293	0.049749	0.0171914	6.31312	0.00505693	0.943309	0.979759	133.02	120.683	79.3681	118.931	82.9953	131.758	48.3524	57.1122	61.7641
BJN34_06735	chorismate synthase	-0.465476	8.49702	4.60268	0.031922	0.0811707	-0.431255	8.49702	3.95645	0.0466922	0.181603	-0.034221	8.49702	0.0249524	0.874486	0.95054	238.09	258.057	251.098	254.207	264.921	265.831	254.995	290.093	300.932
BJN34_06740	MFS transporter	-0.214724	5.01481	0.543393	0.46103	0.608265	0.0869016	5.01481	0.0906982	0.763291	0.898634	-0.301626	5.01481	1.09608	0.295127	0.571918	22.9819	20.3949	14.6987	32.2004	22.4114	17.6958	18.2099	16.3384	19.657
BJN34_06745	FAD-dependent oxidoreductase	-0.108241	4.26275	0.130043	0.718387	0.820675	-0.259519	4.26275	0.741292	0.389247	0.660194	0.151277	4.26275	0.255308	0.613362	0.810648	17.2734	11.5559	15.1543	11.8923	14.9602	13.3847	10.7717	16.1476	11.757
BJN34_06750	FadR family transcriptional regulator	-1.81711	3.45737	19.8811	8.24e-06	7.24e-05	-1.95208	3.45737	22.6799	1.91e-06	5.34e-05	0.134975	3.45737	0.0964523	0.756129	0.89064	6.02524	6.26052	8.2064	3.85443	8.55773	6.67699	13.2067	21.7198	26.9138
BJN34_06755	flagellar brake protein	-2.37582	7.0438	46.4479	9.41e-12	2.87e-10	1.02682	7.0438	9.88286	0.00166825	0.0160208	-3.40264	7.0438	89.3314	3.34e-21	3.12e-19	27.1799	14.0286	26.9525	244.216	177.838	334.896	77.7014	102.837	114.693
BJN34_06760	electron transfer flavoprotein-ubiquinone oxidoreductase	-0.826482	9.05998	8.45487	0.00364067	0.0133376	-0.295008	9.05998	1.09203	0.296021	0.570958	-0.531473	9.05998	3.52316	0.0605169	0.229852	176.316	181.438	222.662	250.776	340.944	272.287	226.301	274.322	356.065
BJN34_06765	short-chain dehydrogenase	0.100591	7.77391	0.183965	0.667987	0.784455	-0.00613669	7.77391	0.000684379	0.979129	0.990256	0.106727	7.77391	0.207942	0.648385	0.833845	257.594	288.17	221.084	234.403	240.32	249.225	153.814	175.875	254.509
BJN34_06770	C4-dicarboxylate ABC transporter permease	-0.200477	5.3364	0.408415	0.522775	0.66556	0.273687	5.3364	0.775178	0.37862	0.650233	-0.474164	5.3364	2.33075	0.126841	0.359054	46.1696	62.7846	37.3133	72.4919	68.0058	65.5139	44.7278	28.9192	61.953
BJN34_06775	C4-dicarboxylate ABC transporter	-0.304646	5.75806	1.32527	0.249648	0.396823	-0.229189	5.75806	0.754359	0.3851	0.656433	-0.0754575	5.75806	0.0817175	0.774983	0.902453	33.2918	32.674	31.7863	44.0931	33.2733	27.9806	34.7232	28.0326	35.2026
BJN34_06780	C4-dicarboxylate ABC transporter	-0.735475	8.00042	8.1368	0.00433758	0.0155452	-0.438297	8.00042	2.91813	0.0875893	0.274669	-0.297179	8.00042	1.33809	0.24737	0.52395	160.943	155.68	180.269	213.382	240.131	172.399	201.369	264	217.166
BJN34_06785	thioesterase	0.438701	4.89518	2.05098	0.152108	0.275274	0.305191	4.89518	0.989711	0.319813	0.594625	0.13351	4.89518	0.197651	0.656624	0.837749	80.632	68.3745	66.1229	75.5069	70.0437	53.538	43.7739	55.6273	28.6918
BJN34_06790	PAS domain-containing protein	-0.431032	5.78494	2.88485	0.0894162	0.18366	-0.42012	5.78494	2.75041	0.0972295	0.295141	-0.0109121	5.78494	0.00184602	0.965729	0.988356	78.9008	65.8461	86.5948	82.2601	70.1039	89.257	65.0092	92.5474	101.951
BJN34_06795	succinyl-CoA--3-ketoacid-CoA transferase	1.1657	9.30179	24.4527	7.62e-07	8.79e-06	1.16579	9.30179	24.4599	7.59e-07	2.32e-05	-8.65e-05	9.30179	1.39e-07	0.999702	0.999848	1116.63	1018.6	782.01	911.96	1057.69	976.166	271.318	419.149	368.743
BJN34_06800	succinyl-CoA--3-ketoacid-CoA transferase	1.50004	9.3065	31.1371	2.4e-08	3.86e-07	1.24478	9.3065	21.6994	3.19e-06	8.3e-05	0.255265	9.3065	0.945536	0.330858	0.605088	1321.02	1402.53	880.327	953.774	1022.66	1066.52	221.879	426.532	391.617
BJN34_06805	metal-binding protein	-0.0693398	7.28101	0.0814662	0.77532	0.861128	-0.133759	7.28101	0.303061	0.58197	0.799202	0.0644192	7.28101	0.0705242	0.790575	0.91104	303.206	264.694	271.231	273.3	255.628	292.985	162.236	269.382	296.735
BJN34_06810	3-hydroxybutyrate dehydrogenase	-0.178833	8.51669	0.675926	0.410993	0.562951	-0.117091	8.51669	0.290159	0.590119	0.804169	-0.0617426	8.51669	0.0807514	0.776282	0.902507	435.61	366.062	364.967	420.776	364.497	462.95	290.298	403.535	389.571
BJN34_06815	alpha/beta hydrolase	-0.151158	7.2033	0.521815	0.470068	0.618187	-0.352093	7.2033	2.81698	0.0932717	0.287284	0.200935	7.2033	0.921191	0.337162	0.611289	170.046	143.167	128.139	134.335	127.933	128.06	126.092	130.025	140.595
BJN34_06820	RidA family protein	-0.131552	6.82491	0.347021	0.555804	0.693278	-0.124785	6.82491	0.312782	0.575978	0.795229	-0.00676715	6.82491	0.000923282	0.97576	0.992677	267.645	253.183	264.914	284.203	257.291	268.556	194.655	283.402	230.289
BJN34_06825	GTP pyrophosphokinase	0.191932	8.16282	0.67094	0.412724	0.564484	0.222235	8.16282	0.900067	0.342764	0.616601	-0.0303028	8.16282	0.0168266	0.89679	0.95692	108.274	107.6	129.583	127.435	117.416	120.046	72.8051	89.3764	88.0183
BJN34_06835	threonine--tRNA ligase	-1.45343	9.40337	23.0372	1.59e-06	1.69e-05	-0.78817	9.40337	6.97986	0.00824319	0.0536932	-0.665255	9.40337	4.97294	0.0257468	0.132741	148.125	162.856	204.316	272.415	334.344	236.319	398.85	333.759	430.835
BJN34_06840	translation initiation factor IF-3	-1.29136	9.77732	16.8161	4.12e-05	0.000288611	-0.663755	9.77732	4.55324	0.0328566	0.144352	-0.627609	9.77732	4.06642	0.0437439	0.187312	892.089	1187.12	1161.17	1728.49	1797.85	1627.94	2756.2	1643.31	2008.21
BJN34_06845	50S ribosomal protein L35	-2.43761	10.3695	33.8804	5.86e-09	1.11e-07	-1.43709	10.3695	12.5907	0.000387668	0.00501984	-1.00052	10.3695	6.21259	0.0126845	0.0842874	1505.2	1469.05	3065.01	4668.27	4449.24	3666.75	11347.9	7907.09	7981.25
BJN34_06850	50S ribosomal protein L20	-2.45031	10.5333	33.3372	7.75e-09	1.45e-07	-1.41202	10.5333	11.8629	0.000572634	0.00687161	-1.03829	10.5333	6.51328	0.0107072	0.0757245	929.126	929.958	1845.82	3094.83	2779.08	2164.22	7216.05	4982.42	4600.77
BJN34_06855	phenylalanine--tRNA ligase subunit alpha	-1.28549	7.78627	14.8463	0.000116639	0.000710297	-0.73389	7.78627	4.96064	0.0259307	0.121478	-0.551598	7.78627	2.79477	0.0945721	0.300927	89.1155	101.015	144.173	169.575	201.341	138.278	227.651	179.54	269.997
BJN34_06860	phenylalanine--tRNA ligase subunit beta	-0.884095	9.19716	12.6059	0.000384531	0.00203555	-0.507321	9.19716	4.20077	0.0404057	0.164958	-0.376774	9.19716	2.31564	0.128078	0.360745	143.196	139.487	166.801	199.162	214.077	188.055	190.9	232.221	264.28
BJN34_06865	integration host factor subunit alpha	-0.303597	8.15206	1.9901	0.15833	0.282642	-0.363514	8.15206	2.8509	0.0913227	0.282537	0.0599164	8.15206	0.0776014	0.780575	0.90452	618.784	615.827	480.658	569.685	456.89	652.999	521.326	636.945	558.06
BJN34_06870	MerR family transcriptional regulator	-0.632592	6.21974	4.30183	0.0380714	0.0936102	-0.185993	6.21974	0.378259	0.538537	0.77443	-0.446599	6.21974	2.15733	0.141891	0.379438	129.132	146.951	78.7595	137.005	118.484	235.068	135.49	131.345	174.896
BJN34_06880	XRE family transcriptional regulator	-0.244862	4.67903	0.864589	0.352458	0.504074	-0.171055	4.67903	0.426556	0.513684	0.759287	-0.0738069	4.67903	0.0796432	0.777782	0.903129	53.691	59.0385	46.7944	49.9635	57.838	62.7602	54.0432	57.4404	41.2321
BJN34_06885	addiction module toxin RelE	-0.186746	4.40425	0.332725	0.564059	0.700797	-0.116208	4.40425	0.129922	0.718513	0.880486	-0.0705374	4.40425	0.0482426	0.82615	0.928463	40.6565	49.0771	31.5612	40.2895	33.8517	56.5609	46.0609	28.5779	35.6312
BJN34_06890	hypothetical protein	0.594291	3.73125	3.24609	0.071594	0.154429	0.110764	3.73125	0.108316	0.74207	0.889097	0.483528	3.73125	2.2713	0.131789	0.36562	31.0054	22.1275	28.6141	17.6328	21.2929	20.7618	17.2768	12.8281	13.3903
BJN34_06895	hypothetical protein	-0.338703	3.26259	0.819954	0.365194	0.51802	-0.236803	3.26259	0.408872	0.522543	0.763863	-0.1019	3.26259	0.0750604	0.784106	0.906975	29.4274	19.8138	30.1921	28.0822	19.7627	40.8598	23.188	30.7057	28.4235
BJN34_06900	hypothetical protein	0.279875	4.56336	0.921137	0.337177	0.48995	-0.165478	4.56336	0.313395	0.575604	0.795144	0.445353	4.56336	2.35873	0.124584	0.355145	61.7109	62.4948	57.7125	55.7703	39.4929	42.0446	29.2576	57.6955	35.9119
BJN34_06905	hypothetical protein	-0.151501	4.85373	0.268868	0.604092	0.734788	-0.169529	4.85373	0.33723	0.561432	0.787026	0.0180285	4.85373	0.00384998	0.950524	0.982616	91.2758	108.634	65.7493	83.4476	84.9088	97.2481	99.0468	66.0759	69.823
BJN34_06910	hypothetical protein	-0.64453	6.58306	6.41131	0.0113396	0.034497	0.858681	6.58306	11.7794	0.000598885	0.00708834	-1.50321	6.58306	34.832	3.59e-09	1.38e-07	147.498	143.58	110.198	417.132	300.356	446.926	153.691	216.207	139.106
BJN34_06915	NAD-glutamate dehydrogenase	1.66551	7.20201	31.3129	2.2e-08	3.58e-07	0.697392	7.20201	5.64944	0.017461	0.0922126	0.968114	7.20201	11.0983	0.00086407	0.0119418	56.7982	46.6419	28.9091	21.5816	20.9713	25.3637	6.78361	12.6525	14.402
BJN34_06920	MarR family transcriptional regulator	1.42883	5.08781	10.5387	0.00116902	0.00518866	0.363796	5.08781	0.688589	0.406645	0.674236	1.06503	5.08781	6.07093	0.0137425	0.0886693	112.795	117.567	35.0678	49.4158	31.5423	44.4845	20.3581	17.2545	40.0633
BJN34_06925	propionyl-CoA--succinate CoA transferase	0.188234	3.02654	0.228719	0.632476	0.758123	0.357905	3.02654	0.850164	0.356506	0.6305	-0.169671	3.02654	0.204046	0.651475	0.83549	4.01664	3.41085	5.15217	4.1566	5.92256	4.62218	3.07245	2.45709	3.65976
BJN34_06930	hypothetical protein	0.0525569	9.87269	0.0341729	0.85334	0.912513	0.346009	9.87269	1.47861	0.223992	0.48894	-0.293452	9.87269	1.06499	0.302079	0.578464	2585.51	2455.12	1499.44	2312.24	3179.88	2512.42	1302.17	2244.03	1555.07
BJN34_06935	ABC transporter substrate-binding protein	2.59211	8.73068	31.2959	2.22e-08	3.6e-07	0.342039	8.73068	0.60762	0.435685	0.698468	2.25007	8.73068	24.2559	8.43e-07	2.4e-05	457.914	621.146	1285.18	218.355	189.467	120.5	105.605	109.229	118.575
BJN34_06945	LysR family transcriptional regulator	-0.784586	3.74816	4.66856	0.0307196	0.0788371	-0.646387	3.74816	3.23469	0.0720942	0.242556	-0.138199	3.74816	0.141684	0.706613	0.866196	8.42951	8.58355	11.2661	8.22602	12.8515	11.1201	16.0136	11.5632	12.4218
BJN34_06950	8-oxoguanine deaminase	0.372955	4.59521	2.28936	0.130263	0.245013	0.17458	4.59521	0.494924	0.481739	0.735839	0.198375	4.59521	0.685985	0.407533	0.670954	18.6596	16.0254	15.6714	13.953	15.4119	15.1963	9.80521	12.0464	9.60303
BJN34_06960	DUF1488 domain-containing protein	-0.207683	8.06357	1.06019	0.303172	0.455054	-0.173518	8.06357	0.7411	0.389309	0.660194	-0.034165	8.06357	0.0287704	0.86531	0.946959	926.94	877.046	719.248	893.464	818.76	916.848	686.955	809.428	873.262
BJN34_06965	sulfate transporter	0.466214	5.94408	4.35631	0.036872	0.0912444	0.299675	5.94408	1.79358	0.180491	0.433028	0.166539	5.94408	0.576388	0.447732	0.700112	37.0134	33.9411	30.0211	31.5858	30.6695	29.5156	16.0509	19.2327	24.466
BJN34_06970	homoprotocatechuate degradation operon regulator, HpaR	0.612757	5.38819	5.50236	0.0189908	0.0531498	0.484734	5.38819	3.43531	0.0638167	0.223504	0.128023	5.38819	0.253254	0.614793	0.812201	92.8613	87.3246	66.2364	66.2142	92.2887	67.6864	41.0097	49.4024	39.3067
BJN34_06975	exodeoxyribonuclease III	-0.0329408	6.72451	0.00870786	0.925653	0.957834	0.485478	6.72451	1.89437	0.168709	0.414089	-0.518418	6.72451	2.16521	0.141166	0.37929	86.984	111.806	88.8875	111.889	200.921	102.375	49.2167	97.1636	97.2661
BJN34_06980	oligopeptidase A	-0.100593	8.67729	0.0760497	0.782724	0.864919	0.385134	8.67729	1.11323	0.291381	0.566157	-0.485727	8.67729	1.76861	0.183555	0.442525	165.734	154.347	126.429	148.354	333.18	141.626	97.9557	144.532	149.228
BJN34_06985	bifunctional methylenetetrahydrofolate dehydrogenase/methenyltetrahydrofolate cyclohydrolase	-1.03679	6.23275	11.7551	0.000606773	0.00298812	-0.785432	6.23275	6.84996	0.00886432	0.0567776	-0.251355	6.23275	0.695512	0.404296	0.668261	50.6057	51.699	58.2299	63.3742	75.5775	57.1918	104.002	65.4769	98.9212
BJN34_06990	hypothetical protein	-0.214025	3.30627	0.391553	0.531484	0.672017	-0.146704	3.30627	0.186773	0.665616	0.850475	-0.067321	3.30627	0.0396349	0.842196	0.936615	13.8532	11.8724	7.98379	14.8299	10.3754	10.2624	7.10579	12.4376	11.751
BJN34_06995	DNA-binding response regulator	-0.125828	8.72433	0.379223	0.538019	0.67781	-0.00171071	8.72433	7.02e-05	0.993314	0.996376	-0.124117	8.72433	0.369985	0.543012	0.767428	590.309	575.933	490.444	648.558	556.657	638.149	437.164	508.666	525.845
BJN34_07000	PAS domain-containing sensor histidine kinase	-0.461562	7.92992	2.3956	0.121677	0.232028	-0.170118	7.92992	0.327367	0.567213	0.791359	-0.291444	7.92992	0.958461	0.327575	0.602049	63.5081	62.6702	74.7361	100.56	77.5628	76.4683	85.1003	52.9911	87.6537
BJN34_07005	pyruvate dehydrogenase (acetyl-transferring), homodimeric type	0.374431	11.7754	1.62454	0.20246	0.338607	1.10902	11.7754	13.9589	0.000186852	0.00275856	-0.734585	11.7754	6.20854	0.0127135	0.0843184	951.599	826.391	1161.04	1583.49	2015.78	1440.7	635.617	656.315	576.752
BJN34_07010	dihydrolipoyllysine-residue acetyltransferase	0.485912	10.6044	4.23319	0.039641	0.0969655	0.980507	10.6044	17.0116	3.72e-05	0.00071855	-0.494595	10.6044	4.39579	0.0360277	0.1676	808.445	849.66	699.072	1106.39	1277.07	982.447	399.165	455.558	517.177
BJN34_07015	MFS transporter	0.42716	9.37387	3.07327	0.0795891	0.167794	1.00137	9.37387	16.6635	4.46e-05	0.000826285	-0.574208	9.37387	5.56773	0.0182945	0.106001	803.228	819.806	728.084	1150.21	1393.09	1008.55	423.971	459.623	543.379
BJN34_07020	dihydrolipoyl dehydrogenase	0.417496	10.7635	3.39954	0.0652145	0.143896	0.949792	10.7635	17.3638	3.09e-05	0.000617645	-0.532296	10.7635	5.52704	0.0187248	0.107326	852.928	796.491	755.407	1240.05	1248.03	1056.12	463.871	494.722	507.868
BJN34_07025	universal stress protein	0.421164	3.53626	1.78452	0.181595	0.313479	0.193882	3.53626	0.369841	0.543091	0.775813	0.227282	3.53626	0.562407	0.453292	0.705859	27.8831	28.2344	19.7301	20.2496	18.8227	26.2409	16.2809	16.6042	11.9661
BJN34_07030	hypothetical protein	0.463057	2.3884	0.502743	0.478297	0.624741	0.426099	2.3884	0.42588	0.514017	0.759287	0.0369579	2.3884	0.00341255	0.953416	0.983507	30.9711	25.151	12.3093	9.64972	27.3692	28.4803	14.269	22.2074	1.52042
BJN34_07035	AmmeMemoRadiSam system radical SAM enzyme	1.42672	3.10346	5.12385	0.0235992	0.0632923	0.675317	3.10346	1.13613	0.286473	0.563705	0.751399	3.10346	1.54318	0.214146	0.485668	12.6984	15.427	1.92257	5.03165	4.73802	7.78287	3.69597	1.69346	2.80769
BJN34_07040	Phasin (PHA-granule associated protein)	-2.65118	12.1025	77.826	1.13e-18	6.09e-17	-0.193363	12.1025	0.468207	0.493813	0.745241	-2.45782	12.1025	67.9203	1.7e-16	1.1e-14	1717.37	1520.7	1448.28	7450.19	8107.19	10803.5	9744.56	6823.03	7026.49
BJN34_07045	histone deacetylase	-1.1691	4.8938	9.09268	0.00256634	0.0099884	-0.25425	4.8938	0.455069	0.499938	0.749422	-0.914849	4.8938	5.61894	0.0177674	0.104167	15.0844	13.1966	19.0256	34.4534	37.5922	20.4351	34.9541	19.7528	32.6645
BJN34_07050	peptide ABC transporter ATP-binding protein	-0.793047	3.81906	2.82985	0.0925267	0.188262	-0.339927	3.81906	0.538139	0.463205	0.721537	-0.45312	3.81906	0.928506	0.335251	0.60942	6.70758	6.91846	13.2934	10.9172	11.7519	16.1737	12.8598	7.13358	19.1759
BJN34_07055	thioesterase	0.221566	6.0106	0.325298	0.568441	0.70485	-0.832021	6.0106	4.46485	0.0345991	0.148718	1.05359	6.0106	7.15751	0.00746507	0.058573	238.017	203.412	58.6992	70.1996	72.71	93.9625	101.863	124.855	109.092
BJN34_07060	nitrobenzoate reductase	0.371586	5.57976	0.984612	0.321063	0.473592	-0.527057	5.57976	1.93981	0.163689	0.406667	0.898643	5.57976	5.66554	0.0173014	0.102389	101.01	101.063	30.8193	42.5814	35.6656	45.3019	34.1112	62.6486	46.0535
BJN34_07065	peptidase S11	-0.507259	9.48087	4.37016	0.0365735	0.0907002	0.094379	9.48087	0.15237	0.696281	0.86626	-0.601638	9.48087	6.14355	0.0131892	0.0863257	371.024	383.256	400.161	570.846	571.773	662.054	356.378	434.579	565.327
BJN34_07070	hydroxyacid dehydrogenase	2.67078	5.94024	3.34325	0.0674812	0.147394	-1.66741	5.94024	1.38864	0.238635	0.509972	4.33819	5.94024	7.57543	0.00591694	0.0494793	98.9592	126.404	60.0133	0	13.1007	0	8.57553	9.81964	17.548
BJN34_07075	FadR family transcriptional regulator	3.47653	5.67434	58.8924	1.67e-14	6.99e-13	0.0209278	5.67434	0.00226006	0.962083	0.984986	3.4556	5.67434	59.145	1.46e-14	8.25e-13	170.711	193.228	92.3547	15.218	15.1207	10.5619	7.25385	5.73841	19.6655
BJN34_07080	IclR family transcriptional regulator	-1.0804	7.68469	18.1732	2.02e-05	0.000155346	-0.899326	7.68469	12.7146	0.000362815	0.00475256	-0.181074	7.68469	0.517489	0.471915	0.716204	145.907	139.414	190.013	182.461	180.623	197.581	258.612	290.764	284.453
BJN34_07085	Fe-S oxidoreductase	-0.068474	6.64715	0.0883189	0.766325	0.85471	-0.211806	6.64715	0.842503	0.358682	0.63179	0.143332	6.64715	0.388241	0.533226	0.759682	124.621	129.774	111.221	101.117	116.788	119.494	110.154	91.1406	108.478
BJN34_07090	iron-sulfur cluster-binding protein	0.388568	7.40219	3.39213	0.0655081	0.144406	0.0831914	7.40219	0.155173	0.69364	0.865207	0.305377	7.40219	2.11598	0.145769	0.387299	124.504	121.043	118.118	97.9256	92.1415	111.769	65.2366	85.1861	77.2518
BJN34_07095	hypothetical protein	0.645803	5.40919	5.27121	0.0216809	0.0592417	0.219534	5.40919	0.603076	0.437407	0.69977	0.426269	5.40919	2.36849	0.123807	0.354671	179.467	175.569	157.274	113.906	107.96	169.831	56.7142	118.053	94.5581
BJN34_07100	LysR family transcriptional regulator	-0.124207	4.6829	0.280756	0.596206	0.728322	-0.101945	4.6829	0.190557	0.662453	0.84894	-0.022262	4.6829	0.00923711	0.923433	0.970972	24.6749	27.3067	19.5637	24.2339	24.7874	24.7036	17.6221	22.8919	23.1613
BJN34_07105	ornithine cyclodeaminase	-0.337617	3.72352	0.871227	0.350616	0.503038	0.460939	3.72352	1.75355	0.185431	0.440757	-0.798556	3.72352	5.21225	0.0224283	0.121513	9.28864	7.91725	7.09771	15.857	9.05692	19.0314	7.93828	10.5307	6.49179
BJN34_07110	ABC transporter permease	0.411108	2.7541	0.58406	0.444725	0.591487	0.96636	2.7541	3.36169	0.0667297	0.229755	-0.555252	2.7541	1.19648	0.274026	0.551558	7.69228	4.04878	5.08887	10.3563	7.2564	8.2108	2.45614	6.78325	0.945532
BJN34_07115	LacI family transcriptional regulator	-0.382636	2.74385	1.02928	0.310328	0.462685	0.446051	2.74385	1.64341	0.199858	0.458217	-0.828687	2.74385	5.55375	0.0184411	0.106317	3.59823	4.64946	3.01329	5.87015	7.03329	8.03914	2.61832	5.00835	4.7429
BJN34_07120	ABC transporter ATP-binding protein	-1.23724	7.12176	19.3297	1.1e-05	9.31e-05	-0.535313	7.12176	3.74254	0.0530437	0.196773	-0.701925	7.12176	6.3143	0.0119768	0.0814371	91.7117	79.4326	101.286	144.865	178.731	130.915	184.423	152.075	189.165
BJN34_07125	ABC transporter permease	-1.49164	6.52362	14.8789	0.000114637	0.000702431	-0.626389	6.52362	2.74335	0.0976596	0.296057	-0.865253	6.52362	5.1179	0.0236802	0.125834	43.6282	30.6583	64.2958	78.8901	104.271	79.9646	131.35	80.0648	110.072
BJN34_07130	ABC transporter substrate-binding protein	-1.80507	9.14093	21.028	4.53e-06	4.25e-05	-0.899561	9.14093	5.47218	0.0193215	0.0996886	-0.905511	9.14093	5.52523	0.0187441	0.107349	183.405	174.195	332.086	423.973	540.593	390.248	783.148	499.848	721.281
BJN34_07135	DUF2092 domain-containing protein	0.246766	6.09811	0.69803	0.403446	0.556467	0.0269064	6.09811	0.00827294	0.927528	0.972438	0.219859	6.09811	0.559522	0.454453	0.705859	103.715	93.781	48.6839	60.8163	64.0704	87.2006	42.9323	50.995	72.5975
BJN34_07140	hypothetical protein	0.366816	4.79294	1.5898	0.207355	0.344878	0.135777	4.79294	0.215675	0.642355	0.83855	0.231038	4.79294	0.652073	0.419372	0.68229	62.5538	73.213	36.538	50.7438	38.4979	59.0182	29.4609	44.6987	33.0666
BJN34_07145	dihydroorotate dehydrogenase (quinone)	-0.486525	6.17667	2.54514	0.110634	0.215783	-0.23465	6.17667	0.59805	0.439323	0.701862	-0.251874	6.17667	0.685556	0.40768	0.670972	48.9774	46.5667	54.5826	56.5608	70.0723	56.7659	71.2304	43.1692	55.88
BJN34_07150	arginyltransferase	0.66205	6.66541	7.95875	0.00478554	0.0167937	0.219949	6.66541	0.875477	0.349443	0.623755	0.442101	6.66541	3.62302	0.0569854	0.22117	173.689	147.449	105.65	100.027	97.611	120.065	55.675	86.3709	76.7205
BJN34_07155	leucyl/phenylalanyl-tRNA--protein transferase	0.531333	6.57196	5.03873	0.0247866	0.0658122	0.166854	6.57196	0.494974	0.481717	0.735839	0.36448	6.57196	2.41527	0.120157	0.347959	138.922	135.905	122.089	109.538	89.0471	117.051	84.4061	69.3632	67.2114
BJN34_07160	NUDIX hydrolase	-0.153331	7.59643	0.486871	0.485326	0.631773	-0.368625	7.59643	2.8016	0.0941702	0.28877	0.215295	7.59643	0.958921	0.327459	0.602049	307.878	295.459	270.325	247.393	226.261	297.575	271.362	243.392	271.959
BJN34_07170	phosphoanhydride phosphorylase	0.65943	5.11894	4.91576	0.0266128	0.0697717	0.588346	5.11894	3.91307	0.047912	0.185228	0.0710835	5.11894	0.0604548	0.805779	0.917206	71.9682	53.5748	35.9442	47.6819	39.682	68.4237	20.7729	32.2552	28.9618
BJN34_07175	DUF2384 domain-containing protein	0.942311	6.07378	13.8261	0.000200526	0.00114463	0.844257	6.07378	11.1089	0.000859151	0.00951802	0.0980542	6.07378	0.159252	0.689846	0.856885	195.525	208.679	148.497	180.878	130.305	216.233	58.0735	82.3276	93.1523
BJN34_07180	benzoyl-CoA oxygenase/reductase, BoxA protein	1.32356	5.48148	16.9187	3.9e-05	0.000275089	3.49332	5.48148	119.767	7.11e-28	1.12e-25	-2.16976	5.48148	56.6092	5.32e-14	2.88e-12	16.1162	18.9675	11.8022	87.4887	55.7426	72.9778	3.52837	7.26956	4.38922
BJN34_07185	benzoyl-CoA oxygenase subunit B	1.09332	6.31471	9.11705	0.00253238	0.00987844	3.972	6.31471	109.378	1.34e-25	1.86e-23	-2.87868	6.31471	66.0102	4.49e-16	2.85e-14	20.2425	16.6417	12.5939	153.515	72.4469	148.878	3.55165	8.17102	7.16843
BJN34_07190	benzoyl-CoA-dihydrodiol lyase	0.00517598	6.25922	0.00012261	0.991165	0.994757	2.38302	6.25922	24.3073	8.21e-07	2.49e-05	-2.37784	6.25922	24.3165	8.17e-07	2.34e-05	20.0352	17.662	11.396	118.39	38.636	105.053	5.40915	19.9453	14.946
BJN34_07195	helix-turn-helix domain-containing protein	-1.08446	5.41605	10.2654	0.00135545	0.00586198	-0.226265	5.41605	0.469008	0.493444	0.745038	-0.858194	5.41605	6.48754	0.0108633	0.0765186	26.3204	21.9121	21.2436	47.0347	34.6038	47.5421	48.0019	22.6527	47.6182
BJN34_07200	4-hydroxybenzoate--CoA ligase	0.668488	5.86038	0.967409	0.325327	0.477064	1.84659	5.86038	7.04603	0.0079441	0.0522861	-1.17811	5.86038	2.9925	0.0836508	0.280619	35.8588	29.8898	9.01009	88.7684	24.5419	56.0574	2.39976	19.1147	16.6564
BJN34_07205	alpha/beta hydrolase	0.792008	5.47496	3.40963	0.0648169	0.143201	1.59778	5.47496	13.6454	0.000220783	0.00320482	-0.805768	5.47496	3.67957	0.0550832	0.216577	46.9548	51.7417	26.6488	109.401	39.023	74.8996	14.2582	13.0171	30.9268
BJN34_07210	ABC transporter permease	0.243268	7.67914	0.361405	0.547727	0.686418	0.215357	7.67914	0.283335	0.594524	0.806679	0.0279113	7.67914	0.00477509	0.944908	0.980597	136.089	173.557	159.912	225.041	129.744	120.378	90.0628	59.145	177.641
BJN34_07215	branched-chain amino acid ABC transporter permease	0.475599	5.50375	1.59484	0.206636	0.344179	1.1939	5.50375	10.0267	0.00154286	0.0150039	-0.718296	5.50375	3.76665	0.0522842	0.210965	27.8884	38.207	51.1188	89.6876	65.4729	46.9183	23.174	18.1537	28.7166
BJN34_07220	branched-chain amino acid ABC transporter permease	0.323801	5.58132	0.648039	0.420815	0.571318	1.15863	5.58132	8.26145	0.00404958	0.0320083	-0.834831	5.58132	4.39809	0.0359792	0.1676	21.5126	26.4765	43.4273	75.9101	57.6441	37.5934	16.2379	18.1868	27.1679
BJN34_07225	ABC transporter ATP-binding protein	0.737626	5.602	2.5438	0.110728	0.215906	1.28802	5.602	7.67123	0.00561083	0.04068	-0.550396	5.602	1.45985	0.226954	0.501414	36.0842	42.7149	74.9057	103.84	86.4038	46.5422	13.7225	37.1347	27.9053
BJN34_07230	ABC transporter ATP-binding protein	0.914536	5.39041	3.47195	0.0624179	0.138965	1.22514	5.39041	6.19193	0.0128334	0.0738027	-0.310607	5.39041	0.416634	0.518621	0.748709	33.1212	40.961	78.4341	84.807	77.6955	36.6865	15.2722	34.8442	19.2186
BJN34_07235	potassium transporter Kup	-1.34787	7.7831	20.8682	4.92e-06	4.55e-05	-0.654702	7.7831	5.08318	0.024159	0.116687	-0.693173	7.7831	5.63828	0.0175724	0.103321	63.457	60.5025	52.6828	103.14	90.5492	97.99	139.135	76.8828	145.483
BJN34_07240	bifunctional UDP-4-keto-pentose/UDP-xylose synthase	-1.15569	8.37341	18.1166	2.08e-05	0.000159143	-0.556921	8.37341	4.30741	0.0379466	0.159045	-0.598766	8.37341	4.94411	0.0261798	0.134174	166.458	166.414	182.972	255.791	304.879	239.82	358.598	285.36	290.034
BJN34_07245	4-amino-4-deoxy-L-arabinose transferase	-1.42249	6.8458	14.3735	0.000149898	0.000887088	-0.800766	6.8458	4.70269	0.0301155	0.135755	-0.621725	6.8458	2.81415	0.0934366	0.299101	38.7184	29.5453	29.9386	60.0745	53.0314	40.6183	98.4886	40.0821	70.5394
BJN34_07250	DNA-binding response regulator	-0.10074	4.60726	0.149421	0.699089	0.806211	-0.278559	4.60726	1.12855	0.288086	0.56478	0.177819	4.60726	0.467635	0.494077	0.729578	35.0159	38.0412	22.0299	33.0039	22.5825	29.709	25.4824	27.5166	29.0461
BJN34_07255	two-component sensor histidine kinase	0.00995874	4.90781	0.00151877	0.968913	0.982536	0.0807501	4.90781	0.100667	0.75103	0.893187	-0.0707914	4.90781	0.0792123	0.778368	0.903302	21.3473	21.4747	13.5581	24.1857	16.5908	19.199	13.0415	17.5148	14.4672
BJN34_07260	RNA-binding transcriptional accessory protein	-1.75474	8.35822	30.3505	3.61e-08	5.52e-07	-1.04352	8.35822	11.1716	0.000830606	0.00930602	-0.711219	8.35822	5.20304	0.0225475	0.121588	52.1605	51.9138	74.3638	101.292	120.81	80.0386	143.986	152.022	206.403
BJN34_07265	hypothetical protein	-0.39599	7.39569	2.56863	0.109002	0.213502	-0.353044	7.39569	2.04621	0.152586	0.39043	-0.0429465	7.39569	0.0302843	0.861847	0.946125	148.949	151.957	183.237	174.742	166.602	175.399	180.606	159.901	182.992
BJN34_07270	DUF465 domain-containing protein	0.0787167	5.73664	0.122794	0.726024	0.826282	-0.088644	5.73664	0.154793	0.693997	0.86534	0.167361	5.73664	0.562799	0.453135	0.705851	284.539	223.548	212.6	216.004	194.97	244.482	184.557	198.911	168.084
BJN34_07275	helicase	-0.0721468	7.77018	0.103415	0.747769	0.840915	-0.0527137	7.77018	0.0552609	0.814149	0.922297	-0.019433	7.77018	0.00753234	0.930839	0.973693	104.562	84.165	71.5307	99.7295	75.2882	93.3737	75.8362	74.8841	69.3577
BJN34_07280	outer membrane protein assembly factor BamD	-0.906341	8.18304	10.6911	0.00107653	0.0048339	-0.455838	8.18304	2.74568	0.0975174	0.295757	-0.450503	8.18304	2.66967	0.102277	0.315162	218.318	240.506	247.912	309.477	340.568	342.638	434.998	284.777	352.091
BJN34_07285	pseudouridine synthase	-0.242517	7.16393	0.995348	0.318439	0.470724	-0.359112	7.16393	2.17792	0.140004	0.37056	0.116596	7.16393	0.230107	0.631445	0.823102	95.6983	83.1967	105.048	93.9967	90.1613	86.112	89.8058	85.0713	101.041
BJN34_07290	peptidoglycan editing factor PgeF	-0.256396	5.69529	0.848048	0.357105	0.509006	-0.240349	5.69529	0.747698	0.387206	0.657756	-0.0160462	5.69529	0.00333635	0.953939	0.983776	49.2573	42.6019	61.8162	58.2146	50.4936	52.775	55.0019	51.0091	44.6383
BJN34_07295	hypothetical protein	0.408798	3.20159	1.40763	0.23545	0.379837	0.110195	3.20159	0.0989509	0.753092	0.894564	0.298603	3.20159	0.806003	0.369305	0.639138	32.3042	46.4191	35.0681	35.7323	26.8712	32.0916	23.4323	17.933	28.5725
BJN34_07300	class I poly(R)-hydroxyalkanoic acid synthase	0.62958	10.7995	4.36493	0.0366859	0.0908813	0.385848	10.7995	1.64723	0.199337	0.45766	0.243732	10.7995	0.659016	0.416908	0.680497	1130.56	1088.95	965.767	972.331	721.886	1066.84	315.452	782.433	611.15
BJN34_07305	acetyl-CoA acetyltransferase	0.771421	11.1435	5.06619	0.024397	0.0649461	0.683617	11.1435	3.98839	0.0458149	0.17912	0.0878043	11.1435	0.066439	0.796594	0.912728	1917.88	2140.13	1892.61	1889.9	1837.25	2006.39	429.695	1330.54	1160.51
BJN34_07310	beta-ketoacyl-ACP reductase	1.18303	11.3008	12.9264	0.000323988	0.00174575	0.856738	11.3008	6.86478	0.00879111	0.056413	0.32629	11.3008	1.00897	0.315149	0.591193	4493.9	4633.48	3001	3295.69	3061.72	3414.47	701.354	1900.63	1801.57
BJN34_07315	polyhydroxyalkanoate synthesis repressor PhaR	0.127713	9.09431	0.280087	0.596644	0.728601	-0.315963	9.09431	1.70857	0.191171	0.447702	0.443677	9.09431	3.36875	0.0664441	0.244295	1004.42	1145.95	796.176	778.538	608.487	819.386	601.958	659.133	931.039
BJN34_07320	putative addiction module antidote protein	-0.31896	4.81873	1.3156	0.251383	0.398629	0.219005	4.81873	0.646635	0.421318	0.686402	-0.537965	4.81873	3.87717	0.048947	0.201693	62.9961	70.3529	66.781	124.349	69.615	107.568	61.9993	65.3202	76.6128
BJN34_07325	dihydrouridine synthase	-1.43342	4.36098	11.4074	0.000731526	0.00350525	-0.656056	4.36098	2.54297	0.110786	0.320285	-0.777363	4.36098	3.3742	0.0662248	0.243904	10.7042	10.7421	8.34319	19.4517	19.5744	13.0128	30.9146	11.3527	21.7152
BJN34_07330	ribosomal protein S12 methylthiotransferase	-1.84328	6.92862	28.7929	8.05e-08	1.13e-06	-1.07283	6.92862	10.2496	0.00136711	0.0136396	-0.770449	6.92862	5.23078	0.0221906	0.120724	33.1101	31.9817	42.8363	60.3663	74.2906	55.5117	131.647	74.5938	109.73
BJN34_07335	acetyl-CoA acetyltransferase	-0.780484	9.18833	9.41073	0.00215719	0.00861383	-0.592294	9.18833	5.45206	0.0195452	0.100543	-0.18819	9.18833	0.552558	0.457274	0.707431	378.57	313.619	312.089	325.421	456.323	379.585	361.217	558.033	498.203
BJN34_07340	hypothetical protein	-1.01188	6.53917	20.988	4.62e-06	4.33e-05	-0.401032	6.53917	3.42223	0.0643241	0.224712	-0.610846	6.53917	7.697	0.00553127	0.0473406	92.0421	78.3594	80.4641	124.645	138.275	128.864	118.344	142.408	154.541
BJN34_07345	cystathionine beta-lyase	-0.346474	6.863	2.3062	0.128859	0.242913	-0.158166	6.863	0.484314	0.486475	0.73966	-0.188308	6.863	0.684759	0.407953	0.671261	79.7096	63.1867	74.1503	91.6153	75.2208	87.7117	62.9696	86.5631	77.4784
BJN34_07350	DUF2789 domain-containing protein	-0.590172	5.72686	4.80855	0.0283189	0.0736867	-0.767518	5.72686	8.06349	0.0045166	0.034864	0.177346	5.72686	0.428803	0.512577	0.745449	166.336	199.714	143.452	157.542	132.454	169.679	249.377	163.787	199.886
BJN34_07355	phosphoserine phosphatase SerB	-1.05393	6.62605	11.7953	0.00059381	0.00292845	-0.746288	6.62605	6.01248	0.0142051	0.0793878	-0.307639	6.62605	1.01583	0.31351	0.590302	55.4579	63.0716	86.3268	84.5211	96.1027	83.0523	130.854	99.1877	120.873
BJN34_07360	N-acyl-L-amino acid amidohydrolase	1.10739	7.62743	15.8522	6.85e-05	0.000449493	0.699877	7.62743	6.39625	0.0114362	0.0678903	0.407509	7.62743	2.21534	0.136645	0.372199	152.996	159.305	185.104	137.734	119.934	130.164	49.1691	89.1299	53.5004
BJN34_07365	acetylornithine deacetylase (ArgE)	-0.375931	7.27209	1.36965	0.241872	0.387309	-0.222129	7.27209	0.480075	0.488388	0.740914	-0.153802	7.27209	0.229966	0.631549	0.823102	72.5769	80.7391	129.893	111.355	99.8765	121.022	101.64	119.88	86.033
BJN34_07370	transcription-repair coupling factor	-0.519273	6.96786	4.42496	0.0354169	0.0883064	-0.77634	6.96786	9.79626	0.00174867	0.0166545	0.257067	6.96786	1.07829	0.29908	0.57585	29.2499	24.4151	32.1522	24.7236	26.1151	23.1479	32.2916	34.7053	34.2641
BJN34_07375	2-C-methyl-D-erythritol 4-phosphate cytidylyltransferase	-0.616317	6.04648	7.02652	0.00803113	0.025792	-0.133298	6.04648	0.338115	0.56092	0.786923	-0.483019	6.04648	4.35732	0.0368503	0.170265	60.9194	62.5184	53.5015	85.9639	79.9424	86.5473	78.7754	61.3988	79.0479
BJN34_07380	2-C-methyl-D-erythritol 2,4-cyclodiphosphate synthase	-0.429059	5.93959	3.36031	0.0667856	0.14629	-0.175339	5.93959	0.570262	0.450155	0.711208	-0.25372	5.93959	1.18377	0.27659	0.554462	96.4117	81.1404	86.8308	113.065	110.261	98.8021	75.9835	117.022	99.9126
BJN34_07385	GNAT family N-acetyltransferase	0.736088	7.30428	7.47772	0.00624673	0.0209556	-0.185475	7.30428	0.473945	0.491178	0.743532	0.921563	7.30428	11.6849	0.000630097	0.00938234	402.053	423.177	207.954	151.81	178.136	215.548	151.248	178.059	165.283
BJN34_07390	carboxymuconolactone decarboxylase	-0.321984	7.56951	1.55637	0.212198	0.351581	-0.0101888	7.56951	0.00156817	0.968412	0.986797	-0.311796	7.56951	1.46463	0.226194	0.500214	251.583	262.405	295.371	289.294	402.311	339.757	224.495	314.707	300.267
BJN34_07395	alkyl hydroperoxide reductase	-0.352789	11.6403	1.50278	0.220244	0.361452	-0.0858237	11.6403	0.0891609	0.765247	0.899239	-0.266965	11.6403	0.861564	0.353301	0.626843	3799.69	3733.92	5363.59	4995.92	6009.11	5104.35	3817.22	5143.14	4809.7
BJN34_07400	MFS transporter	-4.26976	8.26496	51.163	8.5e-13	3.02e-11	-5.76473	8.26496	80.2959	3.22e-19	3.33e-17	1.49497	8.26496	7.52478	0.00608561	0.0504029	16.7844	17.9405	50.2343	15.6973	7.94851	8.76656	623.393	308.595	452.323
BJN34_07405	two-component sensor histidine kinase	-0.509771	6.43455	4.66679	0.0307513	0.0788489	0.167415	6.43455	0.516766	0.472225	0.728458	-0.677186	6.43455	8.33141	0.00389654	0.0367004	40.7348	47.984	35.775	70.7652	59.2186	73.7446	52.6724	41.9179	48.3105
BJN34_07410	two-component system response regulator OmpR	-0.350995	8.17729	2.83504	0.0922285	0.187876	-0.191346	8.17729	0.846006	0.357685	0.631344	-0.159649	8.17729	0.588481	0.443007	0.696341	325.665	329.477	274.783	353.64	336.2	369.209	321.101	304.808	334.31
BJN34_07415	hypothetical protein	-0.874809	3.12734	2.7022	0.10021	0.200304	-0.41745	3.12734	0.640746	0.423441	0.687595	-0.457358	3.12734	0.740421	0.389526	0.656607	15.6888	17.0262	10.2988	16.3734	15.0107	29.5529	31.7003	7.76114	24.0165
BJN34_07420	Zn-dependent hydrolase	-0.438699	5.77511	1.66317	0.197176	0.332258	-0.324192	5.77511	0.913222	0.339261	0.614611	-0.114507	5.77511	0.113666	0.736009	0.881377	36.9002	28.7031	31.9714	40.3434	43.0338	24.1276	45.6091	27.6519	33.1342
BJN34_07425	squalene synthase HpnD	-1.45698	5.18064	8.327	0.003906	0.0141969	-0.684306	5.18064	1.91962	0.165898	0.409366	-0.772677	5.18064	2.38869	0.122216	0.351567	17.5431	17.9935	24.5768	36.0545	42.0278	28.512	71.4864	17.5201	44.0809
BJN34_07430	efflux transporter periplasmic adaptor subunit	-0.607352	6.95878	5.46228	0.0194313	0.0541854	0.0618896	6.95878	0.0578381	0.809946	0.921089	-0.669241	6.95878	6.66535	0.00983052	0.0713485	58.3659	67.7876	67.1935	90.3478	112.078	113.263	78.3176	66.8283	95.9644
BJN34_07435	multidrug transporter AcrB	0.16969	7.5008	0.339185	0.5603	0.697656	0.690623	7.5008	5.60061	0.0179542	0.0940357	-0.520934	7.5008	3.21407	0.0730077	0.259366	49.4466	42.6916	44.5673	56.7708	70.1154	73.7462	19.1043	37.8295	44.1819
BJN34_07440	nitronate monooxygenase	-0.174482	1.75915	0.0777169	0.780416	0.863608	0.0748176	1.75915	0.0147802	0.903236	0.963935	-0.2493	1.75915	0.166535	0.68321	0.853735	2.51472	1.19052	2.18796	3.19903	2.35947	1.8594	0.94242	3.90304	1.03458
BJN34_07445	acyl-CoA dehydrogenase	2.21152	1.10402	6.01625	0.0141747	0.0417109	2.57812	1.10402	8.65724	0.00325765	0.0269486	-0.366606	1.10402	0.297909	0.585197	0.795895	2.21592	0.953598	1.00939	2.00852	2.81022	1.04369	0	0.60633	0
BJN34_07450	acyl-CoA dehydrogenase	0.206376	1.6206	0.120703	0.728273	0.827735	-0.112905	1.6206	0.0346211	0.852392	0.941165	0.319281	1.6206	0.300262	0.583718	0.794886	3.72301	1.25356	1.13264	1.48001	2.01024	1.30667	1.26775	0.796139	2.21443
BJN34_07455	acyl-CoA synthetase	2.00153	2.03752	8.17677	0.00424303	0.0152458	2.41194	2.03752	12.3242	0.000447118	0.00567961	-0.410413	2.03752	0.521251	0.470309	0.715961	1.21929	3.19082	2.20105	3.90699	3.31921	1.82735	0.631201	0	0.679066
BJN34_07460	short-chain dehydrogenase	0.332284	1.60626	0.153141	0.695552	0.803202	0.819003	1.60626	0.959348	0.327351	0.60135	-0.486719	1.60626	0.361189	0.547846	0.770367	0.872611	4.4275	0.893416	2.83039	3.0044	2.8996	1.2305	2.47257	0
BJN34_07465	ABC transporter substrate-binding protein	-0.325192	1.34216	0.135076	0.713226	0.817699	-0.0508045	1.34216	0.00336263	0.953758	0.981446	-0.274388	1.34216	0.0992862	0.752688	0.88905	1.66188	1.98589	0.599246	1.61282	2.6407	1.04237	3.28962	0.506254	0.268928
BJN34_07470	lipid-transfer protein	0.617108	1.051	0.206099	0.649842	0.770992	-0.248981	1.051	0.0328969	0.856073	0.942661	0.866089	1.051	0.4066	0.5237	0.752147	2.28718	0.85768	1.24336	0	2.28136	0	0.412832	1.91269	0
BJN34_07475	acyl-CoA dehydrogenase	0.528021	1.01759	0.458937	0.498121	0.643829	0.914847	1.01759	1.47607	0.224391	0.489041	-0.386826	1.01759	0.311166	0.576966	0.791404	1.90679	0.572981	0.5206	1.48679	1.29604	1.25457	0.424479	1.22637	0
BJN34_07480	LuxR family transcriptional regulator	1.1143	3.33679	7.2457	0.00710708	0.0232889	0.463566	3.33679	1.20123	0.273076	0.549547	0.650732	3.33679	2.72299	0.0989123	0.30979	5.7418	4.16598	2.90622	2.866	1.72033	3.55795	1.77797	1.87058	0.921539
BJN34_07485	amidase	N/A	N/A	N/A	N/A	N/A	N/A	N/A	N/A	N/A	N/A	N/A	N/A	N/A	N/A	N/A	0	0	1.24023	0.881683	0	0.435092	0	0	0
BJN34_07490	dipeptide ABC transporter ATP-binding protein DppD	N/A	N/A	N/A	N/A	N/A	N/A	N/A	N/A	N/A	N/A	N/A	N/A	N/A	N/A	N/A	0.532359	0	0.48774	2.0816	0	1.53312	0.483672	0	0
BJN34_07495	dipeptide/oligopeptide/nickel ABC transporter ATP-binding protein	N/A	N/A	N/A	N/A	N/A	N/A	N/A	N/A	N/A	N/A	N/A	N/A	N/A	N/A	N/A	0	0.446327	0.479234	0	0	1.00425	0.475237	0	0.143158
BJN34_07500	ABC transporter permease	N/A	N/A	N/A	N/A	N/A	N/A	N/A	N/A	N/A	N/A	N/A	N/A	N/A	N/A	N/A	0	0	0	0.591265	0	0	1.08619	0.800602	0.594183
BJN34_07505	ABC transporter permease	N/A	N/A	N/A	N/A	N/A	N/A	N/A	N/A	N/A	N/A	N/A	N/A	N/A	N/A	N/A	0.571436	0.465997	0.520052	0	0.517871	0	0	0	0.540027
BJN34_07510	ABC transporter substrate-binding protein	-2.02588	1.51779	5.83946	0.0156706	0.0451346	-0.749681	1.51779	0.952266	0.329143	0.602588	-1.2762	1.51779	2.26307	0.132491	0.366346	1.13418	0	0.294911	1.65578	1.16883	0.618	0.582958	2.71601	1.56686
BJN34_07515	Zn-dependent hydrolase	-0.457299	0.953381	0.177404	0.673614	0.788398	-0.872528	0.953381	0.625889	0.428867	0.693155	0.415229	0.953381	0.141203	0.707088	0.866346	0.960879	1.18273	0.396288	0.423529	0	1.56676	0	0.804065	2.13647
BJN34_07520	hypothetical protein	1.35598	4.25955	7.45726	0.0063181	0.021154	-0.671883	4.25955	1.74518	0.186484	0.442307	2.02786	4.25955	15.9096	6.64e-05	0.00141983	123.074	101.556	38.5423	21.8211	13.237	29.0764	11.5846	44.9833	25.2496
BJN34_07525	IclR family transcriptional regulator	0.298584	5.78506	1.5596	0.211723	0.35088	-0.16318	5.78506	0.457723	0.49869	0.74895	0.461764	5.78506	3.75389	0.0526847	0.21184	79.5556	68.7862	61.7833	48.4901	56.8983	48.904	33.2918	54.3288	52.3145
BJN34_07535	VanZ family protein	-0.53532	2.88103	1.51094	0.218996	0.359724	-1.10252	2.88103	6.0038	0.0142751	0.0796261	0.567203	2.88103	1.55469	0.212444	0.4826	16.7631	14.7333	13.0402	12.5103	7.46126	10.7568	18.7701	8.69299	25.3116
BJN34_07540	23S rRNA (adenine(2030)-N(6))-methyltransferase RlmJ	-1.31722	5.26501	13.7844	0.000205033	0.00116844	-0.586748	5.26501	2.87591	0.089914	0.280056	-0.730471	5.26501	4.27934	0.0385783	0.175619	18.6634	19.7411	27.4607	32.5107	39.4991	41.8057	56.2657	30.6105	47.9709
BJN34_07545	bifunctional tRNA (5-methylaminomethyl-2-thiouridine)(34)-methyltransferase MnmD/FAD-dependent 5-carboxymethylaminomethyl-2-thiouridine(34) oxidoreductase MnmC	-0.783774	5.70974	6.05068	0.0139009	0.0410097	-0.346345	5.70974	1.20841	0.271648	0.548338	-0.437429	5.70974	1.89592	0.168536	0.420909	18.5458	15.4074	16.3453	22.3172	28.6765	18.2846	29.7711	19.0414	20.8042
BJN34_07550	trigger factor	-1.79301	10.3957	19.9396	7.99e-06	7.04e-05	-0.917931	10.3957	5.46263	0.0194274	0.100086	-0.875082	10.3957	4.96533	0.0258603	0.13293	323.055	323.916	557.603	746.146	976.322	579.652	1328.52	825.519	1308.76
BJN34_07555	ATP-dependent Clp endopeptidase, proteolytic subunit ClpP	-0.675412	9.40238	8.171	0.00425655	0.0152865	-0.562632	9.40238	5.68935	0.0170682	0.0905597	-0.11278	9.40238	0.229556	0.631854	0.823133	783.97	692.458	738.713	795.983	882.95	769.456	936.704	884.574	1066.27
BJN34_07560	ATP-dependent protease ATP-binding subunit ClpX	-0.0307899	9.95232	0.0200244	0.887469	0.932165	-0.356565	9.95232	2.67661	0.101832	0.303743	0.325775	9.95232	2.23689	0.134751	0.369512	756.567	781.586	632.79	570.956	596.682	593.124	595.578	576.12	622.466
BJN34_07565	endopeptidase La	0.515811	11.2824	3.61854	0.057139	0.129418	0.480289	11.2824	3.13951	0.0764168	0.251717	0.0355222	11.2824	0.0172637	0.895466	0.956791	1128.02	1142.98	796.338	847.983	1202.43	956.492	431.121	741.299	576.291
BJN34_07580	peptidylprolyl isomerase	-1.86151	8.40032	29.0466	7.07e-08	1.01e-06	-0.955887	8.40032	8.05419	0.00453985	0.0348878	-0.905628	8.40032	7.1874	0.00734172	0.058096	54.467	57.0253	93.4305	144.864	146.377	110.389	213.702	171.466	235.593
BJN34_07585	arylesterase	0.822666	6.20056	8.08249	0.00446951	0.0159274	0.238796	6.20056	0.679759	0.40967	0.677156	0.58387	6.20056	4.15999	0.0413896	0.182621	153.143	140.026	86.5603	77.4923	77.6761	100.048	34.1431	68.6312	72.2816
BJN34_07590	ABC transporter	-1.11799	5.05364	13.1622	0.000285648	0.00157095	-0.553638	5.05364	3.3773	0.0661002	0.22854	-0.564348	5.05364	3.35656	0.0669379	0.245097	28.4286	28.6645	21.6129	34.2295	47.4505	36.617	56.0888	34.9115	46.4983
BJN34_07595	glucose-6-phosphate isomerase	0.258703	7.6437	1.45958	0.226997	0.369088	0.060427	7.6437	0.079546	0.777914	0.904602	0.198276	7.6437	0.863519	0.352756	0.626759	140.376	112.351	101.525	111.597	98.0077	104.487	67.8705	93.5276	79.6159
BJN34_07600	bifunctional ADP-dependent (S)-NAD(P)H-hydrate dehydratase/NAD(P)H-hydrate epimerase	1.22949	6.2173	18.4092	1.78e-05	0.000139258	1.23485	6.2173	18.5878	1.62e-05	0.000354405	-0.00535647	6.2173	0.000375789	0.984534	0.99644	60.9911	41.7879	47.292	66.9473	41.7933	45.7721	12.242	18.8407	21.296
BJN34_07605	amidase	1.09137	6.94748	11.101	0.000862831	0.00402587	0.174423	6.94748	0.286843	0.592251	0.804998	0.916945	6.94748	7.94073	0.00483344	0.0429061	136.003	147.386	77.1962	73.6482	56.0157	61.9427	25.0264	46.9621	65.6406
BJN34_07610	transcriptional regulator	0.702071	6.289	10.4319	0.00123858	0.00542781	0.392416	6.289	3.24298	0.0717299	0.241683	0.309655	6.289	2.11043	0.146298	0.38811	162.199	148.366	109.273	115.86	107.515	119.133	54.7851	75.9973	78.3384
BJN34_07615	LuxR family transcriptional regulator	-0.931153	8.04384	12.8621	0.000335297	0.0017983	-0.522908	8.04384	4.11849	0.0424169	0.170455	-0.408245	8.04384	2.50013	0.113837	0.333958	455.005	574.952	559.315	766.818	722.798	681.361	891.069	687.425	893.036
BJN34_07620	group II intron reverse transcriptase/maturase	-2.15443	9.72683	29.9412	4.45e-08	6.69e-07	-1.46267	9.72683	14.4295	0.000145501	0.00221905	-0.691767	9.72683	3.32033	0.0684283	0.248745	131.029	162.813	245.014	313.922	312.718	286.398	873.086	458.78	637.896
BJN34_07625	phosphoribosylformylglycinamidine synthase	-1.81542	9.32266	35.7901	2.2e-09	4.44e-08	-1.25525	9.32266	17.68	2.61e-05	0.000533834	-0.560171	9.32266	3.58839	0.0581844	0.223685	66.076	57.9577	80.2195	99.9839	119.718	90.9673	222.548	173.788	192.527
BJN34_07630	cytosine permease	-0.931368	2.39943	3.9637	0.0464915	0.110167	-0.584321	2.39943	1.66067	0.197512	0.455858	-0.347047	2.39943	0.532288	0.465647	0.712359	3.06639	1.67128	1.56972	2.78934	1.30067	3.97894	3.44466	3.63955	2.62876
BJN34_07635	creatininase	-0.121269	2.02592	0.0396585	0.84215	0.906004	-0.322328	2.02592	0.276207	0.599198	0.810392	0.201059	2.02592	0.109141	0.741124	0.884444	3.4647	2.5793	5.24485	5.43305	1.05746	3.75706	3.15601	1.80368	5.21523
BJN34_07640	hypothetical protein	-0.936236	4.87509	7.60288	0.00582753	0.0197021	-0.494648	4.87509	2.19312	0.138628	0.367664	-0.441589	4.87509	1.69349	0.193141	0.455678	43.2815	69.7777	61.6672	73.3297	100.524	68.8851	90.5032	68.9166	115.062
BJN34_07645	peptidylprolyl isomerase	-1.21212	8.43236	16.7209	4.33e-05	0.000302233	-0.536026	8.43236	3.3568	0.0669279	0.229934	-0.676092	8.43236	5.29463	0.0213913	0.118207	187.785	225.051	270.331	349.749	427.391	351.532	475.136	364.199	461.248
BJN34_07650	BolA family transcriptional regulator	-0.679113	5.7923	3.90628	0.0481059	0.113005	-0.204452	5.7923	0.361123	0.547883	0.778494	-0.47466	5.7923	1.92114	0.165731	0.416353	92.9323	107.117	125.634	152.287	162.036	154.761	196.897	100.249	124.277
BJN34_07655	septation protein A	-0.669626	5.46699	5.05136	0.0246066	0.0654034	-0.23959	5.46699	0.663067	0.415479	0.681623	-0.430036	5.46699	2.09725	0.147565	0.390722	50.7876	55.2628	54.5186	59.1668	91.8473	69.2139	79.7364	69.3739	57.675
BJN34_07660	peptide-methionine (R)-S-oxide reductase	0.0447323	5.64932	0.0246554	0.875229	0.924075	0.121311	5.64932	0.182069	0.669601	0.853205	-0.0765791	5.64932	0.0734699	0.78635	0.90801	96.447	98.3054	82.733	93.7703	130.689	70.4296	65.1745	75.662	78.3774
BJN34_07665	YdiU family protein	-0.33957	6.2953	1.48735	0.222628	0.364329	-0.410502	6.2953	2.17138	0.1406	0.370975	0.0709327	6.2953	0.064889	0.798929	0.91436	43.0507	35.7582	41.6671	30.174	44.0405	43.2003	46.8043	41.1114	35.7619
BJN34_07670	long-chain fatty acid--CoA ligase	1.16798	7.98144	9.92077	0.00163424	0.00683757	0.781866	7.98144	4.50238	0.0338477	0.14712	0.386118	7.98144	1.11578	0.290829	0.567205	192.564	204.958	157.11	172.028	133.767	125.667	35.3264	52.3525	116.357
BJN34_07675	branched-chain amino acid ABC transporter substrate-binding protein	1.81117	7.58394	23.8756	1.03e-06	1.15e-05	1.97691	7.58394	28.1874	1.1e-07	3.89e-06	-0.165745	7.58394	0.215999	0.642105	0.830876	112.724	134.377	235.498	181.526	218.115	169.354	29.5599	43.1686	43.9288
BJN34_07680	branched-chain amino acid ABC transporter permease	0.512638	4.66344	1.76419	0.184103	0.316332	1.25991	4.66344	10.7954	0.00101755	0.0109064	-0.747277	4.66344	4.01169	0.0451857	0.191355	15.0801	16.3762	26.9196	34.2639	42.9461	25.2063	8.68796	12.7704	13.0165
BJN34_07685	branched-chain amino acid ABC transporter permease	0.912751	5.41798	5.66807	0.0172764	0.0491059	1.39461	5.41798	13.1621	0.000285661	0.00392632	-0.481859	5.41798	1.67479	0.195618	0.458052	21.7538	25.1044	36.8264	44.2872	47.2	30.0682	7.73037	18.1224	11.5108
BJN34_07690	ABC transporter ATP-binding protein	0.0624349	4.12041	0.00516262	0.94272	0.967897	3.60036	4.12041	15.4754	8.36e-05	0.00142428	-3.53792	4.12041	15.2006	9.67e-05	0.00195149	4.8199	4.60026	2.55484	67.6325	73.6001	2.80003	3.59392	2.55155	2.78689
BJN34_07695	ABC transporter ATP-binding protein	1.01294	5.37186	7.1422	0.00752905	0.0244518	0.982735	5.37186	6.73312	0.00946389	0.0593013	0.0302093	5.37186	0.0067152	0.934689	0.975549	55.9075	50.2519	71.9426	65.4297	69.1399	45.3958	13.0729	37.6465	23.3012
BJN34_07700	gamma-aminobutyrate permease	-2.40987	3.03611	18.6199	1.6e-05	0.000127122	-0.889963	3.03611	3.07147	0.0796772	0.258764	-1.51991	3.03611	7.33015	0.00678074	0.0549121	2.11098	0.586157	1.45601	4.25443	5.27181	2.77458	7.36094	3.17394	7.9099
BJN34_07705	3-hydroxyacyl-CoA dehydrogenase	0.310796	9.00282	0.49109	0.483442	0.629793	0.428637	9.00282	0.932689	0.334165	0.608884	-0.117841	9.00282	0.0707962	0.790181	0.910958	341.027	184.793	156.167	110.566	296.148	332.42	88.0961	161.475	198.129
BJN34_07710	nicotinamidase	0.91689	6.7589	2.72238	0.0989505	0.198417	0.924602	6.7589	2.76819	0.0961549	0.293036	-0.0077128	6.7589	0.000196976	0.988802	0.997882	300.122	117.49	111.836	84.2756	187.102	260.51	26.522	97.518	105.756
BJN34_07715	acetyl-CoA acetyltransferase	1.12145	8.06659	5.57215	0.0182483	0.0514879	0.78384	8.06659	2.7537	0.0970298	0.294794	0.337611	8.06659	0.517858	0.471757	0.716204	457.026	182.358	171.831	108.077	274.188	253.737	54.6879	117.377	130.967
BJN34_07720	acyl-CoA dehydrogenase	1.51061	7.19697	8.86443	0.0029078	0.0110895	1.19243	7.19697	5.60387	0.0179208	0.0940357	0.318184	7.19697	0.412695	0.520605	0.749533	165.169	57.7157	68.6928	41.0313	103.532	87.7154	13.9367	27.62	42.0729
BJN34_07725	gluconate 5-dehydrogenase	1.41593	6.2379	7.41905	0.00645368	0.0215455	0.546067	6.2379	1.13164	0.287426	0.564246	0.869863	6.2379	2.88747	0.0892708	0.29115	242.267	89.7412	70.524	36.5563	90.0496	90.3804	20.4779	45.1636	55.8003
BJN34_07730	phenylacetic acid degradation protein	1.01552	5.20626	9.57611	0.00197125	0.00800525	0.647927	5.20626	3.88864	0.0486136	0.186586	0.367594	5.20626	1.32973	0.248853	0.525396	133.071	83.2772	73.5304	52.1889	86.9999	86.326	29.2176	35.3053	50.7477
BJN34_07735	NADP-dependent oxidoreductase	1.14758	6.95665	7.97899	0.00473234	0.0166413	0.670735	6.95665	2.76132	0.0965684	0.293778	0.476846	6.95665	1.41806	0.233723	0.508899	246.794	118.942	88.4354	77.0699	126.35	119.934	30.1996	66.1009	69.6346
BJN34_07740	class II aldolase/adducin family protein	1.0616	5.75975	7.82448	0.00515432	0.0178532	0.388639	5.75975	1.05416	0.30455	0.581551	0.67296	5.75975	3.23489	0.0720852	0.257277	139.952	62.2621	42.6036	43.204	55.8122	52.2922	27.3364	37.5432	27.9186
BJN34_07745	glutathione S-transferase	0.668476	4.96302	2.10711	0.146616	0.267501	0.112222	4.96302	0.0591839	0.807791	0.919899	0.556254	4.96302	1.47911	0.223914	0.497835	71.3703	26.7526	16.9083	19.4636	27.8905	29.5414	14.0915	25.9409	17.2007
BJN34_07750	SDR family NAD(P)-dependent oxidoreductase	1.49843	5.26724	9.5324	0.00201876	0.00816942	0.851985	5.26724	3.13058	0.0768362	0.252699	0.646441	5.26724	1.87707	0.170667	0.424406	97.4852	50.974	22.9849	27.2575	33.1202	47.3317	7.4517	19.9614	20.969
BJN34_07755	alpha/beta hydrolase	1.31026	5.35153	12.0003	0.000531923	0.0026708	0.258365	5.35153	0.467083	0.494332	0.745698	1.05189	5.35153	7.96626	0.00476573	0.0425231	102.531	49.0654	29.8544	28.0901	27.1848	31.5311	14.4469	21.5578	22.1484
BJN34_07760	beta-N-acetylhexosaminidase	0.217517	3.2665	0.405623	0.5242	0.66683	0.135165	3.2665	0.156052	0.692817	0.864804	0.0823522	3.2665	0.062411	0.802725	0.916227	4.59719	5.18689	4.2043	4.50127	3.73591	5.3771	3.50976	2.2639	3.95478
BJN34_07765	O-acetyl-ADP-ribose deacetylase	1.16091	6.86468	10.511	0.00118667	0.00525352	0.380806	6.86468	1.1479	0.28399	0.560213	0.780106	6.86468	4.85231	0.0276091	0.139639	389.628	337.556	157.131	152.677	138.502	223.869	70.134	155.307	91.7869
BJN34_07770	4-hydroxybutyrate dehydrogenase	0.381185	6.95446	2.17424	0.140339	0.258501	0.193893	6.95446	0.562349	0.453315	0.71384	0.187293	6.95446	0.531137	0.466129	0.712782	121.838	105.619	93.0886	86.3217	101.705	97.505	44.406	88.7881	69.2277
BJN34_07775	alpha/beta hydrolase	1.17118	7.10567	27.0619	1.97e-07	2.55e-06	1.07154	7.10567	22.7103	1.88e-06	5.28e-05	0.099642	7.10567	0.20803	0.648316	0.833845	152.7	157.674	133.645	129.264	134.461	159.405	43.8123	52.6468	64.6984
BJN34_07780	hypothetical protein	1.94547	8.08839	46.4906	9.21e-12	2.83e-10	1.81303	8.08839	40.6813	1.79e-10	8.99e-09	0.132438	8.08839	0.235222	0.627679	0.821695	345.132	302.974	345.072	238.41	343.792	346.389	48.6855	80.2316	84.6146
BJN34_07785	MFS transporter	1.457	5.78596	24.6939	6.72e-07	7.85e-06	1.07369	5.78596	13.4592	0.00024381	0.00346641	0.383315	5.78596	1.86647	0.17188	0.425948	165.71	154.03	139.91	93.2272	149.105	113.9	29.8745	57.439	49.8803
BJN34_07790	NAD-dependent epimerase	0.667712	5.64703	7.73477	0.00541675	0.0185525	0.366947	5.64703	2.31839	0.127852	0.350455	0.300765	5.64703	1.64292	0.199925	0.463965	55.0569	51.1323	55.899	48.8413	37.4094	49.502	21.3481	30.3668	32.6574
BJN34_07795	hydroxypyruvate isomerase	0.694558	5.60793	8.26911	0.00403252	0.0145802	0.180749	5.60793	0.550891	0.457954	0.717982	0.51381	5.60793	4.68304	0.0304618	0.149693	71.4169	67.5031	68.8943	47.9692	38.8125	63.1626	31.4226	38.4994	34.65
BJN34_07800	MFS transporter	0.883835	5.25218	5.35468	0.0206668	0.0569806	0.380989	5.25218	0.994388	0.318672	0.59394	0.502846	5.25218	1.79075	0.180835	0.438718	26.9875	30.9	37.8227	22.9477	20.6382	26.7367	20.9843	9.13661	11.2238
BJN34_07805	aldolase	1.0748	5.18997	4.35867	0.0368211	0.091151	0.695793	5.18997	1.83997	0.174955	0.4246	0.379003	5.18997	0.563064	0.453028	0.705843	62.7504	63.628	64.4502	44.4647	27.7775	80.9225	42.0512	16.5139	12.489
BJN34_07810	four-carbon acid sugar kinase family protein	1.26668	5.15195	6.92893	0.00848122	0.0269995	0.798342	5.15195	2.77786	0.0955756	0.291739	0.468334	5.15195	0.996685	0.318114	0.594094	29.602	32.49	35.2124	29.2038	17.1982	26.7651	19.2933	6.488	5.72212
BJN34_07815	3-hydroxyisobutyrate dehydrogenase	1.2921	4.60856	4.70888	0.0300072	0.0772954	0.824147	4.60856	1.93553	0.164154	0.407385	0.467955	4.60856	0.65031	0.420002	0.68233	26.8394	27.744	40.7973	29.1046	14.8373	28.746	20.2687	7.00107	3.26968
BJN34_07820	FadR family transcriptional regulator	1.81698	4.18162	13.4725	0.000242082	0.00135176	1.57211	4.18162	10.131	0.00145794	0.0143188	0.244878	4.18162	0.281857	0.595487	0.801546	29.1015	25.8695	31.5044	18.2086	11.4357	46.8089	6.77946	5.45183	7.51371
BJN34_07825	GNAT family N-acetyltransferase	-1.2635	5.06054	19.0531	1.27e-05	0.000104462	-0.432545	5.06054	2.39968	0.12136	0.339565	-0.830954	5.06054	8.27334	0.00402315	0.0374412	42.3431	41.6947	32.1182	73.3175	69.8983	67.3369	92.4564	57.6846	73.7213
BJN34_07830	hypothetical protein	0.819505	6.80968	11.4148	0.000728629	0.00349863	0.321942	6.80968	1.76192	0.184386	0.439394	0.497563	6.80968	4.31116	0.0378631	0.173045	183.42	159.394	126.907	101.972	105.914	129.49	49.9012	84.9498	82.6033
BJN34_07835	DUF4936 domain-containing protein	0.388005	5.77855	2.53989	0.111003	0.21632	-0.212178	5.77855	0.742927	0.388725	0.659851	0.600183	5.77855	6.09616	0.0135476	0.087749	186.448	228.854	190.814	126.093	117.274	165.988	96.5943	128.77	154.374
BJN34_07840	folate-binding protein YgfZ	0.226668	6.61574	0.96265	0.32652	0.477976	-0.101757	6.61574	0.192767	0.660623	0.848842	0.328425	6.61574	2.03347	0.153869	0.399913	91.5948	86.9313	102.853	75.9985	72.139	83.2845	63.4989	65.1088	68.653
BJN34_07845	aminodeoxychorismate lyase	-1.10816	5.46975	15.2051	9.64e-05	0.000606621	-0.442452	5.46975	2.54623	0.110558	0.319892	-0.665711	5.46975	5.51511	0.0188529	0.107704	23.2724	18.8102	29.1534	37.548	37.8272	42.4994	45.476	38.6882	42.7264
BJN34_07850	dTMP kinase	-0.768621	5.66846	7.33611	0.00675828	0.0223255	-0.615094	5.66846	4.75426	0.0292258	0.132608	-0.153526	5.66846	0.292016	0.588932	0.797537	60.8315	42.1131	63.9707	72.0992	60.7625	59.5922	82.2909	66.0868	84.9158
BJN34_07855	DNA polymerase III subunit delta'	-0.271672	6.67797	1.66099	0.19747	0.332525	-0.262615	6.67797	1.55554	0.21232	0.475055	-0.00905659	6.67797	0.00185185	0.965675	0.988356	83.3877	88.0156	75.7619	89.2899	74.0762	91.5748	80.6021	80.1807	81.6892
BJN34_07860	pilus assembly protein	0.0364674	6.12629	0.0229124	0.879685	0.927174	-0.193708	6.12629	0.642031	0.422976	0.687255	0.230175	6.12629	0.917035	0.338255	0.613085	198.642	174.828	123.554	143.39	115.149	170.735	127.59	115.265	145.706
BJN34_07865	N-acetyltransferase	0.0751714	5.83665	0.0949213	0.758012	0.848169	0.17281	5.83665	0.504301	0.477617	0.732478	-0.0976387	5.83665	0.163828	0.685656	0.854786	106.136	121.071	67.0611	113.101	106.497	97.3494	73.8277	71.1721	78.6075
BJN34_07870	TatD family deoxyribonuclease	-0.231361	6.84566	1.00013	0.31728	0.469594	-0.113012	6.84566	0.239783	0.624363	0.826436	-0.118349	6.84566	0.263249	0.607897	0.807434	109.249	126.138	111.034	125.117	127.344	132.709	118.937	100.029	110.436
BJN34_07875	hypothetical protein	-0.473677	7.4715	4.37209	0.0365322	0.0906301	-0.198558	7.4715	0.775096	0.378645	0.650233	-0.275119	7.4715	1.48155	0.223532	0.497739	166.258	161.978	184.646	228.132	197.713	215.51	184.503	190.881	209.827
BJN34_07880	DUF1232 domain-containing protein	-0.41293	5.93067	2.90552	0.0882768	0.181751	-0.0283104	5.93067	0.013949	0.905984	0.965189	-0.38462	5.93067	2.55146	0.110192	0.329217	94.6133	114.034	122.501	165.437	137.865	144.474	113.716	126.139	123.277
BJN34_07885	ergothioneine biosynthesis protein EgtB	0.633633	5.64842	3.58345	0.058358	0.131576	0.139214	5.64842	0.172132	0.678224	0.855845	0.494418	5.64842	2.21834	0.13638	0.371768	56.0594	53.4592	22.1904	30.0422	25.9712	37.3233	16.3152	30.8966	20.5137
BJN34_07890	FMN-dependent NADH-azoreductase	3.14171	4.95013	58.6095	1.92e-14	8.02e-13	2.47586	4.95013	36.9061	1.24e-09	5.68e-08	0.665855	4.95013	3.50543	0.0611679	0.231297	64.9029	53.921	94.645	38.2792	39.3467	63.5461	5.57573	5.75699	8.42856
BJN34_07895	LysR family transcriptional regulator	-0.0443889	5.06243	0.0261893	0.871439	0.921901	-0.0693862	5.06243	0.0641234	0.800094	0.916096	0.0249973	5.06243	0.00843525	0.926822	0.972468	36.4239	23.9478	29.5907	31.2642	23.5615	35.9783	22.9288	30.575	22.2816
BJN34_07900	DoxX family protein	0.975028	6.72596	6.65092	0.00991048	0.0307438	0.157971	6.72596	0.176303	0.67457	0.854937	0.817058	6.72596	4.72128	0.0297915	0.147763	386.692	431.323	159.432	181.667	157.301	213.717	79.2105	204.769	115.979
BJN34_07905	diguanylate phosphodiesterase	0.868482	4.67908	9.02697	0.00266025	0.0102845	0.627019	4.67908	4.66111	0.0308533	0.137884	0.241462	4.67908	0.761697	0.382798	0.651547	29.0808	24.3921	14.7239	19.994	14.9358	22.9631	8.20611	11.5666	9.96643
BJN34_07910	cell division protein FtsK	-1.17425	7.04343	20.5153	5.92e-06	5.39e-05	-0.657292	7.04343	6.6044	0.0101727	0.0624987	-0.516962	7.04343	4.02836	0.0447414	0.190449	25.2852	21.4932	19.5966	36.6726	34.1374	25.5828	43.4909	35.5156	41.7217
BJN34_07915	cupin	-1.22932	3.98448	19.332	1.1e-05	9.31e-05	-0.622996	3.98448	5.47778	0.0192597	0.0995182	-0.606326	3.98448	4.53956	0.03312	0.158263	26.6003	25.3609	20.9603	42.8097	30.8591	40.4581	39.6247	55.6912	44.7338
BJN34_07920	type VI secretion system baseplate subunit TssE	N/A	N/A	N/A	N/A	N/A	N/A	N/A	N/A	N/A	N/A	N/A	N/A	N/A	N/A	N/A	1.24928	0	1.13694	1.71733	2.46814	1.67566	0.512648	1.83765	1.19678
BJN34_07925	ClpV1 family T6SS ATPase	0.0322869	2.00796	0.00451139	0.946449	0.96898	-0.263212	2.00796	0.286807	0.592274	0.804998	0.295499	2.00796	0.38241	0.536316	0.761734	1.11982	1.29068	0.99924	0.972974	1.36349	0.548034	0.742178	0.657969	1.35301
BJN34_07930	Hcp family T6SS protein CtsH1	0.890562	2.85178	1.76401	0.184125	0.316332	1.21371	2.85178	3.30194	0.0691981	0.235443	-0.323151	2.85178	0.256931	0.612236	0.81023	11.2638	14.64	10.8547	15.0159	15.7477	16.5623	7.61751	0	7.75891
BJN34_07935	flagellar motor protein MotB	1.18884	1.95625	5.47029	0.0193424	0.0540028	1.51803	1.95625	9.63467	0.00190939	0.0179152	-0.329184	1.95625	0.655383	0.418195	0.681794	2.26248	1.26066	1.61048	2.30661	1.99855	2.34699	0.347551	1.01989	0.353586
BJN34_07940	DotU family type IV / VI secretion system protein	0.0141164	0.943002	0.000206879	0.988524	0.993546	0.957007	0.943002	0.944015	0.331247	0.605137	-0.94289	0.943002	0.958864	0.327473	0.602049	3.64462	0.411495	0	3.90655	0.774363	3.24821	1.54228	0.802265	0.444761
BJN34_07945	type VI secretion system-associated protein	0.464187	1.18174	0.459124	0.498034	0.643829	0.723368	1.18174	1.17585	0.278202	0.554767	-0.259181	1.18174	0.178537	0.672633	0.84663	0.990225	1.61401	0.398276	1.6676	0.901151	1.38396	0.994884	0.390093	0.403391
BJN34_07950	EvpB family type VI secretion protein	0.245549	2.9127	0.0715221	0.789133	0.86895	1.18649	2.9127	1.66441	0.197009	0.455229	-0.940945	2.9127	1.07407	0.300027	0.576571	2.29122	7.17279	0	5.87518	7.39287	4.51466	0.950473	2.7866	2.56616
BJN34_07955	type VI secretion system-associated protein	0.136046	1.80276	0.046135	0.829931	0.897882	0.766748	1.80276	1.5882	0.207583	0.469095	-0.630702	1.80276	1.1461	0.284366	0.56202	1.77634	7.43202	2.48562	6.41245	6.45843	6.36025	0.887108	5.35951	2.93812
BJN34_07960	type IV secretion protein Rhs	0.379981	2.58618	0.694756	0.404551	0.557325	0.118242	2.58618	0.0655411	0.797943	0.914728	0.261739	2.58618	0.351282	0.553389	0.774856	1.4304	3.49794	1.41115	2.02275	1.4132	2.01799	1.1441	1.76548	1.0103
BJN34_07965	hypothetical protein	0.3287	3.67991	0.864616	0.35245	0.504074	0.085484	3.67991	0.0574511	0.810571	0.921351	0.243216	3.67991	0.494906	0.481747	0.721863	7.9104	8.53436	3.93332	5.39997	6.23423	5.52005	5.04707	4.51265	3.25788
BJN34_07975	hypothetical protein	-0.393806	4.3636	0.665029	0.41479	0.566247	2.0721	4.3636	19.3819	1.07e-05	0.000245353	-2.46591	4.3636	26.639	2.45e-07	7.86e-06	10.3412	8.4803	18.1262	68.2955	38.72	115.325	9.32664	16.2965	15.5617
BJN34_07980	transposase	-0.420332	2.73925	0.639403	0.423927	0.573743	1.91979	2.73925	18.012	2.2e-05	0.000456448	-2.34013	2.73925	25.9638	3.48e-07	1.08e-05	5.18513	4.23785	7.29632	29.3719	20.3735	44.9268	5.70703	6.8934	5.57013
BJN34_07985	transposase	1.80308	6.37871	38.0956	6.74e-10	1.51e-08	2.36231	6.37871	64.1934	1.13e-15	8.68e-14	-0.559231	6.37871	4.19075	0.0406451	0.180517	61.4549	51.4062	36.2188	59.9534	70.0835	92.0954	11.7571	8.71502	13.5126
BJN34_07990	hypothetical protein	-0.260101	1.14949	0.110542	0.739528	0.836135	1.60385	1.14949	6.2238	0.0126044	0.0729707	-1.86395	1.14949	8.5437	0.0034672	0.0336702	1.81296	3.29959	0	6.85178	5.2637	8.02422	0.634791	2.43415	2.05656
[truncated: 5,674 more rows]
