# Supplementary material for: Transcriptome differences between Cupriavidus necator NH9 grown with 3-chlorobenzoate and that grown with benzoate
Source: Research Square preprint supplement (doi:10.21203/rs.3.rs-50641/v2), 2020-10-16
Supplement: Supplementary file 5 [file c771a8bea42f815c2f7a19c0.xlsx]

## Sheet: TableS6
Table S6 Expression of genes encoding transporter except for MFS and ABC types
Family	Replicon	Locus	Componenta	Protein	Accession number	%Amino acid identity	3-CB vs. CA		BA vs. CA		3-CB vs. BA
							LogFCb, c	FDRd	LogFCb, e	FDRd	LogFCb, f	FDRd
Benzoate/H+ symporter (BenE) family
	Chr.1	BJN34_14300	-	BenE2	AAN68775.1	47.12	-0.257382	0.477347	-0.258314	0.597874	0.000932421	0.999512
Divalent anion/Na+ symporter (DASS) family
	Chr.1	BJN34_03715	-	GacP	CCC80015.1	20.867	-1.35467	0.000707261	-0.151394	0.848842	-1.20328	0.00885356
Solute/sodium symporter (SSS) family
	Chr.1	BJN34_08680	-	PaaL	AAC24338.1	65.125	3.0936	1.54e-15	3.20137	3e-16	-0.107766	0.886877
		BJN34_13555	-			32.609	0.316959	0.398479	0.318545	0.520928	-0.0015855	0.999406
	Chr.2	BJN34_22225	-			60.421	1.41795	0.0482168	1.76962	0.0195494	-0.351675	0.715961
		BJN34_26835	-			24.051	2.64179	0.000947442	2.3857	0.00696169	0.256084	0.860526
		BJN34_29130	-			64.286	-1.31785	0.208457	-2.18985	0.0608943	0.872001	0.577088
		BJN34_32040	-			77.885	-1.92755	0.0618674	0.37004	0.823405	-2.29759	0.0484146
Tripartite ATP-independent periplasmic transporter (TRAP-T) family
	Chr.1	BJN34_06770	SC	TarQ	CAE27224.1	16.7	-0.200477	0.66556	0.273687	0.650233	-0.474164	0.359054
		BJN34_06775	LC	TarM	CAE27225.1	29.318	-0.304646	0.396823	-0.229189	0.656433	-0.0754575	0.902453
		BJN34_06780	SBP	TarP	CAE27223.1	23.03	-0.735475	0.0155452	-0.438297	0.274669	-0.297179	0.52395
	Chr.2	BJN34_30790	SBP	FcbT1	AAF16407.1	22.297	-0.593552	0.178586	-0.633701	0.229934	0.0401493	0.962072
		BJN34_30795	SC	FcbT2	AAF16408.1	17.12	-0.73005	0.384587	-1.16915	0.2293	0.439099	0.733339
		BJN34_30800	LC	FcbT3	AAF16409.1	30.896	-1.53609	0.00442583	-0.620886	0.407479	-0.9152	0.201693
Tripartite tricarboxylate transporter (TTT) family
	Chr.1	BJN34_14920	SBP	TphCII	BAE47084.1	33.93	-0.303952	0.316892	-0.266245	0.515992	-0.0377071	0.94874
		BJN34_14930	SC	TpiB	BAN66715.1	40.994	0.689425	0.317101	2.53854	6.52e-05	-1.84911	0.00642666
		BJN34_14935	LC	TpiA	BAN66716.1	76.143	0.447147	0.455704	1.83181	0.00076216	-1.38466	0.0192407
		BJN34_19840	SBP	TphCII	BAE47084.1	25.22	-4.21616	3.75e-10	-4.83393	3.2e-12	0.617776	0.538286
		BJN34_19845	SC	TpiB	BAN66715.1	21.14	-4.69786	9.41e-12	-4.62675	2.78e-11	-0.0711093	0.958013
		BJN34_19850	LC	TpiA	BAN66716.1	46.123	-4.59405	8.25e-16	-4.60016	1.25e-15	0.00610608	0.997991
aLC, large component; SBP, substrate binding protein; SC, small component.
bLogFC indicates log fold-change.
cLogFC calculated from 3-CB/CA.
dFDR indicates false discovery rate.
eLogFC calculated from BA/CA.
fLogFC calculated from 3-CB/BA.
